# Supplementary material for: Comparative genomics of the fungal pathogens Candida dubliniensis and Candida albicans
Source: HighWire-hosted journal article supplement (doi:10.1101/gr.097501.109), 2009-09-10
Supplement: Supplementary_Tables.xlsx [file Supplementary_Tables.xlsx]

## Sheet: Table S1
Table S1. Comparison of C. dubliniensis and C. albicans nuclear genomes.
Feature	C. dubliniensis	C. albicans
Genome
Size (bp)	14618422	14283898
(G+C) content (%)	33.25	33.46
Chromsome 1 (bp)	3214061	3188549
Chromsome 2 (bp)	2289089	2232035
Chromsome 3 (bp)	1863824	1799408
Chromsome 4 (bp)	1641709	1603443
Chromsome 5 (bp)	1245899	1190928
Chromsome 6 (bp)	1073895	1033530
Chromsome 7 (bp)	1022435	949616
Chromsome R (bp)	2267510	2286389
Genes
Chromosome 1 (nos. genes)	1277	1381
Chromosome 2 (nos. genes)	960	1014
Chromosome 3 (nos. genes)	704	757
Chromosome 4 (nos. genes)	625	673
Chromosome 5 (nos. genes)	487	521
Chromosome 6 (nos. genes)	410	437
Chromosome 7 (nos. genes)	381	405
Chromosome R (nos. genes)	914	988
Total nos. genes	5758	6176
Average gene length (bp)	1527	1458
Gene density (bp per gene)	2538	2312
Coding percentage (excl. introns)	60.1	63
Nos. spliced genes	333	355
Nos. unspliced genes	5425	5821
(G+C) content (%)	34.8	35.1
Exons
Number	6130	6565
Ave. no. per gene	1.06	1.06
Mean length (bp)	1435	1372.1
Total length (bp)	8797094	9007944
Introns
Number	372	389
Mean length (bp)	161	166.7
Total length (bp)	59900	64861
Miscellaneous Features
Pseudogenes	115	8
Transposable elements	323	not known
Note: Transposable elements are not annotated in the C. albicans genome. Therefore, the figures given here for C. albicans include contributions from these features. For the C. dubliniensis figures, transposable elements have been removed.

## Sheet: Table S2
Table S2. Single nucleotide polymorphisms (SNP) in the C. dubliniensis genome sequence.
	Chr	Ref	SNP	C/N		Chr	Ref	SNP	C/N		Chr	Ref	SNP	C/N		Chr	Ref	SNP	C/N		Chr	Ref	SNP	C/N		Chr	Ref	SNP	C/N		Chr	Ref	SNP	C/N		Chr	Ref	SNP	C/N
	position	base	base			position	base	base			position	base	base			position	base	base			position	base	base			position	base	base			position	base	base			position	base	base
Chr 1					Chr 2					Chr 3					Chr 4					Chr 5					Chr 6					Chr 7					Chr R
	29325	G	A	C		7836	C	T	C		42538	T	C	N		40887	C	T	N		32005	G	T	C		49252	C	T	N		40434	C	T	C		71996	T	G	N
	98063	A	C	N		7883	A	C	N		135883	C	T	N		43512	C	T	C		49581	A	G	C		49286	C	T	N		99294	T	A	N		81503	G	A	N
	133259	C	T	C		7893	A	G	N		181056	T	G	C		87229	G	A	N		90328	G	A	C		49343	C	T	N		132725	C	T	N		81645	G	A	N
	133344	C	T	N		7896	C	G	N		327666	T	G	N		87236	G	A	N		90397	G	A	C		56170	C	T	N		176141	A	G	C		81647	G	A	N
	155423	C	T	N		7898	A	G	N		327807	G	A	N		87454	G	A	N		105617	T	C	C		116614	G	A	C		188819	T	A	C		81649	G	A	N
	155615	C	T	N		7902	A	C	N		352821	T	C	N		87503	G	A	N		129771	A	C	C		119276	A	G	C		191561	T	C	C		199389	C	T	N
	169963	G	A	C		22144	G	A	N		409884	C	T	N		100084	G	A	N		134797	G	A	N		125354	A	T	N		195523	T	G	N		502369	A	C	N
	213671	C	T	N		22408	G	A	N		425193	A	G	N		121006	G	A	C		137418	C	T	N		207078	A	C	C		254423	C	A	C		502371	A	C	N
	213765	C	T	N		99536	C	T	C		501654	T	G	N		121117	G	A	C		152369	G	T	C		218026	A	G	N		272279	T	G	N		565344	T	C	N
	242914	G	A	C		123020	A	C	N		501803	G	A	C		184558	C	A	C		174310	T	C	N		262615	T	G	N		295696	G	T	N		565347	T	A	N
	242998	G	A	C		128963	C	T	C		546535	A	G	N		232223	A	G	C		174325	T	A	N		262619	T	G	N		306768	T	C	N		565478	G	A	C
	243115	G	A	C		174601	G	A	C		568954	A	T	N		244324	G	T	N		174379	A	G	N		276098	G	A	C		311383	G	T	C		591971	A	C	N
	428316	G	A	C		174604	T	C	C		615979	G	A	N		244372	T	A	N		174400	A	C	N		276146	A	G	C		338704	T	G	C		592472	T	G	N
	447443	G	A	C		174634	A	T	C		646490	C	T	C		244380	G	T	N		174401	A	T	N		276551	T	C	C		345304	G	A	C		592474	T	G	N
	514902	T	A	N		174636	T	C	C		762717	G	A	C		244453	A	T	N		174417	A	T	N		276590	G	A	C		349430	G	A	C		592712	T	G	N
	583870	G	A	N		174637	T	A	C		823663	A	G	C		244474	G	A	N		179961	G	A	N		276785	A	G	C		349541	G	A	C		593821	G	A	N
	809297	G	A	N		174640	A	T	C		828900	A	G	C		244508	G	A	N		185139	G	A	N		277370	G	A	C		353042	G	A	C		612899	G	A	C
	837189	A	T	N		174645	G	A	C		829091	T	G	C		244552	A	G	N		186101	A	G	N		277475	G	A	C		377844	C	T	C		773492	G	A	N
	837828	G	A	N		174646	T	A	C		829115	C	T	C		244553	G	C	N		186161	G	A	N		277490	C	T	C		401899	G	A	C		942903	C	T	C
	900210	C	T	C		174647	G	T	C		843186	A	C	N		244584	T	G	N		186207	T	G	N		277694	C	T	C		404628	G	A	N		942916	C	T	C
	922174	G	A	N		174670	A	G	C		843215	G	A	N		244615	T	A	N		187233	A	G	N		277917	A	G	C		411169	A	G	C		950974	A	C	N
	957566	C	T	N		333939	G	A	C		843318	G	A	C		244796	A	G	N		187315	C	T	N		278185	A	G	N		414749	A	G	N		950979	A	C	N
	957608	C	T	N		345008	C	T	N		843351	G	A	C		244820	T	C	N		187801	C	T	N		282916	C	T	N		416691	C	T	C		956187	G	A	C
	988740	T	G	N		363303	A	G	C		849132	C	T	C		244958	C	T	N		187863	T	C	N		299441	C	G	N		416757	C	T	C		1040362	C	T	C
	1026741	C	T	C		421506	G	A	C		860027	A	G	C		245399	T	G	N		188329	A	C	C		299442	A	G	N		418236	G	A	C		1040365	C	T	C
	1080038	G	A	N		433502	C	T	N		867918	C	T	C		245579	C	G	N		190834	A	C	C		299509	T	C	N		418378	C	T	C		1040531	C	T	C
	1122931	A	C	N		433696	G	A	N		867919	C	T	C		245632	A	C	N		194462	T	C	C		299754	A	T	N		418398	A	G	C		1040585	C	T	N
	1129108	T	G	N		441424	A	C	N		869657	T	C	N		245653	C	T	N		194626	A	C	N		299760	T	A	N		418483	C	T	C		1077761	C	T	C
	1129170	G	A	N		455805	C	T	C		871299	T	C	N		245654	A	G	N		195338	A	G	C		299764	G	C	N		418484	G	T	C		1077763	C	T	C
	1138092	A	C	N		456847	A	G	N		871941	T	A	N		245669	C	T	N		195422	C	A	C		299981	A	T	N		418515	C	T	C		1077944	C	T	N
	1295495	A	T	N		526532	G	A	C		872094	C	A	N		245729	A	C	N		195961	A	G	C		300022	T	C	N		418529	C	T	C		1080866	T	G	C
	1295499	A	T	N		527533	C	T	C		872266	C	T	N		245740	C	T	N		195964	A	C	C		300097	G	A	N		418632	G	A	C		1119243	C	T	C
	1295510	A	T	N		536500	G	A	N		872278	T	G	N		245745	A	G	N		195986	C	T	N		303897	C	T	N		418644	T	G	C		1237432	C	A	C
	1295512	A	G	N		579372	A	G	N		872365	C	T	N		245789	G	C	N		196142	C	T	N		304526	C	T	N		418660	T	C	C		1263881	A	C	N
	1331426	C	T	C		597513	G	A	N		872488	G	A	N		246437	G	A	N		196261	A	G	C		304583	T	G	N		418909	A	G	C		1394393	A	T	N
	1352675	C	T	N		601897	G	C	N		872576	C	A	N		247012	T	C	N		196648	G	A	C		304667	T	C	N		418916	T	C	C		1644143	G	A	C
	1352678	C	T	N		601900	A	T	N		872577	C	T	N		247018	T	C	N		196831	T	C	C		304674	G	A	N		419346	T	G	N		1716123	C	T	N
	1352681	C	T	N		601931	C	T	N		872590	C	T	N		247092	T	C	N		196896	A	G	C		304739	G	T	N		419509	A	C	N		1716138	A	C	N
	1352684	C	T	N		601934	C	T	N		872660	A	T	N		247120	C	A	N		197047	G	A	C		304804	G	A	N		419749	T	C	N		1716161	C	T	N
	1450352	A	G	N		602007	G	A	N		872836	A	G	N		247187	A	G	N		197090	C	T	C		304909	C	T	N		419795	C	T	N		1716168	T	A	N
	1489414	A	T	N		602047	T	C	N		874481	A	G	N		247402	A	G	N		197155	A	G	C		304931	C	T	N		420050	T	C	N		1716241	C	T	N
	1508690	C	T	C		602235	C	A	N		885765	A	C	N		247566	G	A	N		197397	A	G	C		304945	C	T	N		420161	G	A	N		1716247	G	T	N
	1558324	G	A	N		602532	A	C	N		888433	G	T	C		247668	T	C	N		197398	G	A	C		305050	T	G	N		420652	A	C	N		1716248	A	T	N
	1572338	C	T	C		604176	C	G	C		888564	T	G	C		247680	C	T	N		197467	T	A	C		305327	A	G	N		420760	G	A	N		1716391	C	T	N
	1586573	A	G	N		605204	A	G	N		889189	C	T	C		247722	C	T	N		197482	G	A	C		305341	T	C	N		420790	A	G	N		1716445	C	T	N
	1586672	G	C	N		607716	C	T	C		890145	C	T	N		247738	A	G	N		197622	A	G	C		305445	C	T	N		420832	C	T	N		1716777	C	T	N
	1586815	G	T	N		610699	A	G	C		890804	T	C	N		247774	T	C	N		197683	G	A	C		318518	C	G	C		420897	C	T	N		1717034	A	G	N
	1587000	A	G	N		610831	C	T	C		891413	C	T	C		247881	C	G	N		197774	C	T	C		318520	G	A	C		420898	T	A	N		1717071	C	G	N
	1587293	A	C	C		613181	A	G	N		897079	T	C	N		265870	T	A	N		198394	C	T	C		318524	A	G	C		420935	T	C	C		1717093	A	G	N
	1587338	T	C	C		614239	A	G	C		913069	G	C	N		265872	T	A	N		198491	T	C	C		318528	A	G	C		421259	A	G	C		1717101	G	T	N
	1588188	G	A	C		615711	C	T	C		913892	A	G	C		265874	T	A	N		198982	G	A	C		318531	G	T	C		421328	C	T	C		1717115	C	T	N
	1588238	A	G	C		615739	C	T	C		922028	T	C	N		288680	A	C	N		199482	C	T	C		318532	G	T	C		421481	G	A	C		1717132	G	A	N
	1588746	C	G	C		616606	T	A	N		923976	T	A	N		290636	A	G	N		199754	T	A	N		318534	T	A	C		421511	T	G	C		1719016	T	C	N
	1588772	C	T	C		616839	A	T	N		924323	T	C	N		296959	C	T	N		199863	A	T	N		318541	G	T	C		421902	T	C	N		1719065	T	A	N
	1588842	G	A	C		621021	T	C	C		924538	C	T	C		296962	C	T	N		199880	T	G	N		318543	T	A	C		422370	C	T	N		1719072	A	T	N
	1588862	G	T	C		621530	T	C	N		924634	G	T	C		308964	T	A	C		199907	T	C	N		318550	T	G	C		424483	A	G	C		1719204	C	T	N
	1588872	C	T	C		621797	G	T	N		924934	A	G	N		487470	G	A	N		204087	A	G	C		318552	A	T	C		424670	C	T	N		1719246	G	T	N
	1588996	C	G	C		622162	T	G	C		927276	T	C	C		487506	A	C	N		204276	A	G	C		318553	T	A	C		424886	T	C	C		1719252	T	A	N
	1589028	A	C	C		622176	A	G	C		928797	T	C	C		519366	G	A	C		204867	T	C	C		318555	A	T	C		434921	G	A	N		1719257	G	A	N
	1589249	C	T	C		622602	T	G	C		928913	G	A	C		539744	C	T	N		204945	G	A	C		318558	T	C	C		434947	G	C	N		1719296	A	C	N
	1590650	T	C	C		622623	C	T	C		928964	G	A	C		563396	T	C	N		204960	A	G	C		318559	T	C	C		434950	C	T	N		1719339	T	A	N
	1590857	T	C	C		630759	A	G	N		929850	G	T	N		563469	T	C	N		205135	A	G	N		318560	T	A	C		435083	A	G	N		1719423	T	C	N
	1591122	C	T	C		630785	T	C	N		930636	C	T	N		563659	C	T	N		205145	A	G	N		319429	T	A	N		435537	T	C	N		1719426	T	C	N
	1591214	C	T	C		630818	C	T	N		930655	T	C	N		564102	C	A	C		205325	C	T	N		319602	T	C	N		435667	T	C	N		1719441	A	G	N
	1591263	G	A	C		630940	A	G	N		930676	T	A	N		564269	G	A	C		205885	G	A	C		321126	G	C	C		435670	C	A	N		1719444	T	C	N
	1591311	C	T	C		631529	T	A	N		931648	A	T	N		571203	T	G	N		206566	C	T	C		321172	A	C	C		435690	A	C	N		1719451	C	T	N
	1591505	A	G	N		631881	C	A	C		931805	G	T	N		571272	G	A	N		206611	G	C	C		321913	G	A	N		435727	A	T	N		1719539	A	G	N
	1591528	T	C	N		633879	G	A	C		931828	A	G	N		573553	C	T	N		206773	A	T	C		322235	G	T	N		435875	T	C	N		1721779	T	C	N
	1592151	C	G	C		634077	T	C	C		932545	G	A	N		612022	A	G	N		206959	T	C	C		322252	C	A	N		436074	T	C	N		1721782	T	G	N
	1592535	G	T	C		634175	A	T	N		932640	T	C	C		670527	A	G	C		206965	T	C	C		322387	G	A	N		436082	C	T	N		1721784	G	A	N
	1594989	A	T	N		634365	C	T	N		932826	A	G	C		676370	G	A	C		207338	G	A	C		322489	T	A	N		436127	A	G	N		1721793	T	A	N
	1595044	T	C	N		634412	C	T	N		934144	G	T	N		695938	A	C	N		209533	G	A	C		322575	T	C	N		436249	A	C	N		1721794	C	G	N
	1595186	T	C	N		634439	A	T	N		934145	G	T	N		727837	G	A	C		209773	G	A	N		324619	T	A	N		436276	A	T	N		1721795	A	G	N
	1595205	A	C	N		634451	A	T	N		934303	C	T	N		728094	G	A	C		210158	A	G	N		324750	T	G	N		436385	T	A	N		1721796	C	G	N
	1595346	G	A	N		634470	C	A	N		934364	C	T	N		730662	C	T	N		210189	G	C	N		324768	T	C	N		436389	A	T	N		1721798	A	T	N
	1598510	A	T	N		634482	C	A	N		934478	G	T	N		734558	G	C	N		210237	A	G	N		324948	C	T	N		436526	C	T	N		1721801	A	G	N
	1599022	T	C	N		634733	T	A	N		935542	A	G	C		736564	C	T	N		210255	A	G	N		324952	C	T	N		436532	A	G	N		1721802	C	G	N
	1599058	G	T	N		634751	C	T	N		935928	T	C	C		736890	A	C	N		210265	A	T	N		325049	T	C	N		436534	T	G	N		1721805	G	A	N
	1599105	C	T	N		634836	C	T	N		936564	A	G	N		736899	C	T	N		210266	G	A	N		325083	G	A	N		436537	T	C	N		1721810	A	T	N
	1599112	G	T	N		635407	A	G	N		936580	C	T	N		736939	T	C	N		210281	G	A	N		325103	A	T	N		436559	T	G	N		1721811	A	T	N
	1599168	C	T	N		635529	T	C	N		936587	A	T	N		737064	A	G	N		210306	A	G	N		325220	G	A	N		436587	A	G	N		1721816	A	G	N
	1599202	G	A	N		635594	C	T	N		936603	G	A	N		737299	C	T	N		210335	G	T	N		325261	T	C	N		436613	G	A	N		1721817	G	A	N
	1599234	A	T	N		635656	C	G	N		936606	A	C	N		738197	T	C	N		210644	G	C	C		333690	T	A	C		436726	T	C	N		1721819	C	G	N
	1599274	G	A	N		635666	A	C	N		937077	C	T	C		738283	T	C	N		211449	T	C	C		340528	A	G	N		436852	T	C	N		1721820	T	A	N
	1599286	A	G	N		635672	A	T	N		938248	T	C	N		738308	A	G	N		211453	A	G	C		340552	C	T	N		436853	T	C	N		1721823	C	A	N
	1599290	C	T	N		635921	A	T	N		938265	A	G	N		738312	A	T	N		211614	A	T	C		340626	T	G	N		436952	G	C	N		1721825	G	A	N
	1599295	A	G	N		635978	A	G	N		938271	A	G	N		738329	T	C	N		212057	A	G	C		340692	G	C	N		436988	C	G	N		1721826	A	T	N
	1599349	A	G	N		636078	G	A	C		938272	A	G	N		738356	T	G	N		212269	C	G	N		341129	C	T	N		437009	G	A	N		1721827	G	T	N
	1599358	A	G	N		641635	C	G	N		938283	T	A	N		738374	C	T	N		212450	C	G	N		341133	T	A	N		437066	C	T	N		1721830	A	G	N
	1599414	A	C	N		641647	C	A	N		938288	C	T	N		738426	T	C	N		212490	C	T	N		341134	T	A	N		437117	T	G	N		1721831	G	T	N
	1599420	A	G	N		641732	C	T	N		938289	T	C	N		738599	A	T	N		212852	T	A	C		341218	T	C	N		437118	T	A	N		1721837	G	C	N
	1599449	T	C	N		641978	G	C	C		938308	C	G	N		738705	C	T	C		214089	T	C	N		341254	T	C	N		437161	C	A	N		1721845	C	T	N
	1599538	C	G	N		642302	A	G	C		938339	T	C	N		738707	A	G	C		214460	C	T	C		341807	A	G	C		437253	G	T	N		1721849	A	G	N
	1599592	T	A	N		642429	G	A	C		938358	A	G	N		750086	T	C	N		214564	A	G	N		342344	C	T	C		437256	A	T	N		1721852	A	G	N
	1599604	G	A	N		642458	C	A	C		938379	A	G	N		758587	A	G	C		214569	C	T	N		342356	A	G	C		437380	A	G	N		1721898	A	T	N
	1599628	A	G	N		643160	C	G	C		938380	A	G	N		779422	G	A	N		214571	A	T	N		342394	C	T	C		437382	A	G	N		1721977	G	A	N
	1599634	T	C	N		643695	A	G	C		938405	C	T	N		791706	G	A	N		214605	C	T	N		342782	G	C	C		437389	G	T	N		1721998	C	T	N
	1599643	G	T	N		643869	T	C	C		938438	T	C	N		791768	A	G	N		214616	G	T	N		343475	C	A	N		437396	C	A	N		1722000	A	G	N
	1599646	T	C	N		644154	G	A	N		938576	C	G	N		791773	A	G	N		214628	T	G	N		343497	A	G	N		437407	C	T	N		1722045	T	C	N
	1599647	C	T	N		644316	G	C	C		938584	T	C	N		791785	T	C	N		215799	G	A	N		343690	C	A	N		437560	A	T	N		1722061	G	T	N
	1599684	G	T	N		646553	T	G	N		938659	T	A	N		791827	C	A	N		215864	C	T	N		343835	G	A	N		437563	A	G	N		1722240	G	A	N
	1599808	C	A	N		647169	A	G	C		938715	T	C	N		792026	T	C	N		215866	C	T	N		343837	A	G	N		437567	G	T	N		1722446	A	G	N
	1599859	C	G	N		647480	A	G	C		938820	T	C	N		800414	T	C	C		215914	C	A	N		343904	A	G	N		437633	T	C	N		1724583	C	A	N
	1599867	C	G	N		652245	A	T	C		938918	C	T	N		822626	C	T	C		216015	A	G	N		344176	G	T	N		437692	T	G	N		1724716	T	C	N
	1600391	C	T	N		653388	G	A	C		938962	C	T	N		822767	T	C	C		216045	A	G	N		344199	G	A	N		437693	G	C	N		1725422	G	A	N
	1600446	T	G	N		654759	C	T	C		939014	G	T	N		822892	A	G	C		217479	C	A	C		344522	A	T	N		437694	G	A	N		1725479	C	T	N
	1600498	A	G	N		654966	G	A	C		939044	T	A	N		822985	A	C	C		222184	T	G	C		344767	G	A	N		437706	A	G	N		1725524	A	G	N
	1600534	G	C	N		655920	A	G	C		939063	C	A	N		823061	G	A	C		222345	G	A	C		344773	A	G	N		437714	T	A	N		1725617	C	A	N
	1600540	A	G	N		655941	A	G	C		939122	A	G	N		823077	A	G	C		222737	G	A	N		344838	C	T	N		437732	G	T	N		1725646	T	C	N
	1600541	G	T	N		658126	C	A	C		940706	C	A	C		823118	A	G	C		222895	T	C	N		345093	G	A	N		437758	G	A	N		1725784	G	A	C
	1600543	T	C	N		659445	A	C	C		940893	T	C	C		823120	A	G	C		222964	A	G	N		345164	G	T	N		438084	C	A	N		1726057	A	G	N
	1600550	C	T	N		661880	A	G	N		941354	T	A	C		823130	G	A	C		223042	G	C	N		345165	G	T	N		438235	T	C	N		1726059	T	A	N
	1600626	G	T	N		662322	A	T	N		941769	T	C	N		823150	A	C	C		223237	G	A	C		345180	G	A	N		438245	G	T	N		1727006	C	G	C
	1600635	C	G	N		662556	T	C	C		941775	A	C	N		823186	A	G	C		223697	C	T	C		345216	C	T	N		438291	C	T	N		1727262	A	G	C
	1600658	T	C	N		662619	G	A	C		941785	G	C	N		823248	G	A	C		223879	T	C	C		345369	G	A	N		438293	A	T	N		1727311	A	G	C
	1600691	A	G	N		662638	T	C	C		941823	T	C	N		823457	G	A	C		224453	C	T	C		345416	C	T	N		438332	A	T	N		1728141	A	G	C
	1600743	A	G	N		662691	G	T	C		942561	C	T	C		823569	A	G	C		224835	T	A	C		345656	T	C	C		438980	T	G	N		1728191	A	G	C
	1601219	C	A	N		662761	C	A	C		942624	A	G	C		824224	C	T	C		224869	A	G	C		352740	C	G	C		439052	A	G	N		1728595	C	G	N
	1601235	A	T	N		662988	C	T	C		943107	G	A	C		825224	C	T	C		224983	C	T	C		352882	T	A	N		439720	G	A	C		1728617	A	G	N
	1601876	T	A	N		663580	T	C	C		943539	C	T	C		825389	A	G	C		225165	G	C	C		352892	T	A	N		439729	T	C	C		1733393	T	C	C
	1601903	A	G	N		664182	A	T	N		943575	T	C	C		825758	C	T	C		225181	A	T	C		352893	T	A	N		440747	G	T	C		1733432	C	T	C
	1601990	G	C	N		664393	T	G	N		945570	C	G	C		826827	T	C	N		225659	G	A	C		352952	A	G	N		440812	C	T	C		1734464	A	T	C
	1602024	A	T	N		669603	A	G	N		946380	C	G	C		826856	G	T	N		231548	T	G	C		352959	A	C	N		441275	A	T	N		1734550	C	T	C
	1602259	G	A	N		669683	T	A	N		946611	A	G	N		826935	A	T	N		231626	G	T	C		353029	T	C	N		441531	T	C	C		1735125	C	T	N
	1602262	A	C	N		669988	C	A	N		946742	T	C	N		826944	A	G	N		231750	T	C	C		353032	C	T	N		443911	T	G	N		1735170	T	C	N
	1602376	T	C	N		670449	A	T	N		946750	T	C	C		827756	G	A	C		231861	C	T	N		353786	T	G	N		444002	A	G	N		1735585	G	A	C
	1602386	A	G	N		670470	T	C	N		947689	T	G	N		827759	A	G	C		231868	A	G	N		353789	T	C	N		444217	C	A	N		1736869	T	C	C
	1602695	G	A	N		670474	C	A	N		947702	T	A	N		828267	A	G	C		231952	C	T	N		353798	C	A	N		444977	A	G	C		1737402	A	G	N
	1602725	A	G	N		671264	C	T	C		947724	G	A	N		828656	A	G	C		232146	G	A	C		353800	C	T	N		445279	C	T	C		1737541	A	C	C
	1602870	C	T	N		672074	C	T	N		947726	A	C	N		828679	T	C	C		232281	T	C	C		353931	T	C	N		449024	T	C	N		1737562	T	C	C
	1602885	T	C	N		672398	A	T	N		947750	C	G	N		828702	G	C	C		232388	G	A	C		354344	A	C	C		450354	T	G	N		1738078	G	A	C
	1602902	A	G	N		672419	C	T	N		947884	A	T	N		828802	C	A	C		232466	G	T	C		354554	G	A	C		450462	G	A	N		1738108	A	G	C
	1602905	G	A	N		673156	G	A	C		950677	A	T	C		828811	A	G	C		233597	T	C	N		354864	G	A	C		451299	A	G	C		1738506	T	C	C
	1602909	C	A	N		673180	G	A	C		951363	A	G	C		828832	T	C	C		233634	T	G	N		355032	C	T	C		451487	C	T	C		1738666	G	C	C
	1602958	C	A	N		673210	A	C	C		952305	G	A	C		829744	G	A	C		233713	T	C	N		355212	G	A	C		451496	G	A	C		1738771	T	A	N
	1603039	C	T	N		676675	A	G	C		953017	G	T	N		830157	T	A	C		233786	C	T	N		355404	G	A	C		451791	A	T	C		1738841	T	A	N
	1603106	A	G	N		676678	T	A	C		955254	C	T	C		830350	A	G	C		233938	G	A	N		355686	T	C	C		452563	G	A	C		1739528	C	T	C
	1603130	C	T	N		676924	T	C	N		957276	A	C	C		830392	C	T	C		234041	A	G	N		355707	A	G	C		452595	C	T	C		1740529	G	T	C
	1603133	T	C	N		677182	A	G	N		957309	T	G	C		830794	T	C	C		234085	T	A	N		355815	T	A	C		452617	T	C	C		1742927	C	A	N
	1603142	C	T	N		677324	G	A	N		957510	T	C	C		830883	T	A	C		234125	T	C	N		355869	G	A	C		452621	A	G	C		1743020	G	A	N
	1603344	G	A	N		679510	G	A	C		957549	A	C	C		830920	T	A	C		234173	C	T	N		355917	T	A	C		452664	T	C	C		1743225	G	A	N
	1603347	G	A	N		679762	G	A	C		958128	A	C	C		830986	A	G	N		234420	G	A	N		356283	T	A	C		452787	T	C	C		1743261	T	A	C
	1603368	C	G	N		681219	A	G	C		964115	C	A	N		830993	G	A	N		234550	C	T	N		356916	T	C	C		452907	G	A	N		1743262	C	T	C
	1603403	A	T	N		681396	A	C	N		964119	T	A	N		831011	T	G	N		234846	G	A	N		356919	A	G	C		455014	G	C	N		1744003	C	T	C
	1604048	G	A	N		684181	T	C	C		964314	T	A	C		831028	A	G	N		234852	T	A	N		357032	T	A	C		455017	T	C	N		1744286	G	A	N
	1604158	C	T	N		685908	C	T	N		964348	A	G	C		831029	A	G	N		234951	T	C	C		357283	G	C	C		455073	C	T	N		1744330	T	C	N
	1604207	T	C	N		686590	C	T	C		964750	T	C	C		831211	C	T	N		234961	T	C	C		359490	C	T	C		455541	C	T	C		1744429	C	T	N
	1604285	A	C	N		686771	C	A	C		964828	T	G	C		831224	T	C	N		235853	C	A	C		359643	G	A	C		459184	A	G	N		1744430	C	T	N
	1604922	T	C	N		686973	T	C	N		964901	C	A	C		831227	G	A	N		235873	C	T	C		359709	T	C	C		469375	T	C	N		1744497	T	C	N
	1605361	G	A	N		686991	A	G	N		965114	A	T	C		831235	A	T	N		236120	A	C	C		359804	A	G	C		473706	G	A	C		1744692	C	G	N
	1605495	G	A	N		689433	G	A	N		965614	C	T	C		831341	A	C	C		236239	G	T	C		360339	T	C	C		473714	A	T	C		1744713	A	G	N
	1605711	T	C	N		689512	C	A	N		966691	C	G	C		831416	T	A	C		237232	A	G	C		361131	G	A	C		473748	A	G	C		1744874	T	G	N
	1605770	C	T	N		691161	G	A	C		966743	A	C	C		831439	C	T	C		237650	A	G	C		362034	T	C	C		473766	G	A	C		1745379	A	C	C
	1605771	G	T	N		691574	A	G	C		967131	T	G	C		831450	C	G	C		237769	C	T	C		362043	A	T	C		473849	A	C	C		1745403	C	T	C
	1606228	A	T	N		691901	G	A	C		967372	A	G	C		831477	A	G	C		238093	G	A	C		362238	A	G	C		474009	A	G	C		1745507	T	C	N
	1606229	A	T	N		692440	T	C	C		967385	C	T	C		831543	C	T	C		238934	A	G	C		362240	A	G	C		474258	T	C	C		1745511	C	T	N
	1606405	A	G	N		692564	G	A	C		968299	A	G	C		831579	A	G	C		239057	T	A	C		362493	T	A	C		474852	T	C	C		1745516	C	G	N
	1606422	T	C	N		692630	C	T	C		970120	A	G	C		831608	G	A	C		261290	T	A	N		362708	A	T	N		475008	G	A	C		1746405	C	T	N
	1606423	C	T	N		695972	G	A	C		970341	A	C	C		831615	G	A	C		261380	T	G	N		362918	A	T	N		475096	C	G	C		1746536	G	C	C
	1606521	T	C	N		696089	G	A	C		971960	G	T	N		831736	G	A	C		261422	T	C	N		363376	G	A	N		475195	G	A	C		1746896	A	C	C
	1606625	C	T	N		697037	T	C	C		972674	A	G	C		834276	A	G	N		265604	G	A	C		363471	T	A	N		475299	T	C	C		1747118	G	A	C
	1606679	G	A	N		697357	C	T	C		972679	A	G	C		834319	T	C	N		265639	T	C	C		363630	T	C	N		475566	T	C	C		1748408	A	C	N
	1606680	T	C	N		699749	G	A	N		973851	T	C	C		834343	G	A	N		267271	A	G	C		363680	T	C	N		475599	T	C	C		1748613	C	G	N
	1606687	C	A	N		700319	C	T	C		973907	T	G	C		834358	T	A	N		267480	A	G	C		363696	C	T	N		475604	T	C	C		1748681	G	A	C
	1606778	A	C	N		700469	T	C	C		973993	G	C	N		837746	C	T	C		267501	G	T	C		363770	G	A	N		475621	A	G	C		1749787	T	A	N
	1606787	T	C	N		700604	A	G	C		974029	A	G	N		838013	T	C	C		267753	T	G	C		363791	T	C	N		475662	G	A	C		1764111	C	G	C
	1606788	T	C	N		700726	C	G	C		974044	A	T	N		838107	T	A	C		267865	T	C	C		363803	C	T	N		475680	C	A	C		1764511	A	G	N
	1606835	G	A	N		700819	G	A	C		974110	T	C	N		839264	T	C	N		268630	T	C	C		363877	T	A	N		475791	G	A	C		1764512	G	A	N
	1607179	G	C	N		701396	T	G	C		974114	T	A	N		839455	T	C	N		268637	G	A	C		363881	A	T	N		476264	A	G	N		1765713	A	G	C
	1607301	A	C	N		701564	T	C	C		974521	G	A	C		839526	T	C	N		268786	G	A	C		363893	A	G	N		476544	C	A	C		1766036	G	C	C
	1607378	G	T	N		701961	G	A	N		974556	T	C	C		839587	T	C	N		268823	T	C	N		363973	G	C	N		476617	G	A	C		1766119	A	G	N
	1607518	A	G	N		702039	G	A	N		974792	G	C	C		839723	A	G	N		268948	A	G	N		364056	G	C	N		476704	C	T	C		1768681	C	T	C
	1608355	C	T	N		702255	G	A	C		974914	G	A	C		839736	C	A	N		286335	A	T	N		364141	C	T	N		476713	C	T	C		1768684	G	A	C
	1608651	A	T	N		702555	A	G	C		975035	A	G	N		839772	G	A	N		286364	A	G	C		364369	T	C	N		476819	T	C	C		1769083	A	T	N
	1611558	T	C	N		703045	G	T	C		975118	G	A	N		839786	G	A	N		289345	G	A	N		364515	A	G	N		477124	C	A	N		1769114	G	A	N
	1613094	C	T	C		704626	C	T	N		975133	G	A	N		846843	G	A	N		293493	T	C	N		364777	T	A	N		477154	G	A	N		1769192	A	C	N
	1614086	A	T	N		705092	A	C	C		975165	C	T	N		846847	A	G	N		293945	C	T	C		365032	T	C	N		477162	C	G	N		1769295	C	T	N
	1614088	T	A	N		705287	T	G	C		975290	T	C	N		846855	A	G	N		294259	T	A	C		365156	T	C	N		477513	C	T	C		1769436	T	C	C
	1614613	C	G	C		705383	G	A	C		975302	G	A	N		847051	C	T	N		294542	C	G	C		365227	C	T	C		477614	T	G	N		1770660	T	C	C
	1614650	T	C	C		709116	T	C	N		975319	T	G	N		847106	C	T	N		294809	G	A	C		365276	C	T	C		477616	G	A	N		1770957	C	T	C
	1614889	A	G	C		711265	T	C	C		975327	C	T	N		847166	A	C	N		294836	C	T	C		366365	C	T	C		477636	A	G	N		1771062	T	C	C
	1615042	G	T	C		711355	A	T	C		975386	A	G	N		847191	A	T	N		294905	G	A	C		366524	T	C	C		477915	G	A	C		1772029	T	A	C
	1615372	G	A	C		711370	A	G	C		975573	G	A	N		847714	C	T	N		294969	A	G	C		366725	T	C	C		478131	C	T	C		1772961	T	C	C
	1615687	A	G	C		711866	A	G	C		975595	C	T	N		848253	A	G	N		295006	G	A	C		367034	G	T	C		478289	G	A	C		1773569	G	T	N
	1615981	A	G	C		713881	A	G	C		975736	T	A	N		848255	T	C	N		295235	T	C	C		367154	G	C	N		478540	A	G	N		1774159	C	T	C
	1616209	A	G	C		714346	G	A	C		975795	A	G	N		848323	G	A	N		295277	C	T	C		367304	C	G	C		478743	T	C	N		1774246	C	T	C
	1616620	A	G	C		714376	C	T	C		975806	C	T	N		849161	T	C	N		295388	A	C	C		367818	T	A	C		478745	A	C	N		1774662	T	C	C
	1617626	T	C	C		714454	G	A	C		990748	A	G	N		849231	T	A	N		295853	T	C	C		368338	A	G	C		478899	T	A	N		1775152	G	A	N
	1617949	A	T	N		716542	A	T	N		990773	C	T	N		849239	G	A	N		297155	C	G	N		368495	G	A	N		479573	A	G	C		1775574	T	C	C
	1618002	C	A	N		717626	C	T	C		991162	G	A	N		849291	T	A	N		297330	T	A	N		368640	A	G	N		479617	C	T	C		1776912	A	T	N
	1618167	C	T	N		718011	T	C	C		991177	G	A	N		849409	G	A	N		297338	T	A	N		368812	C	T	C		479680	C	T	C		1787667	G	T	N
	1618203	G	A	N		718580	G	A	N		991178	C	T	N		849426	G	A	N		297374	C	T	N		368991	T	C	C		480412	T	A	N		1787861	T	C	C
	1618337	T	A	N		721396	G	A	C		991198	T	C	N		849446	C	A	N		297629	T	G	N		369132	T	G	C		480415	T	A	N		1788578	G	A	C
	1618338	G	T	N		721598	C	T	C		991350	A	G	N		849465	T	A	N		297959	A	T	N		370761	A	C	C		480430	A	T	N		1788676	A	C	C
	1618357	A	C	N		721648	G	T	C		991388	A	G	C		849492	A	G	N		298066	A	C	N		370990	G	A	N		480498	G	A	N		1788903	G	T	C
	1618538	A	T	N		724637	T	G	C		991445	T	C	C		849539	A	C	N		298110	G	A	N		371184	A	G	N		480599	G	A	C		1788920	T	A	C
	1618564	T	C	N		724639	A	C	C		991538	C	T	C		849601	C	G	N		298149	A	C	N		371300	A	G	N		480613	G	A	C		1790127	C	T	C
	1618565	T	A	N		725011	C	T	C		991907	C	A	N		849604	T	C	N		298162	A	T	N		371611	G	T	N		481216	C	T	C		1790247	A	G	C
	1618595	T	A	N		725104	C	T	C		1027219	C	T	C		849645	G	C	N		298333	C	T	N		371621	A	T	N		481218	C	T	C		1790283	C	T	C
	1618852	T	C	N		725248	T	C	C		1033467	G	A	N		850373	C	T	N		298712	C	T	N		371644	C	G	N		481252	A	G	C		1790452	A	G	C
	1621831	T	A	C		725380	A	G	C		1148070	C	T	C		850378	A	T	N		298884	A	G	N		371735	C	G	N		481526	C	A	C		1790818	C	T	C
	1622078	T	C	C		725416	A	G	C		1161162	A	T	N		850398	C	G	N		299057	T	A	N		371751	T	A	N		482032	A	G	C		1791769	C	T	N
	1622156	G	A	C		725449	G	A	C		1161174	A	G	N		850491	T	G	N		299058	C	T	N		371788	A	C	N		482431	A	G	C		1792254	T	C	C
	1622451	A	C	C		725830	G	T	N		1166241	A	C	N		850559	T	C	N		308758	C	T	N		371799	A	G	N		482586	A	G	C		1792263	A	G	C
	1622548	C	G	C		725847	G	A	N		1173238	C	A	N		850694	T	A	N		308782	A	G	N		371843	A	C	N		482764	A	C	N		1792890	G	A	C
	1622555	C	T	C		725888	G	A	N		1173322	C	T	N		850895	C	T	N		308790	G	A	N		371914	C	T	N		482813	C	T	C		1793094	G	A	C
	1622667	G	A	C		725953	T	A	N		1173404	C	T	N		850897	T	C	N		308799	C	T	N		372899	G	A	C		483111	T	C	C		1793115	C	T	C
	1622849	C	T	C		726296	A	T	C		1175632	G	A	N		850898	T	A	N		308838	T	G	N		376150	T	C	N		483129	T	C	C		1793154	G	C	C
	1623206	A	C	N		726340	C	G	C		1274972	A	C	N		850900	G	T	N		308866	T	A	N		376234	G	C	N		483480	G	A	N		1793841	C	T	C
	1623207	A	G	N		726974	C	T	N		1338312	T	C	N		850941	T	A	N		315277	C	T	N		376717	G	A	N		483568	T	C	N		1794390	G	A	C
	1623209	A	C	N		727076	A	T	N		1338468	A	T	N		851010	G	A	N		315433	G	A	N		377002	C	T	N		483615	C	A	N		1794546	T	A	C
	1623215	C	A	N		732149	C	T	C		1338470	A	C	N		851099	A	T	N		332790	G	A	C		377262	G	A	N		483651	C	A	N		1796972	A	G	C
	1623217	G	A	N		734610	C	A	N		1414060	G	A	N		851151	T	C	N		332808	A	G	C		377333	C	T	N		483828	C	G	C		1798271	A	G	C
	1623232	T	C	N		735690	C	T	C		1418967	C	T	C		851155	C	T	N		332811	G	A	C		377474	G	A	N		483841	C	A	C		1798345	C	A	C
	1623544	C	T	C		735774	C	T	C		1473812	T	C	N		851206	T	A	N		332993	G	A	C		377722	A	T	N		483874	T	C	C		1798724	A	G	C
	1623570	C	A	C		737912	T	C	C		1646498	G	A	C		851332	T	C	N		332999	G	A	C		377759	C	A	N		483877	G	A	C		1799306	A	G	N
	1623904	G	A	C		737928	T	C	C		1824186	A	C	N		851824	C	T	N		333000	G	A	C		378205	G	A	N		484441	T	A	C		1799409	C	T	N
	1633039	T	C	N		737929	T	C	C							851943	C	T	N		333460	T	C	N		378301	C	T	N		484484	G	C	C		1799418	T	C	N
	1633093	A	G	N		738758	A	G	N							852109	T	C	N		333485	G	A	N		378521	A	G	N		484644	T	C	C		1799456	G	T	N
	1633573	C	A	C		738804	C	T	N							852132	C	T	N		333492	A	G	N		378522	A	G	N		484682	G	A	C		1799533	T	G	N
	1633590	C	G	C		738884	C	A	N							852147	G	A	N		333614	G	A	N		379434	A	G	C		485899	G	T	C		1799657	A	T	N
	1646619	C	T	C		738885	T	C	N							852358	A	T	N		333676	A	G	N		380072	A	G	N		485937	G	A	N		1800509	G	A	N
	1648444	C	T	N		738887	A	C	N							877823	C	A	N		333764	G	A	N		387469	T	C	C		486009	C	T	C		1801189	A	T	N
	1694440	A	T	N		739074	G	A	N							881401	A	G	N		333788	A	G	N		387497	T	C	C		486123	G	A	C		1801191	G	T	N
	1738589	A	G	C		739080	G	T	N							884349	A	C	C		333948	G	T	N		387535	G	A	C		486135	C	T	C		1801229	G	A	N
	1739787	C	T	N		739136	C	T	N							884579	A	G	C		333995	C	T	N		392190	A	C	C		486678	G	A	C		1801338	G	T	N
	1761264	A	C	C		739248	A	G	N							885314	C	A	N		337543	G	A	C		392217	C	T	C		487349	T	A	N		1801455	A	T	N
	1804509	T	C	C		739262	G	A	N							886773	A	G	N		340042	T	C	N		394246	G	A	C		487397	A	T	N		1801668	A	T	N
	1806267	C	T	C		739302	T	C	N							886790	A	T	N		340431	G	A	C		394318	G	A	C		488199	T	C	C		1802137	C	T	C
	1807849	G	A	C		739395	T	A	N							887074	T	A	N		341414	T	C	C		394319	G	A	C		488569	T	A	C		1802141	G	C	C
	1812556	G	A	C		739475	T	G	N							887118	G	A	N		341708	A	T	N		394376	A	G	C		488663	C	A	C		1802894	T	C	C
	1812709	G	A	C		739685	T	G	N							888344	C	T	N		341858	T	C	N		394496	T	C	C		489088	T	C	C		1802939	G	A	C
	1818772	A	C	N		739713	G	A	N							888349	T	A	N		341878	C	T	N		394794	T	G	C		492134	G	A	C		1802990	T	C	C
	1842237	A	G	C		739714	T	A	N							888370	T	C	N		342049	A	G	N		394813	G	A	C		495016	A	T	N		1803170	T	C	C
	1857907	G	A	C		739752	T	C	N							888587	G	A	C		342060	C	G	N		394875	C	G	N		495074	T	A	N		1804382	A	G	C
	1859681	C	T	N		739914	C	T	N							888773	T	C	C		342079	A	G	N		395211	G	T	C		495210	T	C	N		1805755	G	A	C
	1879419	C	T	C		739931	T	G	N							888866	T	C	C		342183	C	T	N		395322	G	A	C		495337	A	G	N		1805794	T	C	C
	1936708	C	A	C		739962	C	T	N							889251	A	G	C		343762	A	T	N		395415	T	C	C		495457	G	C	N		1805934	G	A	C
	1948549	A	G	N		740089	G	A	N							889276	C	T	C		343853	C	T	C		395469	T	C	C		495573	T	A	N		1805947	T	G	C
	2018625	A	C	N		740123	T	C	N							889298	A	T	C		348760	C	A	C		395539	G	A	C		496419	G	A	C		1806307	C	T	C
	2113509	A	G	N		740224	G	A	N							889650	G	T	C		348970	A	G	C		395717	T	C	C		496422	G	T	C		1806459	A	C	C
	2142464	C	T	C		740336	C	A	N							889651	T	C	C		349081	G	A	N		397228	G	T	C		496428	A	G	C		1806602	A	G	C
	2239825	G	A	C		740392	G	T	N							889653	A	G	C		349417	T	G	N		397385	C	G	C		496437	T	G	C		1806638	T	C	C
	2272314	G	A	N		740458	G	A	N							889762	A	G	C		349493	T	C	N		397558	C	T	C		496492	T	C	C		1806759	C	T	C
	2284832	T	G	N		740665	A	C	N							889781	C	T	C		349570	A	T	N		397669	A	G	C		496527	G	A	C		1806870	G	A	C
	2286397	G	A	C		742378	A	T	N							889857	T	A	C		349603	C	T	N		397722	G	T	C		496551	G	T	C		1806877	G	A	C
	2346059	A	G	N		742485	T	C	N							889973	G	A	C		350448	C	T	C		398097	A	G	N		496682	C	A	C		1813409	A	G	C
	2398876	C	T	C		742537	C	T	N							889994	G	A	C		350628	T	C	N		399961	A	G	C		497178	C	T	C		1813912	C	T	N
	2844541	G	A	N		742578	C	T	N							889997	C	A	C		350633	A	G	N		400471	C	A	N		498337	A	C	N		1813922	T	C	N
	2973712	C	A	N		742590	T	G	N							890003	T	C	C		352708	G	C	C		402064	A	G	C		498338	A	T	N		1814048	G	A	N
	2988793	C	T	N		742599	A	G	N							890145	A	G	C		353492	A	G	C		402689	A	G	C		498504	T	C	N		1820117	T	A	N
	3001783	C	T	C		744109	T	G	N							890193	G	A	C		353576	A	G	C		402939	A	T	N		498584	A	T	N		1821827	T	G	C
	3042509	C	T	C		744116	T	A	N							891127	C	A	C		353785	C	T	N		402962	G	A	N		498848	T	C	C		1823726	A	G	C
	3084800	G	A	N		744135	C	T	N							891128	A	T	C		354120	C	T	N		403024	T	C	N		498886	A	C	C		1828634	C	T	N
	3084931	G	A	N		744428	A	G	N							891130	C	A	C		354189	G	A	N		403093	G	A	N		499543	C	T	C		1828635	C	T	N
	3085073	G	A	C		744451	A	T	N							891181	C	T	C		354197	G	A	N		403161	G	A	N		499573	C	T	C		1831044	G	A	C
						744532	A	G	N							891263	T	C	C		354202	T	G	N		403181	A	T	N		499578	C	T	C		1831116	C	T	C
						744553	C	G	N							891266	T	C	C		354423	C	T	N		403198	T	C	N		500545	T	A	C		1831794	A	G	C
						744594	G	T	N							891272	A	T	C		354531	G	T	N		403428	G	A	N		500588	G	A	C		1832319	G	A	C
						744730	C	T	N							893341	T	C	C		354559	C	G	N		405516	C	T	C		500716	G	A	N		1832356	C	T	C
						744742	T	C	N							893603	T	C	N		354563	C	T	N		405621	G	A	C		500721	A	G	N		1832942	T	C	C
						744762	A	G	N							893618	C	G	N		354620	C	T	N		406208	A	G	N		500862	C	T	N		1833209	A	G	C
						744772	G	A	N							893626	T	A	N		354642	G	C	N		408638	T	C	C		500867	G	A	N		1833340	G	A	C
						744913	T	C	N							893735	A	G	N		354653	A	G	N		408741	G	A	C		500899	G	A	N		1833404	A	G	C
						745390	A	C	N							893758	C	T	N		354654	T	C	N		412374	T	C	N		501042	T	G	N		1834205	T	C	C
						745500	A	G	N							893774	T	C	N		354755	T	A	N		412498	A	T	N		501065	G	A	N		1834539	A	G	N
						745913	C	T	N							893802	C	G	N		354830	G	A	N		412539	G	T	N		501145	T	C	N		1834625	T	G	N
						746719	T	A	N							893806	G	T	N		354831	C	T	N		413890	T	C	C		501204	A	C	N		1834749	G	T	N
						746882	T	C	N							893817	T	A	N		354834	T	C	N		413903	A	T	C		501225	C	T	N		1834923	G	A	N
						747770	G	A	C							893821	A	G	N		355283	G	A	N		414339	A	G	C		501246	G	A	N		1834925	A	C	N
						747915	A	G	C							894038	T	C	N		355286	G	A	N		414396	C	T	C		502249	G	T	N		1835869	T	C	C
						747945	A	G	C							894146	C	T	N		355318	G	A	N		414422	G	C	C		503384	G	A	C		1836014	G	A	C
						748608	C	T	C							894174	A	T	N		355372	C	T	N		414460	G	A	C		503788	G	A	C		1836636	T	C	C
						748844	C	G	N							894235	A	G	N		355376	G	T	N		414778	A	G	C		504148	G	A	N		1836900	G	A	C
						749154	A	T	N							894239	G	A	N		355377	G	T	N		414811	T	G	C		504400	G	A	N		1836996	A	G	C
						749406	G	A	N							894240	G	A	N		355417	G	A	N		414905	C	G	C		504403	G	A	N		1838482	C	T	C
						749536	A	T	N							894278	T	C	N		355422	G	A	N		414983	G	A	N		505374	C	T	N		1839142	C	T	C
						749616	T	G	N							894332	C	A	N		355470	A	G	N		415151	A	G	N		506195	A	C	C		1839280	G	A	C
						757368	C	T	C							894429	C	T	N		355547	C	G	N		415925	A	T	C		506273	C	A	C		1851832	G	A	C
						757381	T	C	C							894496	A	C	N		355796	C	T	N		417442	G	T	N		506274	A	G	C		1851970	A	G	C
						757382	G	A	C							894561	T	A	N		355952	G	A	N		417511	T	C	N		506279	C	T	C		1865586	G	C	N
						757531	G	A	C							894629	C	T	N		356038	G	A	C		417626	G	T	N		506284	T	C	C		1868152	G	A	N
						757734	A	G	C							894634	G	C	N		356041	G	A	C		417693	T	A	N		506285	A	C	C		1883812	C	T	N
						758031	T	A	N							895759	T	C	C		356342	G	A	C		418030	G	A	N		506291	T	C	C		1883830	C	T	N
						758575	A	G	C							895762	A	T	C		356472	T	A	C		418036	A	T	N		506296	T	C	C		1884280	T	G	N
						759238	G	C	C							896045	G	A	C		356949	C	T	C		418037	A	T	N		506298	A	G	C		1973085	T	G	N
						759304	T	C	C							896239	A	G	N		357833	A	G	N		418230	G	A	C		506303	T	C	C		1976412	G	A	N
						759575	G	A	C							897531	G	T	N		358198	C	G	N		418713	C	T	C		506349	A	G	C		1979747	G	A	N
						759619	G	A	C							897751	T	A	N		359026	A	T	N		418731	T	C	C		506366	T	A	C		2062327	A	T	N
						759757	T	C	C							897777	A	C	N		359138	C	T	N		419155	A	T	N		506374	A	G	C		2062332	A	T	N
						760012	G	A	C							897806	T	C	N		359478	C	A	N		419528	T	A	N		506377	T	G	C		2062337	A	T	N
						761269	C	T	N							898456	T	C	C		359485	C	A	N		421562	T	C	C		506664	G	C	C		2062342	A	T	N
						761289	C	T	N							898471	A	G	C		359574	C	T	N		422167	T	G	N		506670	T	C	C		2062347	A	T	N
						761353	A	G	N							898641	G	A	N		359633	T	C	N		429849	G	T	C		506761	C	T	C		2071686	G	A	N
						761591	C	T	C							899007	T	C	C		359823	T	C	C		429913	G	A	C		506764	G	A	C		2155054	G	A	C
						761891	T	A	C							907490	G	A	N		360371	G	A	C		429954	G	A	C		507636	A	T	N		2199892	A	T	N
						762750	T	A	N							907542	A	G	N		360381	C	G	C		430204	A	C	N		507652	T	C	N		2199894	A	G	N
						763264	C	T	C							907708	G	C	N		363658	T	G	C		430205	T	A	N		507680	T	C	N		2199896	A	C	N
						763461	G	T	C							907760	T	C	N		364581	G	A	N		434387	C	T	C		507688	A	G	N
						763556	C	A	C							907767	G	T	N		364610	G	T	N		434655	C	A	N		507775	G	T	N
						763633	A	G	N							907777	A	G	N		364699	C	T	N		434782	A	C	N		507776	C	T	N
						763879	A	G	N							907818	A	T	N		364771	A	G	N		434821	A	T	N		507781	A	T	N
						763938	G	A	N							907836	C	T	N		364817	T	G	N		438907	C	G	N		507790	G	T	N
						763939	A	T	N							907848	T	C	N		365238	C	T	C		439001	A	G	C		507851	T	G	N
						763953	C	T	N							908645	A	T	N		365382	T	A	C		439539	T	C	N		507864	A	T	N
						764187	C	T	N							910062	C	T	C		367115	A	G	C		445371	A	C	N		507910	A	G	N
						765878	C	A	C							910065	A	C	C		367264	A	C	C		445435	C	T	N		507938	G	A	N
						767497	T	C	C							910108	A	G	C		368734	T	C	C		445570	T	G	N		507963	A	C	N
						767757	T	G	N							910133	T	C	N		369601	T	C	C		446705	C	T	N		507972	C	T	N
						767846	A	G	N							910161	T	G	N		369920	T	A	N		446721	G	A	N		507999	A	G	N
						767965	A	T	N							910210	C	A	N		369944	A	T	N		455965	T	C	C		508015	A	G	N
						768161	C	A	N							910539	T	A	N		369994	A	G	N		456378	C	T	C		508435	C	T	N
						768436	C	T	N							910560	A	T	N		370003	G	C	N		459028	A	G	C		508929	C	T	N
						769547	A	G	N							910620	A	G	N		370063	A	T	N		460037	T	C	C		508954	T	C	N
						770901	A	G	C							910645	G	C	N		370257	C	T	N		460424	A	G	C		509062	T	C	C
						770965	G	A	C							910705	A	G	N		370298	C	G	N		460447	G	A	C		509294	A	G	C
						770969	G	A	C							910708	G	T	N		371232	T	C	C		463941	C	T	C		509494	A	C	N
						771990	A	G	C							910843	A	G	N		371728	C	T	C		464091	A	G	C		509612	T	C	N
						772284	T	A	C							910871	G	T	N		371755	A	G	C		464277	G	A	C		509618	T	A	N
						772746	A	C	N							910879	G	A	N		372245	G	T	C		465318	A	G	C		509639	A	G	N
						772777	G	A	N							910923	C	A	N		372412	A	G	C		465759	C	T	C		509694	T	C	N
						773481	G	A	C							911050	G	A	N		372454	C	T	C		465876	G	A	C		509911	A	C	N
						775207	C	T	N							911052	G	A	N		372508	A	G	C		466598	G	A	N		510341	C	T	N
						775209	C	T	N							911069	A	G	N		372544	T	A	C		466620	C	T	N		510351	A	C	N
						775233	C	T	N							911258	G	A	N		372550	C	T	C		466660	G	C	N		510365	G	A	N
						775256	T	C	N							912400	A	C	N		372737	C	T	N		466827	C	T	N		510605	T	C	N
						775270	A	C	N							912614	T	C	N		372785	A	C	N		467104	T	C	C		510659	C	T	N
						775275	C	A	N							912618	G	T	N		372814	C	T	N		467182	C	A	C		510683	C	T	N
						775372	G	A	N							912640	G	T	N		372822	T	C	N		467398	G	A	C		510689	C	T	N
						775387	T	A	N							912665	A	T	N		372955	A	G	N		467520	C	A	N		510794	A	T	C
						775467	T	C	N							912971	C	T	C		373895	G	A	C		467668	T	C	N		512014	C	T	C
						775481	G	A	N							913497	A	G	N		373997	G	A	C		467781	G	A	N		512125	G	C	C
						775579	T	C	N							913649	C	T	N		374249	A	G	C		467852	T	C	N		512174	G	A	C
						775624	G	A	N							918265	T	C	N		376188	C	T	C		468808	G	A	C		512212	C	T	C
						775678	T	C	N							918379	A	G	N		376195	G	A	C		468926	C	G	C		512385	T	A	N
						775835	C	T	N							918394	A	G	N		376368	G	A	C		469219	A	G	N		512389	T	C	N
						775852	A	T	N							918459	T	C	N		376558	T	C	C		469312	A	G	N		512439	C	T	N
						775864	A	G	N							918579	A	T	N		376981	T	C	C		469708	T	A	N		512466	A	G	N
						775880	T	G	N							918587	C	T	N		377243	C	A	C		470032	G	A	N		512484	A	G	N
						775892	A	G	N							918641	T	C	N		377251	T	C	C		470349	A	G	N		512751	A	G	N
						775925	T	C	N							918644	G	A	N		377548	T	A	N		470368	T	A	N		512763	A	G	N
						775954	T	C	N							918747	A	T	N		379128	A	G	C		470424	G	A	N		512801	A	T	N
						776271	T	C	N							918845	T	C	N		383970	T	C	N		470451	T	C	N		512805	T	C	N
						776566	T	A	C							918967	A	G	N		384082	T	C	N		470482	T	C	N		512855	C	T	C
						777496	G	A	C							918975	A	G	N		385490	G	A	C		470496	C	T	N		512894	T	C	C
						786363	A	G	C							919002	C	T	N		386476	T	C	N		470518	T	C	N		512929	T	C	C
						786381	T	C	C							919161	G	A	N		395773	C	T	N		470525	A	C	N		513142	T	A	C
						793825	T	A	N							919200	T	G	N		395802	A	G	N		470579	T	C	N		513307	A	G	C
						793855	G	T	N							919289	G	T	N		395875	T	A	N		470591	T	C	N		513361	A	T	C
						793959	A	C	N							920118	A	G	C		395942	G	T	N		470685	G	A	N		513365	T	G	C
						794169	A	T	N							920173	T	C	C		396325	T	A	C		470686	T	C	N		513405	G	A	C
						794937	G	A	C							920267	T	A	N		396387	T	A	C		470688	C	G	N		513609	G	T	C
						795848	C	T	N							920290	C	A	N		396407	G	T	C		470750	G	A	N		513901	T	C	C
						795888	G	A	N							920298	G	A	N		396409	T	A	C		470761	T	C	N		514216	A	T	C
						795905	A	T	N							920447	T	G	N		396551	A	C	C		470893	A	C	N		514871	T	A	C
						796179	T	C	C							920518	A	C	N		396569	T	A	C		470933	G	A	N		514877	T	A	C
						796209	A	G	C							920523	T	G	N		396859	C	A	C		470991	A	T	N		514887	C	T	C
						796215	T	C	C							921050	A	T	C		397030	C	T	C		470992	A	G	N		514919	G	A	C
						796255	C	T	C							921151	T	C	C		397231	C	A	C		471004	T	C	N		514996	G	C	N
						796329	C	A	C							921494	C	T	C		397238	A	G	C		471066	T	G	N		515008	C	G	N
						796416	G	A	C							921511	A	C	C		397263	G	A	C		471137	G	C	N		515101	C	T	N
						796749	A	G	C							922982	T	A	C		397421	T	C	C		471199	A	G	N		515327	A	G	C
						797018	C	T	C							923009	A	G	C		397502	C	T	C		472862	C	T	N		515460	A	G	C
						797484	T	C	C							923121	T	A	C		397547	A	G	C		473153	A	G	N		515461	G	A	C
						797932	G	A	C							923233	C	T	C		397613	C	T	C		473279	C	T	N		515476	A	C	C
						798109	T	C	C							923773	A	T	N		397997	A	G	C		473313	C	T	N		515665	C	T	C
						798747	A	G	C							923811	A	T	N		398047	G	A	C		473395	T	C	N		516029	A	G	C
						798914	A	T	N							923812	T	G	N		402344	G	T	C		473640	T	C	N		516353	T	C	N
						799435	C	T	N							923854	A	T	N		402386	G	T	C		473642	T	C	N		516361	G	T	N
						799537	T	A	N							923859	C	A	N		402394	A	C	C		473944	C	T	N		516371	A	G	N
						799571	A	C	N							923965	A	G	N		402492	G	A	C		473948	A	G	N		516801	C	G	N
						799712	C	A	N							924029	T	G	N		402494	A	C	C		473985	G	T	N		516934	G	C	N
						799887	G	C	C							924104	T	C	N		402915	A	G	C		474024	G	C	N		517315	C	T	N
						799969	G	A	C							924152	A	G	N		403020	A	T	C		475761	G	A	N		517407	A	G	N
						799990	G	A	C							924166	G	T	N		403139	A	G	C		475806	A	C	N		517469	T	C	N
						800003	G	A	C							924168	G	A	N		403184	G	A	C		475851	T	G	N		517473	C	T	N
						800008	A	G	C							924238	T	A	N		403228	G	C	C		475855	T	C	N		517484	C	T	N
						800013	G	A	C							924329	C	T	N		403231	G	C	C		475880	G	A	N		517558	A	C	N
						800054	T	C	C							924379	T	A	N		403280	A	T	C		475955	C	A	N		517634	C	A	N
						800370	C	A	C							924455	A	C	N		403281	T	C	C		476003	C	T	N		517670	G	T	N
						800746	T	C	C							924507	C	T	N		404428	A	G	N		476031	C	T	N		517671	C	T	N
						800780	G	A	C							924565	A	G	N		404616	A	T	N		476287	G	T	N		517673	T	A	N
						800827	T	G	C							924568	G	T	N		404620	G	T	N		476408	G	A	C		517679	T	A	N
						801090	C	T	C							924579	C	T	N		404632	T	C	N		476648	A	G	C		517755	A	T	N
						801105	T	C	N							924682	C	G	N		404643	G	A	N		476867	A	C	C		518050	A	G	C
						801122	C	T	N							924746	T	C	N		404682	G	T	N		477521	G	C	C		518536	C	T	C
						801176	G	A	N							924795	C	T	N		404683	G	A	N		477900	G	A	C		521850	G	A	C
						801229	T	G	N							924857	A	T	N		404726	T	A	N		479388	C	T	N		521865	C	T	C
						801263	T	A	N							924892	A	C	N		404753	A	T	N		480689	A	T	N		522993	G	A	C
						801555	A	G	N							924963	A	T	N		404890	G	A	N		480717	C	G	N		523363	G	C	C
						802362	C	T	C							924967	C	A	N		404924	C	T	C		484603	C	T	C		523426	G	A	C
						802707	A	G	C							925043	G	T	N		405119	C	T	C		484939	A	G	C		523932	G	A	C
						802740	A	G	C							926212	G	A	N		405479	T	G	C		484989	A	C	C		523998	T	C	C
						802854	A	G	C							926272	A	G	N		405682	A	T	N		485056	C	T	C		524013	T	C	C
						803340	G	C	C							926295	C	T	N		405683	A	T	N		485223	C	A	C		524103	C	A	C
						803406	G	T	C							926380	C	T	N		405866	T	C	N		485915	C	A	N		524157	A	T	C
						803640	A	G	C							926736	G	A	N		405945	T	C	C		486166	T	C	N		524238	G	A	C
						804153	G	A	N							926741	C	T	N		405975	G	A	C		486454	G	A	N		524247	G	A	C
						804234	A	G	N							929724	T	C	N		407064	G	A	C		486482	G	A	N		524265	A	G	C
						804827	A	G	C							929726	A	G	N		407759	G	A	N		487615	C	T	C		526637	T	G	N
						810873	C	T	N							929910	G	A	N		407861	G	T	N		488324	C	A	N		526648	A	T	N
						810902	T	C	N							930099	A	G	N		407862	G	T	N		488349	C	T	N		526679	T	A	N
						811020	T	C	N							930100	T	C	N		407863	G	T	N		488441	T	A	N		526776	C	T	N
						811404	C	T	N							930174	C	T	N		408066	C	T	N		488493	G	A	N		527103	G	A	C
						812287	G	A	N							931004	T	A	C		409440	G	A	N		488500	C	G	N		527432	G	A	C
						812413	A	G	N							931010	A	T	C		409552	A	G	N		488766	G	A	C		527971	A	G	C
						816343	A	T	N							931011	A	T	C		409553	G	A	N		488799	T	C	C		528173	G	A	C
						816551	C	T	N							931062	A	T	C		409554	G	A	N		488816	A	G	C		528807	G	A	C
						816755	A	G	N							931065	T	A	C		409555	G	A	N		488877	A	G	C		529061	C	T	C
						816814	C	T	N							931773	C	T	C		409599	T	G	N		489076	G	A	C		529152	G	A	N
						817146	A	G	C							931790	T	C	C		409677	C	T	N		489245	G	T	C		529578	C	T	N
						821968	C	T	N							932028	T	A	C		409687	T	C	N		489425	T	G	C		531075	C	T	N
						822035	A	G	N							932177	G	C	C		409729	G	A	N		489810	C	T	C		531541	G	A	N
						822131	T	C	C							932201	G	T	C		409761	T	C	N		492778	G	T	C		531664	A	T	N
						822863	A	G	C							932379	G	A	C		409881	T	C	N		492797	T	G	C		531679	T	C	N
						822953	C	T	C							932394	C	A	C		409922	C	T	N		492800	G	T	C		532107	A	G	C
						823377	G	A	C							932400	C	A	C		410035	T	C	N		492816	T	C	C		535535	A	C	N
						824064	T	C	C							932410	C	T	C		410087	C	T	N		492861	T	C	C		536338	T	G	C
						824456	T	C	C							932584	A	G	C		410091	T	G	N		493618	G	T	C		536389	A	G	C
						825833	C	T	C							932637	G	A	C		410103	T	C	N		493651	G	A	C		537770	C	T	C
						825951	G	A	C							932640	C	A	C		410137	T	C	N		493654	A	G	C		537980	G	A	C
						826477	T	A	C							932687	G	A	C		410197	A	T	N		493711	A	G	C		538209	A	G	C
						826489	T	C	C							932749	T	C	C		410199	C	T	N		493717	A	G	C		538709	C	T	C
						829928	A	C	C							932792	C	T	C		410203	C	G	N		493720	A	G	C		538720	A	G	C
						830986	T	C	N							932823	T	G	N		410205	C	T	N		493746	A	C	C		538761	T	G	N
						831009	G	T	N							932962	G	A	N		410206	C	T	N		493771	T	A	C		538837	A	T	N
						831637	G	A	C							933010	G	A	N		410208	T	A	N		494352	T	G	C		538864	A	G	N
						833323	G	A	C							933059	G	A	N		410563	G	A	C		494356	G	A	C		539385	G	A	C
						833341	C	T	C							933097	A	T	N		410971	C	T	C		494358	T	G	C		539624	A	G	N
						834052	C	T	N							933165	A	G	N		411204	G	T	C		494359	G	A	C		539625	G	T	N
						834702	A	G	N							933170	T	C	N		411356	G	A	C		494364	T	G	C		540524	G	A	C
						834718	C	T	N							933183	T	A	N		411778	G	A	C		494365	A	G	C		540981	A	G	C
						834760	C	A	N							933235	C	T	N		411891	A	C	C		494374	G	A	C		540985	A	G	N
						834802	A	G	N							933337	A	C	N		412728	A	G	N		494380	A	G	C		541447	G	T	N
						834870	A	G	N							933705	G	A	N		413319	T	G	N		494389	A	G	C		541615	C	T	N
						834878	A	T	N							933706	T	A	N		414057	G	A	N		494613	G	A	C		541737	A	G	C
						835134	G	A	N							933736	T	G	N		414113	T	G	N		494773	A	T	C		542185	G	C	C
						835220	A	G	N							934239	A	T	N		414116	G	A	N		495010	A	G	C		542307	A	G	C
						835585	A	G	N							934338	A	G	N		414134	C	T	N		495024	G	T	C		542378	G	T	C
						835613	A	G	N							934341	A	T	N		414148	A	G	N		495025	A	T	C		542541	C	T	C
						835639	T	C	N							934417	A	C	N		414175	C	G	N		495072	C	T	C		542638	T	G	C
						836102	C	T	N							934516	G	A	N		414329	T	C	N		495218	G	A	C		543606	C	T	C
						836428	T	C	N							934760	A	G	C		414709	T	C	N		495271	T	C	C		543711	C	A	C
						837993	C	A	C							934789	G	C	C		415159	G	C	N		495295	T	C	C		543781	A	G	C
						838008	G	T	C							935566	C	T	C		415198	A	G	N		496050	C	T	N		544281	A	T	C
						838150	C	A	N							935953	C	T	C		415211	C	G	N		496067	G	T	N		544554	T	C	C
						838175	A	G	N							936024	G	A	N		415502	G	A	N		496450	A	G	N		544752	G	A	C
						838248	C	T	N							936107	C	T	N		415569	T	A	N		496469	C	T	N		544776	A	G	C
						838275	C	G	N							936563	G	A	C		415600	A	G	N		496502	C	A	N		544817	C	A	C
						838324	C	T	N							936739	T	C	C		415647	T	A	N		496504	G	A	N		544935	C	T	C
						838433	T	G	N							936772	A	T	C		415680	G	A	N		496582	A	T	N		544985	C	T	N
						838566	C	T	N							937065	T	C	C		415720	G	A	N		496639	A	C	N		544995	T	C	N
						838591	C	T	N							937147	T	A	C		415740	A	T	N		496670	C	A	N		545000	T	C	N
						838592	G	C	N							937481	A	G	C		415741	T	C	N		496799	A	T	N		545040	A	T	N
						838700	A	C	N							937741	C	T	C		415821	A	G	N		496856	G	T	N		545073	A	G	N
						838751	A	G	N							937833	A	G	C		415829	G	A	N		497065	G	A	N		545563	T	A	C
						838788	A	G	N							938051	A	T	N		415842	G	A	N		497293	G	A	N		546064	G	A	N
						838829	G	A	N							938053	T	A	N		415857	C	T	N		497310	G	A	N		546076	A	G	N
						839017	G	C	N							938055	T	A	N		415900	A	G	N		497449	A	T	N		546077	A	G	N
						839021	T	C	N							938111	A	T	N		416052	A	T	N		497534	C	A	N		546135	G	T	N
						839027	C	T	N							939957	C	T	C		416233	A	G	N		497566	G	T	N		546136	A	G	N
						839044	G	A	N							940176	A	G	C		416729	C	T	N		497569	G	T	N		546137	A	G	N
						839045	C	T	N							940332	G	A	C		416877	C	T	C		497578	A	T	N		546284	G	A	N
						839047	T	C	N							940411	T	G	N		417191	A	G	C		497680	A	G	N		546297	T	C	N
						839137	T	C	N							940413	C	T	N		417288	A	G	C		497943	G	C	N		546298	C	A	N
						839503	G	A	N							940450	T	A	N		417399	T	C	C		498001	C	T	N		547496	G	A	C
						839516	G	A	N							940453	C	G	N		417405	C	T	C		498304	T	C	N		547502	A	G	C
						839971	G	C	N							940528	G	A	N		417438	C	T	C		498326	A	T	N		547504	G	A	C
						840395	T	A	N							940662	A	G	N		417513	G	A	C		498692	G	C	N		547527	A	G	C
						840432	T	C	N							941113	T	A	N		417636	T	C	C		498694	A	C	N		547531	A	G	C
						840448	G	T	N							941114	A	G	N		420944	C	A	C		498749	C	T	N		547695	T	A	C
						840538	A	C	N							941175	G	A	N		420957	A	T	C		498827	A	T	N		547697	T	G	C
						840603	C	T	C							941277	G	C	N		420960	T	A	C		498912	T	A	N		547715	C	T	C
						840739	C	T	C							941415	C	T	N		420975	G	A	C		498924	A	G	N		547764	G	T	C
						841071	C	G	C							941444	T	C	N		421196	A	C	C		499029	G	C	N		547888	C	T	N
						853443	C	A	C							942676	T	G	C		421378	C	T	C		499097	G	T	N		547943	G	A	N
						854429	A	G	C							942679	T	C	C		433147	T	C	N		499194	G	A	N		547954	G	C	N
						910296	T	C	C							944461	T	C	C		439584	T	G	C		499198	G	A	N		547974	T	A	N
						910345	G	A	C							944559	T	G	C		442752	G	T	N		499267	A	T	N		548045	G	T	N
						910624	T	A	C							945106	C	T	C		453135	C	T	C		499271	G	A	N		548047	A	T	N
						910976	G	A	N							945210	G	A	C		453246	G	A	C		499272	C	T	N		548098	T	C	N
						911232	C	T	C							945400	C	G	C		453398	A	G	C		499275	T	C	N		556183	A	T	N
						911302	C	T	C							945502	C	T	C		453657	T	C	C		499278	C	T	N		559693	T	C	C
						911594	C	T	C							945778	G	A	C		453690	C	T	C		499300	G	T	N		560804	T	C	N
						911610	G	A	C							945846	G	A	C		453994	G	T	C		499510	A	C	N		560827	G	A	N
						914603	C	T	N							945904	G	A	C		454116	T	A	C		499558	G	A	N		560931	C	T	N
						915504	T	C	C							945946	T	A	C		454200	C	T	C		502089	T	A	N		560936	A	T	N
						915738	G	A	C							946072	T	C	C		454521	A	T	N		502095	T	A	N		560968	C	T	N
						916134	C	T	C							946294	A	G	C		454525	C	T	N		502848	C	T	N		561032	C	T	N
						924681	G	T	N							946300	C	T	C		454786	G	A	C		502857	C	T	N		561042	A	T	N
						925524	G	A	C							946363	C	T	C		454807	G	A	C		502915	C	T	N		561051	T	A	N
						932145	A	G	N							948134	T	C	C		454876	C	T	C		503151	A	C	N		561129	T	G	N
						932165	C	A	N							948361	C	T	C		454897	A	T	C		503158	T	A	N		561154	G	A	N
						932166	T	G	N							948396	T	C	C		455442	G	A	N		503534	C	T	C		561195	C	T	N
						932168	G	A	N							948412	A	G	C		455812	A	G	C		503582	G	A	C		561218	G	A	N
						932209	G	A	N							948567	G	C	C		458036	C	T	N		504653	A	G	N		561268	T	C	N
						932241	G	A	C							949316	T	C	C		458740	A	G	C		504654	G	T	N		561359	T	A	N
						932265	T	C	C							951062	C	A	C		459052	G	A	C		504656	C	T	N		561596	T	C	N
						932378	T	G	C							951530	C	T	C		459460	A	G	C		504677	A	T	N		562144	A	G	C
						932493	A	G	C							951602	G	A	C		462087	T	A	C		504678	G	T	N		562688	T	C	C
						932530	G	A	C							951619	C	T	C		463469	C	T	C		504683	C	T	N		562713	T	C	C
						932856	T	C	C							951803	A	G	C		463520	T	G	C		504685	G	T	N		574751	C	T	N
						933320	G	A	C							951837	G	A	N		463538	A	G	C		504686	A	T	N		574826	A	T	N
						933343	C	T	C							951848	T	G	N		463624	T	C	C		504714	T	C	N		574889	A	G	N
						933489	A	G	C							951871	A	T	N		463743	C	A	C		504863	A	T	N		574959	T	G	N
						933630	T	C	C							952327	C	T	C		463931	T	G	C		504882	G	A	C		575006	T	G	N
						933638	A	G	C							952495	G	A	C		463949	C	A	C		504920	C	T	C		575327	T	G	N
						933745	A	G	C							952831	G	A	C		464708	G	A	C		506467	G	A	N		575721	C	T	N
						933890	C	G	N							952954	T	G	N		464882	T	C	N		506879	C	T	N		575977	T	G	N
						933905	G	T	N							953081	C	A	N		467267	C	T	C		506913	G	A	N		576227	C	G	N
						934376	A	G	N							953112	C	T	N		467270	C	T	C		507093	A	T	C		576451	T	C	N
						934453	A	G	N							953219	G	A	N		467300	C	T	C		507204	C	T	C		630033	T	A	N
						934499	C	A	N							953357	C	G	N		467827	G	A	N		507422	A	G	C		630410	A	G	N
						934548	T	C	N							953401	T	C	N		467894	T	C	N		507514	G	T	N		630524	C	T	N
						934579	C	T	N							953517	C	T	N		468204	C	T	N		507526	C	A	N		630737	T	C	N
						934870	A	G	C							953869	G	A	N		468536	G	C	C		507618	T	C	N		630817	G	T	N
						934994	A	G	C							953958	A	G	N		468608	G	A	C		507642	T	C	N		631013	A	C	N
						935053	C	T	C							954030	A	T	N		468665	A	G	C		507859	T	A	C		651462	A	G	C
						935242	T	C	C							954075	G	A	N		473446	A	G	N		508090	C	T	C		652372	C	T	N
						935290	C	T	C							959052	A	G	C		475819	A	G	C		508537	C	T	C		652375	C	T	N
						937418	T	C	C							959109	A	T	C		476161	A	G	N		508637	G	A	C		677925	C	T	C
						937475	T	C	C							959424	T	A	C		476185	T	A	N		508771	A	T	C		687059	T	C	C
						937523	C	T	C							959564	C	T	N		476189	G	A	N		509501	T	C	C		703775	C	T	N
						938005	T	A	N							960218	C	T	N		476798	C	T	N		509829	A	T	C		717740	G	A	C
						938244	A	T	N							960229	T	C	N		476802	A	G	N		509877	A	T	C		742889	G	T	N
						938390	C	T	N							960236	C	T	N		477108	T	C	N		509991	T	A	C		815952	C	T	N
						938464	T	G	N							960373	G	A	C		477522	C	A	N		510024	G	A	C		858548	C	T	C
						938480	T	C	N							960809	A	G	C		477594	C	G	N		510163	C	T	C		986485	C	T	N
						938588	G	T	C							960839	G	A	C		477843	T	A	N		510186	A	T	C		986502	C	T	N
						938684	T	C	C							960954	G	A	N		477892	T	C	N		510520	G	A	C		995380	A	C	N
						938697	G	T	C							960961	A	G	N		478151	A	G	N		512381	C	T	N
						938720	T	C	C							960977	A	G	N		478164	G	A	N		512421	G	A	N
						938752	T	C	C							961050	T	C	N		478339	T	G	N		512423	G	A	N
						938759	T	G	C							961148	G	A	N		478438	C	T	N		512434	G	A	N
						938770	C	A	C							961158	C	G	N		478441	C	T	N		512479	A	G	N
						938790	A	T	C							961254	C	G	C		478587	A	T	N		513276	C	T	C
						938792	T	G	C							961434	A	T	C		479006	G	A	C		513403	A	G	C
						938904	T	C	N							961840	T	C	N		479176	C	T	C		513537	T	C	C
						939193	C	T	N							963617	C	T	C		479331	T	C	C		513945	C	T	C
						939194	T	G	N							965574	G	A	C		479738	C	T	C		513957	G	A	C
						939230	A	T	N							965689	C	T	C		480669	A	G	C		514222	C	T	N
						939267	G	A	N							965739	C	T	C		480717	A	G	C		514490	A	C	N
						939454	T	C	N							965779	G	T	C		480838	C	T	C		514535	A	G	N
						939638	C	T	N							966096	G	A	C		480909	C	T	N		514579	G	A	N
						939992	G	A	N							966371	G	C	C		481006	T	C	N		514695	G	A	N
						940685	T	C	C							966402	G	A	C		481104	G	C	N		514737	A	T	N
						941138	A	C	C							966518	C	A	N		481145	A	T	N		514822	A	G	N
						951770	T	A	N							966529	T	A	N		485128	G	A	C		514840	A	G	N
						951773	C	A	N							966532	T	C	N		485333	C	G	N		514919	A	G	N
						951910	G	A	N							966543	A	C	N		485505	T	C	N		514955	T	A	N
						951920	C	T	N							966857	A	G	N		485906	G	T	C		514957	A	T	N
						952044	A	T	C							966916	A	G	N		486420	T	C	C		514959	A	C	N
						952065	T	C	C							967886	A	G	N		486623	C	T	C		514960	A	T	N
						952071	T	C	C							967902	T	A	N		486699	T	C	C		514965	T	A	N
						952141	A	G	C							968037	C	A	N		486917	T	G	C		514966	T	A	N
						953239	A	T	N							968222	G	A	N		486942	C	T	C		514968	T	A	N
						953294	T	A	N							968236	T	G	N		487018	G	A	C		514969	T	A	N
						953451	C	T	C							968264	A	T	N		487892	T	C	C		515145	C	T	C
						953478	C	T	C							968360	C	T	N		489569	A	T	C		515529	A	G	C
						953479	C	T	C							968507	A	G	N		489683	G	C	C		515700	C	T	C
						953495	G	A	C							968616	A	G	N		489685	G	A	C		515934	A	G	C
						953724	G	A	C							968764	G	A	N		490142	C	T	C		516238	C	T	N
						953750	A	T	C							968767	A	G	N		490364	C	G	C		516434	A	C	N
						953759	G	A	C							968829	C	T	N		490478	C	A	C		516448	T	A	N
						953930	A	C	C							969432	T	A	N		490515	T	G	C		517026	C	T	C
						953932	C	T	C							975376	C	T	N		490532	G	T	N		521495	T	C	N
						954168	T	A	N							975500	T	A	N		490918	T	C	C		521667	T	A	N
						954398	C	A	N							976951	A	C	N		490927	A	G	C		521838	A	G	N
						954750	C	T	C							977398	A	T	N		491068	G	A	C		522010	C	T	N
						954839	G	A	C							977486	A	G	N		491153	T	C	C		522032	G	C	N
						954957	G	A	C							978570	G	A	C		492052	C	T	C		522059	T	C	N
						954996	A	C	C							978573	T	G	C		492265	T	C	C		522061	C	A	N
						955044	A	G	C							978603	T	A	C		492339	C	T	C		522227	G	A	C
						958799	C	A	C							978789	C	T	C		492529	T	C	C		522305	T	C	C
						958827	A	G	C							979083	A	G	C		492556	G	A	C		522398	G	A	C
						958889	C	A	C							979308	A	G	C		492609	G	T	C		522693	G	A	C
						958994	A	G	N							979329	A	T	C		492616	A	G	C		522959	T	A	N
						958995	A	G	N							979660	C	T	C		492636	T	C	C		523992	G	A	C
						959087	A	G	N							979752	C	T	C		492718	G	A	C		524155	G	T	C
						959200	T	G	N							979830	T	C	C		492879	G	C	N		524167	G	T	C
						959534	A	G	N							979845	A	T	C		492880	A	G	N		524238	T	C	C
						959548	T	A	N							979986	T	A	N		492952	G	A	N		524327	G	A	C
						959585	A	T	N							980533	G	A	N		492974	G	T	N		524388	T	G	C
						963087	T	A	C							980574	A	T	N		492984	G	A	N		524467	A	G	C
						963093	A	T	C							980645	T	C	N		493034	C	T	N		528004	T	C	C
						963096	G	A	C							980655	T	C	N		493065	T	C	N		528115	A	G	C
						963252	G	A	C							980691	T	A	N		493104	C	A	N		528133	T	A	C
						963469	A	C	N							980770	C	T	N		494501	T	C	N		528142	G	A	C
						963490	G	T	N							980830	G	A	N		495625	C	A	N		528145	C	T	C
						963788	C	T	N							980943	C	T	N		495692	T	C	N		528310	T	A	C
						964061	C	T	C							981000	A	G	N		495735	G	A	N		528642	A	G	N
						964257	T	A	C							981176	C	T	C		495749	C	T	N		528694	A	G	C
						964483	A	G	C							981229	T	A	C		495857	G	A	N		528827	T	C	C
						965117	C	T	N							981750	C	G	N		495918	T	C	N		528911	C	A	C
						965128	A	G	N							981771	C	T	N		495922	C	T	N		529001	G	A	C
						965132	G	A	N							981851	A	T	N		495943	A	T	N		529173	C	T	C
						965625	C	T	N							981852	C	T	N		495964	T	C	N		529237	T	C	C
						965646	A	G	N							981880	C	T	N		495967	A	G	N		529332	G	A	C
						965660	T	C	N							981893	T	A	N		495968	A	T	N		529377	A	T	C
						965676	C	T	N							981894	T	C	N		495977	T	C	N		529456	G	A	N
						965899	A	G	N							981952	C	T	N		496046	A	T	N		529587	A	T	N
						965932	T	A	N							982075	T	C	N		496072	C	A	N		529591	G	A	N
						965957	C	T	N							982118	T	C	N		496086	T	C	N		529602	C	T	N
						967781	A	G	N							982159	A	G	N		496113	A	G	N		529942	T	A	N
						967786	A	T	N							982241	A	G	N		496122	T	C	N		529949	T	C	N
						967865	A	G	N							982270	T	C	N		496139	G	A	N		529950	G	T	N
						967925	T	C	N							982282	A	C	N		496177	C	A	N		529951	G	T	N
						973050	A	G	C							982283	C	T	N		496196	G	C	N		529952	A	T	N
						973250	A	G	C							982284	G	T	N		496204	G	A	N		529958	A	T	N
						973640	A	C	C							982285	C	T	N		496225	T	C	N		529959	A	G	N
						973774	T	A	C							982288	C	A	N		496275	C	T	N		529960	A	G	N
						973782	C	G	C							982294	T	C	N		496311	T	A	N		529962	C	G	N
						973794	G	A	C							982311	A	C	N		496644	C	G	N		532938	G	A	N
						973796	A	T	C							982386	G	A	N		496654	A	C	N		533141	C	T	N
						973797	G	A	C							982435	G	A	N		496658	T	A	N		533239	C	T	N
						973799	T	A	C							982486	G	A	N		496661	G	A	N		533338	G	A	N
						973802	T	A	C							982491	C	A	N		496697	G	A	N		533598	C	T	N
						974952	A	G	C							982505	G	T	N		496698	T	A	N		547219	T	C	C
						974970	C	T	C							982555	G	A	N		496721	A	C	N		547299	C	G	C
						975233	T	A	C							982610	A	G	N		496771	T	A	N		547920	C	T	C
						975282	A	G	C							982648	T	C	N		496775	T	A	N		551402	C	G	C
						975292	T	C	C							982657	A	T	N		496788	T	C	N		552656	C	T	C
						975319	G	A	C							982664	T	C	N		496798	A	C	N		552728	T	A	C
						975352	G	A	C							982671	C	T	N		496807	C	T	N		552857	A	G	C
						975442	G	A	C							982673	G	A	N		496808	A	G	N		552872	C	T	C
						975445	C	A	C							982674	A	G	N		496816	T	C	N		553091	G	A	C
						975446	C	T	C							982675	A	C	N		496830	G	A	N		553127	G	A	C
						975449	C	T	C							982678	G	T	N		496834	C	T	N		556385	C	T	N
						975451	A	C	C							982684	A	G	N		496864	C	A	N		556410	C	T	N
						975452	T	C	C							982690	A	G	N		496920	G	A	N		556546	A	G	C
						975455	T	C	C							982697	C	T	N		496929	T	A	N		556558	C	T	C
						975457	C	A	C							982699	T	G	N		496947	A	C	N		556603	G	A	C
						975458	G	T	C							982717	A	C	N		496955	C	T	N		560207	G	A	N
						975461	C	T	C							982719	T	C	N		496958	T	A	N		560221	T	C	N
						975467	T	C	C							982721	A	T	N		496967	A	T	N		560285	G	A	N
						975478	G	C	C							982723	T	C	N		496997	T	A	N		560288	G	A	N
						975487	A	G	C							982735	A	T	N		496998	G	A	N		560308	A	G	N
						982026	G	A	N							982741	C	A	N		497010	C	T	N		560328	A	G	N
						1008970	G	A	C							982750	A	C	N		497012	C	T	N		560331	T	C	N
						1009003	G	T	C							982756	G	A	N		497028	T	C	N		560339	T	C	N
						1009384	T	A	C							982766	G	A	N		497033	C	G	N		560368	C	T	N
						1009405	G	A	C							982767	C	T	N		497041	T	G	N		560409	G	A	N
						1009468	A	T	C							982771	G	A	N		497049	T	C	N		560462	A	T	N
						1009474	A	G	C							982777	C	T	N		497067	A	T	N		560559	T	A	N
						1009724	G	A	C							982794	A	C	N		497074	G	C	N		560803	A	G	N
						1010187	G	A	C							982795	T	C	N		497084	T	C	N		561256	G	A	N
						1012789	C	T	N							982798	A	G	N		497108	A	G	N		561283	A	G	N
						1012862	C	G	C							982812	A	T	N		497116	C	A	N		561365	A	G	N
						1013019	C	T	C							982820	C	T	N		497117	G	A	N		564362	T	C	N
						1013436	A	G	C							982822	A	G	N		497126	A	C	N		564363	T	C	N
						1013544	A	G	C							982829	T	G	N		497151	T	C	N		564601	T	G	N
						1013888	T	C	C							982830	C	T	N		497154	A	G	N		564645	C	T	N
						1015057	T	C	C							982834	C	A	N		497160	C	A	N		564837	A	C	N
						1015141	A	G	C							982840	A	G	N		497170	C	A	N		564973	G	T	N
						1015648	A	G	C							982841	A	C	N		497174	C	T	N		565013	G	A	N
						1015717	G	A	C							982843	A	T	N		497183	G	A	N		565933	C	G	N
						1015774	G	A	C							982852	C	A	N		497184	G	A	N		570162	C	T	C
						1015806	G	A	C							982857	A	C	N		497216	T	A	N		570183	T	C	C
						1015848	G	A	C							982858	T	C	N		497225	C	G	N		570267	G	A	C
						1015849	T	G	C							982876	T	C	N		497234	A	G	N		570365	T	A	N
						1015939	A	T	C							982877	C	A	N		497235	A	T	N		570911	C	T	N
						1016076	T	C	N							982893	G	C	N		497260	G	T	N		571071	A	G	N
						1016103	A	G	N							982897	C	T	N		497261	G	C	N		571304	T	C	N
						1016121	T	G	N							982943	C	T	N		497299	T	A	N		581593	T	C	C
						1016266	G	A	C							983170	T	C	N		497313	G	T	N		581959	C	T	C
						1016271	C	T	C							983418	A	C	N		498354	A	G	N		586682	C	G	N
						1016275	C	G	C							983419	A	C	N		498363	T	C	N		587627	A	G	N
						1016280	A	G	C							983565	C	T	N		498367	T	C	N		587863	T	C	C
						1016452	A	C	C							983583	T	C	N		498372	C	T	N		588277	G	A	C
						1016767	T	A	C							983738	A	G	N		498406	A	G	N		588287	T	C	C
						1016842	T	C	C							983786	A	G	N		498448	T	G	N		588393	T	C	C
						1017419	A	G	C							990596	C	T	N		498508	A	G	N		589074	G	A	C
						1017983	A	T	C							990599	G	A	N		498513	T	C	N		589143	C	T	C
						1018676	G	C	N							990600	G	A	N		498516	T	C	N		590542	G	A	C
						1018932	A	G	N							990748	C	T	N		498517	G	A	N		590926	G	A	N
						1019254	A	G	N							990808	T	C	N		498530	G	A	N		590961	A	G	N
						1019377	G	A	N							990862	G	A	N		498535	C	G	N		591007	A	G	N
						1019424	A	G	N							990883	T	A	N		501709	A	G	C		591062	G	A	N
						1019856	G	A	C							990972	T	A	N		518566	A	C	C		591066	A	T	N
						1020538	G	A	C							990973	G	A	N		519571	T	C	C		591104	T	C	N
						1020547	G	A	C							990974	T	C	N		520584	T	A	N		591232	A	C	N
						1020650	C	T	C							991406	G	A	C		520675	A	G	N		591290	C	T	C
						1021500	C	T	C							991462	A	G	C		520732	T	C	N		591305	G	T	C
						1021547	T	G	C							991525	T	C	C		520872	A	G	N		591348	C	T	C
						1021561	T	G	C							992011	T	A	C		520889	A	G	N		593654	A	G	C
						1021598	G	A	C							992477	A	G	C		520938	A	G	N		593766	A	G	C
						1021713	G	A	C							992902	C	T	C		521014	T	G	N		594713	A	G	C
						1021737	G	A	C							993263	C	T	C		521038	T	C	N		609439	G	A	C
						1022231	C	T	C							993523	T	C	C		521094	G	A	N		609632	T	G	C
						1022623	G	T	C							993577	G	A	C		521095	G	A	N		609706	T	C	C
						1022656	A	G	C							994075	T	A	C		521100	T	C	N		609794	C	T	C
						1023268	T	C	C							994453	C	G	C		521377	C	T	N		610018	A	G	C
						1023534	T	C	C							994498	G	A	C		521411	G	A	N		610162	T	A	C
						1024095	A	G	C							995146	G	A	C		521484	A	G	N		610204	A	G	C
						1024179	G	T	C							995156	T	G	C		521528	C	T	N		611791	A	G	C
						1030799	C	T	C							995395	C	T	N		521569	T	C	N		611989	C	G	C
						1033854	A	T	N							995455	G	T	N		521614	A	T	N		612123	C	T	C
						1033909	A	G	N							995738	A	G	N		521715	G	A	N		612396	G	A	N
						1034065	T	A	N							997840	C	T	C		521822	T	A	N		612440	C	T	N
						1034272	C	T	N							998654	G	A	N		521848	C	T	N		612444	T	A	N
						1034514	C	T	N							999222	C	A	C		521880	T	A	N		612487	C	T	N
						1034664	A	G	N							1001141	G	A	C		521942	C	T	N		612865	A	G	C
						1036393	G	A	N							1001488	A	C	C		522091	C	A	N		613033	A	G	C
						1038730	G	A	C							1001844	A	G	C		522162	G	A	N		613047	C	T	C
						1038826	C	T	C							1002198	C	A	C		522466	C	T	N		616585	C	T	C
						1038856	C	A	C							1003103	A	G	C		522513	A	G	N		616802	T	C	C
						1039045	A	G	C							1003456	A	G	C		522573	G	A	N		617743	G	T	C
						1039069	G	A	C							1003999	C	T	C		522627	T	C	N		618059	A	G	C
						1039354	T	C	C							1004289	C	T	C		522634	T	C	N		619470	G	T	N
						1039442	T	C	C							1005327	A	G	C		522670	C	T	N		619529	C	T	N
						1040731	G	A	C							1012245	T	G	N		522702	C	A	N		619575	G	A	N
						1041735	C	A	N							1012264	C	T	N		522943	T	C	N		619654	T	G	N
						1042732	G	A	C							1012416	C	T	N		522948	T	C	N		619723	T	G	N
						1043978	A	G	N							1012549	G	A	N		523039	G	C	N		619808	T	C	N
						1044085	T	C	N							1015037	A	G	N		523050	C	A	N		619809	A	T	N
						1044515	A	G	N							1016635	G	T	C		523183	A	G	N		619927	C	T	N
						1044581	T	C	N							1017979	A	T	N		523218	G	A	N		620525	C	T	N
						1044587	C	T	N							1018872	T	A	N		523232	A	T	N		620546	G	A	N
						1055558	T	A	C							1020433	A	G	C		523247	G	T	N		620658	T	A	N
						1055729	G	A	C							1022530	T	A	C		523386	C	T	N		620842	T	C	N
						1055801	T	C	C							1022645	A	G	C		523387	C	T	N		620896	A	G	N
						1056311	T	C	C							1022916	G	A	C		523411	C	T	N		620940	G	T	N
						1061818	T	C	C							1025255	C	T	C		523447	A	G	N		621007	A	G	N
						1062015	A	T	N							1025598	G	A	C		523448	T	C	N		621144	T	A	N
						1062072	T	G	N							1026044	G	A	C		523549	A	T	N		621279	A	G	N
						1062743	C	T	C							1027090	G	A	C		523569	T	C	N		621312	C	T	N
						1063160	T	C	C							1027471	T	C	N		523598	G	T	N		621351	G	C	N
						1063403	T	C	C							1027830	C	T	N		523603	T	A	N		622572	A	G	C
						1063994	T	C	C							1027955	G	T	N		523706	C	G	N		622575	G	A	C
						1064105	T	C	C							1028068	T	A	N		523737	A	G	N		622598	T	C	C
						1064153	T	A	C							1028075	G	A	N		523789	C	T	N		624624	C	T	C
						1065605	G	A	C							1028145	C	T	N		523933	C	T	N		624734	G	T	C
						1065680	C	A	N							1028153	G	A	N		523955	A	C	N		624765	G	A	C
						1066247	T	C	C							1028195	T	C	N		524044	A	T	N		629366	G	C	N
						1066276	A	G	C							1028269	A	C	C		524069	A	G	N		629382	T	C	N
						1066672	C	T	C							1028433	T	A	C		524084	A	T	N		629679	T	A	N
						1070855	A	G	N							1028438	G	A	C		524205	C	T	N		630182	G	A	C
						1070884	A	G	N							1028772	C	T	C		524236	G	T	N		630204	C	T	C
						1071087	C	T	C							1028864	A	G	C		524245	C	A	N		633192	T	C	C
						1071117	C	T	C							1029062	A	G	N		524269	A	G	N		633228	T	G	C
						1071311	A	G	N							1029128	C	T	N		524695	C	T	N		636314	G	A	N
						1071376	C	T	N							1029292	T	C	N		524704	A	T	N		636337	A	G	N
						1071389	C	G	N							1029569	A	G	N		524851	T	A	N		636441	A	G	C
						1072077	C	T	C							1029653	T	A	N		524893	G	T	N		636489	G	T	C
						1072270	C	T	C							1029690	G	A	N		524995	C	A	N		636513	A	G	C
						1072294	G	A	C							1029715	C	T	N		525010	G	C	N		636687	A	G	C
						1072544	A	C	N							1029765	G	A	N		527374	A	C	N		636890	C	T	C
						1072730	C	T	C							1029775	G	A	N		527395	T	C	N		637149	T	C	C
						1072957	C	A	C							1029787	T	A	N		527410	A	G	N		637158	G	A	C
						1073117	T	C	C							1029819	T	G	N		527562	C	T	N		637473	C	T	C
						1073122	C	T	C							1029829	A	G	N		527615	G	A	N		637539	G	A	C
						1073268	A	G	C							1029835	C	A	N		527733	T	C	N		637626	G	A	C
						1077652	G	A	C							1029875	C	T	N		527884	A	G	C		637845	A	G	C
						1077985	C	T	N							1030374	C	T	N		527920	T	C	C		638208	C	G	C
						1078107	A	T	N							1030387	G	T	N		528417	C	T	C		638471	A	C	N
						1078246	A	T	C							1030407	T	A	N		528436	T	C	C		638506	G	C	N
						1078886	C	T	C							1030408	A	G	N		528818	T	A	C		638530	T	C	N
						1079214	A	T	N							1030484	G	A	N		528838	T	C	C		638640	C	A	N
						1079273	T	G	N							1030590	G	T	N		529390	A	G	N		638740	A	T	N
						1079304	G	T	N							1030685	G	A	N		529417	A	G	N		638746	T	C	N
						1079307	T	C	N							1030760	T	C	N		529423	G	C	N		638850	G	A	N
						1079349	G	A	N							1030766	G	A	N		529473	G	C	N		639109	A	G	C
						1079369	A	T	N							1030847	G	T	N		529572	C	T	N		639571	A	G	C
						1079443	G	A	N							1030964	C	T	N		529930	C	T	C		641667	A	G	N
						1079493	T	C	N							1030977	C	T	N		530029	G	A	C		641673	A	T	N
						1079564	A	C	N							1031012	C	G	N		530671	A	T	C		641954	C	T	N
						1079640	T	A	N							1031073	C	T	N		531245	G	A	C		641999	G	C	N
						1079647	T	C	N							1031074	C	T	N		535842	C	G	N		642231	C	G	N
						1079829	G	A	N							1031083	A	G	N		535908	G	A	C		642295	G	A	N
						1079830	C	T	N							1031154	T	C	N		536257	T	C	C		642340	C	T	N
						1079877	T	A	N							1031171	C	T	N		537399	C	T	C		642377	C	T	N
						1079978	T	G	N							1031223	G	A	N		537723	G	A	N		642826	C	T	N
						1079989	T	G	N							1031230	A	G	N		537742	A	T	N		642886	G	A	N
						1079991	G	T	N							1031286	C	T	N		537861	T	G	N		642898	C	A	N
						1080354	A	C	C							1031293	G	A	N		537918	T	A	N		642981	G	A	N
						1080589	C	T	C							1031295	G	T	N		539150	G	A	C		643045	C	T	N
						1080827	C	A	C							1031315	C	T	N		539180	A	G	C		643106	T	A	N
						1082274	C	T	N							1031433	C	T	N		540086	A	G	N		643160	A	C	N
						1082396	A	G	N							1031458	A	C	N		540087	A	G	N		643173	T	C	N
						1084220	C	T	N							1031618	T	G	N		541326	G	A	C		643256	T	C	N
						1084234	T	A	N							1031622	A	G	N		541354	T	C	C		643276	A	T	N
						1084356	G	A	N							1031670	T	G	N		541414	G	T	N		643853	T	A	C
						1084486	T	G	N							1031756	A	G	N		541445	C	A	N		644006	A	T	C
						1084514	A	C	N							1031766	C	T	N		541463	T	C	N		646281	A	G	N
						1084554	A	C	N							1031780	C	G	N		541484	G	A	N		647904	T	A	N
						1084683	T	C	N							1031838	T	A	N		541842	C	A	N		648015	G	A	N
						1085113	C	T	N							1031853	G	A	N		541856	A	G	N		648523	G	A	C
						1085192	A	G	N							1034518	C	G	N		541876	G	T	N		648610	A	G	C
						1085193	C	T	N							1034528	T	C	N		541889	G	A	N		649048	G	A	C
						1085196	G	A	N							1034605	T	C	N		541900	C	T	N		649205	T	C	C
						1085430	T	A	N							1034633	C	T	N		542016	T	C	N		649555	A	T	C
						1085434	T	C	N							1034782	A	T	N		544342	C	T	C		649588	C	G	C
						1085459	T	A	N							1041498	T	C	N		544369	C	T	C		649801	C	G	N
						1085494	A	C	N							1045609	C	T	C		544727	G	T	C		650019	C	A	N
						1085528	G	A	N							1049727	A	G	C		546643	T	A	C		651308	T	C	C
						1085591	G	A	N							1061573	T	C	C		546661	A	T	C		652579	G	T	N
						1085614	A	T	N							1065032	G	A	N		546841	G	C	C		652661	A	G	N
						1085893	A	T	N							1065403	A	C	N		546973	A	G	C		652685	T	A	N
						1085895	C	A	N							1065423	G	A	N		547592	T	G	N		656633	C	T	C
						1085900	A	T	N							1065590	G	A	N		547938	G	A	N		657412	T	C	C
						1085960	T	C	N							1068310	A	C	C		548593	T	A	N		657838	T	C	C
						1086046	A	T	N							1068530	A	G	C		549401	T	C	C		658195	C	T	C
						1086068	C	A	N							1070375	A	G	N		549608	T	C	C		658251	A	C	C
						1086375	A	C	N							1070412	A	G	N		549612	G	C	C		658543	C	T	C
						1086396	G	A	N							1070413	A	G	N		549613	C	A	C		658730	G	A	C
						1086440	A	C	N							1070766	C	A	N		557996	G	A	N		658894	G	C	N
						1086449	A	G	N							1070786	T	C	N		557998	G	A	N		660619	G	A	C
						1086459	G	A	N							1071667	C	T	N		558015	A	T	N		662795	T	C	C
						1086506	T	C	N							1072394	T	C	C		560720	C	G	C		662865	C	T	C
						1086649	C	T	N							1072851	G	A	C		560780	C	A	C		663116	A	G	C
						1086660	A	T	N							1072869	G	A	C		560838	A	G	C		663197	C	A	C
						1087122	G	A	C							1072925	G	T	C		560871	G	A	C		664363	T	C	N
						1087185	C	A	C							1072942	A	C	C		560872	G	A	C		664455	A	T	N
						1087191	G	A	C							1073343	C	G	N		560918	A	G	C		664456	T	A	N
						1087323	T	C	C							1073362	C	T	N		560948	T	C	C		664504	T	A	N
						1087537	A	T	C							1073407	A	G	N		561285	C	G	C		664688	C	T	N
						1087544	A	G	C							1073669	C	T	C		561335	A	G	C		664771	T	C	N
						1088071	C	G	C							1073717	T	C	C		561350	A	T	C		665338	T	A	C
						1088300	A	G	C							1073795	T	C	C		561497	C	A	C		665497	T	C	C
						1088917	A	G	C							1073813	T	C	C		562079	A	T	C		665755	C	T	C
						1088946	C	T	C							1074005	A	T	C		562774	T	A	C		666405	C	A	C
						1088995	C	T	C							1074516	G	C	N		562943	T	C	C		666455	C	T	C
						1089085	C	A	C							1074597	C	T	N		562975	C	T	C		667169	C	A	C
						1089557	C	T	N							1074602	T	C	N		563119	A	G	C		667353	C	G	C
						1089596	C	T	N							1074628	T	C	N		563230	G	A	C		667438	G	T	C
						1089618	C	A	N							1074656	A	G	N		563329	C	T	C		667762	C	T	C
						1089775	A	G	N							1074784	A	G	N		563426	G	C	N		667972	A	G	C
						1089867	T	A	N							1074832	T	C	C		563548	A	G	N		667983	G	A	C
						1089944	T	C	N							1074987	C	T	C		563613	T	C	N		668353	C	T	C
						1090034	T	G	N							1076284	T	G	C		563656	A	G	N		669356	A	G	C
						1090261	G	A	C							1078057	T	A	N		564048	C	T	C		669627	T	G	N
						1090934	T	A	C							1078122	G	A	N		564144	G	A	C		669644	T	A	N
						1091288	G	A	C							1078205	G	A	C		564168	A	G	C		669675	T	C	C
						1091344	T	C	C							1079303	C	T	C		564170	A	G	C		669728	G	T	C
						1091351	G	A	C							1079809	C	A	N		564491	G	A	C		670386	C	T	C
						1091429	T	C	C							1079831	A	T	N		564538	C	A	C		670394	A	G	C
						1091435	C	T	C							1079853	A	G	N		568846	T	A	N		671518	T	C	C
						1091444	C	T	C							1079860	T	C	N		572944	G	A	C		671525	T	C	C
						1091450	C	T	C							1079921	A	G	N		574201	C	T	C		671567	T	C	C
						1092140	A	T	C							1080012	T	C	N		574808	T	C	C		671581	C	T	C
						1092200	A	T	C							1080059	C	G	N		574827	T	G	C		671852	A	T	N
						1092203	T	C	C							1080076	T	C	N		575318	C	T	C		671853	T	G	N
						1095726	C	T	C							1080089	A	G	N		575444	G	A	C		671935	A	T	N
						1095727	T	A	C							1080193	G	A	N		575596	G	A	C		672126	G	A	C
						1096146	T	C	N							1080278	G	T	N		575982	G	A	C		672219	A	G	C
						1096147	C	T	N							1080528	G	A	N		576038	T	C	C		672220	C	A	C
						1097271	A	C	C							1080703	C	T	C		576050	A	T	C		672240	T	C	C
						1100682	T	G	C							1081449	T	A	C		577122	C	G	C		672298	C	T	C
						1100684	T	A	C							1084836	A	G	N		577346	T	C	N		672594	A	G	C
						1100688	G	T	C							1084898	T	C	N		577397	A	G	N		672599	A	T	C
						1100692	C	T	C							1085082	A	G	N		577422	A	G	N		672602	A	T	C
						1101483	A	T	N							1085109	T	C	N		577424	A	C	N		672605	A	T	C
						1101554	C	T	N							1085136	T	A	N		577473	A	G	N		672649	T	A	C
						1101555	A	G	N							1085151	T	A	N		577509	C	T	N		672727	C	T	C
						1101556	A	T	N							1085321	G	C	N		578043	G	C	C		672804	A	G	C
						1101565	G	T	N							1085423	A	C	N		578290	C	T	C		672885	A	G	C
						1101680	G	A	C							1085595	A	G	N		578407	A	G	C		672983	T	A	C
						1102028	T	C	C							1085606	T	C	N		578608	C	A	N		673057	G	A	N
						1102991	C	T	N							1085709	T	C	N		578746	C	T	N		673064	G	A	N
						1104256	G	A	C							1085884	C	T	N		580307	A	C	N		674072	T	C	C
						1104297	C	T	C							1086018	G	T	N		580521	C	T	N		674250	T	C	C
						1104980	C	A	C							1086330	C	T	N		580589	C	A	N		674698	G	A	C
						1105047	A	G	C							1086400	G	A	N		580859	C	T	N		675061	A	T	N
						1105268	C	T	C							1086938	T	A	C		581310	C	T	C		675171	A	T	N
						1106551	A	G	C							1086941	T	C	C		581328	T	C	C		675192	C	A	N
						1106853	A	G	C							1087168	A	G	C		581919	A	G	C		675294	C	A	N
						1106854	A	T	C							1087178	C	T	C		582558	T	C	C		675334	C	T	N
						1106873	C	T	C							1087209	G	A	C		582723	C	T	C		675356	G	C	N
						1106898	C	G	C							1087270	T	C	C		583158	A	G	C		675479	C	G	N
						1108358	T	G	N							1087313	T	A	C		583230	G	A	C		675528	C	A	N
						1108754	A	T	N							1087460	T	C	C		583593	G	A	C		675572	C	G	N
						1108890	G	A	N							1087560	A	G	C		583665	G	A	C		675593	A	G	N
						1113500	T	A	C							1087639	A	G	C		584027	T	G	N		675620	T	C	N
						1114289	T	C	N							1088168	G	A	C		584088	G	A	N		675637	G	C	N
						1114338	G	C	N							1088197	A	C	C		584219	C	T	N		675665	T	C	N
						1114352	A	T	N							1088461	T	C	C		584585	A	G	N		676157	C	T	N
						1114466	C	T	N							1088486	G	A	C		585215	A	G	N		676174	G	A	N
						1114486	G	C	N							1089643	T	C	C		585622	T	G	N		676258	T	A	N
						1114490	C	G	N							1091002	T	C	N		585876	T	C	N		676291	A	T	N
						1114550	A	G	N							1091193	T	C	C		586132	T	C	N		676373	A	G	N
						1114555	A	T	N							1091296	C	T	C		586176	A	G	N		676429	A	C	N
						1114579	G	A	N							1091358	C	A	C		586184	A	G	C		676509	G	T	N
						1114629	T	C	N							1092013	C	T	C		586262	G	A	C		676512	T	C	N
						1114696	C	A	N							1093712	T	C	N		586382	C	A	C		676513	T	C	N
						1114697	C	A	N							1093741	T	C	C		586463	T	C	C		676516	G	A	N
						1114699	T	C	N							1093882	C	T	C		587038	A	T	C		676519	T	C	N
						1114702	C	T	N							1094469	T	A	C		587081	T	C	N		676697	T	G	N
						1114706	C	G	N							1094609	G	A	C		587082	T	A	N		677714	A	T	C
						1114768	A	G	N							1094619	T	A	C		587343	G	A	N		677760	T	G	C
						1114853	T	C	N							1094786	A	G	C		587573	G	A	N		677761	G	A	C
						1114865	T	C	N							1094802	T	C	C		588037	T	A	N		679018	A	G	C
						1114870	G	C	N							1094848	A	G	C		588515	C	T	C		679190	C	T	C
						1115011	G	A	N							1095097	T	C	C		589169	T	C	C		679334	G	A	C
						1115013	T	A	N							1095170	T	C	C		589755	A	T	N		680144	T	C	N
						1115024	T	G	N							1095546	A	T	C		589801	A	G	C		681449	G	A	N
						1115606	A	G	N							1095894	G	A	C		589849	A	G	C		681620	A	T	N
						1115805	A	T	N							1097366	A	T	N		589852	A	G	C		681669	T	C	N
						1115857	G	T	N							1097368	G	A	N		593063	T	A	C		681732	T	C	N
						1115903	A	G	N							1097527	A	C	N		593069	G	A	C		681756	T	C	N
						1115963	T	C	N							1097591	G	A	N		593094	A	G	C		684161	G	A	N
						1116340	C	T	C							1097605	G	C	N		594553	T	C	C		684294	T	C	N
						1116678	T	A	N							1097621	T	A	N		594964	G	A	C		684297	T	C	N
						1116760	T	C	N							1097631	T	A	N		595186	G	A	C		684378	C	T	N
						1116881	T	C	N							1097786	C	T	N		595267	C	T	C		684518	T	G	N
						1116961	T	A	N							1097795	A	T	N		595282	C	T	C		684664	G	A	N
						1116998	T	C	N							1097874	G	A	C		595444	G	A	C		684757	G	A	N
						1117207	A	G	N							1099124	A	G	N		595492	G	T	C		684798	T	G	N
						1117331	A	T	N							1099177	G	C	N		595842	T	C	C		684804	A	G	N
						1117340	G	A	N							1099334	G	C	N		596215	A	T	N		685385	C	A	C
						1117462	G	A	N							1099359	T	C	N		596650	C	G	N		685719	A	T	C
						1117472	T	G	N							1099419	A	G	N		596748	C	T	N		685753	G	A	C
						1117473	C	G	N							1099798	C	T	N		597142	T	C	C		685754	G	C	C
						1117887	A	G	N							1099860	C	T	N		597145	A	T	C		685969	T	G	N
						1117920	G	A	N							1100391	C	T	N		597381	A	T	C		685992	C	T	N
						1118012	G	A	N							1100439	T	C	N		597413	T	C	C		686017	C	T	N
						1118156	G	C	N							1100509	C	A	N		597427	G	A	C		686019	A	G	N
						1118253	T	G	N							1100778	G	A	N		597620	G	A	C		686111	C	T	N
						1120968	T	C	C							1101868	G	A	C		597629	T	C	C		686138	T	C	N
						1121233	C	A	C							1102177	G	A	C		597671	T	G	C		686187	A	G	N
						1121301	C	T	C							1102507	T	C	C		597990	G	T	C		686188	G	C	N
						1131231	G	A	N							1103909	C	T	C		598133	G	A	C		686191	C	T	N
						1131379	A	C	N							1105424	C	T	C		598204	T	G	C		686520	C	G	C
						1131820	T	C	C							1105538	C	T	C		598246	A	G	C		686535	G	C	C
						1131827	A	T	C							1105593	T	C	C		598334	A	G	C		686840	T	C	C
						1137238	T	A	C							1105595	T	C	C		598336	G	A	C		686841	A	C	C
						1138001	A	G	C							1105794	T	G	C		598473	G	A	C		686842	A	C	C
						1138662	A	T	N							1107689	C	T	C		598480	T	C	C		686861	T	C	C
						1138713	T	G	N							1107801	A	G	C		598588	T	A	C		686863	A	C	C
						1139790	G	C	N							1108316	A	T	N		598645	C	A	C		687800	T	G	N
						1139832	A	G	N							1109827	A	G	C		598861	C	A	C		687805	G	C	N
						1141236	T	C	C							1109962	C	T	C		598954	T	C	C		687807	G	A	N
						1148188	T	G	C							1110361	G	A	C		599008	C	T	N		700120	T	C	C
						1148658	G	C	N							1111408	A	G	C		599088	A	T	N		700135	C	T	C
						1156435	G	A	C							1111618	T	C	C		599397	G	A	N		700728	T	C	C
						1156575	C	T	C							1112923	T	C	C		599561	T	C	C		701361	G	A	C
						1157912	G	A	C							1113001	G	A	C		599779	C	T	N		701792	C	T	N
						1164605	G	A	C							1113740	T	C	N		599816	T	C	N		701796	A	G	N
						1165719	C	T	C							1115458	T	C	C		599957	A	T	C		701929	A	G	N
						1167892	A	G	C							1115942	A	G	N		600285	C	T	C		701974	A	G	N
						1171802	A	G	C							1116074	C	T	N		600868	A	T	C		702163	T	G	C
						1172249	A	G	C							1116155	C	T	N		601409	C	T	C		702283	A	G	C
						1172579	G	A	C							1116186	G	A	N		601923	C	T	C		702325	T	G	C
						1172681	T	C	C							1116235	A	G	N		602481	A	C	C		702436	T	C	C
						1173321	C	T	N							1116236	A	G	N		602495	A	G	C		702439	A	T	C
						1175123	C	T	C							1116969	T	A	N		602651	A	C	N		702562	A	G	C
						1192658	T	C	C							1117159	A	G	C		602660	C	T	N		702637	T	C	C
						1192668	T	C	C							1117529	C	T	C		602675	G	A	N		703025	C	T	N
						1193027	C	T	C							1117537	C	T	C		602774	T	G	N		703176	G	C	N
						1193181	G	A	C							1117538	C	T	C		602993	A	C	N		710130	C	T	N
						1196762	A	G	C							1117877	G	A	C		603100	A	C	N		713005	G	A	N
						1196779	T	G	C							1118842	G	A	C		603112	A	G	N		731845	G	C	N
						1197229	T	A	C							1118953	C	G	C		603720	A	G	N		738567	C	T	C
						1197577	G	C	N							1119088	G	A	C		603778	T	C	N		738842	G	A	C
						1197664	T	C	N							1119306	C	T	C		603826	C	A	N		738922	C	T	C
						1198630	G	A	C							1119598	C	T	C		603952	G	A	C		739313	A	G	C
						1198723	T	C	C							1122059	C	A	C		604137	T	G	C		739318	G	A	C
						1198993	A	T	C							1122138	T	C	C		604152	A	G	C		739506	T	A	N
						1199122	A	G	C							1123178	A	T	N		605604	T	C	C		740071	T	G	N
						1199222	A	T	C							1123324	G	A	N		605650	G	C	C		740163	T	C	N
						1199387	T	C	C							1124460	A	T	C		605739	T	C	C		740208	A	G	N
						1199666	A	G	C							1124463	A	T	C		606254	T	G	C		740216	A	G	N
						1203524	G	A	C							1125121	C	A	C		606395	C	T	C		740242	C	A	N
						1205257	A	G	N							1125201	A	T	C		606404	T	C	C		740357	T	A	N
						1206616	T	C	C							1126770	A	G	C		606644	T	G	C		740385	T	A	N
						1206797	C	T	C							1126908	A	G	C		608052	A	T	C		740386	A	T	N
						1207018	C	T	C							1127029	T	A	C		608115	T	C	C		740503	G	T	N
						1207325	A	C	N							1127053	C	T	C		611621	T	C	N		740523	C	T	N
						1207618	A	T	N							1127565	A	G	C		611634	A	C	N		740568	T	A	N
						1207728	A	G	N							1127583	C	T	C		611644	T	C	N		740622	C	T	N
						1207919	T	C	N							1127586	T	C	C		611736	T	C	N		740627	C	A	N
						1207971	A	T	N							1127658	T	C	C		612087	G	A	C		740749	A	G	N
						1208228	A	G	N							1128072	C	T	C		612144	C	A	C		740788	A	T	N
						1208321	C	T	N							1128225	A	G	C		613038	A	G	C		740796	A	T	N
						1208341	G	T	N							1128535	T	G	C		613287	A	G	C		740797	A	C	N
						1210273	T	A	N							1128558	T	C	C		614418	A	T	N		740801	C	T	N
						1216280	G	A	C							1128828	T	A	N		614466	T	C	N		740810	T	C	N
						1216446	T	G	C							1128829	T	C	N		614543	T	G	N		740812	T	C	N
						1216500	A	T	C							1128843	C	G	N		614544	A	C	N		740928	G	A	N
						1216660	A	T	C							1128868	T	C	N		614545	C	T	N		740963	G	C	N
						1216795	A	C	C							1128945	A	C	N		614602	G	A	N		741021	A	T	N
						1216816	G	A	C							1129149	A	G	N		614695	T	G	N		741030	G	A	N
						1216916	A	C	C							1129204	T	A	N		615124	C	T	N		741103	T	G	N
						1217235	T	C	C							1129206	T	C	N		615181	C	T	N		741117	G	T	N
						1217416	G	T	N							1129252	C	T	N		615329	A	G	N		741138	T	G	N
						1217457	C	A	N							1129322	C	T	C		615495	C	T	N		741141	A	T	N
						1217556	T	C	N							1129519	G	C	C		615612	G	A	N		741345	C	A	N
						1217585	A	G	N							1129522	C	A	C		615772	C	T	N		741643	T	G	N
						1220625	A	G	C							1129952	A	G	C		616081	G	C	N		741693	A	C	C
						1221055	C	T	C							1130003	G	A	C		616631	A	T	N		741773	T	C	C
						1222054	G	A	C							1130028	A	G	C		616669	C	G	N		742145	A	T	C
						1222168	T	A	N							1130057	C	T	C		616713	G	T	N		742146	A	G	C
						1222234	G	C	N							1130134	C	T	C		618375	G	A	C		742172	C	G	C
						1222285	C	T	N							1130144	A	T	C		618596	C	T	C		742180	T	A	C
						1222302	C	G	N							1130150	C	T	C		618837	T	A	C		742487	G	A	C
						1222384	A	T	N							1130216	A	G	C		618843	A	G	C		742684	A	T	C
						1222412	A	G	N							1130834	T	C	C		618845	A	T	C		742885	G	A	C
						1222413	T	A	N							1131296	G	A	C		618999	G	A	C		743169	T	C	C
						1222414	T	A	N							1131446	T	C	C		619071	T	C	C		743295	C	T	C
						1223155	A	T	C							1131818	C	A	C		619705	C	T	C		743310	C	T	C
						1223394	C	G	N							1134336	A	C	N		619888	A	T	C		743589	C	T	C
						1223395	A	G	N							1134408	T	G	N		620232	A	T	C		743595	C	T	C
						1223707	T	C	N							1134453	T	A	N		621172	C	G	N		743609	A	G	C
						1224461	A	G	C							1134454	T	A	N		621208	T	A	N		743859	G	T	C
						1224659	T	G	C							1134487	A	G	N		622100	G	A	N		743915	A	T	C
						1224776	G	A	C							1134494	T	A	N		623009	T	C	C		743916	T	G	C
						1225023	G	T	N							1134575	T	A	C		627243	C	A	C		743951	A	G	C
						1225026	T	G	N							1134659	T	A	C		630189	A	C	C		743976	A	G	C
						1225054	A	G	N							1134801	T	C	C		630297	C	T	C		743995	A	G	C
						1225154	C	T	N							1134987	T	G	C		630383	A	C	C		744031	G	T	N
						1225954	C	T	C							1135111	C	T	C		630676	T	C	C		744042	T	A	N
						1226427	C	T	C							1135124	A	G	C		630726	C	T	C		744179	T	A	N
						1226430	C	T	C							1135130	A	G	C		631077	T	C	C		744183	C	A	N
						1226433	C	T	C							1135134	T	C	C		631563	A	G	C		744267	C	T	N
						1227621	G	A	N							1135156	T	A	C		631572	C	T	C		744388	T	A	N
						1232343	G	A	C							1135204	T	G	C		632238	C	T	C		744395	A	C	N
						1232944	T	C	C							1135273	G	T	C		632256	T	A	C		744483	A	G	N
						1233018	C	G	C							1135274	T	A	C		632518	G	C	N		744500	T	A	N
						1233591	C	T	C							1135276	G	T	C		632682	T	C	N		744506	T	A	N
						1233672	T	C	C							1135623	A	G	C		632724	T	C	N		744518	A	T	N
						1233690	A	G	C							1135753	G	T	C		632765	C	T	N		744554	C	A	N
						1233791	C	T	C							1135756	A	C	C		632818	A	G	N		744572	G	A	N
						1233880	A	G	C							1135776	A	G	C		632881	T	C	N		744639	T	A	N
						1235767	A	G	C							1136036	A	G	N		635306	G	A	C		744732	G	A	N
						1236010	C	G	C							1136048	A	G	N		635333	A	G	C		744789	G	T	N
						1236105	A	G	C							1136070	T	C	N		635391	T	G	C		744973	G	T	N
						1237325	A	G	N							1136074	G	A	N		635697	T	G	C		745023	A	G	N
						1237510	T	A	N							1136112	T	G	N		635710	A	T	C		745062	C	T	N
						1237935	G	A	N							1136127	G	T	N		635935	G	A	C		745064	G	A	N
						1237962	C	T	N							1136132	C	G	N		636536	T	C	C		745070	G	T	N
						1238011	A	G	N							1136282	A	G	N		637430	T	C	C		745071	G	T	N
						1238112	G	T	N							1136482	A	G	N		637931	A	T	C		745095	A	C	N
						1238113	A	T	N							1136507	A	G	N		638213	A	C	C		745097	A	T	N
						1238114	A	G	N							1136683	G	C	N		638291	A	T	C		745100	T	A	N
						1238115	G	A	N							1136686	C	G	N		638540	A	G	N		745106	A	C	N
						1238118	G	A	N							1136701	C	G	N		638571	A	G	C		745109	A	T	N
						1238130	T	A	N							1136704	G	C	N		638573	C	T	C		745508	C	T	C
						1238504	T	A	N							1136717	G	A	N		638748	T	C	C		745576	G	A	C
						1238526	A	T	N							1136781	T	C	N		638996	G	A	C		745735	T	A	C
						1238716	G	A	N							1136856	C	T	N		639573	A	G	C		745898	A	C	C
						1238983	T	C	C							1136859	A	G	N		639615	G	A	C		745901	A	G	C
						1239830	A	G	C							1139764	C	T	N		639751	A	G	C		745905	T	C	C
						1247427	T	G	N							1140521	G	A	N		640098	C	T	C		745919	A	G	C
						1249281	C	T	C							1149264	C	T	C		640264	A	G	C		746158	G	T	C
						1253189	T	A	C							1149588	A	T	C		640416	T	A	C		746246	G	A	N
						1253462	T	C	C							1149726	C	T	C		640758	C	T	C		746284	T	G	N
						1253522	G	A	C							1149786	G	A	C		640794	A	G	C		746562	T	A	N
						1253666	C	T	C							1150044	T	C	C		641133	A	G	C		746623	A	T	N
						1253687	T	C	C							1150092	C	A	C		641310	C	T	C		746636	T	A	N
						1253826	T	C	C							1151002	G	T	C		641358	T	C	C		746647	G	A	N
						1254529	G	A	N							1151091	T	A	C		641443	A	G	C		746656	A	G	N
						1254531	T	A	N							1151124	A	G	C		641914	A	G	N		746802	C	T	N
						1254534	T	A	N							1151427	A	G	C		642386	G	A	C		746808	C	A	N
						1254536	T	A	N							1151567	C	T	C		642470	G	C	C		746920	T	C	N
						1254537	T	A	N							1151958	G	A	C		642981	A	T	N		747000	A	T	N
						1254542	T	A	N							1152120	A	G	C		642985	G	C	N		747001	A	T	N
						1254544	T	C	N							1152333	G	A	C		645953	C	G	C		747031	T	A	N
						1254586	T	C	N							1152816	C	G	N		646001	A	G	C		747075	T	C	N
						1255075	G	A	C							1153153	G	A	N		646053	G	A	C		747076	G	A	N
						1255102	T	C	C							1153185	C	T	N		646421	C	T	C		747077	G	A	N
						1255888	G	A	C							1153385	A	G	N		646475	T	C	C		747078	T	C	N
						1256652	A	G	C							1153816	A	G	N		646662	G	A	C		747079	T	C	N
						1256697	A	T	C							1153881	G	T	N		648733	T	A	C		747080	G	A	N
						1256859	T	A	C							1153968	C	T	N		648802	A	T	C		747112	T	C	N
						1256898	T	A	C							1159940	A	G	N		650794	G	A	C		747121	G	A	N
						1257394	T	C	C							1160268	C	G	C		650992	A	C	N		747122	C	A	N
						1257530	A	G	C							1160413	A	G	C		651003	C	T	N		747132	T	A	N
						1258059	T	C	C							1160462	T	C	C		651164	G	A	C		747220	C	T	N
						1261274	C	T	N							1160584	G	C	C		651288	A	C	C		747226	G	A	N
						1261714	C	G	C							1160896	G	T	C		651806	C	T	C		747241	T	C	N
						1261796	G	T	C							1161109	T	G	C		652139	T	A	C		747243	G	C	N
						1261895	A	G	C							1161166	C	T	C		652280	G	A	C		747247	T	C	N
						1261985	G	A	C							1161409	G	A	C		652467	A	T	N		747252	G	C	N
						1262420	A	G	C							1168736	A	C	C		653113	G	C	N		747393	A	T	N
						1262570	T	C	C							1169262	C	T	C		653227	T	C	C		747399	C	T	C
						1264744	G	A	C							1169361	G	A	C		655466	T	C	C		747469	A	G	C
						1264793	G	A	C							1169668	T	G	C		655706	T	A	C		747470	T	G	C
						1264835	G	T	C							1170288	A	G	C		655775	T	C	C		747494	A	T	C
						1264923	G	A	C							1170480	A	G	C		655798	C	T	C		747543	T	C	C
						1264931	G	T	C							1170648	A	G	C		655858	T	C	C		747550	T	A	C
						1265000	C	T	C							1170889	G	A	N		659087	G	C	N		747558	T	C	C
						1266033	T	G	N							1171135	C	G	C		659679	T	C	N		749666	A	G	N
						1266084	A	T	N							1171778	C	A	C		659737	A	T	N		749673	T	G	N
						1266085	A	T	N							1174685	G	A	C		659738	G	C	N		749677	A	G	N
						1266293	A	C	N							1174940	C	T	C		659739	A	T	N		749685	G	A	N
						1266323	G	A	N							1175063	C	A	C		659849	T	C	N		749835	A	T	N
						1266526	A	T	N							1175090	T	A	C		659910	A	G	N		749941	T	G	N
						1266634	G	C	C							1175152	T	C	C		659918	T	C	N		750025	C	T	N
						1266649	A	G	C							1175309	G	A	C		659921	A	G	N		750077	A	T	N
						1270425	T	C	C							1180467	A	G	C		660352	A	T	N		750078	A	T	N
						1271260	A	G	C							1180732	C	A	C		660629	T	C	N		750079	A	T	N
						1271377	C	T	C							1180796	T	G	C		660695	T	C	N		750082	G	T	N
						1271584	T	G	C							1180865	C	A	C		660733	G	A	N		750133	C	A	N
						1271671	G	A	C							1180943	A	C	C		660758	C	G	N		750240	G	A	N
						1271995	C	T	C							1181981	T	A	C		660820	C	T	N		750264	A	T	N
						1273427	T	C	C							1184606	T	C	C		660884	A	G	N		750404	G	A	N
						1273507	C	T	C							1184873	T	C	C		660893	T	C	N		750664	G	A	N
						1273855	C	T	C							1185702	A	G	C		662268	A	T	C		750775	C	T	N
						1273984	G	T	N							1185802	C	T	C		662283	G	A	C		750778	T	C	N
						1274019	G	A	N							1185970	T	C	C		662312	A	T	N		750779	T	C	N
						1274110	A	G	N							1186186	A	C	C		662669	A	G	N		750801	G	T	N
						1276186	G	A	C							1186798	A	G	C		662710	A	C	N		751465	T	A	N
						1276927	G	A	C							1186843	C	T	C		662807	A	T	N		751467	T	A	N
						1276948	T	C	C							1186985	A	G	C		662863	T	A	N		751469	T	A	N
						1277017	G	A	C							1187030	A	G	C		662869	C	G	N		751470	T	C	N
						1277041	T	C	C							1187100	A	G	C		662982	C	T	N		751511	T	C	N
						1277934	C	T	N							1187108	T	C	C		663023	G	T	N		751513	T	C	N
						1278108	T	C	N							1187589	A	G	C		663025	T	A	N		751552	T	A	N
						1278352	C	A	C							1187816	A	G	C		663026	C	A	N		751618	T	A	N
						1278679	T	A	C							1187954	C	A	C		663106	T	A	N		751658	G	C	N
						1279487	G	A	C							1188006	G	A	C		663174	C	A	N		751720	T	C	N
						1280741	A	T	N							1188220	G	A	C		663180	G	A	N		752808	T	C	C
						1281509	A	C	C							1188224	A	G	C		663182	C	T	N		752834	T	A	C
						1281782	A	G	N							1188327	G	A	C		663472	A	C	N		752844	A	G	C
						1281913	C	T	C							1188470	G	C	C		663537	T	A	N		752877	C	G	C
						1281936	G	T	C							1188492	G	A	C		663545	C	T	N		762255	G	C	C
						1282184	T	C	C							1188789	T	C	C		663708	T	C	N		762500	T	C	C
						1282447	C	T	C							1189023	A	C	C		663729	T	C	N		763066	G	A	C
						1282716	C	T	C							1189097	T	A	C		663787	A	C	N		763551	C	T	N
						1283633	T	C	C							1189226	C	T	C		663788	T	G	N		763634	T	C	C
						1286829	C	T	C							1189343	T	A	C		663789	T	A	N		763825	G	A	C
						1287255	T	C	N							1189768	A	T	N		663790	T	A	N		763987	C	T	C
						1287490	T	C	N							1189769	C	T	N		663791	T	A	N		764392	G	A	C
						1287681	A	C	N							1189851	A	C	N		663792	T	A	N		764893	A	G	C
						1287959	G	A	N							1189932	C	T	N		663793	T	A	N		765135	C	T	N
						1288535	G	A	N							1189960	C	A	N		663794	T	A	N		765854	A	G	C
						1288550	G	A	N							1189974	A	T	N		663806	T	C	N		765966	C	G	C
						1288637	T	C	N							1190018	A	G	N		663846	T	A	N		765975	C	G	C
						1288779	T	A	N							1190020	G	A	N		663848	T	A	N		765978	C	G	C
						1291312	C	T	C							1190267	T	C	C		663849	C	A	N		765981	G	C	C
						1291445	A	C	C							1190575	G	A	C		663850	G	A	N		765982	T	G	C
						1291458	T	C	C							1190895	C	T	C		665172	G	A	C		766017	A	C	C
						1292091	A	C	C							1191767	C	T	C		665180	G	A	C		766042	C	T	C
						1297196	T	C	N							1191803	C	T	C		665187	A	G	C		766045	T	C	C
						1297310	A	T	N							1191905	A	T	C		665192	A	G	C		766048	T	C	C
						1297887	T	C	N							1192194	G	T	C		665512	C	A	C		766347	A	C	C
						1298584	A	C	N							1192909	C	T	C		665565	A	G	C		766360	C	T	C
						1298886	T	C	N							1193058	C	T	C		665628	G	C	C		766398	C	T	C
						1299574	A	G	N							1207061	T	A	C		665636	A	G	C		766414	T	C	C
						1299735	C	T	N							1207154	T	C	C		666468	G	A	C		766454	C	G	C
						1299750	T	C	N							1207157	T	C	C		667279	A	G	N		766719	C	A	C
						1299789	C	G	N							1207167	A	C	C		667441	A	T	N		766747	A	G	C
						1299844	C	T	N							1207173	A	C	C		667458	A	G	N		766890	G	A	N
						1299875	T	C	N							1207320	A	G	C		667755	A	G	C		766989	T	A	N
						1299890	G	T	N							1207455	T	A	C		667861	T	A	C		767068	G	T	N
						1299973	A	T	N							1208390	G	A	N		668141	G	C	C		767074	T	A	N
						1302071	G	A	C							1208469	T	C	N		668199	T	A	C		767089	T	A	N
						1302074	A	G	C							1210604	A	C	C		668454	A	T	C		767194	T	A	N
						1302077	A	G	C							1212863	A	G	C		668496	A	G	C		767316	G	C	N
						1302080	A	G	C							1212933	A	G	C		668594	C	A	C		767327	T	A	N
						1303089	C	T	C							1213337	A	G	C		669431	T	G	C		767483	A	T	N
						1307072	A	C	N							1213639	C	T	N		669432	G	T	C		767487	A	T	N
						1307134	T	A	N							1213658	T	C	N		669433	A	G	C		767490	A	G	N
						1307503	G	A	C							1213731	T	A	N		669443	C	G	C		767528	T	C	N
						1307523	C	T	C							1213788	A	G	N		670765	G	A	N		767688	A	G	N
						1307799	A	G	N							1225083	A	T	N		670766	T	C	N		773786	A	G	C
						1307875	A	G	N							1225089	G	A	N		670802	G	T	N		773981	A	G	C
						1308071	G	A	C							1225127	C	T	N		670803	G	A	N		774219	T	C	C
						1308200	T	A	C							1225193	A	G	N		671154	C	A	C		774225	T	C	C
						1308518	G	A	C							1225250	T	G	N		671160	A	T	C		774385	C	T	N
						1308896	A	T	C							1225882	G	A	N		671181	G	A	C		774391	A	T	N
						1309892	A	T	N							1229363	C	T	N		671674	G	A	C		774992	T	A	C
						1309950	G	A	N							1229725	A	G	N		672100	C	A	C		775004	T	A	C
						1310012	C	T	N							1230273	T	C	N		672151	T	C	N		775044	C	G	C
						1310130	T	A	N							1245859	C	G	N		681512	T	C	C		775208	G	A	C
						1310313	C	T	N							1249921	G	A	C		684588	C	T	N		777118	T	C	N
						1310446	A	G	N							1249986	A	G	C		685231	C	T	N		777121	G	A	N
						1310523	C	T	N							1250224	A	G	C		685753	T	C	N		777774	T	G	N
						1310768	T	A	N							1250642	T	C	C		685755	C	G	N		777813	C	T	N
						1310811	C	T	N							1251323	T	C	N		685757	C	T	N		777822	C	T	N
						1310830	A	G	N							1251534	G	A	C		685795	A	G	N		777979	G	A	N
						1310853	T	C	N							1252092	C	T	C		685808	C	G	N		778004	A	G	N
						1310956	C	T	N							1252353	A	G	C		685816	C	G	N		778288	A	C	N
						1310990	C	G	N							1253209	C	T	N		685884	C	A	N		778406	A	G	N
						1311251	T	A	N							1253229	A	G	N		685964	C	G	N		779844	C	T	C
						1311253	A	G	N							1253240	C	A	N		686191	C	T	C		779898	C	A	C
						1311934	C	T	C							1253653	A	G	N		686207	G	A	C		780188	G	T	C
						1311988	A	G	C							1253971	T	G	N		686302	G	A	C		780598	G	A	C
						1312273	A	G	C							1253994	G	A	N		686533	T	A	C		780678	A	G	C
						1313323	T	C	C							1255544	T	C	N		686672	G	A	C		780897	G	A	C
						1313533	A	G	C							1255815	G	C	N		686866	C	T	C		780974	T	C	C
						1313985	G	A	N							1255930	T	C	N		686890	T	C	C		781274	G	A	C
						1314112	A	T	N							1257529	A	G	C		687011	T	C	C		782981	C	T	N
						1314519	A	G	N							1257705	C	A	C		687084	C	G	C		783187	G	T	N
						1314572	T	A	N							1269669	C	T	N		687118	C	T	C		784050	T	A	N
						1314813	A	G	N							1270698	G	A	C		687397	T	C	C		784106	C	T	N
						1314978	C	T	N							1273955	C	A	C		687706	A	G	C		785000	G	T	N
						1315298	T	C	N							1275168	A	G	C		687952	A	G	C		785259	C	T	N
						1315568	C	G	C							1279579	T	A	N		688508	T	G	N		785430	T	C	N
						1315647	A	C	C							1280066	C	A	N		688509	T	G	N		785545	T	C	N
						1316230	T	A	N							1280132	A	C	N		688510	T	G	N		785650	C	T	C
						1316237	A	G	N							1281505	A	T	N		688511	T	G	N		789170	T	C	C
						1316391	T	C	C							1283467	G	A	C		688512	T	G	N		789713	A	G	N
						1317098	T	C	N							1283928	G	C	N		688585	G	T	N		789724	C	T	N
						1317144	C	A	N							1284047	G	A	N		688586	T	A	N		789726	T	G	N
						1317725	T	C	N							1284165	T	G	N		688592	A	G	N		789774	G	T	N
						1317736	T	C	N							1284718	G	T	N		688866	G	A	C		789778	A	G	N
						1317825	C	A	N							1299561	G	A	C		689133	A	G	C		789868	A	G	N
						1317961	G	C	N							1303586	C	T	C		689173	T	C	N		790275	C	T	N
						1318470	G	A	N							1303890	A	T	C		689280	C	T	N		790364	C	A	N
						1318503	T	C	N							1304116	T	C	C		689308	G	C	N		791208	G	C	N
						1318536	A	G	N							1304840	G	C	N		690045	T	A	N		791217	G	A	N
						1320755	G	A	C							1305174	C	T	N		690120	A	T	C		791416	T	A	N
						1320910	C	T	C							1305599	C	T	N		690126	A	T	C		791424	C	A	N
						1320921	A	T	C							1305600	C	T	N		690129	T	A	C		792929	T	C	N
						1320954	A	C	C							1305632	A	G	N		690511	T	G	C		793022	C	G	N
						1321517	T	G	N							1305742	G	A	N		690520	T	G	C		793130	T	C	C
						1321530	C	T	N							1305782	A	T	N		690609	G	A	C		793250	A	T	C
						1322330	T	C	N							1307031	A	G	C		690753	A	G	C		793262	A	T	C
						1325807	G	A	C							1307554	A	C	C		690758	G	T	C		793283	C	T	C
						1325934	T	C	C							1308019	C	T	C		690820	C	T	C		793523	C	A	C
						1326063	T	C	C							1308475	T	C	C		691190	G	A	C		797393	G	A	N
						1326322	G	A	C							1309085	G	A	C		691575	C	T	C		797664	C	T	N
						1326386	C	G	C							1309157	T	C	C		691607	T	C	C		797683	T	C	N
						1326506	T	G	N							1309358	C	T	C		691623	A	G	C		797867	C	A	N
						1326635	C	T	N							1309397	G	A	C		691842	G	A	C		797945	C	T	N
						1326712	G	A	N							1309647	G	A	C		692028	T	C	C		799854	C	A	C
						1326717	G	T	N							1309760	T	C	C		692154	A	G	C		800190	T	C	C
						1326726	C	T	N							1309766	C	T	C		692675	G	T	C		803319	C	T	C
						1326727	C	T	N							1309877	T	C	N		692682	T	G	C		803508	G	T	C
						1326786	T	A	N							1309965	G	A	N		692763	G	A	C		803637	A	G	C
						1326857	A	T	N							1310159	G	A	N		696078	A	T	C		803956	T	G	C
						1326864	G	A	N							1310223	T	G	N		696133	T	A	N		803997	A	C	C
						1326929	A	G	N							1310735	A	G	N		696134	G	A	N		804803	T	C	C
						1326943	G	C	N							1311260	T	A	N		696282	T	G	N		804827	C	T	C
						1326954	C	T	N							1311945	T	A	N		696375	C	T	N		804848	A	G	C
						1327110	G	A	N							1312318	C	T	N		696401	C	T	N		804984	T	C	C
						1327543	C	T	C							1312718	T	C	N		696419	G	T	N		805022	T	C	C
						1329148	T	C	C							1312725	G	A	N		696423	A	T	N		805116	C	T	C
						1329182	T	A	C							1312865	T	A	N		696509	T	A	N		805930	T	C	N
						1329297	G	A	C							1313007	C	T	C		696588	C	T	N		806801	T	C	C
						1332915	G	A	C							1313257	G	A	C		696679	C	T	N		807216	T	A	C
						1333002	A	G	C							1313301	C	T	C		696681	G	T	N		807971	C	T	C
						1333263	G	A	C							1313578	C	T	C		696704	A	C	N		808783	T	G	C
						1333461	T	C	C							1313758	G	A	C		696742	T	A	N		813014	C	A	C
						1335022	G	A	N							1313781	T	C	C		696904	A	T	N		814228	C	T	N
						1335525	T	A	N							1313841	T	G	C		696955	A	T	N		814233	T	C	N
						1335705	T	G	N							1313859	T	C	C		696993	C	T	N		814264	A	T	N
						1335823	C	T	N							1314321	T	C	C		697149	T	C	N		814301	A	G	N
						1335854	A	T	N							1314328	A	G	C		697208	T	A	N		814354	A	G	N
						1335884	T	C	N							1314615	T	C	C		697218	C	T	N		814612	G	A	N
						1335894	C	G	N							1315048	T	C	C		697223	A	C	N		814861	T	C	N
						1335954	G	T	N							1315396	T	A	N		697316	A	T	N		817484	T	C	C
						1335959	G	A	N							1315501	T	G	N		697317	A	T	N		817578	A	T	C
						1336076	A	T	N							1315523	T	C	N		697318	C	T	N		817943	T	C	C
						1336252	G	A	N							1316084	C	G	N		697319	A	T	N		818499	T	C	C
						1336330	G	C	N							1316093	A	C	N		697493	A	T	N		818785	C	T	N
						1336468	T	C	C							1316276	T	C	N		697550	T	C	C		818793	A	T	N
						1336488	T	G	C							1316738	T	C	N		697551	T	C	C		819757	T	A	C
						1336606	G	A	C							1316791	A	G	N		697595	A	G	C		819778	T	C	C
						1336693	C	G	C							1316971	C	T	N		697915	A	C	C		820585	A	G	C
						1336838	G	A	C							1317110	C	T	N		698044	T	C	C		827930	C	A	N
						1337201	A	T	N							1317653	C	T	C		698316	A	G	C		827972	T	C	N
						1337256	A	G	N							1318389	G	A	C		698321	G	T	C		828003	G	A	N
						1337333	C	T	N							1318772	T	C	C		698375	T	C	C		828096	A	G	N
						1337382	T	G	N							1318886	A	G	C		699047	C	T	C		828103	C	G	N
						1337477	A	T	N							1319345	A	C	C		699441	G	A	C		828199	C	T	N
						1337567	A	C	N							1326516	A	G	C		701590	A	G	N		828303	C	T	N
						1337580	C	T	N							1326579	G	A	C		702021	T	A	N		828319	G	T	N
						1337593	T	C	N							1326591	C	T	C		702031	C	T	N		828343	G	A	N
						1337746	G	A	N							1326810	G	A	C		702211	T	C	C		828354	T	C	N
						1338013	G	T	C							1326908	C	T	C		702624	G	A	C		828468	T	C	N
						1338446	G	C	C							1326912	T	C	C		704761	G	A	C		828603	A	T	N
						1338679	A	G	C							1327024	C	T	C		704786	A	T	C		828708	G	C	N
						1338984	C	T	C							1327977	T	C	C		704814	G	A	C		828749	A	C	N
						1339012	A	C	C							1328207	C	A	C		706680	T	C	N		828756	T	C	N
						1339114	T	A	C							1328219	T	C	C		708106	G	C	N		828796	C	T	N
						1340046	G	T	N							1330020	G	C	N		710773	C	T	C		829166	A	G	N
						1340062	T	C	N							1330070	T	C	N		710823	C	T	C		829324	A	T	N
						1340152	A	T	N							1330077	T	C	N		710836	A	G	C		829374	A	G	N
						1340167	A	C	N							1330987	A	C	N		711333	C	T	N		829399	A	G	N
						1340321	A	T	N							1331048	A	C	N		711358	C	G	N		829556	A	G	C
						1340534	A	G	N							1331742	A	G	N		711423	A	C	N		829679	A	G	C
						1340560	C	T	N							1331744	A	G	N		711427	A	G	N		829769	G	A	C
						1340617	G	A	N							1331814	T	C	N		711446	C	T	N		829845	A	G	C
						1349321	G	A	N							1331825	C	T	N		711475	C	T	N		829892	C	A	C
						1349517	T	C	N							1331836	T	C	N		711539	T	C	N		829903	C	T	C
						1352100	A	C	N							1331986	A	T	N		711572	T	C	N		829987	G	A	C
						1352101	A	T	N							1331993	G	A	N		711625	C	A	N		830897	T	G	N
						1352135	A	T	N							1332175	C	G	N		711661	T	C	N		831076	C	T	C
						1352232	A	G	N							1332228	G	A	N		711769	A	G	C		832067	G	A	N
						1352256	T	C	N							1335143	G	T	N		711819	T	C	C		832101	C	T	N
						1352894	G	A	N							1335291	T	C	N		711949	A	G	C		832167	T	C	N
						1353953	A	C	N							1335516	C	A	N		712057	G	C	C		832168	G	A	N
						1353991	T	C	N							1335565	C	T	N		712357	G	A	C		832221	A	G	N
						1354068	A	T	N							1335853	A	C	C		712525	G	A	C		832382	G	A	N
						1354442	C	A	C							1335858	T	A	C		712621	A	G	C		832634	T	G	N
						1354473	C	A	C							1335975	G	A	C		713710	A	G	N		833220	G	A	C
						1355040	G	A	C							1336284	A	G	N		713742	G	A	N		834108	A	C	C
						1355143	C	A	C							1337048	G	T	C		713936	G	A	N		834192	G	A	C
						1355651	G	A	N							1338097	T	G	N		714263	G	A	N		834991	A	T	N
						1355688	C	T	N							1338211	T	G	N		714265	G	C	N		835089	A	T	N
						1355777	A	C	N							1338232	C	A	N		714397	T	A	N		835158	A	T	N
						1357731	A	G	N							1338340	A	T	N		714417	G	A	N		835186	T	A	N
						1358169	C	A	C							1338341	C	A	N		714429	A	C	N		835215	A	T	C
						1358271	A	T	C							1338620	G	A	N		714436	C	T	N		836257	C	T	C
						1358319	C	A	C							1339192	C	T	N		714490	C	T	N		836294	C	T	C
						1358322	G	A	C							1339209	A	G	N		714552	T	G	N		836621	G	A	C
						1358334	C	T	C							1339656	C	T	N		714754	T	C	N		837944	G	A	C
						1358422	A	G	C							1339772	G	A	N		714879	C	T	N		838505	C	T	C
						1358577	C	T	C							1339791	T	C	N		714883	A	C	N		838589	G	C	C
						1359117	A	G	C							1339941	G	A	N		714916	A	C	N		839195	T	C	C
						1359171	T	C	C							1340066	A	G	N		714948	C	T	N		842874	G	A	N
						1360359	C	T	C							1340227	A	T	N		714955	G	A	N		843074	C	A	N
						1360527	G	A	C							1340330	G	T	N		715064	A	T	N		843538	A	G	N
						1360843	G	A	C							1340594	T	A	C		715069	C	T	N		849660	C	A	N
						1363028	G	A	C							1340619	C	T	C		715142	G	C	N		851208	T	C	N
						1363091	C	T	C							1341081	G	A	C		715176	C	A	N		851328	G	A	N
						1363219	G	A	N							1341538	A	G	C		715438	T	C	C		851476	T	A	N
						1363369	A	T	N							1342322	C	G	C		716199	G	A	N		852013	C	G	N
						1363400	G	T	N							1345192	T	A	C		716212	G	A	N		852034	A	G	N
						1363574	A	T	C							1345374	A	T	C		716629	C	T	C		852042	A	G	N
						1363577	A	T	C							1363608	A	G	C		716653	T	A	C		852062	C	T	N
						1363841	G	A	C							1365136	T	C	C		717112	A	C	C		852138	G	T	N
						1363844	G	A	C							1366854	T	A	C		717114	G	A	C		852146	C	T	N
						1363894	A	C	C							1366911	A	G	C		717898	C	T	C		852179	C	T	N
						1364010	A	T	C							1367288	A	G	C		717913	A	G	C		852216	G	C	N
						1364030	T	A	C							1367444	G	T	C		717972	T	C	C		852273	T	C	N
						1364168	G	A	C							1367876	G	A	C		718500	T	C	N		852302	C	A	N
						1364569	C	A	N							1367903	G	C	C		718680	T	G	N		852305	C	G	N
						1364570	C	A	N							1368001	A	G	C		718701	T	G	N		852510	C	A	N
						1364580	G	A	N							1368015	T	C	C		718702	T	A	N		854715	A	G	C
						1364581	G	A	N							1368083	C	T	C		718858	C	T	N		854879	A	G	N
						1364582	G	A	N							1368337	G	T	C		719073	G	A	N		855256	T	C	C
						1364583	G	A	N							1368384	C	G	C		719213	T	C	N		856225	T	C	C
						1364584	G	A	N							1370136	C	A	C		719244	A	G	N		856254	C	A	C
						1364585	T	A	N							1370481	C	A	N		719310	A	G	N		858593	C	T	C
						1364589	T	A	N							1370492	C	T	N		719315	T	A	N		860331	C	T	C
						1364590	T	G	N							1371323	A	T	C		719316	G	A	N		861351	A	T	C
						1364591	T	G	N							1377385	C	T	C		719318	T	G	N		861363	T	C	C
						1364592	A	G	N							1377562	A	G	C		719376	G	A	N		861508	T	C	C
						1364594	A	G	N							1379070	C	T	C		719384	T	A	N		861850	C	A	C
						1364616	A	G	N							1381218	A	G	C		719409	C	T	N		861930	C	T	C
						1364617	C	T	N							1382888	G	C	C		719533	A	G	N		862011	G	T	C
						1366024	T	A	C							1383570	A	T	C		719604	G	A	N		862234	T	G	N
						1366213	A	T	C							1384234	T	C	N		719642	C	T	N		862269	A	T	N
						1366507	C	T	C							1384508	G	A	C		719757	C	G	N		862286	T	A	N
						1366706	A	T	C							1384542	T	C	C		719928	T	C	N		862469	T	A	N
						1367990	A	G	N							1385288	A	C	C		719938	C	G	N		862523	C	T	N
						1377967	T	C	N							1386243	T	C	C		720236	T	G	C		863108	C	T	C
						1378112	C	T	N							1386320	G	C	C		720246	G	A	C		883568	A	G	N
						1378162	G	T	N							1387800	C	T	N		720362	G	A	C		883569	T	C	N
						1378510	C	A	N							1387925	T	C	N		720407	C	T	C		883571	C	A	N
						1378550	A	G	N							1388088	T	C	C		720755	G	A	C		883769	G	A	N
						1378706	C	T	N							1388125	C	T	C		720890	T	C	C		883798	A	C	N
						1378751	A	T	N							1388143	T	C	C		721710	G	T	C		883812	C	T	N
						1378752	C	A	N							1388236	A	T	C		721865	A	G	C		883845	G	C	N
						1378753	T	A	N							1390606	T	C	N		721867	T	C	C		885237	A	G	C
						1379185	A	C	C							1390998	T	C	N		721902	C	T	C		885740	T	C	C
						1379399	T	A	C							1395243	C	T	N		722550	T	C	N		885758	C	T	C
						1379429	T	C	C							1407046	G	A	C		722907	T	G	N		885927	G	T	N
						1379487	A	C	C							1407283	T	C	C		723028	T	C	N		885971	T	C	N
						1383699	G	T	C							1407488	G	A	C		723095	T	A	C		886013	G	T	N
						1384007	G	A	C							1407587	A	G	C		723132	T	G	C		886096	A	G	N
						1388211	T	G	N							1407613	G	A	C		723154	A	G	C		886375	C	T	C
						1388220	G	A	N							1407677	G	A	C		723174	G	A	C		886528	A	G	C
						1388291	A	G	N							1407694	C	T	C		723175	C	T	C		886846	C	T	C
						1388292	A	G	N							1407718	G	A	C		723271	T	C	C		887224	T	C	C
						1388336	C	T	N							1407962	G	A	C		723296	G	A	C		887272	A	G	C
						1388481	A	G	N							1408043	G	A	C		723485	A	G	N		887499	T	A	C
						1388640	A	T	N							1409934	G	A	C		723505	T	C	N		887739	A	G	N
						1388681	G	C	N							1410852	G	T	N		723628	A	T	N		887756	A	G	N
						1388887	T	A	N							1411035	G	A	N		723629	A	C	N		889250	A	G	C
						1388894	A	G	N							1411449	G	A	N		723750	A	C	N		889306	T	C	C
						1388971	G	C	N							1416821	A	T	C		723759	T	A	N		890457	C	A	C
						1389042	T	C	N							1417405	A	T	C		723787	A	T	N		890733	G	A	C
						1389349	T	A	N							1417439	C	T	C		724145	A	G	C		891105	T	G	C
						1389355	A	G	N							1417558	C	T	C		724321	A	G	C		891106	A	C	C
						1389358	A	G	N							1418954	C	G	C		724609	A	C	C		891109	C	G	C
						1389478	G	A	N							1419023	G	A	N		724615	A	C	C		891155	A	G	C
						1389486	C	A	N							1420231	C	T	C		724616	A	C	C		891677	C	G	C
						1389563	C	A	N							1420444	A	G	C		724618	A	C	C		891920	G	T	C
						1389979	A	G	N							1425221	G	A	C		728638	A	G	N		891968	G	A	C
						1390133	T	C	C							1425798	C	A	C		731699	C	A	C		892277	A	G	C
						1390224	T	C	C							1426688	G	A	C		731909	T	C	N		892378	C	A	N
						1390336	A	G	C							1427580	C	T	C		731925	A	T	N		892470	G	A	C
						1390567	A	C	C							1427600	A	G	C		737204	G	A	C		892496	G	A	C
						1390574	C	T	C							1427838	C	T	C		737231	G	A	C		892505	T	C	C
						1390582	T	C	C							1428689	T	A	C		737596	C	T	C		892963	A	T	C
						1390631	C	T	C							1428710	T	C	C		737684	A	T	C		893100	G	A	C
						1390634	T	C	C							1428880	C	T	N		737702	C	T	C		893208	T	G	C
						1390788	G	A	C							1428941	G	T	N		737786	A	G	C		893211	T	G	C
						1390876	C	A	C							1429001	G	T	N		738757	C	G	C		893214	T	G	C
						1391063	A	T	C							1429528	A	G	N		738830	G	A	C		893238	G	C	C
						1391108	C	A	C							1429644	A	T	N		738836	C	T	C		893244	G	C	C
						1391165	T	C	C							1429722	C	A	C		738873	C	T	C		893848	G	A	N
						1391323	A	T	C							1431026	C	A	C		738875	A	T	C		893856	G	A	N
						1391363	G	T	C							1431959	T	C	N		738984	A	G	C		893894	G	A	N
						1391441	G	A	C							1432365	G	T	C		739297	T	C	C		893908	A	G	N
						1391444	A	G	C							1432438	C	T	C		739327	C	T	C		895623	G	A	C
						1391617	C	A	C							1432644	A	T	C		739444	C	T	C		895688	T	C	C
						1391654	A	G	C							1433236	T	C	N		739469	T	C	C		896339	A	G	N
						1391663	T	C	C							1433506	A	T	C		739478	G	A	C		896346	T	C	N
						1392303	G	A	C							1433614	C	A	C		739938	A	T	N		896349	G	A	N
						1392314	T	C	C							1433804	G	A	N		740170	A	C	N		896355	G	A	N
						1392404	T	G	C							1435098	A	T	N		740198	T	C	N		896482	C	T	N
						1392420	A	C	C							1435184	C	T	N		740291	A	G	N		896587	C	T	N
						1392516	G	A	N							1435232	A	G	N		740514	G	A	N		896588	T	C	N
						1392520	T	C	N							1435285	G	A	N		740659	G	A	N		896597	C	A	N
						1392523	A	G	N							1435309	A	C	N		740807	T	G	N		896598	C	A	N
						1392621	A	G	N							1435343	G	A	N		740822	C	T	N		896599	T	A	N
						1393030	T	G	C							1435357	T	C	N		740945	A	G	N		896940	A	T	N
						1393254	A	C	C							1435387	A	T	N		740952	A	G	N		896941	A	C	N
						1393274	G	A	C							1435388	C	T	N		740960	T	C	N		896944	G	T	N
						1395370	T	C	N							1435396	A	G	N		741065	A	G	N		896996	A	G	N
						1395391	T	C	N							1435398	C	T	N		741092	G	A	N		897038	T	C	N
						1395500	A	G	N							1435711	T	G	N		741182	G	A	N		897067	T	C	N
						1396004	C	T	C							1435768	C	G	N		741258	G	A	N		897081	G	C	N
						1396017	G	A	C							1435841	C	T	N		741294	T	C	N		897126	A	G	N
						1396096	A	G	C							1436027	T	C	N		741306	G	A	N		897141	C	A	N
						1396195	T	C	C							1436146	T	C	N		741587	A	T	N		897200	A	C	N
						1396207	G	C	C							1436282	G	T	N		741644	G	A	N		897201	C	T	N
						1396328	A	T	C							1436294	G	A	N		742099	G	A	N		897290	A	C	N
						1396456	G	A	C							1436387	G	A	N		742406	T	A	N		897345	C	T	N
						1396469	A	G	C							1436388	G	A	N		742595	C	T	N		897354	A	G	N
						1396618	T	A	C							1439646	T	G	N		743477	C	A	N		897360	C	A	N
						1396638	A	G	C							1439647	T	C	N		743531	A	G	N		897361	C	G	N
						1396876	G	C	N							1442475	A	G	C		743634	A	C	N		897367	T	C	N
						1396907	A	G	N							1442781	A	G	N		743797	C	T	N		897464	C	A	N
						1397247	A	T	C							1442782	C	G	N		743889	C	T	C		897465	T	A	N
						1397289	G	C	C							1442790	A	G	N		744158	T	C	C		897674	C	G	N
						1397325	A	G	C							1442916	G	C	N		744232	A	T	C		897747	T	G	N
						1397514	C	T	C							1442922	C	G	N		744475	A	T	C		897796	C	T	N
						1397641	A	T	C							1442930	C	A	N		744760	A	C	C		897945	A	G	N
						1398120	G	A	C							1442950	T	C	N		745493	G	A	C		897967	C	A	N
						1398488	A	G	C							1442995	G	T	N		745688	T	G	C		897969	C	T	N
						1398489	T	A	C							1443165	T	C	C		746213	A	T	N		897972	C	T	N
						1398664	G	A	N							1443486	T	C	C		746239	G	A	N		897977	C	T	N
						1398744	A	T	N							1443888	T	C	C		746243	G	C	N		897979	C	A	N
						1399147	T	A	N							1444482	A	C	C		746245	A	G	N		897984	T	A	N
						1399199	C	G	C							1445153	T	C	N		746257	G	T	N		897996	G	A	N
						1399427	C	T	C							1445541	C	T	N		746262	C	T	N		897997	G	T	N
						1399429	A	T	C							1445600	C	A	N		746426	T	C	N		897999	A	C	N
						1399913	T	C	C							1445621	G	T	N		747024	C	T	C		898002	G	C	N
						1400058	G	A	N							1445633	A	T	N		747459	C	T	C		898276	A	C	N
						1400400	C	A	N							1445887	T	C	N		748887	C	T	C		898525	C	A	N
						1400404	A	G	N							1446020	A	G	N		755502	A	G	N		898549	A	C	N
						1400488	T	A	N							1446256	G	A	N		755517	T	A	N		898554	A	T	N
						1400524	T	A	N							1446286	A	C	N		755568	T	C	N		898596	T	G	N
						1400584	T	C	N							1447361	A	G	N		755707	A	G	N		898689	T	C	N
						1400619	G	T	N							1447537	A	T	N		758686	A	G	N		898692	G	A	N
						1402600	C	T	N							1448970	G	C	N		758694	A	G	N		898711	C	T	N
						1402666	G	C	N							1449049	A	G	N		783626	A	G	N		898726	C	T	N
						1402899	A	G	N							1449567	G	A	C		783644	C	T	N		898752	A	G	N
						1402907	T	C	N							1449964	G	A	N		783717	A	G	N		899194	C	A	C
						1402990	C	T	N							1450105	T	C	N		783793	C	T	N		899206	A	C	C
						1403003	C	T	N							1450279	G	A	C		784196	A	T	N		899208	C	G	C
						1403026	A	G	N							1450293	T	A	C		784311	T	A	N		899209	A	C	C
						1403116	C	G	N							1451055	C	T	C		784504	G	A	C		899210	A	T	C
						1403127	C	T	N							1451170	A	T	C		785236	G	A	C		899249	G	A	C
						1403187	A	G	C							1451203	A	C	C		785519	C	T	C		899260	C	A	C
						1403292	G	A	C							1451417	A	G	C		785692	C	T	N		899276	A	T	C
						1404604	G	A	C							1451425	A	G	C		785696	A	C	N		899356	G	T	C
						1405451	A	G	C							1451892	G	A	C		786906	T	A	N		899505	G	A	C
						1405713	G	A	C							1452180	T	A	C		787040	T	G	N		899527	C	A	C
						1405865	G	A	C							1452183	T	A	C		787468	C	T	C		899528	A	G	C
						1406297	G	C	C							1452190	A	G	C		787995	C	T	C		899533	A	C	C
						1406537	G	A	C							1452197	A	G	C		789597	T	G	N		899546	T	A	C
						1406561	C	A	C							1452429	A	T	C		789666	A	G	N		899547	T	C	C
						1406633	C	G	C							1452639	G	A	C		790122	C	T	N		899549	T	A	C
						1406669	G	A	C							1452751	A	G	N		790327	A	G	N		899556	T	A	C
						1407578	C	T	C							1453363	G	A	N		790329	T	C	N		899568	G	C	C
						1407608	A	G	C							1453389	A	T	N		790811	A	G	N		899569	C	A	C
						1407738	C	T	C							1453403	C	G	N		790814	C	G	N		899570	T	A	C
						1408134	T	G	N							1453628	G	T	N		791403	T	C	N		899573	T	A	C
						1408925	G	A	C							1453710	A	G	N		791532	A	G	N		899575	G	A	C
						1409062	T	C	C							1453776	A	G	N		791535	A	G	N		899576	T	C	C
						1409875	C	T	C							1454778	A	G	N		791609	T	G	N		899577	G	T	C
						1409935	G	A	C							1454878	C	A	N		791614	T	C	N		899578	G	A	C
						1411031	A	G	C							1457524	G	A	C		791725	A	G	N		899580	A	C	C
						1411276	C	G	N							1458265	A	G	C		791751	C	G	N		899582	T	A	C
						1411304	A	T	N							1458284	C	A	C		792069	T	A	N		899584	G	C	C
						1411377	T	C	N							1458398	A	G	C		792190	A	T	N		899851	A	G	N
						1411581	A	G	N							1458508	C	T	N		792400	C	T	C		900051	C	A	N
						1411727	A	G	N							1458509	T	A	N		792478	T	C	C		900212	T	G	N
						1411818	T	A	N							1458557	A	G	N		792508	G	T	C		900325	A	T	N
						1411857	G	A	N							1458632	C	T	N		793599	T	C	C		900596	A	C	N
						1411869	A	G	N							1458669	A	G	N		794340	T	C	C		900601	A	C	N
						1412010	T	C	N							1458895	G	A	N		794796	G	A	C		900603	T	C	N
						1412128	T	A	N							1458904	A	T	N		795486	T	C	C		900651	G	T	N
						1412304	C	T	N							1459350	G	T	C		795507	A	G	C		900661	T	C	N
						1412672	T	G	N							1460235	G	T	C		795643	C	T	N		900700	G	A	N
						1413483	T	C	N							1460264	C	T	C		795780	A	G	N		900738	T	G	N
						1413520	T	G	N							1460270	C	T	C		795919	A	T	N		900827	T	C	N
						1413704	T	C	C							1460610	A	T	C		795921	C	T	N		900910	A	C	N
						1413796	T	A	C							1461135	A	C	N		795988	C	A	N		901115	T	A	N
						1413815	T	A	C							1461138	A	G	N		796052	T	C	N		901151	A	G	N
						1413860	C	T	C							1461158	C	T	N		796150	G	T	N		901292	T	C	N
						1414001	T	C	C							1461358	A	T	N		796252	T	G	N		901297	G	A	N
						1414130	A	C	C							1461363	A	G	N		797338	A	G	C		901322	C	T	N
						1414169	T	C	C							1462493	A	T	C		797368	A	G	C		901391	A	T	N
						1414299	C	T	C							1462695	G	C	N		797753	A	G	N		901448	C	G	N
						1414781	G	A	C							1462813	A	G	N		797943	A	G	N		901509	C	G	N
						1414969	T	A	C							1463015	T	C	C		798021	A	G	N		901511	G	A	N
						1414972	C	A	C							1463432	A	T	C		798025	C	T	N		901514	G	T	N
						1414977	G	C	C							1463460	C	G	N		798036	A	G	N		902612	G	A	C
						1415033	T	C	C							1463629	A	C	C		798154	T	C	N		902694	C	T	C
						1415150	A	C	C							1463632	C	A	C		798705	A	T	C		903219	C	T	N
						1415162	G	A	C							1463635	T	C	C		798738	G	A	C		903525	C	T	C
						1415653	A	G	C							1463638	C	T	C		799110	A	T	N		903532	C	T	C
						1415817	A	G	C							1463641	A	C	C		799313	G	A	N		903718	G	A	C
						1416095	G	A	C							1463644	C	T	C		799412	G	A	N		915910	G	A	N
						1416443	T	C	C							1463647	T	C	C		799484	T	A	N		915992	C	T	N
						1416557	A	G	C							1463681	T	C	C		800151	A	G	C		916021	A	C	N
						1420442	C	T	C							1463683	G	C	C		800213	G	A	C		916663	A	G	N
						1420902	C	A	C							1463767	T	A	C		800480	C	T	C		916701	C	T	N
						1421100	C	T	C							1463882	A	T	C		800483	T	C	C		916775	T	C	N
						1421113	G	T	C							1464221	G	A	C		800486	C	T	C		916794	C	G	N
						1421208	C	T	C							1464253	A	G	N		801453	C	T	N		916860	T	A	N
						1421293	T	G	N							1464254	G	A	N		801551	T	G	N		916897	A	C	N
						1421524	C	T	N							1464316	T	G	N		801605	T	A	N		917018	T	A	N
						1422229	G	A	C							1464432	T	A	N		801606	G	A	N		917061	A	C	N
						1422306	A	G	C							1464518	T	C	N		804423	G	T	N		917082	C	T	N
						1422345	G	A	C							1464536	A	G	N		804641	A	C	N		917292	C	T	C
						1422440	C	T	C							1464544	A	G	N		804774	G	A	N		917355	A	G	C
						1422456	A	G	C							1464563	G	A	N		804777	C	G	N		927712	T	G	C
						1422525	G	A	C							1464566	G	A	N		804778	T	C	N		927714	T	C	C
						1422710	A	G	N							1464649	G	A	N		805090	A	T	N		927965	A	G	C
						1422759	C	T	N							1464672	A	T	N		811648	G	A	C		928644	A	C	N
						1422788	T	C	N							1464677	C	A	N		811652	T	C	C		929035	A	G	N
						1422789	C	T	N							1464685	C	T	N		812870	T	C	C		929386	A	G	N
						1422805	T	A	N							1464735	T	C	N		812927	C	T	C		929783	T	G	N
						1422867	C	T	N							1464771	G	A	N		813290	C	T	C		930010	A	G	N
						1422868	C	G	N							1464798	A	G	N		814280	G	T	C		930046	T	C	N
						1422919	C	A	N							1464848	T	C	N		815228	A	T	C		930067	G	A	N
						1423020	C	T	N							1464869	T	A	N		815787	C	T	C		930080	A	C	N
						1423043	G	C	N							1467905	T	C	N		815894	C	T	C		930127	C	T	N
						1423600	T	C	C							1470332	A	G	N		815990	C	T	N		930249	C	T	N
						1424042	C	T	N							1470485	C	T	N		816328	C	G	N		930297	T	C	N
						1425840	T	C	C							1470545	G	T	N		816350	G	A	N		930390	A	G	N
						1425843	T	G	C							1470546	A	T	N		816434	G	C	N		930466	G	A	N
						1425844	G	T	C							1470547	A	C	N		816501	T	C	N		930504	C	A	N
						1425847	T	G	C							1470594	T	G	N		816523	G	A	N		930529	C	T	N
						1425852	T	C	C							1470709	A	T	N		816964	C	G	N		930617	T	C	N
						1425855	C	T	C							1470771	C	T	N		817253	C	T	N		930634	T	C	N
						1425862	G	A	C							1470778	G	A	N		817258	A	T	N		930676	A	C	N
						1425864	C	T	C							1470779	A	T	N		817315	A	G	N		930682	C	T	N
						1426062	A	G	C							1470788	C	G	N		817484	C	T	N		930905	C	G	N
						1426542	A	G	C							1470800	A	T	N		817588	T	A	N		931146	C	G	N
						1426696	A	G	N							1470806	A	G	N		817633	A	T	N		931322	A	G	N
						1426754	A	T	N							1470841	A	G	N		817865	A	C	N		931427	C	T	N
						1426810	T	C	N							1470892	G	C	N		817870	C	T	N		931485	C	A	N
						1426821	G	A	N							1471662	T	G	N		817873	A	C	N		931530	T	C	N
						1426916	A	G	N							1471860	T	G	N		818367	C	T	C		931601	G	A	N
						1427187	A	G	N							1472040	T	C	N		818733	T	C	C		931614	C	T	N
						1427282	T	A	N							1472161	G	A	N		818736	G	A	C		931624	T	G	N
						1427479	A	T	N							1472266	G	A	N		818919	T	C	C		931636	G	T	N
						1427514	A	G	N							1474036	A	C	C		819030	C	T	C		931642	G	T	N
						1427785	C	T	N							1474115	T	A	C		819284	T	C	N		931646	A	G	N
						1427786	G	T	N							1474116	G	C	C		819404	T	A	N		932003	T	C	N
						1427867	G	A	N							1474117	T	C	C		819444	C	T	N		932028	G	A	N
						1428020	A	G	N							1474120	A	T	C		819516	C	T	N		932075	T	C	N
						1428050	C	A	N							1474123	C	T	C		819604	G	A	C		932331	G	A	N
						1428462	C	T	C							1474126	T	A	C		820011	A	G	C		932422	T	C	N
						1428708	A	G	C							1474127	A	G	C		820090	G	A	N		932516	G	C	N
						1428915	G	A	C							1474129	C	T	C		820151	T	G	N		932531	T	A	N
						1428924	G	A	C							1474133	G	T	C		820173	C	T	N		932532	C	A	N
						1428965	A	G	C							1474134	C	G	C		820813	T	G	N		932540	A	C	N
						1429743	G	C	C							1474168	T	A	C		820816	G	T	N		932548	C	A	N
						1429761	C	T	C							1474171	A	T	C		820895	C	T	N		932776	T	C	C
						1430343	G	A	N							1474174	T	A	C		820904	T	C	N		934266	A	G	C
						1431400	C	T	C							1474273	T	G	N		821025	A	G	C		934408	T	C	C
						1431813	T	G	N							1482613	A	T	C		821038	T	A	C		934423	T	C	C
						1431843	A	T	N							1483985	G	A	C		821049	G	A	C		934814	C	T	C
						1431862	C	T	N							1484047	G	A	C		821062	C	A	C		935050	A	G	C
						1431931	T	C	N							1484114	A	G	C		821145	A	G	C		936118	T	C	C
						1431940	T	G	N							1484156	G	A	C		824227	C	T	C		936574	C	T	C
						1432025	T	C	N							1484287	A	G	C		824590	T	G	C		956017	C	T	C
						1432070	T	C	N							1484299	T	C	C		824631	T	C	N		960804	T	C	C
						1432398	C	T	C							1484301	C	T	C		825455	A	G	N		961138	T	C	C
						1432503	T	C	C							1484625	A	G	C		828271	G	A	C		961749	C	G	C
						1433266	C	T	N							1484629	C	A	C		828923	T	C	N		962273	C	T	C
						1433368	G	A	N							1484830	G	A	N		828954	A	G	N		964769	G	A	N
						1433556	A	G	N							1485398	G	A	N		829728	C	T	N		964971	G	A	N
						1433642	A	G	N							1485402	G	T	N		832192	T	A	N		964972	T	G	N
						1433853	T	C	C							1485411	A	G	N		833584	A	T	C		965323	A	G	N
						1437197	C	T	N							1485483	G	C	N		833656	T	G	C		965925	C	A	C
						1437382	A	G	N							1485602	T	A	N		833849	C	T	C		970309	A	C	N
						1437529	G	C	N							1485608	A	G	N		833886	A	T	N		970545	C	T	N
						1438202	A	T	N							1485668	A	C	N		833887	C	T	N		970709	T	A	N
						1438272	T	A	N							1485685	C	T	N		834454	A	C	C		970809	T	C	N
						1446860	A	G	C							1485883	A	G	N		834976	T	G	C		971963	C	T	C
						1447761	G	A	C							1485924	A	G	N		836027	T	C	N		972824	T	C	N
						1448559	T	C	C							1485925	A	G	N		836158	G	A	N		973070	G	A	N
						1449120	T	C	N							1485928	A	G	N		836170	T	C	N		973244	A	T	N
						1449598	G	C	C							1485992	C	T	N		836181	C	T	N		973271	T	C	N
						1449855	C	A	C							1486007	G	A	N		836201	G	T	N		974673	G	A	C
						1449876	A	G	C							1486098	G	A	N		836205	C	A	N		974712	T	A	C
						1450040	C	T	C							1486111	T	C	N		836234	G	A	C		975542	T	A	C
						1450080	G	A	C							1486134	G	T	N		836258	G	A	C		975561	T	C	C
						1451124	G	A	N							1486189	G	T	N		836648	G	C	C		975765	T	A	N
						1451191	C	A	N							1486238	A	C	N		836864	T	A	C		975930	C	T	N
						1451356	A	C	C							1486493	T	C	C		837173	A	G	C		976660	T	C	N
						1451880	G	A	C							1487852	C	T	C		838647	T	A	C		976746	G	A	N
						1451967	C	T	C							1488199	T	C	N		838659	C	T	C		976795	T	C	N
						1453180	C	T	C							1488628	T	C	N		838960	T	G	C		976802	A	C	N
						1473580	A	G	N							1489058	A	C	N		839832	G	T	C		976841	C	T	N
						1473702	A	G	N							1491339	T	C	N		840205	A	T	N		976876	A	G	N
						1474284	G	A	N							1491362	A	C	N		840218	T	C	N		977223	G	T	N
						1474353	A	G	N							1491373	A	G	N		840313	C	G	N		977443	T	C	N
						1474381	C	T	N							1491511	G	A	N		841287	T	C	C		977444	G	T	N
						1474505	A	C	N							1491533	T	C	N		842168	C	T	C		977687	G	T	N
						1474531	G	A	N							1491648	C	T	N		844103	A	C	C		977901	A	G	N
						1474562	C	T	N							1491945	C	A	N		849677	C	T	N		977921	G	A	N
						1474663	T	C	N							1492136	A	C	N		849688	G	A	N		978177	T	C	N
						1474750	G	C	N							1492142	G	A	N		849738	A	G	N		978354	G	A	N
						1474842	T	C	N							1492195	A	G	N		850529	A	G	C		978727	G	A	C
						1474953	A	C	N							1492366	C	T	N		850644	G	A	C		978735	A	G	C
						1474982	G	C	N							1492408	C	T	N		850696	C	T	C		978772	C	A	C
						1475359	A	C	C							1492428	T	C	N		850765	T	C	C		978926	C	T	C
						1475398	T	C	C							1492444	A	G	N		850998	C	G	C		978927	T	C	C
						1478112	A	G	C							1492582	C	G	N		851034	A	G	C		978989	T	A	C
						1478347	T	A	C							1492627	G	C	N		851629	C	T	C		979010	G	A	C
						1478421	C	T	C							1492701	G	A	N		851651	A	G	C		979307	C	T	C
						1478439	T	C	C							1492784	A	C	N		851671	A	G	C		979308	C	T	C
						1478475	A	T	C							1492929	G	A	N		851693	C	T	C		979416	G	A	N
						1478634	A	G	C							1493238	G	A	N		851814	C	A	C		979482	C	G	N
						1478870	A	G	C							1493957	A	G	N		851898	C	A	C		979573	A	C	N
						1479480	T	C	N							1494535	T	C	C		852133	C	T	C		980654	G	A	C
						1479623	C	G	N							1494679	C	T	C		852222	G	A	C		981221	C	T	C
						1484866	G	A	C							1499756	A	T	C		852263	C	T	C		982185	T	C	C
						1485541	T	G	N							1502834	T	C	C		852341	T	G	C		982418	T	C	C
						1486218	G	C	C							1503386	T	C	N		852524	G	A	C		982729	T	C	N
						1486223	A	G	C							1503397	T	C	N		852630	T	C	N		983601	A	G	C
						1486532	C	A	C							1503488	T	C	N		853051	T	G	N		983690	C	T	C
						1486824	T	C	C							1503571	C	G	N		853174	C	T	C		983976	C	T	C
						1486912	C	T	C							1503697	T	C	N		853183	C	T	C		984867	C	T	C
						1487408	T	C	N							1503707	T	A	N		854405	T	C	C		986725	A	C	C
						1487513	A	G	N							1503720	A	G	N		855051	C	T	C		987076	A	T	C
						1487519	G	A	N							1503744	A	G	N		855214	A	G	C		987343	T	C	C
						1487657	T	A	C							1503870	T	A	N		855956	C	T	C		987565	A	G	C
						1487693	T	C	C							1503907	A	C	N		856425	C	T	N		987661	A	C	C
						1487930	G	C	C							1503934	G	A	N		856488	G	A	N		987814	A	G	C
						1490474	T	C	C							1503967	T	C	N		856584	C	T	N		987964	A	C	C
						1491493	A	G	N							1504028	C	T	N		856717	A	G	N		988189	G	A	C
						1491552	C	T	N							1504097	T	A	N		856829	G	A	N		988267	G	A	C
						1491718	C	A	C							1504099	T	C	N		856901	C	T	N		988413	A	T	C
						1494704	C	T	C							1504102	T	C	N		856958	C	T	N		989212	C	T	N
						1495708	G	A	C							1504103	T	A	N		857092	T	C	C		989298	G	A	N
						1500052	G	A	C							1504105	T	C	N		857100	A	T	C		989596	G	T	N
						1500079	A	T	C							1504107	A	G	N		857504	C	T	C		990445	A	G	N
						1500562	G	A	C							1504121	C	T	N		857505	T	G	C		993260	G	A	C
						1500571	A	G	C							1504177	A	T	N		857534	G	T	C		993304	C	T	C
						1500580	G	T	C							1504264	G	A	N		857983	A	G	C		993336	C	T	C
						1500650	C	T	N							1504284	G	T	N		858034	G	T	C		993343	T	C	C
						1505301	T	C	C							1508645	A	G	N		858618	C	T	N		994357	T	G	N
						1505367	G	A	C							1509207	C	T	N		858873	C	A	C		994499	T	C	N
						1505876	T	C	C							1509973	G	A	C		859067	A	G	C		994652	C	T	N
						1506708	T	G	C							1510136	T	G	C		859687	A	C	C		994798	A	G	N
						1507109	A	T	C							1510756	A	T	N		859981	G	A	C		994824	G	A	N
						1507205	T	A	C							1510766	A	G	N		860226	C	T	C		995358	T	C	N
						1507534	T	A	C							1510841	A	C	C		860652	T	C	N		995367	A	T	N
						1507549	T	C	C							1511373	G	A	C		860842	A	G	N		1002477	G	C	N
						1507572	G	A	C							1515260	C	A	C		860943	G	A	N		1002782	A	C	N
						1507688	A	C	C							1515302	T	C	C		861050	G	A	N		1002912	C	T	N
						1507724	A	T	C							1515332	G	A	C		861266	T	C	C		1002952	T	C	N
						1508006	T	C	N							1515392	C	T	C		861365	G	A	C		1002958	T	A	N
						1508554	A	G	C							1515416	T	C	C		861589	T	C	C		1003183	A	T	N
						1508608	A	G	C							1515497	T	C	C		861595	A	T	C		1003620	T	C	N
						1508644	T	C	C							1515761	G	A	C		861677	T	G	C		1003641	G	C	N
						1508841	C	A	C							1515780	A	G	C		863286	G	A	N		1003762	A	C	N
						1509402	G	A	N							1515863	T	A	C		870733	C	T	C		1003785	A	G	N
						1509508	G	A	N							1516052	G	A	C		875270	T	A	C		1004139	A	C	N
						1512829	A	G	C							1516174	G	A	C		875856	T	A	C		1004159	T	C	N
						1512903	T	C	C							1516206	C	A	C		876040	T	A	N		1004164	A	T	N
						1513013	C	T	C							1516291	T	A	C		876107	G	A	N		1004280	T	C	N
						1516937	T	C	N							1516458	T	A	N		876139	A	C	N		1004362	G	A	N
						1517068	T	C	N							1516924	G	A	C		880850	T	C	C		1004392	G	C	N
						1517092	C	T	N							1517035	A	G	C		880886	G	A	C		1004451	A	C	N
						1517139	C	T	N							1521578	G	A	C		880943	G	T	C		1004507	C	T	N
						1517652	T	C	C							1521698	T	G	C		880988	T	C	C		1004528	A	T	N
						1517686	T	C	C							1521796	T	A	N		881115	A	G	C		1004532	T	A	N
						1517850	A	G	C							1522106	A	G	N		881250	A	T	C		1004533	G	A	N
						1517958	C	T	C							1522137	T	G	N		881486	A	G	C		1004566	G	T	N
						1518462	T	C	C							1522225	G	C	N		881636	C	A	N		1004681	C	A	N
						1518777	G	C	C							1523830	G	A	C		881655	T	C	N		1004787	C	G	N
						1518792	C	T	C							1523917	C	T	C		881689	A	C	N		1004803	A	G	N
						1520528	G	A	C							1524607	C	T	C		881756	T	C	N		1004869	C	T	N
						1523368	T	C	C							1524735	T	A	N		881760	T	A	N		1004919	G	A	N
						1523574	A	G	C							1524887	G	A	N		881792	A	G	N		1006521	G	A	N
						1523768	A	G	C							1524963	T	C	N		881826	T	G	N		1006596	T	G	N
						1523797	C	T	C							1525020	A	T	N		881835	G	A	N		1007152	G	T	N
						1523874	C	G	N							1525030	G	A	N		882132	A	C	N		1007209	A	C	N
						1523891	C	A	N							1525662	A	T	N		882202	C	T	N		1007242	G	A	N
						1525015	T	C	C							1526688	C	T	C		882252	T	A	N		1007243	A	T	N
						1525087	T	A	C							1526994	C	T	C		882464	A	C	N		1007574	T	A	N
						1525315	G	A	C							1527409	G	A	N		882494	T	G	N		1007632	T	C	N
						1525752	T	C	N							1528584	A	G	C		882500	G	A	N		1007803	A	G	N
						1525907	C	A	N							1528679	T	G	C		882531	C	T	N		1007833	C	T	N
						1526122	T	C	N							1528684	T	C	C		882534	C	A	N		1021893	C	T	C
						1526308	G	A	C							1528949	C	A	C		882653	C	T	N
						1526623	T	A	C							1529077	C	T	C		882663	C	T	N
						1526668	A	G	C							1529132	A	C	C		882707	A	T	N
						1529306	A	G	C							1529427	C	G	C		882720	G	A	N
						1529311	C	T	C							1529571	T	C	C		882728	C	T	N
						1529842	G	A	C							1529696	T	C	C		883031	C	T	N
						1529889	A	G	C							1530670	A	G	N		883254	A	T	N
						1529939	T	C	C							1531715	A	G	N		883340	A	G	N
						1530094	A	G	C							1531920	C	A	N		883767	G	A	N
						1530141	C	A	C							1532151	C	T	N		883768	A	C	N
						1530180	G	A	C							1532390	A	T	C		883860	G	T	N
						1530210	C	T	C							1532894	T	C	C		883911	A	G	N
						1530241	T	C	C							1533586	G	A	N		883962	T	G	N
						1530326	G	T	C							1537478	C	T	C		884073	A	T	N
						1530333	G	C	C							1537868	T	A	C		884149	C	A	N
						1530790	G	A	C							1538236	A	T	C		884788	A	G	N
						1531676	A	G	C							1538295	A	G	C		885058	G	A	C
						1531846	A	G	C							1539071	T	C	N		885257	T	A	N
						1531961	T	C	C							1539272	A	T	N		885306	T	A	N
						1532130	A	T	C							1539284	G	A	N		885363	A	G	N
						1532404	C	T	C							1539328	G	T	N		885364	C	T	N
						1532844	T	A	C							1539339	C	T	N		885609	C	G	N
						1532855	T	C	C							1539378	G	C	N		885693	C	A	N
						1532939	A	G	C							1539403	G	A	N		885850	G	T	N
						1532957	A	G	C							1539707	A	G	N		886376	T	A	C
						1533089	G	A	C							1540347	A	T	N		886642	C	T	C
						1533967	G	A	N							1540384	T	C	N		886934	A	G	C
						1534683	G	A	C							1540486	G	A	N		887029	A	G	C
						1534794	T	C	C							1540521	A	G	N		887263	T	C	C
						1535151	A	T	C							1540566	G	A	N		887725	T	C	C
						1535516	A	G	C							1540716	A	G	N		887965	C	T	C
						1535722	A	C	C							1540718	A	G	N		888141	C	T	C
						1536211	A	G	C							1541084	T	C	N		888235	A	G	C
						1536392	T	A	N							1541096	A	G	N		888289	G	A	C
						1536478	T	C	N							1541410	C	A	N		888758	G	C	C
						1536800	C	T	C							1541414	T	C	N		888860	A	G	N
						1536972	G	A	C							1541523	T	A	N		888929	C	A	N
						1537244	T	C	C							1541646	C	T	N		888949	A	G	N
						1537758	C	T	C							1541860	A	T	N		889114	A	G	N
						1539578	A	T	N							1542293	G	A	N		889223	A	G	C
						1539997	G	C	C							1580946	A	G	N		889460	A	G	C
						1540451	A	G	N							1586495	T	G	N		890011	T	C	C
						1540452	C	T	N												890330	A	C	N
						1540464	C	T	N												890335	T	C	N
						1540632	C	T	N												890368	T	G	N
						1540762	C	T	N												890393	A	G	N
						1540938	A	G	C												890500	T	C	N
						1541297	G	A	N												890501	G	A	N
						1542929	G	A	C												890518	G	A	N
						1542931	G	A	C												890536	G	A	N
						1542939	G	A	C												890545	A	G	N
						1543315	T	C	C												890546	A	G	N
						1543456	T	G	C												890566	C	T	N
						1543576	T	C	C												890590	G	A	N
						1544316	G	A	C												890593	G	A	N
						1544757	C	T	C												890753	A	C	N
						1545064	G	T	C												890780	C	G	N
						1545085	A	G	C												890887	T	G	N
						1545619	C	T	C												890956	C	T	N
						1546639	T	G	C												891084	C	G	N
						1546743	G	A	C												891095	A	T	N
						1546963	G	A	C												891098	G	T	N
						1547092	G	A	C												891102	A	G	N
						1547497	C	T	C												891108	T	C	N
						1547560	C	T	C												891135	C	T	N
						1547907	G	A	N												891204	A	T	N
						1547998	T	A	N												891286	T	C	N
						1548052	C	A	N												891357	A	C	N
						1548103	G	A	N												891410	G	A	N
						1548350	T	C	N												891448	C	T	N
						1550168	T	C	C												891514	G	T	N
						1550183	A	C	C												891599	C	T	N
						1550258	C	T	C												891602	A	G	C
						1550313	C	A	N												891642	C	T	C
						1550316	C	A	N												891663	A	G	C
						1551021	A	G	C												891722	T	C	C
						1551943	G	A	N												891750	C	A	C
						1551970	T	A	N												892375	A	G	N
						1552256	G	C	C												892412	A	G	N
						1552594	G	T	N												892429	T	C	N
						1552814	G	T	N												892441	C	G	N
						1553993	T	C	C												892463	A	T	N
						1554119	G	A	C												892589	G	T	N
						1554149	G	A	C												892643	C	T	N
						1554364	C	T	C												894060	T	C	C
						1554395	G	C	C												897733	C	T	C
						1554773	G	T	N												897748	C	T	C
						1554883	C	G	N												897765	C	T	C
						1555708	A	G	C												897774	C	T	C
						1555710	C	A	C												899249	T	G	C
						1555717	A	G	C												899315	T	C	C
						1555850	A	G	C												899396	C	T	C
						1556253	T	C	C												899423	T	G	C
						1556958	G	A	C												899631	A	G	C
						1557180	T	A	C												899837	G	A	C
						1558076	C	G	C												899941	T	C	C
						1558595	A	G	C												900201	C	A	N
						1559309	C	A	C												905194	A	G	C
						1559797	A	G	C												905223	G	A	C
						1560485	C	G	N												905392	T	C	C
						1560517	G	T	N												905395	A	T	C
						1560690	C	T	N												905408	A	T	C
						1560695	T	C	N												905555	C	T	C
						1560736	G	A	N												905570	G	T	C
						1560806	A	G	N												905760	A	T	C
						1561182	C	T	N												906015	G	A	N
						1561309	G	A	C												906198	T	C	N
						1561744	A	G	C												906242	A	G	N
						1561948	G	A	C												906334	A	T	N
						1562212	G	T	C												906540	C	T	N
						1562398	C	T	C												906562	C	T	N
						1562460	T	C	C												906765	A	G	N
						1562864	A	G	C												906768	T	A	N
						1562869	A	G	C												906842	T	G	N
						1562960	C	A	C												906855	T	A	N
						1564540	G	A	C												906856	T	G	N
						1564613	G	A	C												906859	T	G	N
						1564793	C	G	N												906869	T	A	N
						1564856	G	T	N												907144	A	G	N
						1564875	A	T	N												907166	T	C	N
						1565196	G	A	C												907552	T	G	N
						1565619	A	C	C												907711	T	C	N
						1565693	C	T	C												907727	A	C	N
						1565763	T	C	C												907742	T	C	N
						1565787	G	A	C												907974	T	C	N
						1567083	A	G	C												908124	C	T	N
						1567147	T	C	C												908127	G	T	N
						1567224	A	T	C												908160	G	A	N
						1567281	G	T	C												908216	G	A	N
						1567290	G	A	C												908313	C	G	N
						1567475	G	C	C												908447	T	A	N
						1567758	C	T	C												908557	A	G	N
						1570005	T	C	C												909047	G	A	N
						1570077	A	G	C												909230	A	T	N
						1570157	T	C	C												909299	C	A	N
						1570231	G	T	C												909410	A	G	N
						1570443	G	A	C												909449	A	G	N
						1570453	A	G	C												910117	C	T	N
						1570610	T	C	C												910189	A	C	N
						1570619	G	A	N												911505	C	T	N
						1570623	G	A	N												911718	T	C	C
						1570663	T	C	N												911747	C	G	C
						1570674	A	G	N												911930	T	A	N
						1570689	C	T	N												912198	A	T	N
						1570733	G	A	N												912250	C	T	N
						1570766	G	A	N												912401	T	C	N
						1570915	A	G	N												912427	T	C	N
						1571169	G	A	N												912520	T	G	N
						1572495	T	C	C												912522	G	T	N
						1572545	C	T	C												912552	T	A	N
						1572685	A	C	C												912714	A	G	C
						1572950	C	T	C												912715	A	G	C
						1573212	G	A	C												912716	A	T	C
						1573446	G	A	C												912764	G	T	C
						1573500	A	G	C												912809	G	C	C
						1573584	A	G	C												914240	T	A	N
						1574173	A	G	N												914261	A	G	N
						1575664	G	T	N												914464	G	A	C
						1575698	C	T	N												914539	A	T	C
						1575965	G	A	N												914557	T	A	C
						1576052	A	G	N												914713	G	T	C
						1576079	C	T	N												923294	A	G	N
						1578464	A	G	N												923313	C	T	N
						1578533	C	T	N												923444	G	A	C
						1578597	G	A	N												923864	G	C	C
						1578709	C	A	N												923873	G	A	C
						1579152	C	T	N												924127	A	G	C
						1579383	C	A	N												924227	A	G	C
						1579522	G	A	N												924580	C	T	C
						1579578	T	C	N												924816	C	T	C
						1581342	A	G	C												924851	G	A	C
						1583047	T	G	N												925602	C	T	C
						1583124	C	T	N												925864	T	C	N
						1583141	G	A	N												925949	C	T	N
						1583170	T	C	N												926055	C	T	N
						1583190	C	T	N												926085	C	T	N
						1583270	C	T	N												926098	C	T	N
						1583649	G	A	N												926261	C	G	N
						1583824	A	G	N												926333	T	C	N
						1585601	A	C	N												926366	T	C	N
						1585897	A	G	N												926439	T	C	N
						1586763	A	C	N												926453	A	T	N
						1586929	A	G	N												926567	C	A	N
						1587001	C	T	N												927038	T	C	C
						1587019	A	G	N												927045	A	G	N
						1587803	G	C	N												927118	C	T	N
						1588672	C	T	N												927138	T	C	N
						1588845	A	T	N												927367	T	C	N
						1589090	G	C	C												927392	A	G	N
						1589263	T	C	C												927572	C	T	N
						1589272	G	A	C												929745	T	G	N
						1589299	G	A	C												930130	G	A	N
						1589431	A	T	C												930267	C	T	N
						1589446	A	C	C												930289	T	C	N
						1589544	C	G	N												930293	A	T	N
						1589572	T	G	N												930302	C	T	N
						1589740	G	A	N												932379	G	A	C
						1590160	G	T	N												932752	T	C	C
						1590563	G	A	C												932775	A	G	C
						1590599	C	T	C												933162	G	A	C
						1590799	G	A	C												933324	A	G	C
						1590865	G	A	C												933408	G	A	C
						1591603	G	A	C												933416	T	A	C
						1591834	T	G	C												933417	T	A	C
						1591898	A	G	N												933419	T	A	C
						1591907	T	C	N												933420	T	G	C
						1592349	C	A	N												933449	G	A	C
						1592621	G	A	C												936325	G	A	C
						1592665	C	A	C												937139	G	C	N
						1592836	G	T	C												937795	C	A	C
						1593284	T	A	C												937939	C	A	N
						1595710	C	T	C												938749	G	A	N
						1595836	G	A	C												938753	C	A	N
						1597277	T	C	C												938928	T	A	N
						1597555	C	T	N												939024	T	A	N
						1597684	G	A	N												939080	A	G	N
						1597855	G	A	N												939121	T	A	N
						1597857	C	A	N												939184	A	C	N
						1597964	A	G	N												939643	A	G	N
						1597967	A	G	N												939644	A	T	N
						1598005	A	C	N												939663	G	A	N
						1598430	A	G	N												939674	A	G	N
						1598681	T	C	N												939757	G	T	N
						1598686	T	A	N												942015	T	C	N
						1599745	A	G	C												942017	T	G	N
						1600086	T	C	C												942073	C	A	N
						1604832	G	A	C												942910	T	A	N
						1606034	C	A	C												965200	C	T	C
						1606073	C	T	C												965599	C	T	N
						1608160	G	A	C												992910	G	A	C
						1608188	A	G	C												1046650	G	A	C
						1608953	T	A	N												1092086	G	A	N
						1608994	A	T	N												1135577	T	G	N
						1609116	G	A	N												1169259	G	A	N
						1609495	G	T	N
						1610874	A	T	N
						1611148	C	T	N
						1611154	G	A	N
						1611170	C	A	N
						1611303	C	T	C
						1611474	C	T	C
						1613637	C	T	C
						1613815	C	T	C
						1614647	A	G	N
						1614728	T	C	N
						1615910	C	T	C
						1618070	A	T	C
						1622192	A	G	C
						1622251	G	A	C
						1622360	A	G	C
						1623600	A	G	C
						1623704	G	A	C
						1624876	G	A	N
						1626386	C	T	C
						1627145	G	T	N
						1627308	T	G	N
						1627470	T	C	N
						1627478	A	G	N
						1643042	A	T	N
						1644536	T	C	C
						1644596	C	T	C
						1644653	A	G	C
						1644872	C	T	C
						1645060	C	A	N
						1645072	G	A	N
						1645240	T	G	N
						1648447	C	T	C
						1648567	T	C	C
						1649011	T	A	N
						1650035	A	T	C
						1650323	C	T	C
						1650368	G	T	C
						1650458	A	T	C
						1650970	A	G	N
						1650993	G	T	N
						1653333	C	A	C
						1656363	T	A	N
						1656372	T	C	N
						1656377	A	G	N
						1656692	C	A	N
						1656712	C	T	N
						1657044	A	G	N
						1657667	C	T	C
						1657690	C	T	C
						1657894	C	T	C
						1658164	T	A	N
						1658246	G	A	N
						1658793	T	C	N
						1658980	G	A	N
						1659065	T	A	N
						1660769	A	G	C
						1661034	A	G	C
						1661037	A	G	C
						1661284	G	A	C
						1661285	G	A	C
						1661305	T	A	C
						1661575	T	A	C
						1661608	G	A	C
						1661715	C	T	N
						1661751	C	T	N
						1661775	A	G	N
						1661782	G	A	N
						1661783	A	G	N
						1661785	A	G	N
						1661927	A	G	C
						1662232	G	T	C
						1662444	A	G	C
[truncated: 1,034 more rows]

## Sheet: Table S3
Table S3. MRS elements in the C. dubliniensis genome.
Chr	Feature Name	Location	Size	# RPS Units	Orientation
1	Cd36.chrom1.MRS	1713491..1729132	15,642 bp	Rearranged 1	Sense
2	Cd36.chrom2.MRS_1	2112005..2127236	15,232 bp	one complete; one partial	Sense
	Cd36.chrom2.MRS_2	2180371..2201636	21,266 bp	four complete; one partial	Sense
3	Cd36.chrom3.MRS	448461..460388	11,928 bp	one partial	Anti-sense
4	Cd36.chrom4.MRS_1	853130..875272	22,143 bp	six partial	Anti-sense
	Cd36.chrom4.MRS_2	1231461..1243830	12,370 bp	one partial	Sense
5	Cd36.chrom5.MRS	759101..782819	23,719 bp	five complete; one partial	Sense
6	Cd36.chrom6.MRS	870401..883232	12,832 bp	one partial	Anti-sense
7	Cd36.chrom7.MRS_1	143881..166627	22,747 bp	four complete; one partial	Anti-sense
	Cd36.chrom7.MRS_2	577277..628436	51,160 bp	eighteen complete; one partial	Sense
R	-	-	-	-	-
Notes:	1. Some rearrangement appears to have occurred within this MRS, making precise definition of individual RPS units impossible.
	2. There is no MRS in chromosome R.

## Sheet: Table S4
Table S4. Species-specific genes from C. albicans and C. dubliniensis (excluding pseudogenes).
C. albicans
	ID	Alias	Chr	Size^	Status*	Description	C. dubliniensis top BLAST hit	Cluster#
1	orf19.6957		3	102	U	40S ribosomal protein	-	-
2	orf19.3208	DAL5	5	546	U	Allantoate permease	Cd36_83640	48
3	orf19.2907	PGA42	4	227	U	Allantoate permease	Cd36_45820	48
4	orf19.309	DAL5	3	525	U	Allantoate permease, putative	Cd36_83640	48
5	orf19.1824	PGA50	1	309	U	Allantoin permease	Cd36_45820	73
6	orf19.313	DAL4	3	570	U	Allantoin permease	-	73
7	orf19.360	FUR4	3	570	U	Allantoin permease	-	73
8	orf19.1780		2	412	U	Alpha-1,6-mannanase, putative	Cd36_24210	5175
9	orf19.1816	ALS3	R	1155	V	ALS family protein	Cd36_64210	5
10	orf19.5736	ALS5	6	1347	V	ALS family protein	Cd36_86290	5
11	orf19.2552		R	654	U	Cation transporting ATPase, putative	Cd36_70530	-
12	orf19.2553		R	355	U	Cation transporting ATPase, putative	-	-
13	orf19.4984		1	518	U	Chitinase, putative	Cd36_16810	-
14	orf19.6897		7	146	U	DNA replication factor	-	-
15	orf19.3924		5	379	U	Esterase/lipase, putative	Cd36_22350	3721
16	orf19.4439		1	147	D	hp	-	3114
17	orf19.2779		1	170	D	hp	Cd36_83910	4041
18	orf19.1105.3		5	85	U	hp	-	-
19	orf19.994		1	182	U	hp	Cd36_23870	-
20	orf19.4055		5	103	V	hp	Cd36_24500	4039
21	orf19.6113		1	103	D	hp	Cd36_24500	4039
22	orf19.1143		1	394	U	hp	Cd36_25320	3683
23	orf19.4702		4	300	U	hp	Cd36_41370	-
24	orf19.3376		4	174	U	hp	Cd36_43270	-
25	orf19.7539.1		R	389	D	hp	Cd36_60170	-
26	orf19.4069		2	154	U	hp	Cd36_63050	-
27	orf19.7266		1	104	U	hp	Cd36_73520	-
28	orf19.5966		3	113	D	hp	Cd36_85440	-
29	orf19.1008		R	104	D	hp	-	-
30	orf19.1009		R	106	D	hp	-	-
31	orf19.1257		4	110	D	hp	-	-
32	orf19.1286		5	118	D	hp	-	-
33	orf19.133		6	107	D	hp	-	-
34	orf19.134		6	136	D	hp	-	-
35	orf19.1367.1		2	80	U	hp	-	-
36	orf19.149		2	145	D	hp	-	-
37	orf19.1506		2	141	D	hp	-	-
38	orf19.1508		2	111	D	hp	-	-
39	orf19.1581		2	110	D	hp	-	-
40	orf19.1599		2	118	D	hp	-	-
41	orf19.1678		3	116	D	hp	-	-
42	orf19.1736		R	100	D	hp	-	-
43	orf19.1737		R	118	D	hp	-	-
44	orf19.1821		1	103	D	hp	-	-
45	orf19.1831		1	140	D	hp	-	-
46	orf19.1935		5	148	D	hp	-	-
47	orf19.1958		5	169	D	hp	-	-
48	orf19.2025		2	114	D	hp	-	-
49	orf19.2061		2	106	D	hp	-	-
50	orf19.2203		2	105	D	hp	-	-
51	orf19.2505		3	102	D	hp	-	-
52	orf19.2537		R	113	D	hp	-	-
53	orf19.2539		R	111	D	hp	-	-
54	orf19.257		3	108	D	hp	-	-
55	orf19.2625		R	101	D	hp	-	-
56	orf19.2645		5	106	D	hp	-	-
57	orf19.2725		4	100	D	hp	-	-
58	orf19.2766		4	102	D	hp	-	-
59	orf19.2813		3	42	D	hp	-	-
60	orf19.2905		4	222	D	hp	-	-
61	orf19.2943.5		1	99	D	hp	-	-
62	orf19.3073		4	119	U	hp	-	-
63	orf19.3140		4	109	D	hp	-	-
64	orf19.3159.4		5	97	D	hp	-	-
65	orf19.3209	FGR42	5	104	V	hp	-	-
66	orf19.3229		R	101	D	hp	-	-
67	orf19.3238		R	133	D	hp	-	-
68	orf19.3336		1	152	D	hp	-	-
69	orf19.3427		6	116	D	hp	-	-
70	orf19.3522		2	101	D	hp	-	4040
71	orf19.3543		2	114	D	hp	-	-
72	orf19.3637		2	105	D	hp	-	-
73	orf19.3721		R	110	U	hp	-	-
74	orf19.3748		R	106	D	hp	-	-
75	orf19.3868		R	117	D	hp	-	-
76	orf19.3888.2		R	95	D	hp	-	-
77	orf19.3907		5	103	D	hp	-	-
78	orf19.3919.1		5	89	U	hp	-	-
79	orf19.3968		5	103	D	hp	-	-
80	orf19.4200		6	119	D	hp	-	-
81	orf19.4214		6	133	D	hp	-	-
82	orf19.4241		5	104	D	hp	-	4037
83	orf19.4310		5	160	D	hp	-	-
84	orf19.4320		5	126	D	hp	-	-
85	orf19.4321		5	150	D	hp	-	-
86	orf19.4439.1		1	69	U	hp	-	3114
87	orf19.4461		1	120	U	hp	-	-
88	orf19.4472		1	105	D	hp	-	-
89	orf19.4646		4	145	D	hp	-	-
90	orf19.4672		4	100	D	hp	-	-
91	orf19.4685		4	105	D	hp	-	-
92	orf19.4976		1	118	D	hp	-	-
93	orf19.5190		7	141	D	hp	-	-
94	orf19.5289		R	104	D	hp	-	-
95	orf19.533		R	104	D	hp	-	-
96	orf19.5503		7	109	D	hp	-	-
97	orf19.5556		6	102	D	hp	-	-
98	orf19.5918		3	101	D	hp	-	-
99	orf19.598		R	125	D	hp	-	-
100	orf19.599		R	119	D	hp	-	-
101	orf19.6030		1	219	D	hp	-	-
102	orf19.6079		1	299	U	hp	-	-
103	orf19.6110		1	115	D	hp	-	-
104	orf19.6114		1	103	D	hp	-	-
105	orf19.6115		1	112	D	hp	-	-
106	orf19.6192		3	133	D	hp	-	-
107	orf19.6338		6	128	D	hp	-	-
108	orf19.6339	NRG2	6	114	V	hp	-	-
109	orf19.647.3		R	99	D	hp	-	-
110	orf19.6491		7	117	D	hp	-	-
111	orf19.6575		7	108	D	hp	-	-
112	orf19.6606		R	454	U	hp	-	-
113	orf19.6911		7	109	D	hp	-	-
114	orf19.6922		3	29	D	hp	-	-
115	orf19.7024		7	102	D	hp	-	-
116	orf19.7054		7	121	D	hp	-	-
117	orf19.7055		7	108	D	hp	-	-
118	orf19.7271		1	106	D	hp	-	-
119	orf19.7279.1		R	87	U	hp	-	-
120	orf19.7340		R	110	D	hp	-	-
121	orf19.7395		3	105	D	hp	-	-
122	orf19.7561	DEF1	R	887	V	hp	-	-
123	orf19.77.1		6	83	U	hp	-	-
124	orf19.787		4	101	U	hp	-	-
125	orf19.937		5	157	D	hp	-	-
126	orf19.5854.1		3	159	U	hp	Cd36_07740	-
127	orf19.1266		4	121	D	hp	Cd36_11410	-
128	orf19.6078.1		1	65	U	hp	Cd36_15890	-
129	orf19.6978		3	109	U	hp	Cd36_17000	-
130	orf19.857	FMO2	2	552	U	hp	Cd36_18330	479
131	orf19.1596	FGR28	4	598	V	IFA family member	Cd36_63200	11
132	orf19.4509		2	106	U	IFA family member	Cd36_73110	11
133	orf19.4510	IFA4	2	677	U	IFA family member	Cd36_73110	11
134	orf19.4511		2	687	U	IFA family member	Cd36_73110	11
135	orf19.5141		7	723	U	IFA family member	Cd36_73110	11
136	orf19.5177		7	644	U	IFA family member	Cd36_73110	11
137	orf19.6353		1	692	U	IFA family member	Cd36_73110	11
138	orf19.1002		1	630	U	IFA family member	Cd36_73260	11
139	orf19.1005		1	602	U	IFA family member	Cd36_73260	11
140	orf19.1330		7	606	U	IFA family member	Cd36_73260	11
141	orf19.996		1	617	U	IFA family member	Cd36_73260	11
142	orf19.1326		4	656	U	IFA family member	Cd36_73360	11
143	orf19.2663		1	584	U	IFA family member	Cd36_73360	11
144	orf19.4975	HYR1	1	919	U	IFF family member	Cd36_51670	5204
145	orf19.915		R	704	U	Leucine Rich Repeat protein	-	-
146	orf19.1855		R	604	U	Major facilitator superfamily transporter	Cd36_32190	1880
147	orf19.2163		6	837	U	Metallopeptidase	Cd36_24500	433
148	orf19.727		R	512	U	MRS-encoded ORF	Cd36_64490	24
149	orf19.1774		2	380	U	NAD-formate dehydrogenase, putative	-	157
150	orf19.2584	OPT9	R	246	V	Oligopeptide transporter, pseudogene	Cd36_22510	14
151	orf19.4767		1	246	U	Potential fungal zinc cluster transcription factor	Cd36_80680	3480
152	orf19.4505	ADH3	2	282	U	Secondary alcohol dehydrogenase, putative	Cd36_19080	-
153	orf19.3074	TLO10	4	219	U	TLO family member	Cd36_35580	8
154	orf19.7276.1	TLO4	1	66	U	TLO family member	Cd36_35580	8
155	orf19.7544	TLO1	R	250	U	TLO family member	Cd36_35580	8
156	orf19.1925	TLO5	2	176	U	TLO family member	Cd36_72860	8
157	orf19.2661	TLO34	1	331	U	TLO family member	Cd36_72860	8
158	orf19.362	TLO9	4	225	U	TLO family member	Cd36_72860	8
159	orf19.4054	CTA24	5	252	U	TLO family member	Cd36_72860	8
160	orf19.5467	TLO7	3	169	U	TLO family member	Cd36_72860	8
161	orf19.5700	TLO11	5	169	U	TLO family member	Cd36_72860	8
162	orf19.6112	CTA2	1	255	V	TLO family member	Cd36_72860	8
163	orf19.6191	TLO8	3	169	U	TLO family member	Cd36_72860	8
164	orf19.6337	TLO13	6	176	U	TLO family member	Cd36_72860	8
165	orf19.7127	TLO16	7	175	U	TLO family member	Cd36_72860	8
166	orf19.3903		5	195	U	transmembrane protein, putative	Cd36_53920	4642
167	orf19.3906		5	196	U	transmembrane protein, putative	Cd36_53920	4642
168	orf19.4691		4	201	U	transmembrane protein, putative	Cd36_53920	4642
169	orf19.7545		R	668	U	Mutator transposon	Cd36_41370	4885
170	orf19.1825		1	741	U	Mutator transposon	Cd36_65640	4885
171	orf19.2657		5	708	U	Mutator transposon	Cd36_65640	4885
172	orf19.4068		2	762	U	Mutator transposon	-	4885
173	orf19.7278		1	226	U	retrotransposon Tca2 polyprotein	-	-
174	orf19.2669		4	1447	U	retrotransposon Tca4 polyprotein	-	-
175	orf19.7272		1	110	D		Cd36_17350	-
176	orf19.2219	ORF298	2	1208	U	non-LTR retrotransposon	Cd36_22670	9
177	orf19.6807		3	609	U	non-LTR retrotransposon	Cd36_22670	9
178	orf19.3461		6	120	U	non-LTR retrotransposon	Cd36_22670	-
179	orf19.1677		3	265	D	non-LTR retrotransposon	Cd36_22670	-
180	orf19.7274		1	325	U		Cd36_25050	-
181	orf19.7275	FGR24	1	238	V		Cd36_25050	-
182	orf19.6078	POL93	1	653	U	non-LTR retrotransposon	Cd36_25420	-
183	orf19.2866		4	516	U	Cirt family transposase	Cd36_26210	58
184	orf19.7301		R	586	U	Cirt family transposase	Cd36_26210	58
185	orf19.4919		1	436	D	Cirt family transposase	-	58
186	orf19.559	FGR14	R	1149	U	non-LTR retrotransposon	Cd36_29120	1504
187	orf19.7487		R	418	U	non-LTR retrotransposon	Cd36_29120	1504
188	orf19.35.1		2	80	U		Cd36_32110	-
189	orf19.4918		1	519	U	Transposase	Cd36_34780	-
190	orf19.562	FGR13	R	608	U	non-LTR retrotransposon	Cd36_81170	4044
191	orf19.1610		3	377	U	non-LTR retrotransposon	Cd36_81170	4044
C. dubliniensis
	ID		Chr	Size		Description	C. albicans top BLAST hit	Cluster#
1	Cd36_12190		1	281		aldo/keto reductase, pseudogene, putative	orf19.2244	-
2	Cd36_10960		1	261		diacylglycerol pyrophosphate phosphatase, putative	orf19.656	3869
3	Cd36_81860		3	586		dipeptidyl-peptidase, putative,dipeptidyl aminopeptidase	orf19.5773	1093
4	Cd36_70920		7	101		DNA-binding protein	orf19.4965	3294
5	Cd36_72840		7	110		DNA-binding protein TRF1 homologue	-	3294
6	Cd36_10760		1	568		glutamate decarboxylase, putative	orf19.1153	2649
7	Cd36_24200		2	516		hp	orf19.3490	24
8	Cd36_87810		3	101		hp	-	3687
9	Cd36_41370		4	843		hp	orf19.4703	4885
10	Cd36_62770		6	208		hp	orf19.5057	4885
11	Cd36_03610		1	659		hp	-	5698
12	Cd36_19400		2	285		hp	-	5698
13	Cd36_73100		7	794		hp	-	-
14	Cd36_23550		2	321		hp	-	-
15	Cd36_02260		1	117		hp	-	-
16	Cd36_12680		1	119		hp	-	-
17	Cd36_31380		R	127		hp	-	-
18	Cd36_34350		R	310		hp	-	-
19	Cd36_44300		4	223		hp	-	-
20	Cd36_42390		4	126		hp	-	-
21	Cd36_34790		R	480		hp	-	-
22	Cd36_11900		1	177		hp	orf19.6350	-
23	Cd36_65070		6	158		hp	orf19.2878	-
24	Cd36_18590		2	287		hp	orf19.4068	-
25	Cd36_16280		2	150		hypothetical membrane protein	-	-
26	Cd36_23090		2	210		hypothetical membrane protein	-	-
27	Cd36_63200		6	630		LPF family protein, putative	orf19.6690	11
28	Cd36_00010		1	1267		subtelomeric Y'-related helicase, pseudogene, putative	orf19.5469	1
29	Cd36_55100		5	623		subtelomeric Y'-related helicase, pseudogene, putative	orf19.5469	1
30	Cd36_45320		4	512		exonuclease of L1-like non-LTR retrotransposon zorro 3	orf19.559	1504
31	Cd36_80030		3	541		gag protein of transposable element, pseudogene, putative	-	3972
32	Cd36_35590		R	330		gag protein, putative	-	3972
33	Cd36_04320		1	385		gag protein, putative	-	3972
34	Cd36_27590		R	158		hp	orf19.7301	58
35	Cd36_55090		5	220		hp	-	3369
36	Cd36_80050		3	165		hp	-	3369
37	Cd36_87800		3	250		hp	-	3369
38	Cd36_46700		4	413		hp	orf19.5246	3791
39	Cd36_17360		2	572		hp	orf19.5246	3791
40	Cd36_50060		5	558		hp	orf19.5246	3791
41	Cd36_09930		1	405		hp	-	3972
42	Cd36_25410		R	272		hp	-	5220
43	Cd36_80070		3	147		hp	-	5437
44	Cd36_13400		1	164		hp	-	5437
45	Cd36_51130		5	267		hp	orf19.4070	5668
46	Cd36_07170		1	105		hp	orf19.562	-
47	Cd36_07190		1	103		hp	orf19.562	-
48	Cd36_25390		R	132		non-ltr retrotransposon zorro 3 orf1-related protein, putative	orf19.562	-
49	Cd36_44090		4	149		non-LTR retrotransposon Zorro 3 orf1-related protein, putative	orf19.562	-
50	Cd36_18870		2	148		non-ltr retrotransposon zorro 3 orf1-related protein, putative	orf19.562	-
51	Cd36_25400		R	79		non-ltr retrotransposon zorro 3 orf1-related protein, putative	orf19.562	-
52	Cd36_29130		R	351		non-ltr retrotransposon zorro 3 orf1-related protein, putative	orf19.562	-
53	Cd36_74020		7	258		non-LTR retrotransposon Zorro-like polyprotein fragment, putative	-	-
54	Cd36_72500		7	449		non-LTR, zorro-like retrotransposon family polyprotein fragment, putative	-	-
55	Cd36_22800		2	161		pol protein (fragment)	orf19.2219	-
56	Cd36_03740		1	202		Pol protein, pseudogene, putative	-	-
57	Cd36_22810		2	157		polyprotein	orf19.6078	-
58	Cd36_04800		1	432		polyprotein (fragment)	orf19.2669	-
59	Cd36_04820		1	244		polyprotein (fragment), putative	-	-
60	Cd36_25430		R	179		polyprotein (fragment), putative	-	-
61	Cd36_08620		1	395		polyprotein (fragment), putative	orf19.2219	-
62	Cd36_04810		1	419		polyprotein (fragment), putative	orf19.2669	-
63	Cd36_07200		1	119		polyprotein (fragment), putative	orf19.559	-
64	Cd36_07210		1	113		polyprotein (fragment), putative	orf19.7487	-
65	Cd36_17350		2	1185		polyprotein of L1-like non-LTR retrotransposon	orf19.559	-
66	Cd36_15030		2	1090		polyprotein of l1-like non-ltr retrotransposon zorro 1 (frameshifted), probable	orf19.7274	-
67	Cd36_25050		R	684		polyprotein of L1-like non-LTR retrotransposon Zorro 1, putative	orf19.559	-
68	Cd36_32770		R	107		polyprotein of L1-like non-LTR retrotransposon Zorro 3	-	-
69	Cd36_81140		3	683		polyprotein of L1-like non-LTR retrotransposon zorro 3	orf19.559	-
70	Cd36_81130		3	131		polyprotein of L1-like non-LTR retrotransposon zorro 3	orf19.559	-
71	Cd36_81160		3	273		polyprotein of L1-like non-LTR retrotransposon zorro 3	orf19.559	-
72	Cd36_44100		4	533		polyprotein of L1-like non-LTR retrotransposon zorro 3, pseudogene, putative	orf19.559	-
73	Cd36_18860		2	386		polyprotein of l1-like non-ltr retrotransposon zorro 3, putative	orf19.559	-
74	Cd36_25380		R	147		polyprotein of l1-like non-ltr retrotransposon zorro 3, putative	orf19.559	-
75	Cd36_03730		1	96		polyprotein, pseudogene, putative	-	-
76	Cd36_32100		R	965		polyprotein, putative,integrase, putative	-	-
77	Cd36_32110		R	495		polyprotein, putative,reverse transcriptase, putative	orf19.2669	-
78	Cd36_81150		3	126		possible non-LTR retrotransposon Zorro family polyprotein	orf19.7487	-
79	Cd36_25040		R	334		possible retrotransposon-related protein	-	-
80	Cd36_87790		3	343		possible retrotransposon-related protein	-	-
81	Cd36_22790		2	144		putative polyprotein	-	-
82	Cd36_81820		3	370		putative retrotransposon protein	orf19.4070	-
83	Cd36_64020		6	144		retrotransposon polyprotein, pseudogene, putative	-	-
84	Cd36_22480		2	182		retrotransposon polyprotein, putative	orf19.2669	-
85	Cd36_51120		5	1523		retrotransposon polyprotein, putative	orf19.2669	-
86	Cd36_71790		7	1350		retrotransposon polyprotein, putative	orf19.6469	-
87	Cd36_71820		7	1124		retrotransposon polyprotein, putative	orf19.6469	-
88	Cd36_83900		3	858		retrotransposon polyprotein, putative	orf19.6469	-
89	Cd36_13410		1	205		retrotransposon protein (fragment), putative	orf19.1490.1	-
90	Cd36_13420		1	179		retrotransposon protein (fragment), putative	orf19.1490.1	-
91	Cd36_83910		3	678		retrotransposon protein, putative	orf19.6465	-
92	Cd36_64030		6	230		retrotransposon reverse transcriptase, pseudogene, putative	orf19.6078	-
93	Cd36_52710		5	1410		retrotransposon Tca2 polyprotein, putative	orf19.2669	-
94	Cd36_81840		3	409		retrotransposon tca2 polyprotein, putative	orf19.2669	-
95	Cd36_80040		3	215		retrotransposon tca3 polyprotein, putative	orf19.6807	-
96	Cd36_83320		3	395		retrotransposon tca3-like polyprotein, putative	orf19.2219	-
97	Cd36_50040		5	313		retrotransposon Tca4 gag-like protein, putative	orf19.2668	-
98	Cd36_81830		3	1123		retrotransposon tca4 polyprotein, putative	orf19.2669	-
99	Cd36_86450		3	221		retrotransposon tca4 polyprotein, putative	orf19.2669	-
100	Cd36_72460		7	664		retrotransposon Tca4-like polyprotein fragment, pseudogene, putative	orf19.2669	-
101	Cd36_52830		5	305		retrotransposon-like polyprotein, pseudogene	orf19.1677	-
102	Cd36_80060		3	198		retrotransposon-related protein, putative	-	-
103	Cd36_81310		3	395		similar to retrotransposon tca3 polyprotein	orf19.2219	-
104	Cd36_72450		7	817		Tca4-like retrotransposon reverse transcriptase, putative	orf19.2669	-
105	Cd36_73410		7	314		Tca-like retrotransposon GAG protein, putative	orf19.2219	-
106	Cd36_60050		6	215		Tcd3 polyprotein, pseudogene, putative	orf19.6807	-
107	Cd36_60040		6	529		Tcd3 retrotransposon gag protein, putative	-	-
108	Cd36_00730		1	923		transposable element polyprotein, putative	orf19.6078	-
109	Cd36_22820		2	318		transposable element protein	-	5220
110	Cd36_81120		3	448		uncharacterized protein, pseudogene, putative	orf19.562	-
111	Cd36_64050		6	576		unidentified pseudogene, putative	-	-
Note:	For each species, canonical genes (ID shaded yellow) are listed first, followed by species-specific transposable element genes.
	^ Gene size is given in amino acid residues.
	* For C. albicans genes, the status of the gene model is abbreviated: V – verified, U – uncharacterized, D – dubious.
	# Where possible, a species-specific gene is linked to the cluster within which is was placed by the OrthoMCL analysis (see Methods).

## Sheet: Table S5
Table S5. Transposable elements in C. dubliniensis genome.
Coordinates, (strand)	Class	Transposable Element
Chromosome 1
12547-13148, (+)	LINE	Zorro4, partial ORF1 (subtelomeric)
13149-13702, (+)	LTR*	huia, partial Tcd16 (subtelomeric)
13703-15131, (+)	LTR*	zeta, Tcd7, RT/RH ORF region, PPT + right LTR (subtelomeric)
15163-20699, (+)	LTR	solo vau, truncated (subtelomeric)
15365-20691, (+)	LTR*	san, Tcd4 (subtelomeric)
21573-21965, (+)	LINE	Zorro1-like, partial ORF2 (subtelomeric)
158304-163553, (-)	LTR*	huia, Tcd16
359549-359851, (+)	LTR	solo kahu, truncated
368532-368781, (-)	LTR	solo kahu, partial
369494-369797, (-)	LTR	solo beta, truncated
378605-378814, (-)	LTR	solo gamma, truncated
503795-503921, (+)	LTR	solo huia
570958-575791, (-)	LTR*	kappa, Tcd6
590071-590373, (+)	LTR	solo vau
842118-844506, (-)	LTR*	koppa, Tcd19
846522-846990, (+)	LTR	solo episemon
866855-870254, (-)	LTR*	korimako, Tcd33. LTR followed by PBS, Gag and PR/IN part of Pol.
867211-867639, (+)	LTR	solo lambda
972837-974311, (+)	LTR*	tara, Tcd30, LTR and putative Gag ORF
974312-974614, (-)	LTR	solo vau
1095089-1101346, (-)	LTR*	kotuku, Tcd32
1339104-1339637, (-)	LINE	Zorro1-like, partial ORF2
1600351-1600780, (+)	LTR	solo epsilon
1600946-1601095, (+)	LINE	Zorro1-like, partial ORF1
1601153-1601484, (+)	LTR	solo san
1602234-1602522, (-)	LTR	solo beta
1667810-1667973, (-)	LTR	solo ruru
1680488-1680686, (+)	LTR	solo chi
1701524-1705491, (+/-)	LINE	Zorro3, partial coding sequences
1762535-1762741, (-)	LTR	solo eta, truncated
1780048-1780563, (-)	LTR	solo lambda
1927609-1927911, (-)	LTR	solo vau
2030618-2030831, (-)	LTR	solo koppa
2041976-2043730, (-)	LTR*	iota, Tcd23
2139253-2139544, (-)	LTR	solo toroa
2204704-2204817, (+)	LTR	solo kotuku, truncated
2340296-2340338, (+)	LTR	solo chi, truncated
2381347-2382151, (-)	LTR	solo zeta
2381600-2381898, (+)	LTR	solo upsilon
2382152-2384001, (-)	LTR*	whio, Tcd12, truncated LTR and putative Gag ORF
2383512-2383887, (-)	LTR	solo titi
2384003-2384455, (+)	LTR	solo psi
2385121-2385382, (-)	LTR	solo pi
2641310-2641945, (+/-)	LINE	Zorro3, partial coding sequences
2642176-2642478, (+)	LTR	solo vau
2697515-2697691, (-)	LTR	solo phi
2697859-2698998, (-)	pTEDO	ORF related to 5' half of Zorro4 ORF1, conserved in C. albicans.
2805054-2805325, (-)	LTR	solo kotuku
2830059-2830336, (-)	LTR	solo sampi, partial
2836811-2837094, (-)	LTR	solo kotuku
2842251-2842539, (+)	LTR	solo eta, truncated
2883896-2884143, (+)	LTR	solo iota
2997890-2998585, (-)	LTR	solo mu
3207082-3207460, (+)	LINE	Zorro1-like, partial ORF1 (subtelomeric)
3207461-3208882, (-)	LTR*	partial Tcd16 (subtelomeric)
Chromosome 2
4592-7829, (+)	LINE	Zorro1-like, 5' truncated ORF1 + 3' truncated ORF2 (subtelomeric)
7841-7938, (-)	LINE	Zorro1-like, partial ORF1 (subtelomeric)
170482-170658, (+)	LTR	solo phi
261250-261636, (+)	LTR	solo xi
317311-317624, (+)	LTR	solo nu
321326-321463, (-)	LTR	solo rho, truncated
426346-426536, (-)	LTR	solo phi
466281-466751, (+)	LTR	solo eta
523001-528815, (-)	LINE	Zorro4
768455-768730, (-)	LTR	solo rho
799152-801503, (+)	LTR*	omicron, Tcd20, Gag ORF flanked by inverted LTRs
868214-868469, (-)	LTR	solo iota
896920-900079, (+/-)	LINE	Zorro3, coding sequences highly disrupted
896974-897444, (+)	LTR	solo eta
900380-900769, (+)	LTR	solo alpha
902245-903164, (-)	LTR	solo kereru
902611-902897, (-)	LTR	solo toroa
965633-966118, (-)	LTR	solo epsilon
969934-970225, (-)	LTR	solo toroa
971114-971290, (+)	LTR	solo phi
1004671-1004748, (+)	LINE	Zorro4-like, partial ORF2
1028401-1028652, (-)	uRTNf	fragment of copia-like Pol ORF
1079278-1079525, (-)	LTR	solo nu, partial
1114793-1115094, (-)	LTR	solo upsilon
1117799-1117887, (+)	LTR	solo beta, partial
1118474-1118561, (-)	LTR	solo beta, partial
1349852-1352022, (-)	DNA (Mut)	Mutator transposon
1355877-1356043, (+)	LTR	solo phi
1683183-1683449, (+)	LTR	solo sampi, truncated
1683538-1683820, (-)	LINE	Zorro1-like, partial ORF2
1683955-1685965, (-)	LTR*	mu, Tcd28, end of Pol ORF followed by LTR
1685187-1685448, (+)	LTR	solo pi
1734610-1740869, (-)	LTR*	nu, Tcd3
1773186-1778264, (-)	LTR*	sampi, Tcd24
1939774-1939872, (+)	LTR	solo epsilon, truncated
1942372-1942887, (+)	LTR	solo episemon
2046082-2048274, (+)	DNA (Mut)	Mutator transposon
2097522-2097801, (-)	LTR	solo kappa
2111395-2111857, (-)	LTR	solo zeta
2123669-2123960, (+)	LTR	solo toroa
2279064-2279456, (-)	LINE	Zorro1-like, partial ORF2 (subtelomeric)
2280314-2280514, (-)	LTR	solo vau, truncated (subtelomeric)
Chromosome 3
10697-10943, (+)	LTR	solo iota (subtelomeric)
11446-14040, (+)	LTR*	Tcd21-like partial ORFs + duplicated fragment, (subtelomeric)
14059-14944, (-)	LINE	Zorro1-like, partial ORF1 (subtelomeric)
199007-199125, (-)	LTR	solo kahu, truncated
262141-269851, (-)	LINE	Zorro3, small deletion where another LINE is inserted.
262283-264351, (+)	LINE	Zorro3, 5' truncated ORF1 + 3' truncated ORF2
306943-308697, (+)	LTR*	iota, Tcd23
411791-411979, (-)	LTR	solo phi
437108-443461, (+)	LTR*	kotuku, Tcd32
463104-468101, (-)	LTR*	nu, partial Tcd3
471086-471588, (-)	LTR	solo lambda
554386-554431, (+)	LINE	Zorro3-like, 3' end
565296-565680, (+)	LTR	solo titi
567853-568124, (-)	LTR*	phi, Tcd26, most of internal region and part of one LTR missing.
618792-619133, (-)	LTR	solo toroa
620614-623205, (-)	LTR*	ruru, Tcd31, LTR, PBS + ORF fragments
683382-683758, (+)	LTR	solo san
750951-752705, (+)	LTR*	iota, Tcd23
808384-808586, (-)	LTR	solo kappa
813476-813891, (-)	LTR	solo epsilon
863086-869685, (-)	LTR*	epsilon, Tcd25
863635-864150, (-)	LTR	solo episemon
870858-871100, (-)	LTR	solo iota, partial
875627-876088, (+)	LTR	solo epsilon
908427-908553, (-)	LTR	solo koppa, truncated
1367402-1367649, (+)	LTR	solo iota
1471641-1472038, (-)	LTR	solo zeta, truncated
1502665-1502790, (-)	LTR	solo korimako, truncated
1536765-1536967, (-)	LINE	Zorro3, 3' end, 5' truncated in 3' UTR
1537484-1539018, (+)	LTR*	korimako, Tcd33, truncated LTR, preceded by end of POL ORF and PPT.
1553428-1555597, (-)	DNA (Mut)	Mutator transposon
1583072-1585319, (-)	DNA (Mut)	Mutator transposon
1647482-1648974, (+)	uRTNf	partial gypsy-like Pol ORF
1648612-1648827, (-)	LTR	solo kahu, truncated
1649027-1649272, (-)	LTR	solo omicron
1710857-1711494, (+)	LTR	solo zeta
1780990-1781507, (-)	LTR	solo kahu
1852505-1853392, (+)	LINE	Zorro1-like, partial ORF1 (subtelomeric)
1853411-1854064, (-)	LTR*	Tcd21-like Gag ORF sections (subtelomeric)
1854555-1854801, (-)	LTR	solo iota (subtelomeric)
Chromosome 4
8433-10036, (-)	LINE	Zorro1-like, partial ORF1 (subtelomeric)
81452-81706, (+)	LTR	solo iota
90521-90781, (+)	LTR	solo rho
179639-180531, (+/-)	LTR*	kotuku, Tcd32, internally-deleted and rearranged element
242574-243093, (+)	LTR	solo episemon
243164-248298, (+/-)	LTR*	iota, Tcd23, two inverted LTRs flanking internal region
257231-257361, (+)	LTR	solo beta, partial
257527-257652, (+)	LTR	solo beta, truncated
257844-258112, (+)	LTR	solo kotuku
258288-258345, (+)	LTR	solo beta, partial
258639-258824, (+)	LTR	solo toroa, truncated
293868-294419, (+)	LTR	solo psi
458569-458955, (-)	LTR	solo xi
554234-554494, (-)	LTR	solo rho
603588-604058, (+)	LTR	solo eta
741465-741937, (-)	LTR	solo epsilon, truncated
790736-790966, (+)	LTR	solo rho
877460-877741, (-)	LTR	solo upsilon
878181-878474, (-)	LTR	solo psi, truncated
878475-878920, (-)	LTR	solo kereru
879251-879661, (-)	LTR	solo zeta
981280-983973, (+/-)	LINE	Zorro3, C-terminal half of ORF2 coding regions highly disrupted
1015406-1015921, (-)	LTR	solo episemon
1027685-1028182, (+)	LTR	solo episemon
1031868-1034116, (-)	DNA (Mut)	Mutator transposon
1041786-1042189, (+)	LTR	solo epsilon
1042190-1042508, (-)	LTR	solo psi, truncated
1063556-1063629, (-)	LTR	solo epsilon, truncated
1292690-1292924, (-)	LTR	solo rho, truncated
1292973-1293074, (-)	LINE	Zorro4, C-terminal end of ORF2 and start of 3' UTR
1293341-1294108, (-)	LINE	Zorro4-like, partial ORF2
1295038-1295319, (+)	LTR	solo lambda, truncated
1295338-1295584, (+)	LTR	solo iota
1295630-1295804, (-)	LTR	solo sampi, truncated
1297211-1297387, (+)	LTR	solo pi, internal deletion
1297388-1297489, (-)	LTR	solo epsilon, truncated
1386728-1387809, (+)	LTR	solo omega
1386750-1387219, (-)	LTR	solo eta
1390528-1391111, (-)	LTR	solo omega
1435744-1435920, (+)	LTR	solo phi
1436164-1436618, (-)	LTR	solo kappa
1436170-1436340, (-)	LTR	solo ruru
1469112-1469591, (-)	LTR	solo epsilon
1469621-1472577, (+/-)	LTR*	rho, Tcd21, LTR, PBS + Gag ORF sections + LTR on opposite strand
1469690-1469964, (-)	LTR	solo iota
1477655-1478179, (+)	LTR	solo zeta
1485464-1485827, (-)	LTR	solo moa, truncated
1633219-1633619, (+)	LINE	Zorro1-like, partial ORF1 (subtelomeric)
1633620-1634172, (-)	LTR*	huia, partial Tcd16 (subtelomeric)
1634174-1635509, (-)	LINE	Zorro4, partial ORF1 (subtelomeric)
Chromosome 5
6191-7985, (-)	LTR*	san, partial Tcd4 (subtelomeric)
15342-16707, (+)	LINE	Zorro4, partial ORF1 (subtelomeric)
16708-17137, (+)	LTR*	partial Tcd16 (subtelomeric)
17139-17517, (-)	LINE	Zorro1-like, partial ORF1 (subtelomeric)
279705-285984, (-)	LTR*	kotuku, Tcd32
326236-326635, (-)	LTR	solo epsilon
377487-378008, (-)	LTR	solo episemon
404394-404725, (-)	LTR	solo upsilon
413412-413928, (+)	LTR	solo episemon
413965-414584, (-)	LTR	solo moa, truncated
429997-430253, (-)	LTR	solo iota
438796-439226, (+)	LTR	solo episemon, truncated
593649-594128, (-)	LTR	solo epsilon
594131-594425, (+)	LTR	solo nu
616320-616505, (-)	LTR	solo phi
652689-652986, (-)	LTR	solo nu
660240-660989, (-)	uRTNf	3' end of copia-like Pol ORF
673906-680155, (-)	LTR*	kotuku, Tcd32
709990-711534, (+/-)	LTR*	iota, Tcd23, two inverted LTRs flanking remnants of ORFs and PBS
732978-733184, (+)	LTR	solo phi
755194-755664, (+)	LTR	solo zeta
791314-791496, (-)	LTR	solo kappa, partial
791498-791800, (+)	LTR	solo vau
791806-791939, (+)	LTR	solo tara, truncated
942524-942792, (-)	LTR	solo kotuku
994058-994315, (-)	LTR	solo iota
1093726-1093931, (-)	LTR	solo tara, partial
1161982-1162229, (+)	LTR	solo iota
1215656-1215858, (+)	LTR	solo pi, truncated
1230052-1230939, (+)	LINE	Zorro1-like, partial ORF1 (subtelomeric)
1230958-1231611, (-)	LTR*	Tcd21-like Gag ORF sections (subtelomeric)
1232115-1232361, (-)	LTR	solo iota (subtelomeric)
Chromosome 6
13162-13408, (+)	LTR	solo iota (subtelomeric)
13899-16493, (+)	LTR*	Tcd21-like partial ORFs + duplicated fragment (subtelomeric)
16512-17400, (-)	LINE	Zorro1-like, partial ORF1 (subtelomeric)
645097-645366, (-)	LTR	solo pi
753402-759521, (-)	LTR*	sampi, Tcd24
758567-758860, (+)	LTR	solo nu
759033-759503, (+)	LTR	solo eta
845112-849648, (+)	LTR*	lambda, Tcd14
847491-847732, (-)	LTR	solo upsilon
851692-852001, (+)	LTR	solo beta
929972-931163, (+)	LINE	Zorro1-like, 5' truncated ORF1 + 3' truncated ORF2
953643-953852, (-)	LTR	solo eta, truncated
1002161-1002580, (+)	LTR	solo epsilon, partial
1008042-1015021, (-)	LTR*	epsilon, Tcd25
1008591-1009106, (-)	LTR	solo episemon
1014499-1014876, (+)	LTR	solo san
1027339-1027788, (-)	LTR	solo epsilon
1031758-1031928, (+)	uRTNf	RT fragment similar to Tcd24
1031944-1032724, (-)	LTR	solo pi
1031950-1032476, (+)	LTR	solo sampi, internal deletion
1031968-1032447, (-)	LTR	solo epsilon
1032725-1032784, (-)	LTR	solo tara, truncated
1032939-1033239, (-)	LTR	solo psi
1063243-1063413, (-)	LTR	solo ruru
1064858-1065319, (-)	LTR	solo epsilon (subtelomeric)
Chromosome 7
44034-44549, (+)	LTR	solo episemon
124493-124654, (+)	LTR	solo psi, partial
204637-205051, (-)	LTR*	kotuku, Tcd32, most of internal region and most of right LTR missing
206006-206120, (+)	LTR	solo huia, truncated
231727-232029, (+)	LTR	solo vau
232381-232551, (-)	LTR	solo ruru
232555-232820, (+)	LTR	solo omicron
232849-233131, (-)	LTR	solo kappa
306457-306754, (-)	LTR	solo nu
378047-378325, (-)	LTR	solo kappa
427042-427197, (-)	LTR	solo episemon, truncated
427198-427627, (-)	LTR	solo epsilon, truncated
428433-434829, (+)	LTR*	episemon, Tcd27
443910-450318, (-)	LTR*	episemon, Tcd27
501546-502016, (+)	LTR	solo eta
508112-508240, (-)	LTR	solo huia
552588-552974, (+)	LTR	solo xi
639417-644592, (+/-)	LTR*	xi, Tcd29, internal regions rearranged
650241-651590, (+)	pTEDO	ORF containing Zorro-like EN coding sequence
669341-669620, (-)	LTR	solo epsilon, partial
779027-779497, (+)	LTR	solo eta
841842-842012, (-)	LTR	solo ruru
869370-869648, (+)	LTR	solo kappa
882594-888991, (+)	LTR*	nu, Tcd3
892069-893176, (-)	LINE	Zorro3, most of internal region deleted. Epsilon inserted in 3' UTR
892129-892614, (-)	LTR	solo epsilon
895442-895743, (-)	LTR	solo nu
914835-915304, (-)	LTR	solo eta
1011494-1011872, (+)	LINE	Zorro1-like, partial ORF1 (subtelomeric)
1011874-1012304, (-)	LTR*	partial Tcd16 (subtelomeric)
1012305-1013669, (-)	LINE	Zorro4, partial ORF1 (subtelomeric)
Chromosome R
6228-8997, (+)	LINE	Zorro1-like, 5' truncated ORF1 + 3' truncated ORF2 (subtelomeric)
9009-9106, (-)	LINE	Zorro1-like, partial ORF1 (subtelomeric)
83766-88860, (+/-)	LINE	Zorro3, 5' truncated near start of ORF1 and with segment of ORF2 inverted
88986-94337, (+)	LTR*	sampi, Tcd24
125064-127294, (+)	DNA (Mut)	Mutator transposon
172181-172456, (+)	LTR	solo kotuku
266903-267408, (+)	LTR	solo moa
284203-285934, (-)	DNA (Fot)	degenerate Cirt transposon
377163-377405, (-)	LTR	solo iota
430681-430956, (+)	LTR	solo rho
462147-462449, (-)	LTR	solo vau
527097-527489, (-)	LTR	solo psi, truncated
552698-553421, (-)	LINE	Zorro3-like, 5' truncated in ORF2
568385-570241, (-)	DNA (Fot)	degenerate Cirt transposon
572058-572672, (-)	LTR	solo psi
578152-578965, (+/-)	LTR*	kotuku, Tcd32, partial and rearranged element
610887-611167, (+)	LTR	solo kotuku
849906-855203, (-)	LINE	Zorro3, 5' truncated near start of ORF1
1029999-1030268, (-)	LTR	solo nu
1048376-1049794, (+)	LINE	Zorro3, missing most of ORF1 except extreme 5' end, and front half of ORF2
1095445-1095858, (-)	LTR	solo lambda
1174294-1174541, (+)	LTR	solo iota
1362822-1363113, (+)	LTR	solo toroa
1376060-1376245, (-)	LTR	solo koppa
1376815-1382043, (+)	LTR*	lambda, Tcd14
1400209-1400751, (-)	LTR	solo epsilon
1458841-1459060, (-)	LTR	solo upsilon
1459115-1459411, (-)	LTR	solo nu
1534425-1534945, (-)	LINE	Zorro4-like, 5' truncated in ORF2 and missing end of 3' UTR
1536626-1536698, (+)	LINE	Zorro4, 3' end
1597725-1598347, (-)	LTR	solo eta, truncated
1597749-1597937, (+)	LTR	solo phi
1598752-1598906, (+)	LTR	solo nu, internal deletion
1678166-1680360, (+)	DNA (Mut)	Mutator transposon
1857707-1859307, (+)	LTR*	zeta, Tcd7, partial LTR + Pol ORF region
1901882-1902085, (-)	LTR	solo chi
1976675-1976951, (-)	LTR	solo psi
1984045-1984275, (+)	LTR	solo psi, truncated
2025508-2025769, (-)	LTR	solo tara, truncated
2088071-2088448, (-)	LTR	solo san
2094275-2094529, (+)	LTR	solo omicron
2209732-2209939, (+)	LTR	solo upsilon, truncated
2209940-2210409, (-)	LTR	solo psi
2210413-2210540, (-)	LTR	solo kappa, partial
2249740-2250255, (-)	LTR	solo pi, truncated
2249798-2250080, (+)	LTR	solo tara
2250249-2250406, (+)	LTR	solo kappa, truncated
2256008-2257398, (-)	LTR*	pi, Tcd22, truncated LTR and Gag ORF (subtelomeric)
Notes: 1. The symbols (+) and (-) refer to the sense and anti-sense DNA strands respectively. The symbol (+/-) indicates that the element is distributed between both the sense and anti-sense strands.
2. Potentially active transposable elements are highlighted in yellow.
3. Abbreviations: DNA (Fot), DNA transposon of the Fot1 family; DNA (Mut), DNA transposon of the Mutator family; LINE, Long Interspersed Nuclear Element (also known as non-LTR retrotransposons); LTR, Long Terminal Repeat (LTR retrotransposons associated with some internal sequence are indicated by asterisks. The remainder are solo LTRs.); pTEDO, potential TE-derived ORF; uRTNf, unidentified retro…

## Sheet: Table S6
Table S6. Pseudogenes in the C. dubliniensis genome.
Systematic_ID	Product	Description	C. albicans positional orthologue
Chromosome 1
Cd36_00010	subtelomeric Y'-related helicase	Rearranged	None
Cd36_00230	MNN family member	Rearranged	None
Cd36_01135	GAG-like protein	Rearranged	orf19.3309
Cd36_01600	regulator of filamentous growth (FGR38)	Stop codons	orf19.4549
Cd36_01650	succinate-semialdehyde dehydrogenase	Single stop codon	orf19.4543
Cd36_02405	choline permease	Partial sequence	orf19.2946
Cd36_03620	conserved hypothetical protein	Frameshift / stop codons	orf19.4463
Cd36_04005	conserved hypothetical protein	Partial sequence	orf19.1060
Cd36_04885	conserved hypothetical protein	Partial sequence	orf19.4057
Cd36_05490	conserved hypothetical protein	Single stop codon	orf19.2468
Cd36_05630	conserved hypothetical protein	Partial sequence	orf19.2449
Cd36_05805	conserved hypothetical protein	Stop codons / frame-shift	orf19.2431
Cd36_05860	filament-induced protein	Rearranged / partial sequence	orf19.1825
Cd36_06975	conserved hypothetical protein	Partial sequence	orf19.2797
Cd36_07240	isocitrate dehydrogenase (in HOK of MRS)	Frameshift / stop codons	None
Cd36_07280	regulator of filamentous growth (FGR6-3)	Frameshift	orf19.4712
Cd36_07580	(multidrug resistance) CDR-family ABC transporter	Single stop codon	orf19.5079
Cd36_07800	conserved hypothetical protein	Frameshift / stop codons	None
Cd36_08745	regulator of filamentous growth (FGR43)	Frameshift	orf19.4786
Cd36_08875	conserved hypothetical protein	Stop codons / frame-shift	orf19.4803
Cd36_09765	conserved hypothetical protein	Partial sequence	orf19.4908
Cd36_10970	S-adenosylmethionine synthetase	Partial sequence	None
Cd36_11255	conserved hypothetical protein	Stop codons / frame-shift	orf19.5264
Cd36_11535	conserved hypothetical protein	Partial sequence	orf19.5233
Cd36_12190	aldo/keto reductase	Rearranged	None
Cd36_12155	conserved hypothetical protein	Stop codons / frame-shift	orf19.4936
Cd36_13335	conserved hypothetical protein	Partial sequence	orf19.7252
Cd36_13430	subtelomeric Y'-related helicase	Rearranged / partial sequence	None
Chromosome 2
Cd36_15020	subtelomeric Y'-related helicase	Rearranged / partial sequence	None
Cd36_15915	conserved hypothetical protein	Partial sequence	orf19.2024
Cd36_19290	regulator of filamentous growth (FGR51)	Stop codons	orf19.156
Cd36_20465	conserved hypothetical protein	Partial sequence	orf19.4115
Cd36_20810	oxidoreductase	Rearranged	None
Cd36_22000	conserved hypothetical protein	Frameshift	orf19.2210
Cd36_22020	potential regulator of salt tolerance	Frameshift	orf19.2208
Cd36_23345	conserved hypothetical protein	Partial sequence	orf19.4081
Cd36_24195	isocitrate dehydrogenase (MRS_1)	Frameshift / stop codons	None
Cd36_24425	isocitrate dehydrogenase (MRS_2)	Stop codons	None
Cd36_24810	subtelomeric Y'-related helicase	Rearranged / partial sequence	None
Chromosome 3
Cd36_80010	subtelomeric Y'-related helicase	Frameshift	None
Cd36_80890	LPF family protein	Partial sequence	None
Cd36_81215	conserved hypothetical protein	Partial sequence / stop codons	orf19.1724
Cd36_81710	beta-glucosidase	Rearranged	orf19.1664
Cd36_81870	conserved hypothetical protein (in RB2 of MRS)	Frameshift / single stop codon	None
Cd36_81880	isocitrate dehydrogenase (in MRS)	Frameshift / stop codons	None
Cd36_81940	conserved hypothetical protein	Partial sequence	None
Cd36_83195	conserved hypothetical protein	Partial sequence / stop codons	orf19.322
Cd36_83620	mitochondrial cell wall biogenesis protein	Frameshift / single stop codon	orf19.6958
Cd36_83695	conserved hypothetical protein	Partial sequence / stop codons	orf19.6949
Cd36_84185	conserved hypothetical protein	Partial sequence	orf19.5866
Cd36_85625	conserved hypothetical protein	Rearranged / partial sequence	orf19.7002
Cd36_87595	conserved hypothetical protein	Rearranged / partial sequence	orf19.6715
Cd36_87155	conserved hypothetical protein	Frame-shift / stop codons	orf19.6777
Cd36_87820	subtelomeric Y'-related helicase	Rearranged / partial sequence	None
Chromosome 4
Cd36_40080	subtelomeric Y'-related helicase	Rearranged / partial sequence	None
Cd36_43140	conserved hypothetical protein	Single stop codon	orf19.3364
Cd36_43670	conserved hypothetical protein (in RB2 of MRS_1)	Single stop codon	orf19.1208
Cd36_43675	isocitrate dehydrogenase (MRS_1)	Frameshift / stop codons	None
Cd36_44235	conserved hypothetical protein	Rearranged / partial sequence	orf19.3828
Cd36_45125	isocitrate dehydrogenase (MRS_2)	Frameshift / stop codons	None
Cd36_45130	regulator of filamentous growth (FGR6-10)	Frameshift	orf19.1234
Cd36_45360	conserved hypothetical protein	Frameshift / stop codon	orf19.1268
Cd36_46310	translin-associated protein X	Frameshift	orf19.3125
Cd36_46720	subtelomeric Y'-related helicase	Rearranged / partial sequence	None
Chromosome 5
Cd36_50010	subtelomeric Y'-related helicase	Rearranged / partial sequence	None
Cd36_50050	subtelomeric Y'-related helicase	Rearranged / partial sequence	None
Cd36_50580	hypothetical LPF family protein	Rearranged	orf19.931
Cd36_50425	conserved hypothetical protein	Rearranged	orf19.948
Cd36_50600	conserved hypothetical protein	Frameshift / stop codons	orf19.929
Cd36_51535	conserved hypothetical protein	Partial sequence / stop codons	orf19.3196
Cd36_52970	isocitrate dehydrogenase (MRS)	Partial sequence	None
Cd36_52975	conserved hypothetical protein (in RB2 of MRS)	Frameshift	None
Cd36_53010	hypothetical LPF family protein	Frameshift / stop codons	None
Cd36_53735	filamentous growth regulator (FGR42)	Partial sequence	orf19.3209
Cd36_53990	hypothetical LPF family protein	Rearranged	orf19.3919
Cd36_54135	conserved hypothetical protein	Partial sequence	orf19.3935
Chromosome 6
Cd36_60030	subtelomeric Y'-related helicase	Rearranged / partial sequence	None
Cd36_60525	conserved hypothetical protein	Stop codons	orf19.4196
Cd36_61550	putative membrane transport protein	Stop codons	orf19.3440
Cd36_61750	conserved hypothetical protein	Stop codons / frame-shift	orf19.3420
Cd36_61825	regulator of filamentous growth (FGR37)	Rearranged	orf19.3413
Cd36_63195	ribonuclease H	Stop codons	orf19.5564
Cd36_63710	hypothetical LPF family protein	Rearranged	orf19.5619
Cd36_63865	conserved hypothetical protein	Stop codons / frame-shift	orf19.5606
Cd36_64495	isocitrate dehydrogenase (in MRS)	Rearranged	None
Chromosome 7
Cd36_70010	subtelomeric Y'-related helicase	Rearranged / partial sequence	None
Cd36_70700	conserved hypothetical protein (in RB2 of MRS)	Frameshift / single stop codon	None
Cd36_70705	isocitrate dehydrogenase (in MRS_1)	Frameshift / stop codons	None
Cd36_71605	conserved hypothetical protein	Stop codons	orf19.6547
Cd36_72790	hypothetical LPF family protein	Rearranged	orf19.5140
Cd36_72385	isocitrate dehydrogenase (in MRS_2)	Stop codons	None
Cd36_72810	hypothetical LPF family protein	Frameshift / stop codons	orf19.5138
Cd36_73120	hypothetical LPF family protein	Frameshift / stop codons	None
Cd36_73230	hypothetical LPF family protein	Rearranged	orf19.5508
Cd36_73240	putative terminal protein/DNA-polymerase	Stop codons	None
Cd36_73585	conserved hypothetical protein	Stop codons	orf19.7192
Cd36_73885	conserved hypothetical protein	Rearranged / partial sequence	orf19.7151
Cd36_74030	subtelomeric Y'-related helicase	Rearranged / partial sequence	None
Chromosome R
Cd36_25010	subtelomeric Y'-related helicase	Rearranged / partial sequence	None
Cd36_25655	conserved hypothetical protein	Rearranged / partial sequence	orf19.7480
Cd36_25855	conserved hypothetical protein	Rearranged	orf19.3277
Cd36_26445	conserved hypothetical protein	Stop codons / frameshift	orf19.2530
Cd36_26600	putative cation transporter	Rearranged / partial sequence	orf19.2552
Cd36_26870	oligopeptide transporter	Single stop codon	orf19.2602*
Cd36_27195	conserved hypothetical protein	Stop codons / frameshift	orf19.3748
Cd36_27410	conserved hypothetical protein	Stop codons / frameshift	orf19.3719
Cd36_28820	integral inner mitochondrial membrane protein	Single stop codon	orf19.4380.1
Cd36_31080	hypothetical LPF family protein	Rearranged	orf19.6641
Cd36_31750	hypothetical LPF family protein	Rearranged	orf19.3877
Cd36_31770	hypothetical LPF family protein	Frameshift	orf19.3879
Cd36_33590	conserved hypothetical protein	Stop codons / frameshift	orf19.605
Cd36_33565	conserved hypothetical protein	Partial sequence	orf19.609
Cd36_34365	conserved hypothetical protein	Stop codons	orf19.7280
Cd36_34968	regulator of filamentous growth (FGR46)	Partial sequence	orf19.7557
Cd36_35600	subtelomeric Y'-related helicase	Rearranged / partial sequence	None
Note: * Cd36_26870 lies at the boundary of a chromosomal inversion and appears to have been duplicated in C. albicans. orf19.2583.1 is also a pseudogene in C. albicans.

## Sheet: Table S7
Table S7. Comparison of genomic repertoire for predicted GPI-proteins and protein families.
Singleton GPI-proteins
Locus		C. albicans	C. dubliniensis
Ssr1		orf19.7030	Cd36_70800
Pga12		orf19.7597	Cd36_35200
Mid1		orf19.3212	Cd36_53710
Pga6/Flo9		orf19.4765	Cd36_08570
Pga11		orf19.7609	Cd36_35266
Pga13		orf19.6420	Cd36_34100
Pga14		orf19.968	Cd36_50300
Pga16		orf19.848	Cd36_18410
Pga17		orf19.893	Cd36_18100
Pga18		orf19.300	Cd36_83030
Pga19		orf19.2033	Cd36_15850
Pga20		orf19.535	Cd36_29780
Pga21		orf19.532	Cd36_29770
Pga22		orf19.3738	Cd36_27270
Pga23		orf19.3740	Cd36_27260
Pga25		orf19.6336	Cd36_60170
Pga26		orf19.2475	Cd36_05430
Pga27		orf19.2044	Cd36_15740
Pga32		orf19.6784	Cd36_87090
Pga33		orf19.876	Cd36_18190
Pga34		orf19.2833	Cd36_27800
Pga35		orf19.4910	Cd36_09790
Pga38		orf19.2758	Cd36_42320
Pga39		orf19.6302	Cd36_30290
Pga40		orf19.1616	Cd36_82280
Pga43		orf19.2910	Cd36_45780
Pga44		orf19.1714	Cd36_81300
Pga45		orf19.2451	Cd36_05620
Pga46		orf19.3638	Cd36_22570
Eap1/Pga47		orf19.1401	Cd36_23630
Pga48		orf19.6321	Cd36_60095
Pga49		orf19.4404	Cd36_45500
Pga53		orf19.4651	Cd36_41360
Pga54		orf19.2685	Cd36_42920
Pga55		orf19.207	Cd36_23160
Pga56		orf19.1105.2	Cd36_53620
Pga58		orf19.4334	Cd36_52810
Pga60		orf19.5588	Cd36_64000
		orf19.4653*	Cd36_41340
		orf19.206 (similar to Pga55, orf19.207)	Cd36_23170
		orf19.7130	Cd36_73980
GPI-protein families
Family	Alias	C. albicans	C. dubliniensis
Family 1 chitinase	Cht1	orf19.7517	Cd36_25200
	Cht2	orf19.3895	Cd36_53830
Family 2 DFG-like	Dfg5	orf19.2075	Cd36_15490
	Pga51, DCW1	orf19.1989	Cd36_16220
Family 3 Ecm3-like#	Ecm33.1	orf19.4255	Cd36_52240
	Ecm33.3	orf19.3010.1	Cd36_02980
Family 4 exoglucanases#	Exg2	orf19.2952	Cd36_02450
	Spr1	orf19.2237	Cd36_21140
Family 5 Pga37/57^	Pga37	orf19.3923	Cd36_54030
	Pga57	orf19.4689	Cd36_41010
Family 6	Pga59	orf19.2767	Cd36_42250
	Pga62	orf19.2765	Cd36_42270
	Pga24, YWP1	orf19.3618	Cd36_22720
		orf19.3621*	Cd36_22710
Family 7 Yapsins#	Sap9	orf19.6928	Cd36_83850
	Sap10	orf19.3839	Cd36_44180
Family 8 Crh-like	Crh12	orf19.3966	Cd36_54410
	Utr2	orf19.1671	Cd36_81610
	Crh11	orf19.2706	Cd36_42770
Family 9 Sod-like#	Pga2, SOD4	orf19.2062	Cd36_15610
	Pga3, SOD5	orf19.2060	Cd36_15620
	Pga9, SOD6	orf19.2108	Cd36_15220
Family 10^	Pga15	orf19.2878	Cd36_65070
	Pga41	orf19.2906	Cd36_45820
	Pga42	orf19.2907	Absent (Cluster3472)
Family 11	Pga28	orf19.5144	Cd36_72760
	Pga36, Idh1	orf19.5760	Cd36_64370
	Pga50	orf19.1824	Absent (Cluster 73)
	Pga61	orf19.5762	Cd36_64390
	orf19.7130	orf19.7130	Cd36_73980
Family 12	Hwp1	orf19.1321	Cd36_43360
	Rbt1	orf19.1327	Cd36_43400
	Pga8, Hwp2	orf19.3380	Cd36_43420
Family 13	Pga29, Rhd3	orf19.5305	Cd36_43810
	Pga30	orf19.5303	Cd36_43790
	Pga31	orf19.5302	Cd36_43780
Family 14#	Plb3	orf19.6594	Cd36_34860
	Plb4	orf19.1442	Cd36_16240
	Plb5	orf19.5102	Cd36_07760
Family 15#	Csa1	orf19.7114	Cd36_70300
	Pga7	orf19.5635	Cd36_40180
	Pga10, Rbt8	orf19.5674	Cd36_40510
	Rbt5	orf19.5636	Cd36_40190
Family 16#	Pga4, Gas1	orf19.4035	Cd36_54990
	Pga5, Gas2	orf19.3693	Cd36_02200
	Phr1	orf19.3829	Cd36_44230
	Phr2	orf19.6081	Cd36_00220
Family 17	Als1	orf19.5741	No ortholog §
	Als2	orf19.1097	No ortholog §
	Als3	orf19.1816	Absent (Cluster5)
	Als4	orf19.4555	Cd36_64610
	Als5	orf19.5736	No ortholog §
		No ortholog §	Cd36_64210
		No ortholog §	Cd36_64800
		No ortholog §	Cd36_65010
	Als6	orf19.7414	Cd36_86290
	Als7	orf19.7400	Cd36_86150
	Als9	orf19.5742	Cd36_64220
Family 18#	Hyr1	orf19.4975	Absent (Cluster5204)
	Iff1	orf19.5124	Cd36_72940
	Iff2	orf19.575	Cd36_51670
	Iff3	orf19.4361	Cd36_28830
	Iff4	orf19.7472	Cd36_25710
	Iff5	orf19.2879	Cd36_46030
	Iff6	orf19.4072	Cd36_23280
	Iff7	orf19.3279	Cd36_25840
	Iff8	orf19.570	Cd36_50710
	Iff9	orf19.465	Cd36_29150
Family 19#	Pga52	orf19.1911	Cd36_15090
Family 20	Kre1	orf19.4377	Cd36_29000
	Pga1	orf19.7625	Cd36_35332
Note: * No GPI anchor attachment site predicted
# Only the GPI-anchored members of these families are included here
^ Families found only in C. albicans and C. dubliniensis and in none of the other CTG clade species.
§ ALS genes are probably subject to gene conversion events that have altered the distribution and sequence of gene copies after speciation of C. albicans and C. dubliniensis. Therefore, while both species possess five loci on chromosome 6, in largely corresponding positions, there is only orthology between some of the genes (see Figure 2).

## Sheet: Table S8
Table S8. Ratios of non-synonymous substitutions per site to synonymous substitutions per site (Dn/Ds) for orthologous gene pairs.
Sequence1	Sequence2	Dn	Ds	Dn/Ds	P-Value (Fisher)	Length (bp)	Sites:		Substitutions:
							Synonymous	Non-synonymous	Total	Synonymous	Non-synonymous
Cd36_00070	orf19.6109	0.0523721	1.12849	0.0464092	4.65921e-100	1530	338.945	1191.06	258	197.75	60.25
Cd36_00090	orf19.6102	0.0663573	0.689518	0.0962373	4.14947e-26	666	146.368	519.632	99	66	33
Cd36_00100	orf19.6103	0.159703	1.16577	0.136994	5.79353e-17	432	89.0382	342.962	102	52.6667	49.3333
Cd36_00110	orf19.6100	0.0665518	0.541392	0.122927	1.40999e-21	672	159.054	512.946	94	61.3333	32.6667
Cd36_00120	orf19.6099	0.0162629	0.696761	0.0233407	1.29996e-99	1620	376.824	1243.18	191	171	20
Cd36_00130	orf19.6096	0.118932	0.833246	0.142733	1.15622e-23	666	154.549	511.451	134	77.75	56.25
Cd36_00140	orf19.6094	0.0635246	0.674999	0.0941107	1.96379e-76	2085	429.518	1655.48	292	191.167	100.833
Cd36_00150	orf19.6092	0.0416151	0.684072	0.0608343	1.36388e-137	3021	655.726	2365.27	390	294.25	95.75
Cd36_00160	orf19.6091	0.0327309	0.760432	0.0430425	1.0549e-106	1866	440.119	1425.88	256	210.333	45.6667
Cd36_00170	orf19.6090	0.106347	0.454495	0.233989	3.48922e-18	1185	246.198	938.802	177	83.9167	93.0833
Cd36_00180	orf19.6086	0.0135047	0.540365	0.0249918	2.27445e-87	1737	392.092	1344.91	169	151	18
Cd36_00190	orf19.6085	NA	0.15188	0	NA	600	138.192	461.808	19	19	NA
Cd36_00200	orf19.6084	0.0605421	0.63741	0.0949815	7.45262e-24	636	137.401	498.599	88	59	29
Cd36_00210	orf19.6082	0.0269568	0.535524	0.0503373	7.45748e-48	1152	245.591	906.409	118	94	24
Cd36_00240	orf19.6080	0.0272834	0.564592	0.0483241	3.40626e-55	1284	263.836	1020.16	132	104.667	27.3333
Cd36_00250	orf19.6077	0.00833902	0.461566	0.0180668	4.11215e-73	1554	348.139	1205.86	130	120	10
Cd36_00260	orf19.6076	0.0710849	0.562295	0.126419	1.66143e-23	780	168.087	611.913	108	66.5	41.5
Cd36_00270	orf19.6075	0.00233247	0.341679	0.0068265	2.22621e-22	546	116.603	429.397	33	32	1
Cd36_00280	orf19.6074	0.0263476	0.455058	0.0578994	3.28539e-25	723	143.629	579.371	64	49	15
Cd36_00290	orf19.6073	0.0124465	0.244701	0.0508642	1.01227e-20	873	184.395	688.605	47	38.5	8.5
Cd36_00300	orf19.6072	0.20656	0.613198	0.336857	5.41684e-15	1206	265.389	940.611	281	111.167	169.833
Cd36_00310	orf19.6071	0.0606131	0.55296	0.109616	2.74532e-66	2235	456.087	1778.91	282	178.417	103.583
Cd36_00320	orf19.6070	0.0155447	0.407906	0.0381086	7.05361e-119	3201	731.019	2469.98	268	230	38
Cd36_00330	orf19.6068	0.0206681	0.425865	0.0485322	4.82481e-41	1146	238.513	907.487	96	77.5	18.5
Cd36_00340	orf19.6066	0.0095716	0.405022	0.0236323	2.61929e-66	1626	364.273	1261.73	126	114	12
Cd36_00350	orf19.6065	0.0431162	0.595938	0.0723501	1.71533e-37	969	193.349	775.651	112	79.5	32.5
Cd36_00360	orf19.6064	0.0159802	0.406735	0.0392891	1.18374e-62	1674	377.45	1296.55	139	118.5	20.5
Cd36_00370	orf19.6063	0.0204894	0.467525	0.0438252	4.69872e-55	1434	296.064	1137.94	126	103	23
Cd36_00390	orf19.6062	0.0122944	0.263635	0.0466341	6.26122e-09	318	71.9803	246.02	19	16	3
Cd36_00400	orf19.6061	0.0136092	0.422283	0.0322276	7.11397e-52	1323	284.922	1038.08	106	92	14
Cd36_00410	orf19.6060	0.00510376	0.379418	0.0134516	6.08125e-92	2253	483.588	1769.41	153	144	9
Cd36_00420	orf19.6059	0.021923	0.288676	0.0759433	3.45717e-09	357	79.295	277.705	25	19	6
Cd36_00430	orf19.6058	0.0322826	0.479771	0.0672875	1.35975e-34	1026	203.155	822.845	98	72	26
Cd36_00440	orf19.6057	0.0262518	0.420033	0.0624993	4.85953e-32	927	209.88	717.12	86	67.5	18.5
Cd36_00450	orf19.6056	0.0391092	0.440151	0.088854	4.25764e-20	666	141.162	524.838	67	47	20
Cd36_00460	orf19.6055	0.0236619	0.449634	0.0526248	3.87359e-89	2439	549.986	1889.01	230	186	44
Cd36_00470	orf19.6054	0.0214599	0.563636	0.0380741	1.24571e-99	2166	464.34	1701.66	220	184	36
Cd36_00480	orf19.6053	0.0437196	0.57243	0.0763754	4.99644e-72	1908	424.591	1483.41	233	170	63
Cd36_00490	orf19.6052	0.0251816	0.507886	0.0495812	3.09906e-46	1170	241.216	928.784	112	89	23
Cd36_00500	orf19.6049	0.0973268	0.549782	0.177028	8.15096e-55	2376	550.043	1825.96	381	214.333	166.667
Cd36_00510	orf19.6048	0.0300482	0.50817	0.0591302	5.33135e-37	927	214.029	712.971	100	79	21
Cd36_00520	orf19.6047	0.0061285	0.27058	0.0226495	1.84018e-38	1278	294.963	983.037	73	67	6
Cd36_00530	orf19.6046	0.0411959	0.522111	0.0789026	2.30175e-159	4599	1031.58	3567.42	531	388	143
Cd36_00540	orf19.6045	0.0146289	0.57832	0.0252954	4.28898e-92	1770	389.462	1380.54	177	157	20
Cd36_00550	orf19.6044	0.0215811	0.386143	0.055889	1.86138e-31	939	210.397	728.603	79	63.5	15.5
Cd36_00560	orf19.6043	0.0438932	0.662688	0.0662351	7.32594e-78	1743	394.295	1348.71	231	173.5	57.5
Cd36_00570	orf19.6041	0.0581715	0.423852	0.137245	1.57626e-84	3900	824.1	3075.9	439	266.833	172.167
Cd36_00580	orf19.6040	0.00183736	0.301075	0.00610268	3.83663e-24	678	133.075	544.925	34	33	1
Cd36_00590	orf19.6039	0.00627981	0.445222	0.0141049	9.48187e-47	1011	211.46	799.54	76	71	5
Cd36_00600	orf19.6038	0.0715672	0.558861	0.128059	1.79819e-48	1734	364.211	1369.79	237	143.5	93.5
Cd36_00610	orf19.6037	0.0306026	0.457818	0.0668445	8.53522e-68	2121	420.242	1700.76	195	144	51
Cd36_00620	orf19.6036	0.0426535	0.402988	0.105843	1.52081e-71	3018	606.227	2411.77	289	189	100
Cd36_00630	orf19.6035	0.0172986	0.139695	0.123831	0.000220986	363	70.6124	292.388	14	9	5
Cd36_00650	orf19.6033	0.0318897	0.28053	0.113677	1.64818e-33	1812	386.689	1425.31	135	90.5	44.5
Cd36_00660	orf19.6032	0.0929203	0.317148	0.292987	1.55299e-13	1419	291.929	1127.07	174	75.5	98.5
Cd36_00670	orf19.6031	0.102176	0.38452	0.265723	6.22015e-28	2415	498.328	1916.67	333	149.917	183.083
Cd36_00680	orf19.6029	0.064585	0.254062	0.25421	1.18519e-08	780	174.011	605.989	75	37.5	37.5
Cd36_00690	orf19.6028	0.122318	0.469212	0.260688	2.01949e-30	2226	469.465	1756.54	362	163.75	198.25
Cd36_00740	orf19.6027	0.200729	0.553278	0.3628	1.12149e-10	1077	210.6	866.4	235	82.4167	152.583
Cd36_00760	orf19.6025	0.0830702	0.455826	0.182241	9.80426e-13	660	125.887	534.113	85	43	42
Cd36_00770	orf19.6024	0.129595	0.335526	0.386246	3.84742e-07	1026	190.683	835.317	151	51.5833	99.4167
Cd36_00780	orf19.6023	0.0395678	0.39276	0.100743	7.02467e-47	1791	411.56	1379.44	179	125.833	53.1667
Cd36_00790	orf19.6022	0.0829084	0.45519	0.18214	9.23011e-34	1707	369.253	1337.75	231	126	105
Cd36_00800	orf19.6021	0.225155	0.494388	0.455422	3.3876e-05	705	154.447	550.553	163	55.9167	107.083
Cd36_00810	orf19.6020	0.058593	0.35887	0.163271	5.22147e-18	990	197.514	792.486	101	56.3333	44.6667
Cd36_00820	orf19.6018	0.0499654	0.428013	0.116738	9.72673e-52	2088	450.207	1637.79	226	146.833	79.1667
Cd36_00830	orf19.6017	0.101402	0.46025	0.220319	1.42072e-25	1563	324.148	1238.85	229	111.5	117.5
Cd36_00840	orf19.6016	0.0337194	0.361954	0.0931593	7.20262e-54	2136	470.477	1665.52	190	135.083	54.9167
Cd36_00850	orf19.6014	0.00833727	0.291322	0.0286188	5.11495e-19	615	132.555	482.445	36	32	4
Cd36_00860	orf19.6013	0.037645	0.410974	0.0915994	8.03355e-15	516	107.457	408.543	49	34	15
Cd36_00870	orf19.6012	0.0207993	0.457577	0.0454554	1.07286e-142	3834	811.611	3022.39	340	278	62
Cd36_00880	orf19.6011	0.0349617	0.49549	0.07056	2.56086e-145	4233	905.461	3327.54	442	328.333	113.667
Cd36_00900	orf19.6010	0.00195438	0.342393	0.00570802	5.98167e-79	1959	421.989	1537.01	119	116	3
Cd36_00910	orf19.6009	0.0414471	0.554047	0.0748079	2.82612e-113	3093	666.736	2426.26	359	261.167	97.8333
Cd36_00940	orf19.3288	0.0325213	0.49274	0.0660009	5.02689e-60	1641	360.612	1280.39	171	130.25	40.75
Cd36_00950	orf19.3289	0.0792436	0.39256	0.201864	7.55237e-19	1089	243.487	845.513	138	74.4167	63.5833
Cd36_00960	orf19.3290	0.016581	0.240334	0.0689915	2.1284e-10	468	102.125	365.875	27	21	6
Cd36_00970	orf19.3291	0.0162169	0.359305	0.045134	6.88828e-32	1017	206.668	810.332	72	59	13
Cd36_00980	orf19.3292	0.0190727	0.47055	0.0405328	1.95463e-19	441	95.8468	345.153	40	33.5	6.5
Cd36_00990	orf19.3293	0.00957254	0.550213	0.0173979	6.63377e-50	936	200.065	735.935	85	78	7
Cd36_01000	orf19.3294	0.00869461	0.283314	0.0306889	2.71996e-14	453	105.955	347.045	28	25	3
Cd36_01010	orf19.3295	0.0324447	0.46594	0.0696328	2.31212e-48	1422	303.993	1118.01	141	105.5	35.5
Cd36_01020	orf19.3296	0.0816481	0.469491	0.173908	5.42435e-31	1503	326.694	1176.31	205	114	91
Cd36_01030	orf19.3297	0.0316295	0.419127	0.0754652	9.95929e-11	306	63.8442	242.156	28	20.5	7.5
Cd36_01040	orf19.3298	0.0246869	0.495529	0.0498194	3.36934e-261	6756	1450.96	5305.04	655	526.167	128.833
Cd36_01050	orf19.3300	0.0203272	0.318105	0.0639008	3.68244e-38	1467	311.796	1155.2	104	80.8333	23.1667
Cd36_01060	orf19.3301	0.0359691	0.36665	0.0981019	1.12312e-51	2142	462.054	1679.95	193	134	59
Cd36_01070	orf19.3302	0.0496812	0.379538	0.130899	1.04651e-44	2100	456.612	1643.39	215	136	79
Cd36_01080	orf19.3303	0.0645498	0.433935	0.148755	9.97148e-44	2067	434.018	1632.98	244	143	101
Cd36_01090	orf19.3304	0.0298206	0.415182	0.0718254	3.0042e-26	810	177.209	632.791	75	56.5	18.5
Cd36_01100	orf19.3305	0.0518487	0.479262	0.108184	3.33827e-61	2214	460.739	1753.26	251	163.167	87.8333
Cd36_01110	orf19.3306	0.0990789	0.505006	0.196193	9.7179e-35	1818	383.221	1434.78	274	140.833	133.167
Cd36_01120	orf19.3307	0.0643994	0.450702	0.142887	3.76153e-33	1389	311.415	1077.59	172	105.5	66.5
Cd36_01130	orf19.3308	0.019282	0.43892	0.0439306	8.16195e-73	1920	422.855	1497.14	169	140.5	28.5
Cd36_01140	orf19.3310	0.0281593	0.46193	0.0609601	8.15165e-28	750	171.071	578.929	75	59	16
Cd36_01150	orf19.3311	0.0310456	0.465369	0.0667118	3.48855e-36	1047	224.952	822.048	103	78	25
Cd36_01160	orf19.3312	0.0272217	0.527899	0.0515662	1.02801e-75	1872	394.461	1477.54	189	149.5	39.5
Cd36_01170	orf19.3314	0.0113171	0.559111	0.0202413	4.45815e-24	450	93.8799	356.12	41	37	4
Cd36_01180	orf19.3315	0.0508097	0.482898	0.105218	6.91867e-36	1263	260.493	1002.51	142	92.75	49.25
Cd36_01190	orf19.3317	NA	0.302733	0	NA	345	64.2342	280.766	16	16	NA
Cd36_01200	orf19.3318	0.0569686	0.550864	0.103417	5.04909e-70	2250	481.822	1768.18	285	188	97
Cd36_01210	orf19.3319	0.0564068	0.482712	0.116854	5.34043e-26	954	199.462	754.538	112	71	41
Cd36_01220	orf19.3321	0.0189882	0.359333	0.052843	1.02086e-46	1524	323.993	1200.01	115	92.5	22.5
Cd36_01230	orf19.3322	0.0139841	0.371272	0.0376652	4.4698e-18	477	116.106	360.894	39	34	5
Cd36_01240	orf19.3323	0.0478289	0.723642	0.0660947	1.78645e-40	864	184.179	679.821	117	85.5	31.5
Cd36_01250	orf19.3324	NA	0.137455	0	NA	1191	262.751	928.249	33	33	NA
Cd36_01260	orf19.3325	0.0745912	0.433507	0.172064	1.34844e-38	1980	423.704	1556.3	250	139.5	110.5
Cd36_01280	orf19.3327	0.0267931	0.495587	0.0540633	8.3396e-64	1653	361.215	1291.79	165	131	34
Cd36_01290	orf19.3328	0.03485	0.591439	0.0589241	1.8084e-74	1797	372.738	1424.26	201	152.5	48.5
Cd36_01300	orf19.3329	0.0350032	0.549335	0.0637193	1.38789e-60	1473	342.362	1130.64	172	133.333	38.6667
Cd36_01310	orf19.3330	0.0136661	0.54097	0.0252623	8.28192e-52	1038	225.735	812.265	98	87	11
Cd36_01320	orf19.3330	1.10134	2.84723	0.386809	0.00876048	396	85.9294	310.071	242	63	179
Cd36_01330	orf19.3331	0.0209336	0.443457	0.0472055	3.48162e-63	1698	365.907	1332.09	150	122.5	27.5
Cd36_01340	orf19.3332	0.0205342	0.433859	0.0473293	1.06672e-107	2976	655.665	2320.34	263	216	47
Cd36_01350	orf19.3333	0.044395	0.440043	0.100888	1.96989e-36	1290	280.873	1009.13	137	93.5	43.5
Cd36_01360	orf19.3334	NA	0.105711	0	NA	747	182.558	564.442	18	18	NA
Cd36_01370	orf19.3335	NA	0.22784	0	NA	600	132.325	467.675	26	26	NA
Cd36_01380	orf19.3337	0.061171	0.344212	0.177713	1.56328e-12	717	146.718	570.282	74	40.5	33.5
Cd36_01390	orf19.3340	0.0018291	0.242173	0.00755287	1.65177e-21	702	154.616	547.384	33	32	1
Cd36_01400	orf19.3341	0.00682436	0.333227	0.0204796	1.24776e-64	1866	393.983	1472.02	116	106	10
Cd36_01410	orf19.3342	0.059574	0.549944	0.108327	2.47977e-54	1809	377.171	1431.83	229	147	82
Cd36_01420	orf19.3344	0.0244418	0.470904	0.051904	1.4815e-58	1557	330.278	1226.72	145	115.5	29.5
Cd36_01430	orf19.3345	0.235715	0.469062	0.502523	5.58067e-20	4326	955.874	3370.13	1015	333.333	681.667
Cd36_01440	orf19.3347	NA	0.439264	0	NA	519	114.3	404.7	38	38	NA
Cd36_01450	orf19.3348	0.00726041	0.301454	0.0240846	2.3754e-17	528	112.797	415.203	31	28	3
Cd36_01460	orf19.3349	0.00242538	0.338541	0.00716421	1.03345e-145	3702	811.181	2890.82	228	221	7
Cd36_01470	orf19.3350	0.02563	0.207934	0.12326	3.74231e-13	879	184.473	694.527	51	33.5	17.5
Cd36_01480	orf19.3351	0.0550186	0.410285	0.134098	3.03948e-20	870	181.957	688.043	94	57.5	36.5
Cd36_01490	orf19.3352	0.0316803	0.354815	0.0892869	1.58636e-25	993	219.319	773.681	86	62	24
Cd36_01500	orf19.3353	0.00563418	0.395042	0.0142622	2.24304e-29	681	146.533	534.467	48	45	3
Cd36_01510	orf19.5341	0.00828654	0.249117	0.0332637	5.09194e-21	786	179.272	606.728	43	38	5
Cd36_01520	orf19.3355	0.0195655	0.437521	0.0447191	6.48738e-51	1380	292.622	1087.38	118	97	21
Cd36_01530	orf19.3356	0.0944285	0.469082	0.201305	1.89977e-79	4734	949.87	3784.13	667	331.25	335.75
Cd36_01540	orf19.3357	0.0495891	0.365592	0.13564	1.58456e-12	510	114.045	395.955	52	33	19
Cd36_01550	orf19.3358	0.011028	0.158315	0.0696584	5.05091e-15	969	238.225	730.775	42	34	8
Cd36_01560	orf19.3359	0.0545709	0.356707	0.152985	8.15443e-53	2994	615.892	2378.11	300	174.833	125.167
Cd36_01570	orf19.3360	0.112289	0.274344	0.409301	1.82899e-10	1932	410.565	1521.43	253	94.3333	158.667
Cd36_01580	orf19.4551	0.0156994	0.343258	0.0457364	1.22954e-70	2364	497.393	1866.61	166	137	29
Cd36_01590	orf19.4550	0.0293786	0.361206	0.0813348	6.62524e-51	1899	423.85	1475.15	164	121.5	42.5
Cd36_01610	orf19.4548	0.0463809	0.34894	0.132919	7.08881e-23	1113	234.752	878.248	105	65.5	39.5
Cd36_01620	orf19.4546	0.0121749	0.339582	0.0358525	5.51781e-62	1872	422.915	1449.09	133	115.5	17.5
Cd36_01630	orf19.4545	0.0304912	0.5326	0.0572497	5.31722e-119	3042	649.068	2392.93	319	247.5	71.5
Cd36_01640	orf19.4544	0.0973482	0.534447	0.182147	4.39941e-15	678	141.279	536.721	103	54	49
Cd36_01660	orf19.4542	0.0333578	0.470964	0.0708289	1.98329e-40	1185	250.188	934.812	118	87.5	30.5
Cd36_01670	orf19.4540	0.00439651	0.491233	0.00894995	1.54287e-29	570	113.759	456.241	43	41	2
Cd36_01680	orf19.4539	0.0369186	0.517365	0.0713589	1.49941e-21	552	121.739	430.261	61	45.5	15.5
Cd36_01690	orf19.4538	0.00900133	0.52678	0.0170874	2.43068e-38	720	161.186	558.814	66	61	5
Cd36_01700	orf19.4537	0.0214571	0.426324	0.0503305	7.16573e-33	909	199.883	709.117	80	65	15
Cd36_01710	orf19.4536	0.015464	0.398318	0.0388231	7.09432e-56	1488	344.629	1143.37	124	106.5	17.5
Cd36_01720	orf19.4535	0.043525	0.497439	0.0874982	4.36456e-75	2322	512.898	1809.1	263	186.5	76.5
Cd36_01730	orf19.4534	0.0762059	0.504928	0.150924	4.746e-37	1527	340.174	1186.83	211	125	86
Cd36_01740	orf19.4533	0.0377741	0.518957	0.0727884	3.06106e-55	1509	341.745	1167.25	171	128	43
Cd36_01750	orf19.4532	0.0178724	0.369003	0.0484342	6.50143e-32	1002	209.298	792.702	75	61	14
Cd36_01760	orf19.4531	0.0275685	0.490937	0.056155	2.00627e-144	3822	848.009	2973.99	386	305.5	80.5
Cd36_01790	orf19.4529	0.0421093	0.398264	0.105732	7.64639e-14	504	113.27	390.73	51	35	16
Cd36_01800	orf19.4528	0.0191028	0.320503	0.0596025	1.63237e-15	543	118.857	424.143	39	31	8
Cd36_01810	orf19.3076	0.0962901	0.868255	0.110901	1.10776e-17	396	97.2124	298.788	77	50	27
Cd36_01840	orf19.4527	0.0134811	0.388739	0.034679	1.09372e-59	1635	362.606	1272.39	127	110	17
Cd36_01850	orf19.4526	0.00763628	0.225413	0.0338768	6.74661e-25	1026	236.27	789.73	52	46	6
Cd36_01860	orf19.4525	0.0200534	0.395302	0.0507293	1.96355e-29	849	192.025	656.975	72	59	13
Cd36_01870	orf19.4524	0.0188544	0.400749	0.0470479	3.28526e-70	2103	438.067	1664.93	167	136	31
Cd36_01880	orf19.4523	0.0550227	0.582077	0.0945282	7.50951e-23	618	134.205	483.795	80	54.3333	25.6667
Cd36_01890	orf19.4522	0.0441304	0.502042	0.0879019	6.5466e-15	423	92.4449	330.555	48	33.8333	14.1667
Cd36_01900	orf19.3661	0.0278155	0.46562	0.0597386	3.25355e-85	2457	516.036	1940.96	232	179	53
Cd36_01910	orf19.3663	0.015128	0.415425	0.0364157	1.39403e-97	2580	576.853	2003.15	214	184	30
Cd36_01930	orf19.3664	0.0434205	0.29271	0.14834	2.66905e-17	987	216.629	770.371	85	52.5	32.5
Cd36_01940	orf19.3665	0.0401521	0.576021	0.0697061	6.33365e-44	1134	238.774	895.226	131	96	35
Cd36_01950	orf19.3666	0.0500116	0.536172	0.0932751	7.0524e-49	1485	317.176	1167.82	178	121.5	56.5
Cd36_01960	orf19.3667	0.0279243	0.483458	0.0577596	6.71116e-58	1608	331.135	1276.86	153	118	35
Cd36_01970	orf19.3668	0.0126831	0.280914	0.0451492	3.77887e-43	1635	362.779	1272.22	101	85	16
Cd36_01990	orf19.3670	0.0254625	0.375439	0.0678207	6.29945e-45	1545	326.711	1218.29	127	96.5	30.5
Cd36_02000	orf19.3672	0.0174983	0.367934	0.0475582	8.46848e-65	2025	435.013	1589.99	154	126.5	27.5
Cd36_02010	orf19.3673	0.0228998	0.36067	0.0634924	1.08564e-16	504	112.343	391.657	41	32.1667	8.83333
Cd36_02020	orf19.3674	0.0452721	0.525118	0.0862133	8.48622e-34	957	209.647	747.353	112	79.1667	32.8333
Cd36_02030	orf19.3675	0.0198082	0.396092	0.0500089	5.62462e-38	1158	237.231	920.769	91	73	18
Cd36_02040	orf19.3676	0.0230908	0.279842	0.0825139	7.71117e-20	936	188.385	747.615	61	44	17
Cd36_02050	orf19.3677	0.0547775	0.322796	0.169697	7.87261e-14	819	175.364	643.636	80	46	34
Cd36_02060	orf19.3678	0.148324	0.50503	0.293693	1.84005e-21	1629	363.935	1265.07	304	133.75	170.25
Cd36_02070	orf19.3679	0.0326264	0.31968	0.10206	1.12123e-17	768	172.891	595.109	64	45	19
Cd36_02090	orf19.3681	0.0128121	0.273889	0.0467786	6.58729e-66	2622	575.292	2046.71	158	132	26
Cd36_02100	orf19.3682	0.0522518	0.310859	0.168088	5.62065e-12	708	153.25	554.75	67	39	28
Cd36_02110	orf19.3683	0.0432008	0.190911	0.226287	2.80179e-10	1083	225.452	857.548	74	38	36
Cd36_02120	orf19.3684	0.115327	0.365548	0.31549	9.67265e-10	876	210.254	665.746	132	60.8333	71.1667
Cd36_02130	orf19.3685	0.121744	0.411262	0.296026	3.12886e-29	2832	571.748	2260.25	435	181	254
Cd36_02140	orf19.3686	0.124765	0.296117	0.421336	2.54554e-06	1047	213.229	833.771	148	52.1667	95.8333
Cd36_02150	orf19.3687	0.144294	0.306865	0.470218	0.0230835	357	67.5029	289.497	55	17	38
Cd36_02160	orf19.3688	0.118399	0.302871	0.390922	0.00524028	333	68.2235	264.776	46	17	29
Cd36_02190	orf19.3691	0.114498	0.33981	0.336947	1.64611e-07	768	176.274	591.726	111	48.1667	62.8333
Cd36_02200	orf19.3693	0.0908936	0.351562	0.258542	3.80989e-22	1893	399.651	1493.35	240	112.167	127.833
Cd36_02210	orf19.3694	0.148946	0.417431	0.356815	5.71289e-28	3399	712.486	2686.51	591	228.083	362.917
Cd36_02220	orf19.2925	0.0604197	0.32186	0.187721	2.80588e-09	552	112.724	439.276	55	29.5	25.5
Cd36_02230	orf19.2926	0.191872	0.407555	0.470788	7.97911e-12	2340	474.411	1865.59	465	149.167	315.833
Cd36_02240	orf19.2927	0.059255	0.2624	0.225819	5.58689e-15	1323	271.362	1051.64	120	60.0833	59.9167
Cd36_02250	orf19.2928	0.0490194	0.216353	0.226572	2.58553e-11	1056	234.113	821.887	83	44	39
Cd36_02270	orf19.2929	0.00540016	0.234687	0.0230101	8.63754e-143	5691	1230.67	4460.33	272	248	24
Cd36_02290	orf19.2930	0.0153311	0.265417	0.0577623	2.99351e-45	1899	432.817	1466.18	119	96.75	22.25
Cd36_02300	orf19.2933	0.036553	0.437568	0.0835366	2.71544e-30	999	214.17	784.83	99	71	28
Cd36_02310	orf19.2934	0.0421118	0.224093	0.187921	7.25177e-07	528	100.664	427.336	37	19.5	17.5
Cd36_02320	orf19.2935	0.00194507	0.177915	0.0109326	3.42996e-15	660	145.214	514.786	24	23	1
Cd36_02330	orf19.2936	0.0752683	0.21114	0.356485	0.00312748	450	86.9456	363.054	42	16	26
Cd36_02340	orf19.2937	0.0142883	0.160844	0.0888334	6.85538e-11	756	155.423	600.577	31	22.5	8.5
Cd36_02350	orf19.2938	0.0881567	0.383401	0.229933	2.90843e-27	1968	406.993	1561.01	252	122.167	129.833
Cd36_02360	orf19.2939	0.0123711	0.183756	0.0673238	6.42423e-11	624	134.989	489.011	28	22	6
Cd36_02370	orf19.2940	0.0269758	0.26486	0.101849	8.82693e-14	714	147.886	566.114	48	33	15
Cd36_02380	orf19.2941	0.0473839	0.384803	0.123138	2.34368e-41	1695	431.881	1263.12	188	130	58
Cd36_02400	orf19.2945	0.0176749	0.464667	0.0380379	3.17798e-69	1692	375.33	1316.67	153	130	23
Cd36_02410	orf19.2947	0.00886842	0.297538	0.029806	2.95001e-27	876	195.434	680.566	54	48	6
Cd36_02420	orf19.2948	0.0602768	0.396687	0.151951	1.18735e-16	747	162.843	584.157	84	50.1667	33.8333
Cd36_02430	orf19.2949	0.0280836	0.53487	0.0525056	1.94826e-176	4371	942.656	3428.34	455	360.5	94.5
Cd36_02440	orf19.2951	0.0189191	0.314254	0.0602033	3.12211e-30	1077	247.347	829.653	79	63.5	15.5
Cd36_02450	orf19.2952	0.024489	0.439774	0.0556855	9.1197e-50	1434	299.533	1134.47	127	99.6667	27.3333
Cd36_02460	orf19.2953	0.007556	0.247209	0.0305653	4.33042e-14	513	113.961	399.039	27	24	3
Cd36_02480	orf19.2956	0.0342594	0.602558	0.0568566	7.72074e-37	813	185.923	627.077	98	77	21
Cd36_02490	orf19.2957	0.0483175	0.637453	0.0757977	7.808e-94	2424	500.677	1923.32	305	215	90
Cd36_02500	orf19.2958	0.120387	0.501447	0.240079	1.78637e-39	2526	546.471	1979.53	420	199.833	220.167
Cd36_02510	orf19.2960	0.00685681	0.400297	0.0171293	1.05269e-61	1488	315.936	1172.06	106	98	8
Cd36_02520	orf19.2961	0.0823076	0.409456	0.201017	1.50989e-19	1179	236.112	942.888	148	74.5	73.5
Cd36_02530	orf19.2962	0.133991	0.474399	0.282444	4.44041e-12	867	190.576	676.424	150	67	83
Cd36_02540	orf19.2963	0.0305585	0.495269	0.0617007	4.01377e-35	918	200	718	94	72.5	21.5
Cd36_02550	orf19.2964	0.0152507	0.480212	0.0317583	2.36256e-103	2382	527.292	1854.71	215	187	28
Cd36_02560	orf19.2965	0.00719792	0.385273	0.0186827	3.36095e-41	1050	212.42	837.58	70	64	6
Cd36_02580	orf19.2966	0.00675366	0.502714	0.0134344	3.88697e-39	756	161.058	594.942	63	59	4
Cd36_02590	orf19.2967	0.00869715	0.29717	0.0292665	7.28391e-33	1050	240.463	809.537	66	59	7
Cd36_02600	orf19.2968	0.247663	1.05762	0.23417	6.48382e-13	579	112.008	466.992	162	63.5	98.5
Cd36_02610	orf19.2969	0.0268229	0.613036	0.0437542	1.21039e-118	2538	532.859	2005.14	276	223.167	52.8333
Cd36_02620	orf19.2970	0.0162204	0.494593	0.0327955	9.04653e-186	4212	940.216	3271.78	393	340.5	52.5
Cd36_02630	orf19.2971	0.0558786	0.422496	0.132258	1.32902e-39	1746	364.016	1381.98	192	117.583	74.4167
Cd36_02640	orf19.2972	0.0317188	0.375203	0.0845377	2.67013e-44	1683	354.814	1328.19	146	104.75	41.25
Cd36_02650	orf19.2973	0.0607126	0.513868	0.118148	2.04845e-56	2004	430.789	1573.21	252	160.25	91.75
Cd36_02660	orf19.2974	0.00851846	0.304804	0.0279474	3.04656e-19	600	127.76	472.24	36	32	4
Cd36_02670	orf19.2975	0.0452757	0.462742	0.0978422	1.25829e-26	864	192.572	671.428	96	66.5	29.5
Cd36_02680	orf19.2977	0.0601601	0.302119	0.199127	8.18667e-12	753	164.871	588.129	75	41	34
Cd36_02690	orf19.2978	0.0466921	0.394062	0.118489	5.22115e-10	372	84.8237	287.176	39	26	13
Cd36_02700	orf19.2980	0.117242	0.56948	0.205875	1.77373e-41	2145	448.196	1696.8	363	178.833	184.167
Cd36_02710	orf19.2982	0.0441496	0.507801	0.0869426	2.97398e-46	1428	296.811	1131.19	158	109.5	48.5
Cd36_02720	orf19.2983	0.0261429	0.444027	0.0588768	6.2062e-39	1110	234.258	875.742	101	78.5	22.5
Cd36_02730	orf19.2984	0.0197352	0.551413	0.0357902	1.03019e-62	1365	286.849	1078.15	133	112	21
Cd36_02740	orf19.2985	0.0460795	0.395533	0.1165	1.03533e-13	504	123.623	380.377	55	38	17
Cd36_02750	orf19.2986	0.00345191	0.550256	0.00627329	4.11637e-23	375	84.6384	290.362	34	33	1
Cd36_02760	orf19.2987	0.0288684	0.490305	0.0588785	1.01924e-66	1785	384.337	1400.66	178	138.333	39.6667
Cd36_02770	orf19.2988	0.0413599	0.551273	0.0750261	2.75329e-46	1263	268.967	994.033	145	105	40
Cd36_02780	orf19.2989	0.0263468	0.467788	0.056322	1.57318e-39	1026	234.169	791.831	102	81.5	20.5
Cd36_02800	orf19.2991	0.0230223	0.492151	0.0467789	4.91241e-71	1758	390.705	1367.3	172	141	31
Cd36_02810	orf19.2992	0.0206448	0.223414	0.0924063	1.52981e-06	318	72.46	245.54	19	14	5
Cd36_02820	orf19.2994	0.0129766	0.0832396	0.155895	0.000233815	606	139.618	466.382	17	11	6
Cd36_02840	orf19.2995	0.0747975	0.297186	0.251686	6.03468e-09	753	163.019	589.981	82	40	42
Cd36_02850	orf19.2996	0.0615267	0.536347	0.114714	1.24644e-91	3132	694.239	2437.76	410	266	144
Cd36_02860	orf19.2998	0.0373617	0.406359	0.0919425	9.75006e-17	615	121.123	493.877	56	38	18
Cd36_02870	orf19.3000	0.0806683	0.544535	0.148142	7.38569e-61	2415	525.654	1889.35	348	203.5	144.5
Cd36_02880	orf19.3001	0.00633107	0.328213	0.0192895	2.56285e-21	600	124.144	475.856	36	33	3
Cd36_02890	orf19.3002	NA	0.0614571	0	NA	768	169.473	598.527	10	10	NA
Cd36_02900	orf19.3003	0.0162489	0.434896	0.0373627	6.56942e-163	4251	922.676	3328.32	358	304.5	53.5
Cd36_02920	orf19.3004	0.0470103	0.484908	0.0969469	8.26308e-37	1230	253.423	976.577	135	90.5	44.5
Cd36_02930	orf19.3006	0.0156677	0.400291	0.0391408	5.06191e-63	1752	376.118	1375.88	138	116.667	21.3333
Cd36_02940	orf19.3007	0.0867854	0.585071	0.148333	1.12456e-13	471	93.7486	377.251	69	38.0833	30.9167
Cd36_02960	orf19.3008	0.0212346	0.521838	0.0406918	5.22764e-42	969	204.794	764.206	93	77	16
Cd36_02970	orf19.3009	0.0833995	0.479436	0.173953	4.96789e-41	1956	427.214	1528.79	272	151.333	120.667
Cd36_02980	orf19.3010	0.0526031	0.304648	0.172669	5.22244e-14	861	191.719	669.281	82	48	34
Cd36_02990	orf19.4255	0.706141	1.10419	0.639512	0.000330835	1230	284.774	945.226	597	164.583	432.417
Cd36_03000	orf19.3012	0.06007	0.489511	0.122714	4.23792e-85	3165	716.708	2448.29	399	257.667	141.333
Cd36_03010	orf19.3013	NA	0.321902	0	NA	1191	248.349	942.651	65	65	NA
Cd36_03020	orf19.3014	0.00162963	0.1286	0.0126721	1.57615e-13	792	177.697	614.303	22	21	1
Cd36_03030	orf19.3015	0.0208679	0.374316	0.0557495	3.51339e-53	1692	380.065	1311.94	139	112	27
Cd36_03040	orf19.3016	0.00902557	0.450331	0.0200421	1.60808e-19	423	88.6072	334.393	33	30	3
Cd36_03050	orf19.3018	0.08658	0.567146	0.152659	1.95218e-30	1218	241.678	976.322	176	96.1667	79.8333
Cd36_03060	orf19.3019	0.0406466	0.546543	0.0743704	2.36118e-74	2019	439.312	1579.69	233	170.5	62.5
Cd36_03070	orf19.3021	0.0818866	0.522102	0.15684	1.15881e-27	1128	242.831	885.169	160	91.3333	68.6667
Cd36_03080	orf19.3022	0.0257335	0.452435	0.0568778	5.63262e-34	930	198.69	731.31	86	67.5	18.5
Cd36_03090	orf19.3023	0.0263312	0.517951	0.0508373	6.93377e-76	1881	405.924	1475.08	190	151.833	38.1667
Cd36_03100	orf19.3026	0.0168438	0.409093	0.0411735	5.02769e-52	1401	320.312	1080.69	119	101	18
Cd36_03110	orf19.3027	0.00890807	0.449754	0.0198065	9.63873e-50	1134	230.594	903.406	86	78	8
Cd36_03120	orf19.3029	0.0162644	0.433321	0.0375344	4.6527e-58	1506	325.094	1180.91	126	107	19
Cd36_03130	orf19.3030	0.0444418	0.468944	0.0947699	1.77359e-46	1587	335.573	1251.43	171	117	54
Cd36_03140	orf19.3031	0.00731234	0.43187	0.0169318	1.00305e-39	879	191.886	687.114	68	63	5
Cd36_03150	orf19.3034	0.00621747	0.413055	0.0150524	1.02697e-81	1866	412.459	1453.54	140	131	9
Cd36_03160	orf19.3035	0.0206511	0.459023	0.0449894	1.93483e-156	4218	879.663	3338.34	370	302	68
Cd36_03170	orf19.3037	0.0102126	0.237922	0.0429242	8.15234e-43	1881	402.203	1478.8	97	82	15
Cd36_03180	orf19.3038	0.0167402	0.396154	0.0422569	4.37758e-93	2664	580.01	2083.99	213	178.5	34.5
Cd36_03190	orf19.3040	0.0182136	0.437186	0.0416609	2.17694e-48	1275	274.677	1000.32	109	91	18
Cd36_03200	orf19.3041	0.0225853	0.482345	0.0468239	4.20622e-76	1947	418.815	1528.18	183	149	34
Cd36_03210	orf19.3042	0.113052	0.487859	0.23173	1.49737e-13	822	164.504	657.496	128	59	69
Cd36_03220	orf19.3043	0.0338701	0.595653	0.0568621	9.79013e-46	1053	222.604	830.396	119	91.5	27.5
Cd36_03230	orf19.3045	0.0596375	0.441562	0.13506	3.21793e-34	1434	317.618	1116.38	170	106	64
Cd36_03240	orf19.3047	0.0282958	0.477444	0.0592653	4.99369e-126	3573	746.078	2826.92	342	263.5	78.5
Cd36_03250	orf19.3048	0.061975	0.471186	0.13153	9.84101e-73	2952	648.838	2303.16	364	227	137
Cd36_03260	orf19.3049	0.0366562	0.426374	0.085972	2.0486e-41	1407	302.873	1104.13	138	98.5	39.5
Cd36_03270	orf19.3050	0.0205075	0.415549	0.0493504	2.33919e-96	2874	591.874	2282.13	235	188.833	46.1667
Cd36_03280	orf19.3051	0.0207673	0.430216	0.0482717	1.33216e-32	879	195.486	683.514	78	64	14
Cd36_03290	orf19.3052	0.00620879	0.261664	0.0237281	3.08121e-18	621	135.811	485.189	33	30	3
Cd36_03300	orf19.3053	0.0191866	0.301971	0.0635379	1.20821e-14	543	120.686	422.314	38	30	8
Cd36_03310	orf19.3054	0.0250617	0.388041	0.0645853	1.98945e-43	1443	306.988	1136.01	121	93	28
Cd36_03320	orf19.3055	0.0240929	0.488616	0.0493083	3.14158e-64	1695	345.358	1349.64	156	124	32
Cd36_03330	orf19.3057	0.0191942	0.494372	0.0388254	4.21561e-18	405	88.3887	316.611	38	32	6
Cd36_03340	orf19.3058	0.0163193	0.48462	0.0336744	3.04538e-63	1440	324.967	1115.03	134	116	18
Cd36_03350	orf19.3059	0.0037666	0.375613	0.0100279	1.41217e-44	1032	233.523	798.477	72	69	3
Cd36_03360	orf19.3060	0.0301075	0.398424	0.0755666	6.67747e-25	825	181.177	643.823	75	56	19
Cd36_03370	orf19.3061	0.00704901	0.495119	0.014237	1.12437e-28	549	121.405	427.595	47	44	3
Cd36_03380	orf19.6265	0.00660368	0.982977	0.00671805	2.82245e-34	390	85.8035	304.197	49	47	2
Cd36_03390	orf19.3062	0.0682857	0.467477	0.146073	7.88505e-80	3525	756.983	2768.02	444	263.333	180.667
Cd36_03400	orf19.3063	0.0539923	0.36133	0.149427	2.69468e-15	711	157.521	553.479	74	45.1667	28.8333
Cd36_03410	orf19.3064	0.0230957	0.439257	0.052579	9.10426e-19	504	108.286	395.714	45	36	9
Cd36_03430	orf19.3066	0.0532544	0.402758	0.132224	1.01789e-77	3429	786.722	2642.28	381	245.167	135.833
Cd36_03440	orf19.71	0.0347773	0.450168	0.077254	3.14833e-35	1050	240.78	809.22	109	81.5	27.5
Cd36_03450	orf19.1133	0.0615082	0.4456	0.138035	9.79751e-88	3783	843.579	2939.42	457	283.417	173.583
Cd36_03460	orf19.1037	0.0470392	0.475498	0.0989262	1.89701e-50	1770	366.321	1403.68	193	129	64
Cd36_03480	orf19.1035	0.0472009	0.52707	0.0895533	6.0177e-95	2838	637.457	2200.54	342	241.333	100.667
Cd36_03490	orf19.1034	0.0271319	0.345346	0.0785646	1.6264e-15	549	117.432	431.568	44	32.5	11.5
Cd36_03510	orf19.1032	0.0638468	0.398988	0.160022	1.28933e-33	1659	384.589	1274.41	197	119	78
Cd36_03520	orf19.1031	0.0171344	0.297963	0.057505	1.54107e-83	3192	742.194	2449.81	224	182.5	41.5
Cd36_03530	orf19.1030	0.0428533	0.261249	0.164032	5.64627e-18	1257	260.651	996.349	99	57.5	41.5
Cd36_03540	orf19.1029	0.0622784	0.317165	0.196359	3.94491e-14	927	199.122	727.878	95	51.5	43.5
Cd36_03550	orf19.1028	0.119759	0.355832	0.336561	1.23001e-10	1113	247.947	865.053	166	70.25	95.75
Cd36_03560	orf19.1027	0.0475166	0.313218	0.151705	3.18769e-19	1107	238.242	868.758	101	61	40
Cd36_03570	orf19.1026	0.0901426	0.460797	0.195623	2.07579e-18	942	212.04	729.96	135	73	62
Cd36_03590	orf19.4457	0.0910411	0.349377	0.260581	3.31621e-52	4755	1019.54	3735.46	605	284.75	320.25
Cd36_03600	orf19.4459	0.0948449	0.380749	0.249101	3.41925e-21	1680	345.25	1334.75	222	103.083	118.917
Cd36_03630	orf19.4464	0.143101	0.326588	0.438171	0.00113304	501	109.529	391.471	80	29	51
Cd36_03640	orf19.4465	0.108042	0.294387	0.367008	1.30917e-12	1989	398.042	1590.96	257	96.9167	160.083
Cd36_03650	orf19.4466	0.0835802	0.333253	0.250801	1.67949e-13	1143	229.5	913.5	134	61.75	72.25
Cd36_03660	orf19.4467	0.0531387	0.315009	0.168689	1.02353e-23	1491	313.285	1177.72	141	80.5833	60.4167
Cd36_03670	orf19.4468	0.0766059	0.197696	0.387494	0.0012478	504	121.797	382.203	49	21.1667	27.8333
Cd36_03680	orf19.4470	0.15761	0.387828	0.406392	0.000599285	480	91.9149	388.085	83	27.8333	55.1667
Cd36_03690	orf19.4471	0.129583	0.376885	0.343827	1.45879e-20	2484	515.622	1968.38	387	152.75	234.25
Cd36_03700	orf19.4473	0.0415284	0.428257	0.0969708	1.01291e-14	525	104.204	420.796	51	34	17
Cd36_03710	orf19.4474	0.098599	0.290208	0.339753	2.62615e-07	903	185.952	717.048	111	44.75	66.25
Cd36_03720	orf19.4475	0.044648	0.327411	0.136367	6.0031e-26	1440	286.466	1153.53	126	76	50
Cd36_03760	orf19.4476	0.0280445	0.538936	0.0520368	6.83055e-43	1032	214.61	817.39	105	82.5	22.5
Cd36_03770	orf19.4477	0.0359416	0.904545	0.0397344	1.60768e-61	1011	213.143	797.857	140	112	28
Cd36_03780	orf19.1048	0.0745679	1.60929	0.0463358	3.276e-73	1032	216.052	815.948	201	143.083	57.9167
Cd36_03790	orf19.4478	0.0398778	0.42041	0.0948545	4.74948e-56	2049	439.677	1609.32	204	141.5	62.5
Cd36_03800	orf19.4479	0.0346116	0.392705	0.0881363	6.88844e-56	2130	444.859	1685.14	193	136	57
Cd36_03810	orf19.4481	0.0618567	0.440384	0.140461	9.61769e-12	429	100.576	328.424	53	33.5	19.5
Cd36_03820	orf19.4482	0.103679	0.489124	0.211969	1.18422e-30	1761	359.947	1401.05	265	129.333	135.667
Cd36_03830	orf19.1039	0.110862	0.279784	0.396241	2.25022e-06	1089	205.189	883.811	139	47.9167	91.0833
Cd36_03840	orf19.1040	0.101373	0.285606	0.354942	2.65474e-05	642	134.025	507.975	80	31.8333	48.1667
Cd36_03850	orf19.1041	0.0713661	0.298778	0.23886	2.01028e-12	1083	208.976	874.024	111	51.5	59.5
Cd36_03860	orf19.1042	0.00155744	0.359108	0.00433696	5.10393e-38	846	203.252	642.748	59	58	1
Cd36_03870	orf19.1043	0.0798065	0.354119	0.225367	4.03933e-12	864	177.142	686.858	102	50	52
Cd36_03880	orf19.1045	0.136934	0.464773	0.294626	1.22882e-08	714	129.419	584.581	118	44.8333	73.1667
Cd36_03890	orf19.1047	0.078947	0.309296	0.255248	9.11384e-23	2187	448.802	1738.2	244	113.75	130.25
Cd36_03900	orf19.1048	0.0772704	0.702872	0.109935	3.6024e-36	1032	214.82	817.18	158	98	60
Cd36_03910	orf19.1049	0.04476	0.322309	0.138873	1.09521e-11	570	115.461	454.539	50	30.25	19.75
Cd36_03920	orf19.1050	0.0635289	0.504696	0.125876	1.82571e-22	846	164.697	681.303	102	60.5	41.5
Cd36_03930	orf19.1051	NA	0.149107	0	NA	393	96.1394	296.861	13	13	NA
Cd36_03940	orf19.1052	0.00337541	0.195257	0.017287	5.22722e-10	390	93.0721	296.928	17	16	1
Cd36_03950	orf19.1053	0.0749037	0.317364	0.236019	2.05027e-14	1149	251.193	897.807	129	65	64
Cd36_03960	orf19.1054	0.0569335	0.225076	0.252953	9.17115e-08	795	174.859	620.141	68	34	34
Cd36_03970	orf19.1055	0.00394872	0.254954	0.015488	4.68231e-37	1284	268.345	1015.65	62	58	4
Cd36_03980	orf19.1057	0.0758983	0.29096	0.260855	6.81768e-07	558	128.544	429.456	62	31	31
Cd36_03990	orf19.1058	0.0316899	0.39615	0.0799947	7.03174e-24	828	167.343	660.657	72	51.5	20.5
Cd36_04000	orf19.1059	NA	0.141972	0	NA	315	77.3134	237.687	10	10	NA
Cd36_04010	orf19.1061	NA	0.163179	0	NA	408	95.4671	312.533	14	14	NA
Cd36_04020	orf19.1062	0.0598286	0.405056	0.147704	1.30569e-25	1233	254.815	978.185	136	79.75	56.25
Cd36_04030	orf19.1063	0.0847233	0.33486	0.253011	8.16795e-14	1182	243.743	938.257	141	65.8333	75.1667
Cd36_04040	orf19.1064	0.0188672	0.361678	0.0521658	7.35691e-63	2013	456.526	1556.47	160	131	29
Cd36_04050	orf19.1065	0.00201034	0.169895	0.0118328	4.04925e-41	1935	440.712	1494.29	70	67	3
Cd36_04060	orf19.1066	0.0417361	0.408004	0.102293	3.41556e-19	762	146.177	615.823	71	46	25
Cd36_04070	orf19.1067	0.0129441	0.241883	0.053514	2.06147e-17	783	159.61	623.39	41	33	8
Cd36_04080	orf19.1069	0.0377701	0.459183	0.082255	8.16821e-49	1590	327.606	1262.39	159	112.5	46.5
Cd36_04090	orf19.1070	0.0351325	0.27708	0.126796	2.05234e-17	948	205.043	742.957	73	47.5	25.5
Cd36_04100	orf19.5203	0.0966045	0.329215	0.293439	1.49019e-22	2310	515.386	1794.61	300	137.333	162.667
Cd36_04120	orf19.5201	0.0286815	0.298099	0.0962149	3.53119e-13	588	126.025	461.975	44	31	13
Cd36_04130	orf19.5200	0.00134467	0.363992	0.00369425	7.71464e-41	942	197.659	744.341	58	57	1
Cd36_04140	orf19.5198	0.0416456	0.419464	0.099283	1.78875e-58	2211	464.538	1746.46	220	149.25	70.75
Cd36_04150	orf19.5197	0.0219631	0.362279	0.0606248	1.70978e-83	2862	621.258	2240.74	227	178.5	48.5
Cd36_04160	orf19.5196	0.0120836	0.473844	0.0255011	1.79258e-24	531	113.872	417.128	45	40	5
Cd36_04170	orf19.5195	0.0219251	0.479638	0.0457117	2.01228e-34	837	189.084	647.916	81	67	14
Cd36_04180	orf19.6837	0.175384	1.74306	0.100619	1.51326e-38	759	175.511	583.489	210	118.75	91.25
Cd36_04190	orf19.6837	0.018117	0.325262	0.0556998	6.93018e-23	759	172.406	586.594	56	45.5	10.5
Cd36_04200	orf19.6838	0.00649217	0.280171	0.0231722	1.81663e-25	807	188.203	618.797	48	44	4
Cd36_04210	orf19.6840	0.188047	0.293674	0.640324	0.0540156	519	113.168	405.832	95	27.5	67.5
Cd36_04220	orf19.6842	0.0314783	0.560426	0.0561685	4.03137e-173	4191	922.749	3268.25	465	364.25	100.75
Cd36_04230	orf19.6843	0.0425789	0.534012	0.079734	4.19912e-38	1119	225.125	893.875	123	86	37
Cd36_04240	orf19.6844	0.00466915	0.251	0.0186022	1.6829e-46	1650	360.965	1289.04	83	77	6
Cd36_04250	orf19.6845	0.0920313	0.547859	0.167984	1.71711e-33	1431	301.4	1129.6	215	117.167	97.8333
Cd36_04260	orf19.6846	0.00723019	0.443401	0.0163062	4.81587e-45	969	204.628	764.372	74	68.5	5.5
Cd36_04270	orf19.6847	0.0798558	0.627304	0.1273	1.94655e-47	1554	332.901	1221.1	234	141.5	92.5
Cd36_04280	orf19.6848	0.0426692	0.571531	0.0746577	2.8752e-103	2838	583.8	2254.2	327	233.5	93.5
Cd36_04290	orf19.6849	0.0128949	0.635298	0.0202975	3.41144e-18	300	65.3448	234.655	31	28	3
Cd36_04300	orf19.6850	0.0479433	0.614146	0.078065	1.2234e-64	1731	352.969	1378.03	212	148	64
Cd36_04310	orf19.6851	0.0529263	0.414167	0.12779	1.32164e-32	1383	296.938	1086.06	150	94.5	55.5
Cd36_04330	orf19.6852	0.05842	0.61267	0.0953532	4.73136e-30	825	175.565	649.435	110	73.5	36.5
Cd36_04350	orf19.6853	0.0671261	0.517341	0.129752	2.0471e-27	1011	216.729	794.271	132	81	51
Cd36_04360	orf19.6854	0.00242185	0.108116	0.0224004	3.0755e-22	1638	397.279	1240.72	43	40	3
Cd36_04370	orf19.6855	0.0659795	0.35721	0.184708	4.32084e-28	1722	363.029	1358.97	189	103.167	85.8333
Cd36_04380	orf19.783	0.0115332	0.411155	0.0280507	1.8217e-139	3489	780.384	2708.62	278	247	31
Cd36_04390	orf19.782	0.0272369	0.610418	0.0446201	2.35514e-93	1959	426.192	1532.81	219	178	41
Cd36_04400	orf19.781	0.00601174	0.411804	0.0145986	4.19347e-97	2175	504.914	1670.09	170	160	10
Cd36_04410	orf19.780	0.0107079	0.368454	0.0290617	2.79134e-197	5439	1237.77	4201.23	405	360.333	44.6667
Cd36_04420	orf19.779	0.0293535	0.459255	0.0639154	6.20855e-42	1239	248.952	990.048	114	85.5	28.5
Cd36_04430	orf19.778	0.00277185	0.211062	0.0131329	9.52612e-24	924	201.126	722.874	39	37	2
Cd36_04440	orf19.776	0.166733	0.580145	0.2874	1.1892e-26	1899	401.233	1497.77	386	162.083	223.917
Cd36_04450	orf19.775	0.0726796	0.457364	0.15891	3.5075e-56	2706	562.187	2143.81	341	192.5	148.5
Cd36_04460	orf19.773	0.0693329	0.426116	0.162709	3.27579e-12	585	116.897	468.103	69	38	31
Cd36_04470	orf19.772	0.00703591	0.363081	0.0193783	3.1886e-49	1281	281.431	999.569	88	81	7
Cd36_04500	orf19.769	0.0349791	0.396193	0.088288	1.09138e-33	1167	259.929	907.071	111	80	31
Cd36_04510	orf19.768	0.0372964	0.53219	0.0700809	2.87415e-107	2955	627.983	2327.02	324	239.333	84.6667
Cd36_04540	orf19.763	0.020252	0.394167	0.0513792	2.98603e-24	672	159.012	512.988	59	48.75	10.25
Cd36_04550	orf19.762	0.0120343	0.516906	0.0232814	2.83551e-99	2109	433.712	1675.29	182	162	20
Cd36_04560	orf19.761	0.0407509	0.596904	0.0682705	5.48325e-87	2106	479.824	1626.18	262	197.5	64.5
Cd36_04570	orf19.760	0.130005	0.563728	0.230616	8.14511e-08	366	76.961	289.039	65	30.5	34.5
Cd36_04580	orf19.759	0.0110101	0.417432	0.0263757	2.99089e-112	2805	609.139	2195.86	219	195	24
Cd36_04590	orf19.758	0.0141577	0.287315	0.0492759	9.38948e-11	369	83.7927	285.207	24	20	4
Cd36_04600	orf19.757	0.0368202	0.578086	0.0636933	1.24577e-100	2550	532.243	2017.76	287	214.5	72.5
Cd36_04610	orf19.756	0.0413919	0.379666	0.109022	1.29273e-41	1686	388.523	1297.48	168	115.75	52.25
Cd36_04620	orf19.755	0.0266665	0.393841	0.0677088	4.02814e-11	339	71.8045	267.196	29	22	7
Cd36_04630	orf19.754	0.0118932	0.27569	0.0431397	3.62503e-31	1188	255.746	932.254	70	59	11
Cd36_04640	orf19.753	0.0484463	0.630366	0.0768542	1.8278e-86	2262	460.862	1801.14	281	196.5	84.5
Cd36_04650	orf19.752	0.0449664	0.62594	0.0718382	2.16706e-38	954	197.899	756.101	117	84	33
Cd36_04660	orf19.751	0.0799839	0.52188	0.153261	3.65861e-18	699	146.495	552.505	97	55.0833	41.9167
Cd36_04670	orf19.750	0.109749	0.523762	0.20954	4.1801e-12	528	131.319	396.681	90	49.5	40.5
Cd36_04680	orf19.48	0.0913361	0.584024	0.156391	1.3377e-94	3972	805.098	3166.9	599	326.667	272.333
Cd36_04690	orf19.50	0.0669438	0.743632	0.0900228	4.85357e-75	1938	392.167	1545.83	284	185	99
Cd36_04700	orf19.51	0.0621406	0.474698	0.130906	1.08056e-95	3945	834.459	3110.54	479	293.5	185.5
Cd36_04710	orf19.52	0.0436705	0.399556	0.109298	7.08313e-38	1494	338.978	1155.02	154	105	49
Cd36_04720	orf19.53	0.188267	0.613322	0.306962	3.3542e-14	1077	216.62	860.38	234	90.75	143.25
Cd36_04730	orf19.54	0.0619121	0.474471	0.130487	8.58648e-48	1944	398.649	1545.35	232	140.167	91.8333
Cd36_04740	orf19.55	0.0211787	0.361232	0.0586293	5.20895e-29	972	205.809	766.191	75	59	16
Cd36_04750	orf19.56	0.0187873	0.419604	0.0447738	3.09949e-62	1740	365.626	1374.37	143	117.5	25.5
Cd36_04760	orf19.57	0.0244847	0.346263	0.0707113	8.72375e-18	609	131.61	477.39	48	36.5	11.5
Cd36_04770	orf19.58	0.0485628	0.557983	0.0870328	2.53974e-79	2328	492.058	1835.94	280	193.667	86.3333
Cd36_04780	orf19.59	0.0394963	0.45395	0.0870058	5.13395e-32	1101	217.293	883.707	108	74	34
Cd36_04790	orf19.4064	0.0437898	0.504066	0.0868733	3.93748e-86	2643	578.081	2064.92	300	212.167	87.8333
Cd36_04840	orf19.4063	0.0121437	0.502011	0.02419	1.07945e-82	1719	390.744	1328.26	159	143	16
Cd36_04850	orf19.4062	0.138569	0.553192	0.250489	4.19149e-18	1110	228.724	881.276	201	89.5	111.5
Cd36_04860	orf19.4061	0.044371	0.425202	0.104353	7.61162e-22	783	167.923	615.077	81	54.5	26.5
Cd36_04870	orf19.4060	0.00933266	0.275186	0.033914	2.87787e-31	1110	247.451	862.549	65	57	8
Cd36_04880	orf19.4059	0.0309582	0.432957	0.0715041	1.25969e-41	1278	288.815	989.185	125	95	30
Cd36_04890	orf19.4056	0.0775022	0.474908	0.163194	7.10314e-30	1263	305.54	957.46	178	107.5	70.5
Cd36_04900	orf19.449	0.017872	0.505402	0.0353618	1.52793e-53	1194	259.722	934.278	112	95.5	16.5
Cd36_04910	orf19.448	0.048643	0.457805	0.106253	4.34011e-35	1236	269.953	966.047	138	92.5	45.5
Cd36_04920	orf19.446.2	0.00541844	0.0929028	0.0583237	0.00573921	231	45.7774	185.223	5	4	1
Cd36_04930	orf19.446.1	0.00539934	0.218985	0.0246562	5.80134e-06	228	42.1247	185.875	9	8	1
Cd36_04940	orf19.446	0.094947	0.277022	0.342741	6.38103e-07	882	184.93	697.07	105	42.8333	62.1667
Cd36_04950	orf19.445	0.0373277	0.463475	0.0805388	6.92884e-37	1155	248.756	906.244	119	86	33
Cd36_04960	orf19.444	0.0597267	0.454558	0.131395	3.5961e-12	435	95.3401	339.66	52	32.5	19.5
Cd36_04970	orf19.443	0.0130885	0.284259	0.0460444	6.3509e-16	585	122.571	462.429	35	29	6
Cd36_04980	orf19.441	0.0019308	0.315858	0.00611287	7.49329e-51	1332	294.827	1037.17	78	76	2
Cd36_05000	orf19.440	0.0280682	0.557964	0.0503046	1.25738e-84	1914	437.866	1476.13	213	172.333	40.6667
Cd36_05010	orf19.439	0.0193645	0.464139	0.0417215	8.55609e-28	717	141.587	575.413	60	49	11
Cd36_05020	orf19.438	0.0357026	0.424455	0.084114	3.45903e-52	1746	397.988	1348.01	176	129	47
Cd36_05030	orf19.437	0.0111907	0.335112	0.0333941	3.90045e-63	1956	425.526	1530.47	132	115	17
Cd36_05040	orf19.434	0.0264825	0.500143	0.0529498	3.71294e-80	2106	434.234	1671.77	202	158.5	43.5
Cd36_05050	orf19.433	0.0494566	0.570417	0.0867026	5.16022e-63	1740	388.873	1351.13	220	155.333	64.6667
Cd36_05060	orf19.432	0.0193941	0.386004	0.0502434	3.40638e-46	1374	303.254	1070.75	112	91.5	20.5
Cd36_05070	orf19.431	0.035892	0.54796	0.0655011	1.74514e-90	2325	513.131	1811.87	263	199.5	63.5
Cd36_05080	orf19.430	0.0439071	0.463771	0.0946742	2.52768e-21	657	145.041	511.959	72	50.1667	21.8333
Cd36_05090	orf19.429	0.0486478	0.514824	0.0944941	1.2293e-56	1809	386.605	1422.4	211	144	67
Cd36_05100	orf19.428	0.0525887	0.510852	0.102943	4.5968e-64	2175	452.13	1722.87	255	167.5	87.5
Cd36_05110	orf19.427	0.0974514	0.520023	0.187398	3.05441e-92	4656	999.338	3656.66	709	374.833	334.167
Cd36_05120	orf19.426	0.0973251	0.472364	0.206038	7.36727e-35	2049	416.567	1632.43	295	146	149
Cd36_05130	orf19.425	0.0370996	0.528059	0.0702565	6.15301e-22	591	121.347	469.653	63	46	17
Cd36_05140	orf19.424	0.0241598	0.340989	0.0708523	3.20764e-16	552	131.388	420.612	46	36	10
Cd36_05150	orf19.423	0.0302348	0.399166	0.075745	8.35384e-17	555	116.307	438.693	49	36	13
Cd36_05160	orf19.422	0.0666754	0.628728	0.106048	1.97496e-76	2202	496.084	1705.92	320	211.167	108.833
Cd36_05170	orf19.419	0.182913	0.626821	0.291811	5.06522e-24	1707	357.78	1349.22	371	152	219
Cd36_05180	orf19.418	0.0173529	0.531632	0.0326409	1.00501e-195	4275	922.96	3352.04	409	351.5	57.5
Cd36_05190	orf19.417	0.0362922	0.452131	0.0802692	1.39292e-34	1047	233.145	813.855	108	79.1667	28.8333
Cd36_05200	orf19.416	0.0334204	0.56675	0.0589685	5.34433e-46	1107	235.086	871.914	122	93.5	28.5
Cd36_05210	orf19.415	0.0266987	0.468842	0.0569461	1.05478e-28	744	172.116	571.884	75	60	15
Cd36_05220	orf19.414	0.0298019	0.38356	0.0776982	1.18173e-61	2256	476.247	1779.75	195	143	52
Cd36_05240	orf19.413	0.0328788	0.391869	0.0839024	2.18548e-57	2052	461.417	1590.58	192	140.833	51.1667
Cd36_05260	orf19.411	0.0559526	0.453985	0.123248	4.33851e-25	1005	198.196	806.804	111	67.5	43.5
Cd36_05280	orf19.2495	0.012608	0.516649	0.0244034	6.97063e-225	4713	1033.77	3679.23	432	386	46
Cd36_05290	orf19.2494	0.0331303	0.520597	0.0636391	9.83872e-56	1464	322.35	1141.65	158	121	37
Cd36_05300	orf19.2492	0.0263463	0.393802	0.0669024	2.15334e-38	1251	266.023	984.977	107	81.5	25.5
Cd36_05310	orf19.2489	0.0224964	0.366795	0.0613324	6.08773e-98	3327	732.511	2594.49	270	212.5	57.5
Cd36_05320	orf19.2488	0.00854005	0.492243	0.0173493	1.98271e-58	1197	254.894	942.106	100	92	8
Cd36_05330	orf19.2487	0.0300809	0.526861	0.0570945	4.21259e-31	756	162.49	593.51	79	61.5	17.5
Cd36_05340	orf19.2485	0.0145483	0.455894	0.0319116	1.1105e-174	4278	911.849	3366.15	360	311.5	48.5
Cd36_05350	orf19.2484	0.0417021	0.418742	0.0995889	2.25258e-33	1251	264.901	986.099	125	85	40
Cd36_05360	orf19.2483	0.0570585	0.203502	0.280383	0.000383293	423	95.3824	327.618	35	17	18
Cd36_05370	orf19.2481	0.0914547	0.470583	0.194344	8.67045e-15	741	156.399	584.601	105	54.6667	50.3333
Cd36_05390	orf19.2479	0.0165432	0.473196	0.0349606	3.57743e-72	1671	387.546	1283.45	157	136	21
Cd36_05410	orf19.2478	0.053519	0.44035	0.121537	8.47219e-29	1140	234.942	905.058	125	78.25	46.75
Cd36_05420	orf19.2476	0.0636852	0.534979	0.119042	1.06525e-135	4995	1020.52	3974.48	633	390.333	242.667
Cd36_05430	orf19.2475	0.053558	0.323269	0.165676	3.63173e-08	393	102.811	290.189	42	27	15
Cd36_05440	orf19.2474	0.0264432	0.463652	0.0570324	1.72666e-58	1632	342.668	1289.33	152	118.5	33.5
Cd36_05450	orf19.2473	0.0389855	0.594318	0.065597	9.02144e-77	1896	399.977	1496.02	221	164.167	56.8333
Cd36_05460	orf19.2472	0.0639091	0.500178	0.127773	3.85105e-19	690	147.249	542.751	87	53.75	33.25
Cd36_05470	orf19.2471	0.0680628	0.405599	0.167808	4.98346e-10	471	102.142	368.858	56	32	24
Cd36_05480	orf19.2469	0.0859836	0.600076	0.143288	1.18046e-28	990	224.758	765.242	155	92.8333	62.1667
Cd36_05500	orf19.2467	0.0244643	0.486643	0.0502715	1.95123e-41	1035	224.849	810.151	100	80.5	19.5
Cd36_05510	orf19.2465	0.0636951	0.403832	0.157727	3.94133e-24	1206	256.199	949.801	138	80	58
Cd36_05520	orf19.2463	0.0385161	0.534353	0.0720799	2.09064e-37	999	213.252	785.748	111	81.5	29.5
Cd36_05530	orf19.2462	0.0338717	0.383579	0.0883044	3.18093e-27	978	223.128	754.872	92	67	25
Cd36_05540	orf19.2461	0.029002	0.430457	0.0673749	4.47729e-32	984	210.671	773.329	91	69	22
Cd36_05550	orf19.2460	0.0402392	0.231638	0.173716	1.67738e-14	1032	247.137	784.863	80	49.25	30.75
Cd36_05560	orf19.2459	0.0926368	0.442816	0.209199	1.19774e-48	2865	648.368	2216.63	410	216.833	193.167
Cd36_05570	orf19.2458	0.0401467	0.331134	0.12124	1.70387e-31	1500	329.657	1170.34	134	88.25	45.75
Cd36_05580	orf19.2457	0.0862348	0.431403	0.199894	1.45689e-33	2055	399.828	1655.17	266	131.167	134.833
Cd36_05590	orf19.2455	0.0872238	0.354778	0.245854	6.90818e-40	3330	707.834	2622.17	416	200.083	215.917
Cd36_05600	orf19.2454	0.0485398	0.360033	0.13482	2.36322e-59	3009	638.553	2370.45	294	182.583	111.417
Cd36_05610	orf19.2452	0.0953212	0.331493	0.287551	7.04298e-13	1209	267.79	941.21	156	71.75	84.25
Cd36_05620	orf19.2451	0.0727284	0.256549	0.283488	1.76588e-12	1377	321.408	1055.59	143	69.8333	73.1667
Cd36_05640	orf19.2449	0.158537	0.551579	0.287424	3.9749e-24	1602	396.044	1205.96	327	154.667	172.333
Cd36_05650	orf19.2447	0.0526155	0.421716	0.124765	3.20898e-48	2073	432.978	1640.02	223	139.667	83.3333
Cd36_05660	orf19.2446	0.0456418	0.314731	0.145018	6.60262e-20	1062	230.186	831.814	96	59.1667	36.8333
Cd36_05670	orf19.2445	0.028698	0.395832	0.0725004	5.87766e-51	1644	389.08	1254.92	155	119.667	35.3333
Cd36_05680	orf19.2444	0.00828817	0.315186	0.0262961	1.42843e-30	930	202.069	727.931	58	52	6
Cd36_05690	orf19.2443	0.0353982	0.398542	0.0888193	2.50639e-55	2022	433.703	1588.3	189	134.083	54.9167
Cd36_05700	orf19.2442	0.0429875	0.373329	0.115147	1.07279e-15	690	127.513	562.487	61	37.5	23.5
Cd36_05730	orf19.2439	0.0672133	0.132845	0.505952	0.0762952	417	90.3529	326.647	32	11	21
Cd36_05740	orf19.2438	0.0926517	0.312167	0.296802	7.15639e-06	471	106.716	364.284	59	27.25	31.75
Cd36_05750	orf19.2437	0.0417259	0.250615	0.166494	3.78329e-14	1029	215.92	813.08	79	46	33
Cd36_05760	orf19.2436	0.0413754	0.41814	0.0989509	3.12185e-53	2001	429.758	1571.24	201	137.75	63.25
Cd36_05770	orf19.2435	0.0194242	0.267426	0.0726341	2.53071e-45	2094	451.224	1642.78	133	101.5	31.5
Cd36_05780	orf19.2434	0.0600251	0.236731	0.253558	3.2998e-15	1734	364.515	1369.48	153	74	79
Cd36_05790	orf19.2433	0.150769	0.438334	0.343959	2.85211e-06	585	118.245	466.755	103	39.25	63.75
Cd36_05800	orf19.2432	0.0794284	0.265414	0.299262	2.64773e-09	1056	232.255	823.745	114	51.9167	62.0833
Cd36_05810	orf19.2429	0.135195	0.352024	0.38405	2.69876e-09	1293	261.018	1031.98	201	73.3333	127.667
Cd36_05820	orf19.1828	0.0355336	0.431891	0.0822744	2.13078e-30	1020	213.199	806.801	98	70	28
Cd36_05830	orf19.1827	0.179199	0.501404	0.357394	8.07188e-13	1332	260.262	1071.74	266	95.1667	170.833
Cd36_05840	orf19.1826	0.0351284	0.375108	0.0936487	5.6996e-45	1833	376.057	1456.94	161	111	50
Cd36_05870	orf19.1823	0.020367	0.374085	0.0544449	2.60989e-83	2724	583.948	2140.05	215	172	43
Cd36_05880	orf19.1822	0.101972	0.357921	0.2849	1.4143e-25	2394	537.551	1856.45	330	153	177
Cd36_05910	orf19.177	0.139566	0.357852	0.390009	1.368e-13	1911	430.164	1480.84	311	122.417	188.583
Cd36_05920	orf19.6277	0.242181	0.483812	0.500569	4.36365e-15	3117	667.769	2449.23	745	238.083	506.917
Cd36_05930	orf19.6276	0.165891	0.442388	0.37499	1.00145e-20	2466	544.846	1921.15	468	182.083	285.917
Cd36_05940	orf19.6275	0.0781274	0.370604	0.210811	1.33603e-24	1635	342.25	1292.75	196	100.083	95.9167
Cd36_05950	orf19.6274	0.060809	0.216355	0.281061	1.78946e-05	525	118.386	406.614	46	22.25	23.75
Cd36_05960	orf19.6273	0.167489	0.651087	0.257245	5.30214e-07	321	69.5092	251.491	68	30.25	37.75
Cd36_05970	orf19.6272	0.0672846	0.216169	0.31126	7.74492e-06	750	151.753	598.247	67	28.5	38.5
Cd36_05980	orf19.6271	0.163536	0.378619	0.431926	2.67257e-12	2091	444.008	1646.99	374	132	242
Cd36_05990	orf19.6269	0.158224	0.571314	0.276947	1.20019e-32	2331	476.204	1854.8	455	190.417	264.583
Cd36_06000	orf19.6268	0.0665266	0.385228	0.172694	2.04338e-38	2094	461.667	1632.33	243	139.083	103.917
Cd36_06020	orf19.6267	0.0183171	0.492434	0.0371971	4.70509e-57	1356	278.368	1077.63	120	100.5	19.5
Cd36_06030	orf19.6266	0.137249	0.50534	0.271598	9.07128e-35	2601	543.967	2057.03	458	200	258
Cd36_06040	orf19.6265	1.37112	0.878158	1.56136	0.0700156	345	81.8148	263.185	208	42.3333	165.667
Cd36_06050	orf19.6265	NA	0.113677	0	NA	390	85.3233	304.677	9	9	NA
Cd36_06060	orf19.6264	0.980199	NA	NA	0.0152228	153	32.4971	120.503	91	25.0833	65.9167
Cd36_06070	orf19.6264	1.02663	1.79306	0.572557	0.0183531	513	115.705	397.295	301	78.8333	222.167
Cd36_06080	orf19.6264	0.0386834	0.588104	0.0657764	7.35591e-30	714	157.011	556.989	85	64	21
Cd36_06090	orf19.6263	0.0184831	0.42177	0.0438227	3.32313e-53	1392	323.928	1068.07	124	104.5	19.5
Cd36_06100	orf19.6261	0.0339866	0.5797	0.0586279	3.16063e-273	6786	1429.08	5356.92	755	577	178
Cd36_06110	orf19.6260	0.0469534	0.546262	0.0859539	3.56058e-130	3927	812.56	3114.44	457	315.25	141.75
Cd36_06120	orf19.6259	0.0325869	0.533429	0.0610895	1.19155e-40	1038	222.674	815.326	111	85	26
Cd36_06130	orf19.6257	0.00968103	0.372766	0.0259708	1.72634e-232	6309	1405.41	4903.59	460	412.833	47.1667
Cd36_06150	orf19.6255	0.0644841	0.503964	0.127954	2.19581e-34	1311	275.229	1035.77	165	101	64
Cd36_06160	orf19.6254	0.0335268	0.523872	0.0639981	1.86735e-40	1035	226.79	808.21	112	85.5	26.5
Cd36_06170	orf19.6253	0.00401091	0.0857921	0.0467515	0.000674938	324	74.0128	249.987	7	6	1
Cd36_06180	orf19.6252	0.0368015	0.452126	0.0813964	4.92468e-37	1200	253.272	946.728	120	86	34
Cd36_06190	orf19.6250	0.0276195	0.377819	0.0731025	8.99204e-31	1017	242.581	774.419	93	72	21
Cd36_06200	orf19.6249	0.0201477	0.475829	0.0423424	3.9593e-98	2409	547.789	1861.21	230	193	37
Cd36_06210	orf19.6248	0.0810224	0.504849	0.160489	7.27701e-17	699	145.611	553.389	96	53.5	42.5
Cd36_06220	orf19.6247	0.034186	0.473563	0.072189	9.95556e-86	2598	548.243	2049.76	261	192.5	68.5
Cd36_06230	orf19.6246	0.016024	0.489031	0.0327669	1.98938e-25	564	122.473	441.527	51	44	7
Cd36_06240	orf19.6245	0.0170549	0.531628	0.0320805	3.89663e-79	1698	363.672	1334.33	161	138.5	22.5
Cd36_06250	orf19.6244	0.0533068	0.452895	0.117702	7.03299e-59	2307	493.171	1813.83	261	167.667	93.3333
Cd36_06260	orf19.6243	0.0246269	0.630116	0.0390831	5.75226e-149	3048	647.09	2400.91	334	275.833	58.1667
Cd36_06270	orf19.6240	0.0422611	0.653866	0.0646327	2.09863e-67	1578	326.758	1251.24	194	142.583	51.4167
Cd36_06280	orf19.6239	0.0126802	0.418869	0.0302724	6.53664e-42	1029	233.683	795.317	85	75	10
Cd36_06290	orf19.6238	0.0368468	0.445364	0.0827339	3.19598e-38	1200	272.948	927.052	125	91.6667	33.3333
Cd36_06300	orf19.6237	0.0211345	0.390098	0.0541775	1.94168e-24	708	156.164	551.836	59	47.5	11.5
Cd36_06310	orf19.6236	0.0194689	0.354716	0.0548859	5.98136e-20	627	132.682	494.318	47	37.5	9.5
Cd36_06320	orf19.6235	0.0760638	0.475715	0.159894	3.93637e-10	384	93.6795	290.321	54	33	21
Cd36_06330	orf19.6234	0.040492	0.399116	0.101454	3.25302e-39	1503	336.03	1166.97	150	104	46
Cd36_06340	orf19.6233	0.0262682	0.398503	0.0659172	2.53097e-44	1413	308.926	1104.07	124	95.5	28.5
Cd36_06350	orf19.6232	0.0226621	0.471811	0.0480321	2.1216e-96	2451	562.077	1888.92	239	196.833	42.1667
Cd36_06360	orf19.6231	0.0186489	0.278222	0.067029	2.55123e-11	429	103.249	325.751	30	24	6
Cd36_06370	orf19.6230	0.0411693	0.312874	0.131584	7.57484e-22	1173	241.058	931.942	99	61.6667	37.3333
Cd36_06380	orf19.6229	0.00440162	0.198242	0.0222033	1.2007e-32	1455	315.719	1139.28	60	55	5
Cd36_06390	orf19.6227	0.0396676	0.432663	0.0916825	2.07525e-29	981	217.48	763.52	101	71.5	29.5
Cd36_06410	orf19.6225	0.0472001	0.442321	0.10671	5.97814e-53	1983	430.938	1552.06	215	144	71
Cd36_06420	orf19.6224	0.0527197	0.389253	0.135438	4.3964e-33	1467	337.543	1129.46	160	102.5	57.5
Cd36_06430	orf19.6222	0.0782161	0.576719	0.135623	4.94766e-67	2478	517.962	1960.04	354	208.417	145.583
Cd36_06460	orf19.6220	0.0699796	0.546705	0.128003	1.19801e-73	2691	573.181	2117.82	364	222.5	141.5
Cd36_06470	orf19.6219	0.0185104	0.534743	0.0346156	2.67032e-64	1353	313.834	1039.17	139	120	19
Cd36_06480	orf19.6217	0.0293746	0.405166	0.0725002	2.47573e-115	3744	880.092	2863.91	358	275.5	82.5
Cd36_06490	orf19.6214	0.045875	0.56295	0.0814904	1.24087e-115	3234	705.919	2528.08	392	279.5	112.5
Cd36_06510	orf19.6213	0.0186417	0.339865	0.0548504	1.72468e-26	900	193.937	706.063	66	53	13
Cd36_06520	orf19.6211	0.0148218	0.545992	0.0271465	5.2472e-81	1653	358.395	1294.61	158	139	19
Cd36_06530	orf19.6209	0.0343328	0.449179	0.0764346	7.99156e-47	1431	328.46	1102.54	148	111	37
Cd36_06540	orf19.6208	0.0188677	0.541084	0.0348701	9.26293e-106	2277	505.885	1771.12	228	195	33
Cd36_06550	orf19.6205	0.04335	0.412318	0.105137	1.85874e-24	918	193.895	724.105	92	61.5	30.5
Cd36_06560	orf19.6203	0.0340412	0.458393	0.074262	1.37802e-94	2886	642.424	2243.58	295	220.333	74.6667
Cd36_06570	orf19.6202	0.166471	0.370928	0.448795	9.22338e-07	999	243.2	755.8	184	71.1667	112.833
Cd36_06580	orf19.6200	0.098371	0.380297	0.258669	4.31031e-13	933	227.956	705.044	133	68	65
Cd36_06590	orf19.6199	0.0304216	0.466345	0.0652342	1.47251e-73	2127	455.464	1671.54	208	158.167	49.8333
Cd36_06610	orf19.6197	0.0155004	0.329763	0.0470045	6.34134e-49	1629	357.919	1271.08	115	95.5	19.5
Cd36_06620	orf19.6196	0.0960396	0.53302	0.18018	4.16701e-13	564	113.799	450.201	84	43.4167	40.5833
Cd36_06630	orf19.6195	0.0601033	0.422519	0.14225	1.07481e-47	2205	473.641	1731.36	253	153	100
Cd36_06640	orf19.6194	0.102043	0.559337	0.182436	4.46624e-21	933	194.05	738.95	147	76.5	70.5
Cd36_06650	orf19.6193	0.0430841	0.507852	0.084836	9.9834e-117	3702	764.336	2937.66	405	282	123
Cd36_06660	orf19.4456	0.0247825	0.395412	0.0626751	1.72407e-58	1821	426.272	1394.73	165	131	34
Cd36_06670	orf19.4455	0.0923091	0.447526	0.206266	2.32435e-29	1755	358.028	1396.97	242	120.667	121.333
Cd36_06680	orf19.4451	0.0239649	0.492858	0.0486242	1.43623e-123	3123	685.115	2437.88	305	247.5	57.5
Cd36_06700	orf19.4450	0.0426131	0.451547	0.0943714	2.72814e-50	1695	375.35	1319.65	182	127.333	54.6667
Cd36_06720	orf19.4449	0.0267276	0.477416	0.055984	2.82046e-29	744	172.723	571.277	76	61	15
Cd36_06730	orf19.4448	0.0434303	0.494893	0.087757	1.19872e-81	2463	575.02	1887.98	288	208.333	79.6667
Cd36_06740	orf19.4447	0.0117857	0.376426	0.0313094	3.2794e-34	897	212.862	684.138	71	63	8
Cd36_06750	orf19.4446	0.0181089	0.544548	0.0332549	6.83056e-83	1734	392.62	1341.38	176	152	24
Cd36_06760	orf19.4445	0.040415	0.550538	0.0734099	5.54188e-57	1623	314.079	1308.92	174	122.5	51.5
Cd36_06770	orf19.4444	0.012509	0.395383	0.0316378	6.22651e-35	924	198.504	725.496	70	61	9
Cd36_06780	orf19.4443	0.0279222	0.392841	0.0710778	1.52299e-16	549	111.185	437.815	46	34	12
Cd36_06790	orf19.4442	0.0478811	0.391113	0.122423	2.0091e-39	1680	375.692	1304.31	175	114.5	60.5
Cd36_06800	orf19.4441	0.0551156	0.485831	0.113446	8.0866e-49	1794	370.067	1423.93	208	132.333	75.6667
Cd36_06810	orf19.4440	0.0356974	0.490749	0.0727407	2.71704e-84	2517	523.381	1993.62	258	188.5	69.5
Cd36_06830	orf19.4438	0.0486522	0.584212	0.0832782	1.99875e-53	1518	308.007	1209.99	182	125	57
Cd36_06840	orf19.4437	0.0103854	0.506735	0.0204947	6.48354e-144	3051	627.071	2423.93	256	231	25
Cd36_06850	orf19.4436	0.0392061	0.328155	0.119475	1.15491e-11	513	107.23	405.77	44	28.5	15.5
Cd36_06870	orf19.4435	0.0354445	0.421003	0.0841905	1.56376e-110	3903	841.182	3061.82	377	271	106
Cd36_06880	orf19.4433	0.0338002	0.368558	0.0917093	3.58995e-50	1959	431.008	1527.99	176	125.5	50.5
Cd36_06890	orf19.4432	0.0457627	0.397245	0.1152	8.76377e-66	2817	598.257	2218.74	283	184.5	98.5
Cd36_06900	orf19.4430	0.0470997	0.391118	0.120423	4.04093e-36	1605	330.846	1274.15	159	100.833	58.1667
Cd36_06910	orf19.4428	0.0923654	0.648071	0.142524	1.61856e-38	1428	273.473	1154.53	219	118.667	100.333
Cd36_06920	orf19.4427	0.0165424	0.384587	0.0430135	2.27397e-17	492	94.7221	397.278	35	28.5	6.5
Cd36_06930	orf19.4426	0.0114068	0.444421	0.0256666	1.34896e-58	1389	284.804	1104.2	108	95.5	12.5
Cd36_06940	orf19.4424	0.0128363	0.220387	0.0582446	6.22265e-21	969	222.562	746.438	52	42.5	9.5
Cd36_06950	orf19.4423	0.0498678	0.507227	0.0983145	8.8271e-99	3210	708.932	2501.07	382	261.333	120.667
Cd36_06960	orf19.2799	0.0161322	0.522538	0.0308728	1.85893e-53	1149	240.476	908.524	105	90.5	14.5
Cd36_06970	orf19.2798	0.0594839	0.486717	0.122215	2.65892e-52	1956	425.91	1530.09	240	152.5	87.5
Cd36_06980	orf19.2796	0.0360101	0.462919	0.0777891	7.57566e-64	1980	429.91	1550.09	203	148.5	54.5
Cd36_06990	orf19.2795	0.0937237	0.379216	0.247151	4.57232e-13	972	192.619	779.381	126	57.3333	68.6667
Cd36_07000	orf19.2794	0.0442042	0.419093	0.105476	1.8268e-19	735	152.613	582.387	74	49	25
Cd36_07010	orf19.2792	0.0518353	0.467854	0.110794	2.17569e-78	2844	629.415	2214.58	330	219.083	110.917
Cd36_07020	orf19.2791	0.0710793	0.407381	0.174479	2.79186e-53	2808	651.398	2156.6	351	204.75	146.25
Cd36_07030	orf19.2790	0.032862	0.507325	0.0647752	5.92673e-42	1092	252.252	839.748	120	93	27
Cd36_07040	orf19.2789	0.086156	0.540216	0.159484	3.13737e-23	942	198.68	743.32	137	76.5	60.5
Cd36_07050	orf19.2788	0.0656177	0.455781	0.143967	1.78627e-27	1206	248.376	957.624	145	84.8333	60.1667
Cd36_07060	orf19.2787	0.0690384	0.36129	0.191089	6.58658e-21	1191	296.467	894.533	144	85	59
Cd36_07070	orf19.2786	0.0326258	0.323533	0.100842	1.20048e-66	3093	668.151	2424.85	253	175.583	77.4167
Cd36_07080	orf19.2785	0.0123345	0.12454	0.0990401	4.19799e-06	522	113.29	408.71	18	13	5
Cd36_07090	orf19.2784	0.157092	0.401471	0.391291	3.27647e-07	912	181.744	730.256	160	56.5	103.5
Cd36_07100	orf19.2783	0.0777946	0.270564	0.287527	1.76028e-10	1206	240.678	965.322	126	54.6667	71.3333
Cd36_07110	orf19.2782	0.0932639	0.366175	0.254698	1.94621e-07	513	113.904	399.096	68	33	35
Cd36_07120	orf19.2781	0.173039	0.398826	0.433871	6.60205e-14	2415	483.309	1931.69	448	149.5	298.5
Cd36_07130	orf19.2778	0.0859771	0.335919	0.255946	6.86108e-24	2181	437.026	1743.97	260	118.333	141.667
Cd36_07140	orf19.1227	0.203643	0.407836	0.499326	0.00191004	561	117.084	443.916	116	36.8333	79.1667
Cd36_07150	orf19.1228	0.259651	0.470544	0.551812	0.000147697	1017	198.371	818.629	249	69.3333	179.667
Cd36_07220	orf19.1232	0.0356259	0.322862	0.110344	4.57117e-24	1110	247.757	862.243	95	65	30
Cd36_07230	orf19.1233	0.0154539	0.186731	0.0827602	2.56281e-24	1587	344.827	1242.17	76	57	19
Cd36_07300	orf19.4713	0.102298	0.427233	0.239443	9.44016e-36	2574	529.62	2044.38	368	172.5	195.5
Cd36_07310	orf19.5049	0.0332877	0.461472	0.0721337	3.76767e-30	906	184.251	721.749	87	63.5	23.5
Cd36_07320	orf19.5050	0.0217635	0.488838	0.0445209	7.9057e-86	2082	465.897	1616.1	202	167.333	34.6667
Cd36_07330	orf19.5051	0.0975852	0.481605	0.202625	4.55479e-41	2232	487.981	1744.02	333	173.417	159.583
Cd36_07340	orf19.5052	0.0179707	0.471949	0.0380775	7.50689e-50	1158	256.95	901.05	106	90	16
Cd36_07350	orf19.5053	0.0462327	0.347343	0.133104	1.79885e-16	777	163.661	613.339	73	45.5	27.5
Cd36_07360	orf19.5054	0.00720365	0.36869	0.0195385	1.0727e-35	900	202.569	697.431	64	59	5
Cd36_07370	orf19.5056	0.0439737	0.52205	0.0842327	2.13363e-46	1398	285.833	1112.17	155	107.5	47.5
Cd36_07380	orf19.5057	0.200283	0.578125	0.346436	3.52411e-13	1176	247.707	928.293	263	99.8333	163.167
Cd36_07390	orf19.5058	0.0619527	0.440285	0.14071	1.72655e-40	1797	384.355	1412.64	212	128	84
Cd36_07400	orf19.5059	0.0378099	0.429282	0.0880772	2.11594e-55	2007	406.899	1600.1	192	133	59
Cd36_07420	orf19.5061	0.0124817	0.271999	0.0458886	1.29237e-61	2406	547.92	1858.08	148	125	23
Cd36_07430	orf19.5063	0.0326898	0.250601	0.130446	3.57598e-10	573	119.7	453.3	40	25.5	14.5
Cd36_07440	orf19.5064	0.0461922	0.254699	0.18136	2.53222e-16	1212	267.027	944.973	100	57.6667	42.3333
Cd36_07460	orf19.5065	0.0590576	0.352512	0.167534	1.69305e-23	1362	279.105	1082.89	140	78.5	61.5
Cd36_07470	orf19.5066	0.040502	0.309879	0.130702	5.76381e-15	777	155.611	621.389	64	39.5	24.5
Cd36_07480	orf19.5067	0.167281	0.315061	0.530948	0.0039189	654	129.897	524.103	112	33.4167	78.5833
Cd36_07490	orf19.5068	0.0307641	0.386316	0.0796345	3.10087e-97	3615	761.807	2853.19	316	230	86
Cd36_07500	orf19.5069	0.0841651	0.363175	0.231748	6.82036e-11	717	158.056	558.944	90	45.5	44.5
Cd36_07510	orf19.5070	0.0793783	0.310659	0.255516	1.67623e-15	1293	305.021	987.979	152	77.5833	74.4167
Cd36_07520	orf19.5071	0.052287	0.483697	0.108099	2.12173e-63	2256	480.632	1775.37	261	171.333	89.6667
Cd36_07530	orf19.5073	0.00716584	0.323256	0.0221677	5.1333e-25	717	156.125	560.875	45	41	4
Cd36_07540	orf19.5074	0.0392995	0.617483	0.0636447	6.26068e-78	1869	393.328	1475.67	222	165.5	56.5
Cd36_07550	orf19.5076	0.00341809	0.217419	0.0157213	1.72594e-10	378	84.7721	293.228	17	16	1
Cd36_07560	orf19.5077	0.0235402	0.482218	0.0488164	1.81449e-20	498	109.643	388.357	48	39	9
Cd36_07570	orf19.5078	0.0159452	0.338595	0.0470923	3.88478e-13	405	88.081	316.919	29	24	5
Cd36_07600	orf19.5081	0.0220214	0.334053	0.0659218	4.8185e-81	3039	665.861	2373.14	231	179.5	51.5
Cd36_07620	orf19.5083	0.00469336	0.308534	0.0152118	7.22562e-39	1104	249.063	854.937	67	63	4
Cd36_07640	orf19.5085	0.0191307	0.481433	0.039737	4.78521e-135	3273	731.806	2541.19	308	260	48
Cd36_07650	orf19.5087	0.0178083	0.576726	0.0308783	1.15303e-103	2073	453.55	1619.45	211	182.5	28.5
Cd36_07660	orf19.5089	0.0792778	0.617772	0.128329	3.50206e-77	2601	565.066	2035.93	391	237.833	153.167
Cd36_07670	orf19.5090	0.0629111	0.5465	0.115116	8.76305e-30	978	207.428	770.572	127	80.5	46.5
Cd36_07680	orf19.5092	0.164865	0.460861	0.357733	2.95594e-06	594	127.792	466.208	113	44	69
Cd36_07690	orf19.5093	0.0287018	0.430162	0.0667232	1.14524e-34	1056	221.47	834.53	96	72.5	23.5
Cd36_07700	orf19.5094	0.0401098	0.503358	0.0796844	3.09399e-73	2214	468.648	1745.35	240	171.833	68.1667
Cd36_07710	orf19.5095	0.0424505	0.495769	0.0856254	5.64921e-126	3948	858.697	3089.3	439	311.5	127.5
Cd36_07720	orf19.5097	0.0415695	0.698252	0.0595337	2.19185e-145	3162	676.744	2485.26	408	307.5	100.5
Cd36_07730	orf19.5098	0.0603482	0.587943	0.102643	4.68543e-33	960	209.794	750.206	129	85.5	43.5
Cd36_07740	orf19.5100	0.0251106	0.461662	0.0543916	3.04515e-175	4818	1065.53	3752.47	460	367.333	92.6667
Cd36_07760	orf19.5102	0.0271204	0.519514	0.0522034	2.3215e-93	2262	516.238	1745.76	240	193.5	46.5
Cd36_07770	orf19.5103	0.04625	0.648287	0.0713418	3.2222e-41	990	209.669	780.331	126	91	35
Cd36_07780	orf19.5104	0.0125623	0.266196	0.0471919	6.06907e-13	504	102.641	401.359	28	23	5
Cd36_07790	orf19.5105	0.0497534	0.504003	0.0987165	2.5149e-101	3357	725.73	2631.27	393	266.333	126.667
Cd36_07810	orf19.5106	0.01875	0.415307	0.0451473	3.50743e-102	2943	620.877	2322.12	241	198	43
Cd36_07820	orf19.5107	0.0311789	0.44628	0.069864	2.60217e-64	1983	416.735	1566.27	188	140.167	47.8333
Cd36_07830	orf19.5110	0.0401365	0.50044	0.0802024	2.41125e-55	1581	365.59	1215.41	181	133.5	47.5
Cd36_07840	orf19.5112	0.0129403	0.269884	0.0479477	8.97662e-52	2031	472.069	1558.93	127	107	20
Cd36_07850	orf19.5113	0.0413657	0.405791	0.101938	6.83535e-29	1044	248.884	795.116	110	78	32
Cd36_07860	orf19.5114	0.0108639	0.470571	0.0230867	5.3356e-22	471	100.135	370.865	39	35	4
Cd36_07870	orf19.5117	0.0231078	0.374582	0.0616895	9.39355e-44	1458	315.416	1142.58	119	93	26
Cd36_07880	orf19.5118	0.0277523	0.476763	0.0582098	5.18811e-71	1851	437.9	1413.1	193	154.5	38.5
Cd36_07890	orf19.382	0.0018881	0.0701911	0.0268995	3.10381e-12	1374	313.402	1060.6	23	21	2
Cd36_07900	orf19.384	0.032515	0.457609	0.071054	2.09913e-56	1668	379.511	1288.49	171	130	41
Cd36_07910	orf19.385	0.0114893	0.407448	0.0281981	1.13721e-118	2997	672.789	2324.21	238	211.5	26.5
Cd36_07920	orf19.386	0.03972	0.316325	0.125567	6.8463e-19	933	209.234	723.766	82	54	28
Cd36_07930	orf19.387	0.0256485	0.521395	0.0491921	9.33792e-105	2658	536.237	2121.76	255	201.5	53.5
Cd36_07940	orf19.388	0.0160495	0.629211	0.0255073	1.25461e-52	960	204.285	755.715	99	87	12
Cd36_07950	orf19.389	0.0490463	0.385178	0.127334	6.00623e-10	369	84.6519	284.348	39	25.5	13.5
Cd36_07960	orf19.390	NA	0.150145	0	NA	573	132.284	440.716	18	18	NA
Cd36_07970	orf19.391	0.0439778	0.546062	0.0805363	4.941e-77	2127	484.263	1642.74	258	187.833	70.1667
Cd36_07980	orf19.392	0.0206908	0.40788	0.0507278	2.83069e-15	432	88.998	343.002	35	28	7
Cd36_07990	orf19.393	0.0123547	0.557427	0.0221638	2.77337e-28	525	116.953	408.047	51	46	5
Cd36_08000	orf19.394	0.0281852	0.513635	0.0548741	2.18693e-54	1383	298.488	1084.51	141	111	30
Cd36_08010	orf19.395	0.0109183	0.189068	0.0577481	5.25897e-24	1320	305.171	1014.83	62	51	11
Cd36_08020	orf19.396	0.0627693	0.346492	0.181157	8.56464e-12	633	137.548	495.452	68	38.1667	29.8333
Cd36_08030	orf19.397	0.0262637	0.336117	0.0781384	6.53399e-12	441	92.2862	348.714	34	25	9
Cd36_08040	orf19.398	0.0958644	0.463768	0.206707	3.7073e-09	444	93.9636	350.036	64	32.5	31.5
Cd36_08050	orf19.399	0.0109524	0.525502	0.0208417	1.52521e-106	2124	468.489	1655.51	195	177	18
Cd36_08060	orf19.400	0.139799	0.425372	0.328652	4.5593e-08	735	153.498	581.502	124	49.8333	74.1667
Cd36_08070	orf19.401	0.00549393	0.353448	0.0155438	3.26575e-65	1662	383.195	1278.8	115	108	7
Cd36_08080	orf19.403	0.0290587	0.366485	0.0792903	3.16829e-21	762	165.57	596.43	65	48	17
Cd36_08090	orf19.405	0.0158247	0.34928	0.0453068	1.94405e-40	1248	290.082	957.918	96	81	15
Cd36_08100	orf19.406	0.0210661	0.330887	0.0636657	9.44555e-41	1488	332.656	1155.34	113	89	24
Cd36_08110	orf19.407	0.0264839	0.43103	0.0614433	7.05797e-72	2196	466.68	1729.32	198	153	45
Cd36_08120	orf19.409	0.00995775	0.288706	0.034491	1.2094e-18	639	133.538	505.462	37	32	5
Cd36_08130	orf19.4720	0.0713051	0.486634	0.146527	5.16145e-12	480	97.7618	382.238	61	35	26
Cd36_08150	orf19.4722	0.0473056	0.689533	0.0686054	2.07174e-37	822	178.522	643.478	110	80.5	29.5
Cd36_08160	orf19.4723	0.0181428	0.412801	0.0439505	1.29122e-30	849	179.549	669.451	69	57	12
Cd36_08170	orf19.4724	0.0265214	0.460647	0.0575741	4.16623e-27	768	153.983	614.017	69	53	16
Cd36_08180	orf19.4725	0.0394577	0.561069	0.0703259	5.31488e-81	2178	452.265	1725.73	245	178.667	66.3333
Cd36_08190	orf19.4726	0.00440201	0.454632	0.00968259	3.77905e-28	573	117.328	455.672	42	40	2
Cd36_08200	orf19.4727	0.010911	0.37073	0.0294312	3.20461e-17	465	95.725	369.275	32	28	4
Cd36_08210	orf19.4728	0.0937094	0.616985	0.151883	5.0826e-107	4101	886.539	3214.46	656	372.833	283.167
Cd36_08230	orf19.4731	0.0474427	0.55523	0.085447	2.1231e-41	1173	248.551	924.449	140	97.5	42.5
Cd36_08240	orf19.4732	0.0101163	0.454255	0.0222701	2.91624e-126	2778	638.355	2139.65	239	217.5	21.5
Cd36_08250	orf19.4733	0.0294543	0.280655	0.104949	7.86543e-19	906	213.562	692.438	70	50	20
Cd36_08260	orf19.4734	0.0391213	0.416414	0.093948	2.61982e-29	1047	220.63	826.37	102	70.5	31.5
Cd36_08270	orf19.4735	0.0479071	0.54004	0.0887104	3.33644e-36	1050	231.196	818.804	127	89	38
Cd36_08280	orf19.4736	0.0253675	0.473834	0.0535367	9.83221e-63	1653	370.09	1282.91	162	130	32
Cd36_08290	orf19.4737	0.0446169	0.42333	0.105395	6.13496e-46	1689	388.47	1300.53	182	125.667	56.3333
Cd36_08300	orf19.4738	0.0428275	0.559696	0.0765193	1.16921e-61	1668	358.775	1309.23	196	141.5	54.5
Cd36_08310	orf19.4739	0.123829	0.442514	0.27983	4.06481e-25	1998	431.298	1566.7	323	144.167	178.833
Cd36_08320	orf19.4740	0.0795478	0.513973	0.15477	4.81757e-16	630	139.768	490.232	89	52	37
Cd36_08330	orf19.4741	0.119234	0.709017	0.168168	3.49819e-12	441	87.2231	353.777	79	40	39
Cd36_08340	orf19.4742	0.0559271	0.456911	0.122402	3.28042e-27	1062	217.73	844.27	120	74.5	45.5
Cd36_08350	orf19.4743	0.04138	0.57743	0.0716624	1.45184e-78	2064	432.903	1631.1	240	174.333	65.6667
Cd36_08360	orf19.4744	0.0327309	0.63169	0.0518148	2.34132e-100	2205	466.882	1738.12	255	199.333	55.6667
Cd36_08370	orf19.4746	0.0366111	0.590863	0.061962	7.40849e-67	1617	343.628	1273.37	186	140.5	45.5
Cd36_08380	orf19.4747	0.0270476	0.349493	0.0773908	5.754e-42	1593	350.795	1242.2	131	98	33
Cd36_08390	orf19.4748	0.0693908	0.498995	0.139061	2.91388e-11	393	83.6944	309.306	51	30.5	20.5
Cd36_08400	orf19.4749	0.0492526	0.38142	0.12913	2.19978e-36	1614	362.344	1251.66	168	108.333	59.6667
Cd36_08410	orf19.4750	0.0849304	0.479068	0.177283	1.03203e-40	2082	419.445	1662.55	282	148.5	133.5
Cd36_08420	orf19.4751	0.0516247	0.196516	0.2627	4.62461e-07	861	171.122	689.878	64	29.5833	34.4167
Cd36_08440	orf19.4752	0.0917057	0.471764	0.194389	2.17535e-41	2190	477.395	1712.6	315	167.167	147.833
Cd36_08450	orf19.4753	0.0482111	0.367447	0.131206	1.17351e-70	3378	759.903	2618.1	343	220.75	122.25
Cd36_08460	orf19.4754	0.0245524	0.201238	0.122007	7.28267e-21	1500	320.111	1179.89	85	56.5	28.5
Cd36_08480	orf19.4755	0.0761804	0.325091	0.234335	6.13934e-33	2775	590.407	2184.59	314	155.75	158.25
Cd36_08490	orf19.4756	0.0645062	0.321956	0.200357	8.61056e-21	1464	312.622	1151.38	153	81.8333	71.1667
Cd36_08500	orf19.4757	0.112332	0.368854	0.304542	6.58175e-18	1719	377.827	1341.17	250	110.083	139.917
Cd36_08510	orf19.4758	0.0463922	0.201765	0.229931	3.42349e-07	714	158.278	555.722	53	28	25
Cd36_08520	orf19.4759	0.0373936	0.0756357	0.494391	0.117567	495	111.193	383.807	22	8	14
Cd36_08530	orf19.4760	0.118399	0.390157	0.303466	1.32523e-12	1176	242.437	933.563	176	73.75	102.25
Cd36_08540	orf19.4761	0.135159	0.477646	0.282969	3.6983e-22	1779	361.367	1417.63	303	127.667	175.333
Cd36_08550	orf19.4763	0.0753986	0.198776	0.379315	0.000407611	624	138.4	485.6	59	24.1667	34.8333
Cd36_08560	orf19.4764	0.0456382	0.342625	0.133202	3.84844e-65	3480	718.998	2761	320	197.75	122.25
Cd36_08570	orf19.4765	0.0629319	0.210463	0.299017	3.85586e-06	630	170.289	459.711	59	31.25	27.75
Cd36_08580	orf19.4766	0.102642	0.415622	0.246961	3.20534e-41	3126	645.856	2480.14	444	206.083	237.917
Cd36_08600	orf19.4771	0.151758	0.424308	0.35766	4.19032e-17	2088	407.863	1680.14	363	132.167	230.833
Cd36_08610	orf19.4772	0.0787751	0.279467	0.281876	3.70721e-11	1137	252.172	884.828	125	58.8333	66.1667
Cd36_08630	orf19.4773	0.0355508	0.381651	0.09315	1.51483e-29	1092	242.379	849.621	102	72.5	29.5
Cd36_08640	orf19.4774	0.0478447	0.538604	0.0888309	3.68995e-39	1137	252.436	884.564	138	97	41
Cd36_08650	orf19.4775	0.0559741	0.54919	0.101921	1.86644e-70	2247	476.396	1770.6	281	185.5	95.5
Cd36_08660	orf19.4776	0.0864308	0.671505	0.128712	9.71956e-82	2622	566.139	2055.86	419	251.167	167.833
Cd36_08670	orf19.4777	0.0271121	0.460081	0.0589289	7.93755e-64	1785	395.479	1389.52	173	136	37
Cd36_08680	orf19.4778	0.041389	0.561634	0.0736939	2.01744e-77	2067	452.803	1614.2	244	179	65
Cd36_08690	orf19.4779	0.0500682	0.496435	0.100856	1.09239e-57	1860	431.926	1428.07	226	156.833	69.1667
Cd36_08700	orf19.4780	0.0255367	0.369569	0.0690985	2.12426e-41	1368	332.424	1035.58	123	97	26
Cd36_08710	orf19.4781	0.0114721	0.579531	0.0197955	2.80108e-55	1011	220.472	790.528	98	89	9
Cd36_08720	orf19.4783	0.0639732	0.666068	0.096046	1.71384e-51	1422	296.77	1125.23	200	131	69
Cd36_08730	orf19.4784	0.0203058	0.549665	0.0369422	3.41635e-165	3591	795.667	2795.33	366	310	56
Cd36_08740	orf19.4785	0.0308521	0.473684	0.0651323	1.90303e-41	1125	264.817	860.183	119	93	26
Cd36_08750	orf19.4787	0.126624	0.555905	0.227779	2.80141e-38	2166	462.307	1703.69	380	181.5	198.5
Cd36_08760	orf19.4788	0.0123781	0.421464	0.0293693	7.41101e-104	2571	575.321	1995.68	210	185.5	24.5
Cd36_08770	orf19.4789	0.0188791	0.698055	0.0270452	2.79075e-52	891	193.703	697.297	101	88	13
Cd36_08780	orf19.4791	0.0812866	0.576448	0.141013	2.46684e-74	2925	586.282	2338.72	416	235.833	180.167
Cd36_08790	orf19.4792	0.0669253	0.558641	0.1198	6.13711e-50	1671	366.847	1304.15	228	144.5	83.5
Cd36_08800	orf19.4793	0.0448383	0.206194	0.217457	3.98984e-06	576	116.487	459.513	41	21	20
Cd36_08810	orf19.4795	0.0802925	0.530292	0.151412	1.89363e-80	3483	703.177	2779.82	479	267.333	211.667
Cd36_08820	orf19.4796	0.0198448	0.41068	0.0483217	1.93454e-18	516	107.514	408.486	42	34	8
Cd36_08830	orf19.4798	0.0214014	0.524455	0.040807	3.55273e-121	2874	599.008	2274.99	274	226	48
Cd36_08840	orf19.4799	0.0920419	0.613795	0.149955	3.59553e-49	1830	398.43	1431.57	291	167	124
Cd36_08850	orf19.4800	0.0680551	0.555751	0.122456	1.25913e-66	2349	489.143	1859.86	313	192	121
Cd36_08860	orf19.4801	0.0383718	0.56615	0.0677768	1.85579e-53	1395	285.574	1109.43	155	113.5	41.5
Cd36_08870	orf19.4802	0.0235455	0.426493	0.0552072	3.35588e-44	1272	279.754	992.246	114	91	23
Cd36_08880	orf19.4804	0.0179694	0.221939	0.0809655	4.61057e-26	1398	327.93	1070.07	82	63	19
Cd36_08890	orf19.4805	0.0171191	0.523488	0.0327019	1.54313e-120	2598	589.157	2008.84	256	222	34
Cd36_08900	orf19.4807	0.0274652	0.49257	0.0557589	3.38532e-38	972	211.851	760.149	97	76.5	20.5
Cd36_08910	orf19.4808	0.0324056	0.57775	0.0560893	1.52816e-204	4926	1058.28	3867.72	549	426.333	122.667
Cd36_08920	orf19.4809	0.0190139	0.573172	0.0331731	1.84241e-65	1293	289.887	1003.11	135	116.167	18.8333
Cd36_08930	orf19.4811	0.0140367	0.499595	0.0280961	9.58907e-48	984	228.937	755.063	94	83.5	10.5
Cd36_08940	orf19.4812	0.0355777	0.693125	0.0513295	7.22018e-21	405	88.4264	316.574	51	40	11
Cd36_08950	orf19.4813	0.00243449	0.321477	0.00757281	7.47688e-61	1590	355.705	1234.29	96	93	3
Cd36_08960	orf19.4814	0.0120003	0.510658	0.0234996	9.74017e-18	333	81	252	33	30	3
Cd36_08970	orf19.4815	0.02025	0.436426	0.0463997	1.05338e-53	1398	321.875	1076.12	128	106.5	21.5
Cd36_08980	orf19.4816	0.0411875	0.612404	0.0672555	7.28371e-56	1347	290.699	1056.3	164	121.667	42.3333
Cd36_08990	orf19.4817	0.0439976	0.573516	0.0767156	9.9103e-34	918	180.847	737.153	104	72.5	31.5
Cd36_09000	orf19.4818	0.0482813	0.388926	0.12414	9.94317e-37	1545	365.219	1179.78	166	110.833	55.1667
Cd36_09010	orf19.4820	0.0122111	0.639981	0.0190805	8.64898e-94	1620	340.304	1279.7	162	146.5	15.5
Cd36_09020	orf19.4821	0.0418885	0.622256	0.0673172	2.2046e-60	1404	323.987	1080.01	181	137	44
Cd36_09030	orf19.4822	0.0548653	0.531228	0.10328	9.6171e-46	1395	327.08	1067.92	181	124.5	56.5
Cd36_09040	orf19.4823	0.0266686	0.430978	0.0618794	7.92872e-48	1389	320.3	1068.7	133	105	28
Cd36_09050	orf19.4824	0.0639793	0.691993	0.0924565	1.00573e-30	816	163.752	652.248	114	74	40
Cd36_09060	orf19.4825	0.024731	0.70306	0.0351761	3.46432e-25	462	92.0507	369.949	51	42	9
Cd36_09080	orf19.4827	0.00401996	0.450763	0.00891811	4.81961e-64	1284	286.296	997.704	101	97	4
Cd36_09090	orf19.4828	0.0877088	0.556155	0.157706	4.47932e-37	1521	322.965	1198.03	226	126.833	99.1667
Cd36_09100	orf19.4829	0.0433548	0.588671	0.0736486	2.91232e-88	2283	502.606	1780.39	280	205	75
Cd36_09110	orf19.4830	0.0475993	0.573929	0.0829359	7.386e-13	330	69.811	260.189	40	28	12
Cd36_09120	orf19.4831	0.00496475	0.334005	0.0148643	4.68714e-56	1539	326.476	1212.52	94	88	6
Cd36_09130	orf19.4833	0.00622097	0.273935	0.0227096	8.9939e-49	1653	361.686	1291.31	91	83	8
Cd36_09140	orf19.4834	0.0790304	0.559235	0.141319	9.43027e-19	702	142.067	559.933	98	56	42
Cd36_09150	orf19.4835	0.0085229	0.533109	0.0159872	7.67448e-84	1581	342.012	1238.99	141	130.5	10.5
Cd36_09160	orf19.4836	0.00883126	0.580366	0.0152167	4.79833e-77	1332	306.882	1025.12	133	124	9
Cd36_09170	orf19.4837	0.0462342	0.508175	0.0909809	1.28053e-27	831	184.226	646.774	97	68	29
Cd36_09180	orf19.4839	0.0529997	0.429718	0.123336	2.75889e-23	894	200.239	693.761	101	65.5	35.5
Cd36_09190	orf19.4841	0.0304335	0.549563	0.0553776	7.52279e-45	1077	233.169	843.831	116	90.8333	25.1667
Cd36_09200	orf19.4842	0.0151347	0.369152	0.0409985	3.57598e-12	339	72.0309	266.969	25	21	4
Cd36_09210	orf19.4843	0.0336353	0.551115	0.0610313	3.24056e-87	2193	475.268	1717.73	242	185.5	56.5
Cd36_09220	orf19.4844	0.0514466	0.432738	0.118886	2.70938e-29	1140	248.372	891.628	126	81.6667	44.3333
Cd36_09230	orf19.4845	0.0177331	0.357476	0.0496063	2.0908e-17	519	119.572	399.428	41	34	7
Cd36_09240	orf19.4846	0.0052437	0.421654	0.012436	1.89183e-57	1239	282.138	956.862	96	91	5
Cd36_09250	orf19.4848	0.0316963	0.556784	0.0569275	1.48818e-168	4197	894.369	3302.63	454	351.5	102.5
Cd36_09260	orf19.4849	0.0372352	0.415023	0.0897183	8.50232e-28	981	210.202	770.798	95	67	28
Cd36_09270	orf19.4850	0.0203871	0.390947	0.052148	3.86614e-58	1836	369.249	1466.75	142	112.5	29.5
Cd36_09280	orf19.4851	0.0162923	0.393908	0.0413606	2.29238e-41	1182	251.283	930.717	92	77	15
Cd36_09290	orf19.4853	0.0593511	0.501517	0.118343	8.33181e-49	1710	386.913	1323.09	217	141.5	75.5
Cd36_09300	orf19.4855	0.0114509	0.311754	0.0367306	2.24338e-14	450	98.0094	351.991	29	25	4
Cd36_09310	orf19.4856	0.109131	0.650606	0.167738	2.82158e-38	1407	327.209	1079.79	252	142.333	109.667
Cd36_09320	orf19.4857	0.024842	0.663679	0.0374308	3.73957e-41	816	161.204	654.796	87	71	16
Cd36_09330	orf19.4858	0.0635448	0.604156	0.105179	1.54964e-93	2883	608.43	2274.57	391	252.417	138.583
Cd36_09340	orf19.4861	0.0721338	0.48956	0.147344	1.10483e-19	798	165.489	632.511	103	59.5	43.5
Cd36_09350	orf19.4862	0.0774258	0.382842	0.20224	1.78994e-10	582	133.407	448.593	73	40	33
Cd36_09370	orf19.4863	0.0415377	0.516983	0.0803464	1.39742e-84	2460	542.084	1917.92	280	202.5	77.5
Cd36_09380	orf19.4864	0.0181605	0.381004	0.047665	8.82225e-30	912	187.461	724.539	69	56	13
Cd36_09390	orf19.4865	0.0190063	0.320975	0.0592144	1.89031e-49	1854	388.703	1465.3	129	101.5	27.5
Cd36_09400	orf19.4866	0.0599935	0.524836	0.114309	2.14749e-52	1770	396.931	1373.07	229	149.833	79.1667
Cd36_09410	orf19.4867	0.0490783	0.598049	0.0820641	1.428e-128	3519	750.985	2768.01	441	309.5	131.5
Cd36_09420	orf19.4869	0.0601947	0.460459	0.130728	2.74397e-40	1518	364.002	1154	192	125.25	66.75
Cd36_09430	orf19.4870	0.0207863	0.410591	0.0506254	6.99504e-55	1587	343.154	1243.85	134	108.5	25.5
Cd36_09440	orf19.4871	0.0263495	0.334456	0.0787833	1.78319e-42	1725	353.922	1371.08	131	95.5	35.5
Cd36_09450	orf19.4872	0.0721412	0.359673	0.200574	2.69625e-13	816	165.377	650.623	92	47.25	44.75
Cd36_09460	orf19.4873	0.0607681	0.5005	0.121415	1.02572e-13	507	95.8396	411.16	59	35	24
Cd36_09470	orf19.4874	0.0554394	0.456838	0.121355	6.21484e-45	1815	374.13	1440.87	205	128	77
Cd36_09480	orf19.4875	0.121063	0.416302	0.290805	2.27516e-06	465	91.5562	373.444	71	29.25	41.75
Cd36_09490	orf19.4878	0.128045	0.478647	0.267515	8.80278e-35	2514	567.855	1946.14	430	200.917	229.083
Cd36_09510	orf19.4880	0.0576601	0.615358	0.0937018	1.42292e-76	2166	463.279	1702.72	289	194.5	94.5
Cd36_09520	orf19.4882	0.0190177	0.582736	0.0326351	1.16281e-43	852	186.348	665.652	88	75.5	12.5
Cd36_09530	orf19.4883	0.0342884	0.531472	0.064516	6.05479e-83	2187	471.424	1715.58	237	179.5	57.5
Cd36_09540	orf19.4884	0.16987	0.638786	0.265926	2.24019e-38	2328	529.279	1798.72	501	227.583	273.417
Cd36_09550	orf19.4885	0.0130253	0.290796	0.0447918	1.10122e-26	921	224.018	696.982	63	54	9
Cd36_09560	orf19.4886	0.155187	0.422265	0.36751	6.24814e-07	711	160.532	550.468	129	51.8333	77.1667
Cd36_09570	orf19.4887	0.0499267	0.502898	0.099278	2.53227e-66	2178	480.32	1697.68	258	176	82
Cd36_09580	orf19.4888	0.0932206	0.328157	0.284073	3.40712e-09	765	173.7	591.3	98	46.1667	51.8333
Cd36_09590	orf19.4889	0.0327241	0.345737	0.0946502	2.38546e-42	1740	397.108	1342.89	153	110	43
Cd36_09600	orf19.4890	0.0318544	0.352193	0.0904458	2.94685e-71	2898	642.813	2255.19	251	180.667	70.3333
Cd36_09610	orf19.4892	0.00314767	0.292769	0.0107514	2.36952e-41	1215	259.912	955.088	66	63	3
Cd36_09630	orf19.4893	0.0659833	0.59438	0.111012	2.85412e-131	4275	889.633	3385.37	579	365.167	213.833
Cd36_09640	orf19.4894	0.00896227	0.54321	0.0164987	1.02985e-40	732	170.766	561.234	71	66	5
Cd36_09650	orf19.4895	0.039075	0.612887	0.0637556	1.68937e-35	819	175.525	643.475	98	73.5	24.5
Cd36_09660	orf19.4896	0.039171	0.470352	0.0832802	1.01837e-22	705	141.667	563.333	71	49.5	21.5
Cd36_09670	orf19.4897	0.0240899	0.537247	0.0448395	3.64824e-41	960	200.734	759.266	95	77	18
Cd36_09680	orf19.4898	0.0271003	0.411569	0.0658463	2.9228e-23	687	161.01	525.99	65	51	14
Cd36_09690	orf19.4899	0.0335955	0.461285	0.0728303	5.68559e-94	2838	631.28	2206.72	290	217.5	72.5
Cd36_09700	orf19.4900	0.0647646	0.43227	0.149824	6.27395e-51	2475	500.692	1974.31	287	164.5	122.5
Cd36_09720	orf19.4903	0.0379302	0.409543	0.092616	8.60747e-28	1029	204.387	824.613	95	64.5	30.5
Cd36_09730	orf19.4904	0.0430721	0.34465	0.124974	3.85226e-27	1311	277.762	1033.24	120	76.75	43.25
Cd36_09740	orf19.4905	0.0631742	0.576468	0.109588	1.19252e-48	1512	331.873	1180.13	205	133.5	71.5
Cd36_09750	orf19.4906	0.250753	0.840535	0.298325	2.47512e-34	2070	502.178	1567.82	588	253.833	334.167
Cd36_09760	orf19.4907	0.0410636	0.428495	0.0958321	9.89315e-48	1791	364.563	1426.44	176	119	57
Cd36_09770	orf19.4909	0.0161743	0.471113	0.0343322	6.3376e-89	2166	447.377	1718.62	184	156.5	27.5
Cd36_09790	orf19.4910	0.0388822	0.393959	0.0986959	6.31763e-22	750	195.786	554.214	81	60	21
Cd36_09800	orf19.4911	0.208704	0.529782	0.393943	6.53358e-09	948	208.811	739.189	214	79.3333	134.667
Cd36_09810	orf19.4912	0.0389056	0.566983	0.0686186	6.87848e-78	1932	454.961	1477.04	237	181	56
Cd36_09820	orf19.984	0.00996009	0.315412	0.031578	6.63181e-49	1506	343.709	1162.29	100	88.5	11.5
Cd36_09830	orf19.985	0.0513621	0.467783	0.109799	1.56901e-65	2451	517.188	1933.81	276	180	96
Cd36_09840	orf19.986	0.0113884	0.44796	0.0254229	1.24342e-47	1119	234.233	884.767	89	79	10
Cd36_09850	orf19.988	0.0114366	0.476587	0.0239969	1.31686e-55	1230	260.825	969.175	103	92	11
Cd36_09860	orf19.989	0.0221044	0.395972	0.0558233	9.88962e-34	1008	227.534	780.466	87	70	17
Cd36_09870	orf19.991	0.0393359	0.483888	0.0812913	2.01934e-48	1500	312.697	1187.3	157	111.5	45.5
Cd36_09880	orf19.992	0.0178588	0.45968	0.0388504	1.28144e-73	1869	395.729	1473.27	162	136	26
Cd36_09890	orf19.993	0.0274565	0.324142	0.0847051	2.24379e-13	522	113.988	408.012	41	30	11
Cd36_09900	orf19.997	0.00630508	0.257768	0.0244603	1.28059e-16	597	119.19	477.81	29	26	3
Cd36_09910	orf19.998	0.0568835	0.428813	0.132653	2.62915e-37	1560	355.177	1204.82	182	116	66
Cd36_09920	orf19.999	0.0874726	0.575895	0.15189	1.58621e-72	2811	625.835	2185.17	432	251.583	180.417
Cd36_09940	orf19.1832	0.0284389	0.288252	0.09866	1.14251e-36	1767	405.31	1361.69	135	97	38
Cd36_09950	orf19.1833	0.00808083	0.265864	0.0303946	5.18339e-39	1428	308.243	1119.76	78	69	9
Cd36_09960	orf19.1834	0.149093	0.452208	0.329701	5.90951e-25	2622	525.862	2096.14	462	178.583	283.417
Cd36_09970	orf19.1835	0.0528545	0.389753	0.13561	3.26245e-38	1800	376.143	1423.86	187	114.333	72.6667
Cd36_09980	orf19.1836	0.0630748	0.482064	0.130843	4.03492e-32	1263	262.923	1000.08	154	93.5	60.5
Cd36_10000	orf19.1839	0.00987852	0.348582	0.0283391	6.38873e-168	4962	1064.41	3897.59	335	296.75	38.25
Cd36_10010	orf19.1840	0.016807	0.456613	0.036808	1.19599e-149	3684	826.013	2857.99	330	282.5	47.5
Cd36_10020	orf19.2352	0.0230008	0.410305	0.056058	1.46146e-33	972	221.506	750.494	87	70	17
Cd36_10030	orf19.2351	0.00577182	0.414372	0.0139291	2.91678e-41	903	207.308	695.692	70	66	4
Cd36_10040	orf19.2350	0.0308738	0.483213	0.0638926	2.79517e-57	1554	352.777	1201.22	162	125.667	36.3333
Cd36_10050	orf19.2347	0.0434251	0.628482	0.0690952	9.41823e-72	1791	368.925	1422.08	217	157	60
Cd36_10060	orf19.2346	0.0259463	0.649557	0.0399447	1.81954e-94	1872	401.564	1470.44	212	174.5	37.5
Cd36_10070	orf19.2344	0.0554185	0.493035	0.112403	1.27891e-36	1152	300.267	851.733	154	108.5	45.5
Cd36_10090	orf19.2343	0.0679084	0.415774	0.16333	2.95647e-29	1446	319.054	1126.95	175	101.833	73.1667
Cd36_10100	orf19.2342	0.0152706	0.41665	0.036651	4.25455e-27	651	154.845	496.155	57	49.5	7.5
Cd36_10110	orf19.2341	0.0140177	0.541289	0.0258968	5.31102e-23	456	95.9637	360.036	42	37	5
Cd36_10120	orf19.2340	0.0015624	0.269891	0.00578902	1.66595e-82	2478	555.882	1922.12	129	126	3
Cd36_10130	orf19.2337	0.011129	0.390053	0.0285322	4.16619e-62	1629	361.675	1267.33	124	110	14
Cd36_10140	orf19.2336	0.0585249	0.33851	0.17289	1.94397e-11	606	138.266	467.734	64	37.6667	26.3333
Cd36_10150	orf19.2335	0.0172788	0.312478	0.0552959	3.17808e-41	1482	325.762	1156.24	103	83.25	19.75
Cd36_10160	orf19.2334	0.0293164	0.450452	0.0650821	1.84594e-32	966	200.804	765.196	90	68	22
Cd36_10170	orf19.2333	0.0266038	0.401717	0.0662252	5.87132e-47	1488	333.846	1154.15	134	103.833	30.1667
Cd36_10180	orf19.2332	0.112792	0.49734	0.226791	1.32074e-14	771	170.99	600.01	125	62.1667	62.8333
Cd36_10190	orf19.2331	0.0106678	0.380747	0.0280182	2.18267e-49	1335	280.779	1054.22	95	83.8333	11.1667
Cd36_10210	orf19.2330	0.0243593	0.45583	0.0534394	3.91944e-47	1293	270.802	1022.2	117	92.5	24.5
Cd36_10220	orf19.2328	0.0218193	0.35719	0.0610861	5.57262e-25	834	182.989	651.011	66	52	14
Cd36_10230	orf19.2326	0.0687067	0.392872	0.174883	2.09139e-26	1455	310.102	1144.9	170	94.8333	75.1667
Cd36_10240	orf19.2325	0.0913196	0.502838	0.181608	1.60555e-32	1551	337.526	1213.47	228	123.667	104.333
Cd36_10250	orf19.2324	0.0440548	0.414332	0.106327	3.45622e-35	1314	289.52	1024.48	136	92.1667	43.8333
Cd36_10270	orf19.2320	0.0352432	0.598159	0.0589194	2.75425e-61	1476	299.63	1176.37	164	123.5	40.5
Cd36_10290	orf19.2319	0.0276902	0.515166	0.0537501	3.68901e-75	2013	394.477	1618.52	191	147	44
Cd36_10300	orf19.2317	0.00483735	0.54469	0.00888093	5.62269e-31	531	116.216	414.784	47	45	2
Cd36_10310	orf19.2315	0.0335718	0.389301	0.0862363	2.03316e-43	1554	343.274	1210.73	144	104.25	39.75
Cd36_10320	orf19.2314	0.00932099	0.396747	0.0234935	2.46098e-16	405	81.1417	323.858	28	25	3
Cd36_10330	orf19.2313	0.015255	0.407328	0.0374514	2.27956e-44	1188	260.903	927.097	96	82	14
Cd36_10340	orf19.2312	0.0790665	0.477914	0.165441	3.57868e-44	2028	455.536	1572.46	279	161	118
Cd36_10350	orf19.2311	0.00504212	0.220773	0.0228384	2.72653e-20	780	183.01	596.99	38	35	3
Cd36_10370	orf19.2309	1.06572	2.32114	0.459138	0.000458457	762	166.541	595.459	458	119.25	338.75
Cd36_10380	orf19.2309	0.126299	0.489797	0.25786	4.03606e-29	2103	425.398	1677.6	348	153	195
Cd36_10390	orf19.2308	0.0194042	0.413928	0.0468782	3.73762e-38	1083	221.621	861.379	87	70.5	16.5
Cd36_10400	orf19.2307	0.0246129	0.413599	0.0595089	3.22002e-54	1623	356.482	1266.52	144	113.333	30.6667
Cd36_10410	orf19.2306	0.0142808	0.534732	0.0267065	4.429e-26	534	109.843	424.157	48	42	6
Cd36_10420	orf19.2305	0.033029	0.32361	0.102064	1.60133e-09	372	77.9944	294.006	30	20.5	9.5
Cd36_10430	orf19.2304	0.0199707	0.336103	0.0594183	1.44959e-28	1026	214.111	811.889	74	58	16
Cd36_10440	orf19.2303	0.0406373	0.452983	0.0897104	9.55942e-21	675	144.107	530.893	70	49	21
Cd36_10450	orf19.2302	0.0173392	0.478518	0.0362352	2.41291e-63	1467	329.33	1137.67	136	116.5	19.5
Cd36_10460	orf19.2301	0.0515334	0.595493	0.086539	4.76589e-26	693	150.862	542.138	89	62	27
Cd36_10470	orf19.2299	0.0128109	0.548639	0.0233503	2.10697e-16	303	66.818	236.182	29	26	3
Cd36_10480	orf19.2298	0.0341493	0.41522	0.0822439	2.12829e-38	1311	277.556	1033.44	123	88.5	34.5
Cd36_10490	orf19.2297	0.0189342	0.72277	0.0261967	2.80824e-45	750	161.677	588.323	86	75	11
Cd36_10510	orf19.2296	0.0952102	0.50632	0.188043	1.56254e-147	7221	1698.05	5522.95	1119	625.167	493.833
Cd36_10520	orf19.681	0.0498771	0.432862	0.115226	9.7496e-50	1893	440.64	1452.36	215	144.917	70.0833
Cd36_10530	orf19.680	0.0209271	0.395971	0.0528502	2.03923e-45	1407	292.545	1114.46	113	90	23
Cd36_10540	orf19.679	0.0529037	0.374091	0.141419	1.02489e-12	561	120.523	440.477	58	35.5	22.5
Cd36_10550	orf19.677	0.0133724	0.271718	0.0492143	1.131e-21	819	177.678	641.322	49	40.5	8.5
Cd36_10560	orf19.676	0.0306306	0.216198	0.141679	2.80215e-13	888	204.976	683.024	59	38.5	20.5
Cd36_10570	orf19.675	0.0437863	0.356143	0.122946	9.78398e-16	636	165.773	470.227	67	47	20
Cd36_10580	orf19.674	0.0674017	0.435438	0.15479	2.50317e-23	1071	225.538	845.462	129	74.5	54.5
Cd36_10590	orf19.673	0.03731	0.455769	0.0818617	1.42236e-35	1107	241.549	865.451	114	82.5	31.5
Cd36_10600	orf19.672	0.0313853	0.520941	0.0602475	1.88507e-65	1704	370.134	1333.87	180	139	41
Cd36_10610	orf19.671	0.0308041	0.413403	0.0745135	2.66636e-58	2007	408.265	1598.74	178	129.75	48.25
Cd36_10630	orf19.670	0.00426781	0.220603	0.0193461	1.60207e-08	303	68.0204	234.98	14	13	1
Cd36_10640	orf19.669	0.0415446	0.562972	0.0737952	3.32395e-70	1869	409.145	1459.86	221	162	59
Cd36_10650	orf19.668	0.0409286	0.409994	0.0998273	6.43546e-40	1470	327.698	1142.3	149	103.5	45.5
Cd36_10670	orf19.665	0.0196546	0.307351	0.0639484	1.75415e-21	801	182.421	618.579	58	46	12
Cd36_10680	orf19.664	0.0399608	0.340777	0.117264	2.60542e-16	726	160.664	565.336	66	44	22
Cd36_10690	orf19.663	0.0209139	0.441873	0.04733	5.20065e-147	4035	883.479	3151.52	360	295	65
Cd36_10710	orf19.661	0.0115023	0.333134	0.0345276	1.36747e-34	1074	212.526	861.474	67	57.1667	9.83333
Cd36_10720	orf19.660	0.0608689	0.476187	0.127826	1.15032e-49	1935	421.258	1513.74	237	148.5	88.5
Cd36_10730	orf19.658	0.0667104	0.384795	0.173366	9.52991e-61	3621	733.102	2887.9	405	220.667	184.333
Cd36_10740	orf19.657	0.0547578	0.675681	0.0810409	1.67669e-48	1155	264.96	890.04	165	118	47
Cd36_10770	orf19.655	0.0180958	0.220982	0.0818881	3.68354e-30	1632	373.559	1258.44	94	71.5	22.5
Cd36_10780	orf19.1171	0.0127755	0.439246	0.0290851	2.51538e-92	2256	479.776	1776.22	182	159.5	22.5
Cd36_10790	orf19.1170	0.00786604	0.42995	0.0182952	9.01849e-37	804	165.017	638.983	59	54	5
Cd36_10800	orf19.1169	0.0341426	0.591936	0.0576796	1.85861e-39	942	192.984	749.016	104	79	25
Cd36_10810	orf19.1168	0.0667926	0.502215	0.132996	2.09758e-16	573	127.024	445.976	75	46.5	28.5
Cd36_10820	orf19.1167	0.0139613	0.371462	0.0375847	5.21862e-41	1158	254.309	903.691	87	74.5	12.5
Cd36_10830	orf19.1166	0.0554379	0.54545	0.101637	1.55377e-123	3858	876.381	2981.62	499	339.667	159.333
Cd36_10840	orf19.1164	0.00719322	0.386952	0.0185894	1.60778e-24	558	138.938	419.062	45	42	3
Cd36_10850	orf19.1163	0.052954	0.56465	0.093782	5.38316e-38	1089	238.192	850.808	138	94.5	43.5
Cd36_10870	orf19.1162	0.0202977	0.348244	0.0582859	2.15681e-11	375	75.3821	299.618	27	21	6
Cd36_10880	orf19.1161	0.0307898	0.600004	0.051316	1.99868e-225	5130	1113.38	4016.62	581	459.833	121.167
Cd36_10890	orf19.1160	0.0100409	0.381856	0.026295	2.39251e-25	645	143.697	501.303	48	43	5
Cd36_10900	orf19.1159	0.0335398	0.439532	0.0763079	3.98364e-49	1518	344.251	1173.75	153	114.5	38.5
Cd36_10910	orf19.1158	0.122442	0.624509	0.196061	1.14137e-20	891	200.548	690.452	163	85	78
Cd36_10920	orf19.1156	0.0736766	0.533883	0.138002	1.85714e-31	1134	261.163	872.837	161	99.75	61.25
Cd36_10930	orf19.1155	0.0224738	0.505698	0.0444412	9.60009e-38	852	197.09	654.91	87	72.5	14.5
Cd36_10940	orf19.1154	0.00547	0.1967	0.0278089	5.83466e-11	471	104.034	366.966	20	18	2
Cd36_10950	orf19.1153	0.0263702	0.734598	0.0358975	1.46562e-96	1704	372.572	1331.43	209	174.5	34.5
Cd36_10980	orf19.1152	0.01382	0.245615	0.0562668	7.04455e-19	795	174.265	620.735	45	36.5	8.5
Cd36_11000	orf19.1150	0.086902	0.594343	0.146215	3.19038e-34	1260	266.779	993.221	191	109.5	81.5
Cd36_11010	orf19.1149	0.0604335	0.33732	0.179158	2.15041e-18	1077	250.309	826.691	116	68	48
Cd36_11020	orf19.1148	0.0857816	0.493239	0.173915	1.0583e-12	585	116.199	468.801	80	42	38
Cd36_11030	orf19.1146	0.0906414	0.874844	0.103609	1.40582e-16	366	82.9462	283.054	67	42.8333	24.1667
Cd36_11040	orf19.1142	0.0195041	0.319114	0.0611197	2.23993e-52	1917	436.689	1480.31	142	113.5	28.5
Cd36_11050	orf19.1140	0.0593593	0.354228	0.167574	1.15753e-11	624	130.463	493.537	65	36.8333	28.1667
Cd36_11060	orf19.1139	0.0554684	0.432991	0.128105	5.70847e-66	2865	601.916	2263.08	319	198	121
Cd36_11070	orf19.1137	0.0096363	0.312703	0.0308161	3.55826e-21	663	140.788	522.212	41	36	5
Cd36_11080	orf19.1136	0.00289367	0.252071	0.0114796	2.38904e-13	435	88.7505	346.249	20	19	1
Cd36_11090	orf19.1135	0.0666345	0.39802	0.167415	8.66979e-43	2400	481.353	1918.65	271	148.667	122.333
Cd36_11100	orf19.5282	0.0411151	0.581612	0.0706916	5.77488e-56	1440	302.739	1137.26	168	122.5	45.5
Cd36_11110	orf19.5281	0.0347644	0.358249	0.0970396	5.34871e-88	3651	825.059	2825.94	331	235	96
Cd36_11120	orf19.5280	0.0147136	0.407988	0.0360639	1.14964e-64	1659	389.289	1269.71	141	122.5	18.5
Cd36_11130	orf19.5279	0.0152974	0.422352	0.0362195	7.54182e-17	420	89.8015	330.199	34	29	5
Cd36_11140	orf19.5278	0.0363654	0.564405	0.0644313	7.16542e-42	1026	223.133	802.867	117	88.5	28.5
Cd36_11150	orf19.5277	0.132299	0.610947	0.216547	2.6776e-24	1209	260.836	948.164	224	109	115
Cd36_11160	orf19.5276	0.0879056	0.679251	0.129416	4.18598e-37	1245	238.364	1006.64	190	106.5	83.5
Cd36_11170	orf19.5275	0.194679	0.636035	0.306082	7.64189e-16	1206	237.866	968.134	268	102	166
Cd36_11180	orf19.5274	0.0860454	0.633155	0.135899	1.31558e-87	3024	656.023	2367.98	473	280.5	192.5
Cd36_11190	orf19.5271	0.126857	0.58109	0.218308	6.43578e-32	1713	351.345	1361.66	301	142.083	158.917
Cd36_11200	orf19.5270	0.0508385	0.419869	0.121082	1.86935e-25	1020	219.79	800.21	110	70.6667	39.3333
Cd36_11210	orf19.5269	0.191497	0.431935	0.443348	5.63016e-09	1368	299.979	1068.02	279	98.5	180.5
Cd36_11220	orf19.5268	0.028486	0.31084	0.091642	4.50006e-11	456	98.2418	357.758	35	25	10
Cd36_11230	orf19.5267	0.17089	0.506049	0.337695	9.42599e-07	471	120.914	350.086	98	44.5	53.5
Cd36_11240	orf19.5266	0.194214	0.507871	0.382408	1.67834e-11	1332	268.324	1063.68	281	99	182
Cd36_11250	orf19.5265	0.0207538	0.435422	0.0476637	8.51434e-97	2685	584.295	2100.7	236	193	43
Cd36_11260	orf19.5263	0.00606191	0.32554	0.0186211	2.26491e-50	1389	312.392	1076.61	89	82.5	6.5
Cd36_11270	orf19.5262	0.169443	0.43207	0.392164	0.000491318	429	84.4922	344.508	80	27.75	52.25
Cd36_11280	orf19.5260	0.014749	0.391846	0.0376398	2.17762e-102	2856	630.722	2225.28	225	192.5	32.5
Cd36_11290	orf19.5259	0.0665559	0.495167	0.134411	8.34834e-19	717	151.746	565.254	91	55	36
Cd36_11300	orf19.5258	0.0796353	0.462904	0.172034	3.54185e-37	1860	390.837	1469.16	246	135	111
Cd36_11310	orf19.5257	0.041971	0.590712	0.0710515	2.40755e-63	1587	345.724	1241.28	192	141.333	50.6667
Cd36_11320	orf19.5256	0.0251054	0.455602	0.0551038	2.11004e-48	1353	279.686	1073.31	122	95.5	26.5
Cd36_11330	orf19.5255	0.0122823	0.428221	0.0286823	2.21095e-81	2001	441.361	1559.64	163	144	19
Cd36_11340	orf19.5254	0.0762442	0.537223	0.141923	1.46246e-10	369	74.7342	294.266	50	28.6667	21.3333
Cd36_11350	orf19.5253	0.0673977	0.558224	0.120736	1.25437e-64	2196	484.295	1711.71	301	190.667	110.333
Cd36_11360	orf19.5251	0.0414303	0.592306	0.0699474	1.28886e-92	2391	505.46	1885.54	283	207	76
Cd36_11370	orf19.5250	0.0158853	0.394658	0.0402508	5.65515e-18	486	104.279	381.721	38	32	6
Cd36_11380	orf19.5249	0.0363062	0.309054	0.117475	1.65228e-12	606	126.336	479.664	49	32	17
Cd36_11390	orf19.5248	0.0296467	0.877328	0.033792	9.5673e-33	501	105.381	395.619	66	54.5	11.5
Cd36_11400	orf19.5247	0.0244014	0.527071	0.0462962	8.27267e-53	1278	257.536	1020.46	122	97.5	24.5
Cd36_11410	orf19.5246	0.111056	0.514864	0.2157	5.74644e-22	1161	256.828	904.172	189	95.6667	93.3333
Cd36_11420	orf19.5245	0.11352	0.564892	0.200959	1.50576e-43	2163	467.007	1695.99	364	185.333	178.667
Cd36_11430	orf19.5244	0.0225453	0.447796	0.0503471	1.35783e-105	2904	630.227	2273.77	263	212.5	50.5
Cd36_11440	orf19.5243	0.0262618	0.361683	0.07261	3.91585e-43	1551	336.873	1214.13	128	96.6667	31.3333
Cd36_11450	orf19.5242	0.0666373	0.492672	0.135257	9.27444e-36	1419	297.655	1121.35	179	107.5	71.5
Cd36_11470	orf19.5241	0.0667081	0.539498	0.123648	1.05479e-81	2901	638.39	2262.61	390	245.583	144.417
Cd36_11480	orf19.5239	0.0613839	0.359973	0.170524	1.35816e-24	1347	297.894	1049.11	147	85.1667	61.8333
Cd36_11490	orf19.5238	0.016897	0.412032	0.041009	1.23391e-67	1815	408.495	1406.51	153	129.5	23.5
Cd36_11500	orf19.5237	0.0410764	0.505673	0.0812312	2.58064e-22	639	138.648	500.352	71	51	20
Cd36_11510	orf19.5236	0.00686937	0.357947	0.019191	1.94916e-36	942	210.792	731.208	65	60	5
Cd36_11520	orf19.5235	0.0791554	0.237343	0.333506	2.69443e-05	696	130.25	565.75	69	26.5	42.5
Cd36_11530	orf19.5234	0.0551798	0.378713	0.145703	4.82951e-40	1968	431.312	1536.69	210	128.25	81.75
Cd36_11540	orf19.5232	0.0101151	0.211191	0.0478956	7.47344e-18	876	179.288	696.712	40	33	7
Cd36_11550	orf19.5231	0.0698735	0.397161	0.175932	1.14596e-21	1194	249.719	944.281	140	77	63
Cd36_11560	orf19.5230	0.0277566	0.298708	0.0929224	1.08716e-22	1002	231.338	770.662	78	57	21
Cd36_11570	orf19.5229	0.0232678	0.330383	0.0704268	5.57636e-77	2994	644.289	2349.71	226	172.167	53.8333
Cd36_11580	orf19.5228	0.0298261	0.253669	0.117579	9.01314e-08	372	81.3105	290.689	26	17.5	8.5
Cd36_11590	orf19.5227	0.0567042	0.404984	0.140016	4.96469e-12	483	103.058	379.942	53	32.25	20.75
Cd36_11600	orf19.5226	0.00907163	0.382115	0.0237406	6.33071e-49	1272	273.884	998.116	91	82	9
Cd36_11610	orf19.5225	1.49567	1.46771	1.01905	0.893782	357	78.4122	278.588	231	50.5	180.5
Cd36_11620	orf19.5225	0.0807614	0.346249	0.233247	5.52991e-06	375	81.1323	293.868	45	22.5	22.5
Cd36_11630	orf19.5221	0.0457151	0.552202	0.0827868	4.38452e-101	2910	623.251	2286.75	345	243.583	101.417
Cd36_11640	orf19.5220	0.0519555	0.315509	0.164672	1.42466e-14	828	180.548	647.452	79	46.5	32.5
Cd36_11650	orf19.5219	0.0384503	0.466802	0.0823696	2.28468e-242	7929	1699.23	6229.77	824	590.5	233.5
Cd36_11660	orf19.69	0.188172	0.517971	0.363286	5.31877e-08	717	162.187	554.813	153	60.6667	92.3333
Cd36_11670	orf19.68.2	0.0898831	0.327	0.274872	3.1862e-05	402	77.3477	324.652	48	20.5	27.5
Cd36_11680	orf19.3767	0.0313586	0.33569	0.0934154	1.24496e-89	3972	846.194	3125.81	325	229	96
Cd36_11690	orf19.3765	0.0350357	0.364876	0.0960208	3.55472e-99	4146	883.751	3262.25	367	255.333	111.667
Cd36_11700	orf19.3764	0.0530461	0.40164	0.132074	3.96058e-46	2166	431.437	1734.56	223	134.167	88.8333
Cd36_11710	orf19.3763	0.0433243	0.262232	0.165214	5.66364e-19	1335	277.91	1057.09	106	61.5	44.5
Cd36_11720	orf19.3762	0.111701	0.226869	0.492357	0.0109601	525	103.438	421.562	64	20.25	43.75
Cd36_11730	orf19.3761	0.00782014	0.327206	0.0238998	2.4012e-93	2730	609.044	2120.96	178	161.5	16.5
Cd36_11740	orf19.3760	0.0121582	0.321331	0.0378371	4.64633e-31	972	225.745	746.255	68	59	9
Cd36_11750	orf19.3759	0.0330776	0.493731	0.0669952	1.31345e-49	1338	302.733	1035.27	143	109.5	33.5
Cd36_11760	orf19.3758	0.0123244	0.347543	0.0354615	4.29523e-48	1419	314.59	1104.41	101	87.5	13.5
Cd36_11770	orf19.3757	0.0191509	0.141457	0.135383	0.000242074	342	77.5688	264.431	15	10	5
Cd36_11780	orf19.3756	0.0335257	0.289444	0.115828	3.01613e-31	1674	357.439	1316.56	129	85.8333	43.1667
Cd36_11790	orf19.3755	0.0253163	0.33244	0.076153	3.41036e-17	660	137.781	522.219	50	37	13
Cd36_11800	orf19.6362	0.0475151	0.445344	0.106693	1.33981e-114	4320	938.972	3381.03	471	315.333	155.667
Cd36_11810	orf19.6360	0.146221	0.515657	0.283564	4.94596e-09	600	122.019	477.981	109	45.5	63.5
Cd36_11820	orf19.6359	0.0421681	0.295174	0.142859	1.42928e-07	399	81.9624	317.038	33	20	13
Cd36_11830	orf19.6358	NA	0.139527	0	NA	411	86.3985	324.602	11	11	NA
Cd36_11840	orf19.6357	0.0441857	0.459219	0.0962193	8.13292e-57	2073	402.811	1670.19	210	138.333	71.6667
Cd36_11850	orf19.6356	0.0571083	0.337312	0.169304	2.08958e-42	2715	547.868	2167.13	268	148.833	119.167
Cd36_11860	orf19.6355	0.0164797	0.254646	0.0647162	1.45906e-34	1551	334.229	1216.77	92	72.1667	19.8333
Cd36_11870	orf19.6354	0.0591503	0.344334	0.171782	7.92873e-11	633	123.136	509.864	63	34	29
Cd36_11880	orf19.6351	0.083041	0.308537	0.269144	7.15484e-14	1350	280.358	1069.64	155	70.9167	84.0833
Cd36_11890	orf19.6350	0.157232	0.365218	0.430517	0.000358138	537	121.053	415.947	94	35	59
Cd36_11910	orf19.6349	0.0568005	0.241318	0.235376	4.59283e-10	987	197.889	789.111	84	40.8333	43.1667
Cd36_11920	orf19.6348	0.0496268	0.324172	0.153088	1.59024e-44	2649	561.35	2087.65	248	147.75	100.25
Cd36_11930	orf19.6347	0.110452	0.366971	0.300983	7.83451e-15	1464	302.084	1161.92	207	87.6667	119.333
Cd36_11940	orf19.6346	0.0822278	0.208317	0.394724	7.66595e-05	939	181.429	757.571	92	33	59
Cd36_11950	orf19.6345	0.0337516	0.209191	0.161343	8.55554e-31	2721	569.706	2151.29	175	104	71
Cd36_11970	orf19.6343	0.0275129	0.194665	0.141335	6.54774e-13	999	221.635	777.365	59	38	21
Cd36_11980	orf19.6342	0.182321	0.354314	0.514576	0.00723005	480	93.845	386.155	89	26.5	62.5
Cd36_11990	orf19.6341	0.129789	0.406237	0.319491	1.16371e-09	864	195.541	668.459	141	61.3333	79.6667
Cd36_12000	orf19.6340	0.00598064	0.225987	0.0264645	2.65926e-16	642	138.379	503.621	30	27	3
Cd36_12010	orf19.4913	0.0541258	0.46061	0.117509	2.30854e-87	3519	716.693	2802.31	393	246.667	146.333
Cd36_12020	orf19.4914	0.097572	0.445389	0.219071	5.20389e-07	351	73.1968	277.803	50	24.5833	25.4167
Cd36_12030	orf19.4916	0.165748	0.697722	0.237556	2.9386e-28	1443	318.895	1124.1	312	144.833	167.167
Cd36_12040	orf19.4922	0.0173176	0.374346	0.0462611	2.34178e-27	819	176.448	642.552	63	52	11
Cd36_12050	orf19.4923	0.0286333	0.389654	0.0734839	4.77955e-44	1536	325.761	1210.24	133	99	34
Cd36_12060	orf19.4924	0.0584101	0.505128	0.115634	2.43109e-108	3948	851.56	3096.44	487	313	174
Cd36_12070	orf19.4927	0.0291881	0.445711	0.0654868	2.24232e-169	5184	1114.48	4069.52	491	374.5	116.5
Cd36_12080	orf19.4928	0.0505876	0.430098	0.117619	6.66084e-52	2163	442.479	1720.52	229	144.833	84.1667
Cd36_12090	orf19.4929	0.0715081	0.483551	0.147881	5.37107e-79	3522	731.391	2790.61	451	260.667	190.333
Cd36_12100	orf19.4930	0.00896014	0.395408	0.0226605	7.93155e-24	576	126.906	449.094	43	39	4
Cd36_12110	orf19.4931	0.0172381	0.359657	0.0479292	1.67687e-71	2340	476.898	1863.1	168	136.25	31.75
Cd36_12120	orf19.4931	0.809389	1.44687	0.559407	0.0195787	393	85.1471	307.853	207	54.5833	152.417
Cd36_12130	orf19.4932	0.00853216	0.307803	0.0277195	3.13303e-72	2283	514.926	1768.07	145	130	15
Cd36_12140	orf19.4933	0.0213041	0.341217	0.0624358	1.54235e-36	1299	275.404	1023.6	97	75.5	21.5
Cd36_12150	orf19.4934	0.0456918	0.272582	0.167626	3.33867e-19	1209	295.352	913.648	108	67.5	40.5
Cd36_12160	orf19.4937	0.00798609	0.343924	0.0232205	4.40394e-129	3639	806.575	2832.42	245	222.5	22.5
Cd36_12180	orf19.4939	0.062581	0.544796	0.114871	2.95649e-138	4899	1014.17	3884.83	626	392.75	233.25
Cd36_12200	orf19.4940	0.0203721	0.683962	0.0297854	2.71118e-96	1677	383.334	1293.67	198	172	26
Cd36_12210	orf19.4941	0.0500035	0.436709	0.114501	7.65024e-21	807	166.147	640.853	86	55	31
Cd36_12220	orf19.4943	0.0394349	0.570445	0.0691301	2.5585e-53	1368	292.062	1075.94	158	116.667	41.3333
Cd36_12230	orf19.4945	0.0260998	0.559036	0.0466871	1.49235e-155	3633	767.601	2865.4	376	302.5	73.5
Cd36_12240	orf19.4946	0.0513016	0.496152	0.103399	1.28636e-23	759	160.717	598.283	88	58.3333	29.6667
Cd36_12250	orf19.4947	0.023454	0.352867	0.0664668	1.63148e-15	507	117.238	389.762	42	33	9
Cd36_12260	orf19.4948	0.0629583	0.469293	0.134156	9.84627e-30	1203	250.828	952.172	145	87.5	57.5
Cd36_12270	orf19.4950	0.050506	0.415698	0.121497	4.00289e-56	2397	506.588	1890.41	254	161.667	92.3333
Cd36_12280	orf19.4951	0.24304	0.503593	0.482612	7.32498e-05	681	154.726	526.274	166	56.75	109.25
Cd36_12290	orf19.4952	0.0471301	0.231808	0.203315	1.44051e-10	918	195.58	722.42	72	39	33
Cd36_12310	orf19.4953	0.111046	0.407212	0.272697	2.52168e-11	873	184.315	688.685	129	57.9167	71.0833
Cd36_12320	orf19.4954	0.0171891	0.312696	0.0549705	2.1432e-18	588	146.657	441.343	45	37.5	7.5
Cd36_12330	orf19.4955	0.0683049	0.288857	0.236466	8.29628e-16	1386	289.556	1096.44	141	69.4167	71.5833
Cd36_12340	orf19.4956	0.0245848	0.338236	0.0726853	1.0198e-76	2943	648.306	2294.69	232	176.5	55.5
Cd36_12350	orf19.4958	0.0717956	0.44575	0.161067	1.30947e-34	1722	344.193	1377.81	210	115.667	94.3333
Cd36_12360	orf19.4959	0.0336899	0.243244	0.138503	2.37015e-25	1662	361.833	1300.17	118	75.1667	42.8333
Cd36_12370	orf19.4960	0.0269259	0.322898	0.0833883	1.80064e-23	996	201.999	794.001	74	53	21
Cd36_12380	orf19.4961	0.0921124	0.304007	0.302994	1.36077e-14	1650	336.749	1313.25	198	84.1667	113.833
Cd36_12390	orf19.4962	0.204743	0.555915	0.368299	1.23969e-09	963	189.548	773.452	213	74.4167	138.583
Cd36_12400	orf19.4963	0.078361	0.18005	0.435218	0.000123751	1143	221.259	921.741	104	35.4167	68.5833
Cd36_12410	orf19.4964	0.0755171	0.352873	0.214006	4.80935e-12	795	161.645	633.355	91	45.5	45.5
Cd36_12420	orf19.4965	0.123502	0.427292	0.289035	7.83043e-22	1959	391.418	1567.58	306	127.5	178.5
Cd36_12430	orf19.4966	0.023746	0.260787	0.0910549	5.29548e-42	2193	471.001	1722	144	103.75	40.25
Cd36_12450	orf19.4969	0.0336742	0.283291	0.118868	7.03721e-76	4395	907.74	3487.26	329	214.167	114.833
Cd36_12460	orf19.4970	0.138351	0.438418	0.315569	7.46366e-18	1722	347.404	1374.6	289	115.333	173.667
Cd36_12470	orf19.4972	0.206846	0.545365	0.379279	7.5003e-18	1851	427.485	1423.51	423	165.667	257.333
Cd36_12480	orf19.4979	0.0401332	0.370382	0.108356	7.78025e-44	1980	393.442	1586.56	177	115	62
Cd36_12490	orf19.4980	0.00466251	0.340577	0.01369	1.7252e-75	1959	452.99	1506.01	131	124	7
Cd36_12500	orf19.4981	0.13954	0.444366	0.31402	8.715e-23	2109	459.059	1649.94	364	153.917	210.083
Cd36_12510	orf19.4982	0.0536051	0.354638	0.151155	3.42452e-30	1626	337.364	1288.64	162	95.3333	66.6667
Cd36_12520	orf19.4983	0.0437166	0.274697	0.159145	2.37919e-12	801	165.211	635.789	65	38	27
Cd36_12530	orf19.4985	0.0560597	0.29231	0.191782	3.52154e-23	1752	363.518	1388.48	163	88	75
Cd36_12540	orf19.4987	0.0448677	0.411506	0.109033	6.73397e-35	1320	302.06	1017.94	140	95.6667	44.3333
Cd36_12550	orf19.4988	0.096839	0.393795	0.245912	2.82717e-19	1491	294.86	1196.14	199	90.3333	108.667
Cd36_12560	orf19.4991	0.045857	0.386053	0.118784	4.47183e-63	2790	598.164	2191.84	278	180.5	97.5
Cd36_12570	orf19.4993	0.00887357	0.328009	0.0270528	2.57766e-79	2388	517.523	1870.48	154	137.5	16.5
Cd36_12580	orf19.4995	0.0667624	0.486486	0.137234	8.1403e-31	1209	264.48	944.52	155	94.6667	60.3333
Cd36_12590	orf19.4997	0.0627848	0.391028	0.160564	5.29431e-41	2133	464.36	1668.64	242	141.5	100.5
Cd36_12600	orf19.4998	0.206811	0.686082	0.301437	5.23035e-37	2697	563.718	2133.28	639	253.417	385.583
Cd36_12620	orf19.5001	0.0721814	0.564464	0.127876	4.86024e-49	1701	375.014	1325.99	240	148.75	91.25
Cd36_12630	orf19.5003	0.0980622	0.563861	0.173912	1.49256e-28	1242	255.655	986.345	192	101.333	90.6667
Cd36_12640	orf19.5004	0.0416778	0.547033	0.0761888	2.00821e-92	2517	566.295	1950.71	299	219.917	79.0833
Cd36_12650	orf19.5005	0.032314	0.513905	0.0628793	3.95008e-74	1914	433.232	1480.77	208	161.167	46.8333
Cd36_12660	orf19.5006	0.0245917	0.517813	0.0474914	4.47115e-23	531	117.655	413.345	54	44	10
Cd36_12710	orf19.5009	0.0364059	0.423462	0.085972	3.50578e-52	1881	375.503	1505.5	175	121.5	53.5
Cd36_12720	orf19.5010	0.00724399	0.375232	0.0193054	8.71159e-40	978	215.077	762.923	69	63.5	5.5
Cd36_12730	orf19.5011	0.0439664	0.337379	0.130318	1.77942e-43	2220	481.226	1738.77	205	130.75	74.25
Cd36_12740	orf19.5012	0.0564827	0.47942	0.117815	4.0696e-14	477	100.219	376.781	56	35.5	20.5
Cd36_12750	orf19.5013	0.0327724	0.310715	0.105474	6.68552e-34	1608	352.803	1255.2	130	89.75	40.25
Cd36_12760	orf19.5014	0.0243932	0.393336	0.0620163	2.15222e-23	705	163.352	541.648	63	50	13
Cd36_12770	orf19.5015	0.00924235	0.352396	0.0262272	3.24549e-160	4683	981.567	3701.43	310	276	34
Cd36_12780	orf19.5016	0.0545998	0.424633	0.128581	5.24298e-10	354	78.6475	275.352	40	25.5	14.5
Cd36_12790	orf19.5017	0.0194571	0.509825	0.0381643	2.84331e-91	2013	477.093	1535.91	206	176.5	29.5
Cd36_12800	orf19.5019	0.0495047	0.510795	0.0969171	1.09139e-61	2052	423.821	1628.18	235	157	78
Cd36_12810	orf19.5020	0.0755924	0.546872	0.138227	4.03252e-28	1008	229.224	778.776	145	89	56
Cd36_12820	orf19.5021	0.0419093	0.497381	0.0842599	1.41696e-42	1251	281.911	969.089	142	102.5	39.5
Cd36_12830	orf19.5022	0.022248	0.510867	0.0435495	3.64263e-84	1932	449.422	1482.58	199	166.5	32.5
Cd36_12840	orf19.5023	0.0184643	0.469473	0.0393298	3.98768e-64	1527	348.197	1178.8	143	121.5	21.5
Cd36_12850	orf19.5024	0.0188636	0.201656	0.0935432	5.48833e-24	1485	330.843	1154.16	80	58.5	21.5
Cd36_12870	orf19.5026	0.0274269	0.504401	0.0543751	4.09579e-133	3474	744.846	2729.15	347	273.5	73.5
Cd36_12880	orf19.5027	0.00976748	0.33204	0.0294166	1.72027e-58	1707	384.542	1322.46	116	103.167	12.8333
Cd36_12890	orf19.5029	0.0316857	0.62638	0.0505855	4.7315e-73	1626	336.748	1289.25	183	143	40
Cd36_12900	orf19.5030	0.0459517	0.606058	0.0758206	1.25281e-39	1047	205.67	841.33	123	85.5	37.5
Cd36_12910	orf19.5031	0.0583345	0.42808	0.13627	4.18695e-46	1983	450.666	1532.33	233	147	86
Cd36_12920	orf19.5032	0.0438795	0.233172	0.188185	2.77425e-14	1113	250.739	862.261	87	50.25	36.75
Cd36_12930	orf19.5033	0.0516697	0.438328	0.117879	9.4517e-14	492	111.467	380.533	56	37	19
Cd36_12940	orf19.5034	0.036178	0.359147	0.100733	2.67385e-44	1929	395.373	1533.63	167	112.833	54.1667
Cd36_12950	orf19.5035	0.0665056	0.450147	0.147742	1.07396e-37	1617	367.83	1249.17	204	124.5	79.5
Cd36_12960	orf19.7205	0.04343	0.566062	0.076723	1.21307e-77	2016	475.587	1540.41	254	189	65
Cd36_12970	orf19.7206	0.00633568	0.520886	0.0121633	6.52467e-33	606	130.488	475.512	52	49	3
Cd36_12980	orf19.7207	0.0484704	0.626587	0.0773562	2.18522e-95	2433	526.204	1906.8	313	223.5	89.5
Cd36_12990	orf19.7208	0.00572259	0.489066	0.0117011	8.69959e-58	1122	244.933	877.067	93	88	5
Cd36_13000	orf19.7209	0.0258062	0.31407	0.082167	1.33144e-10	405	89.6326	315.367	31	23	8
Cd36_13010	orf19.7210	0.0356605	0.468189	0.0761669	6.01142e-34	1005	220.146	784.854	104	76.6667	27.3333
Cd36_13020	orf19.7212	0.0157494	0.512522	0.0307292	7.80346e-96	2070	465.914	1604.09	198	173	25
Cd36_13030	orf19.7213	0.0390594	0.516947	0.0755579	2.23987e-117	3369	741.553	2627.45	377	277	100
Cd36_13040	orf19.7214	0.0354911	0.517902	0.0685285	4.52342e-54	1506	308.807	1197.19	157	115.5	41.5
Cd36_13050	orf19.7215	0.0363933	0.460864	0.0789676	1.24713e-170	5454	1189.33	4264.67	561	409.5	151.5
Cd36_13070	orf19.7216	0.0117514	0.254219	0.0462256	7.72041e-17	663	148.412	514.588	38	32	6
Cd36_13080	orf19.7217	0.00610973	0.117191	0.0521347	5.0063e-14	1089	267.295	821.705	34	29	5
Cd36_13090	orf19.7218	0.0482079	0.304297	0.158424	1.70712e-14	813	191.899	621.101	77	48	29
Cd36_13100	orf19.7219	0.0113225	0.34502	0.0328169	8.58595e-39	1143	253.119	889.881	80	70	10
Cd36_13110	orf19.7221	0.0619563	0.455813	0.135925	1.79423e-74	3138	692.636	2445.36	382	236.583	145.417
Cd36_13120	orf19.7222	0.00711357	0.339814	0.0209337	6.35666e-14	363	80.5118	282.488	24	22	2
Cd36_13130	orf19.7223	0.0624759	0.519022	0.120372	5.2924e-46	1731	340.826	1390.17	211	127.667	83.3333
Cd36_13140	orf19.7224	0.055071	0.518172	0.106279	1.30843e-47	1674	324.286	1349.71	193	121.333	71.6667
Cd36_13150	orf19.7225	0.127588	0.497234	0.256595	1.07451e-22	1542	325.297	1216.7	261	118.25	142.75
Cd36_13160	orf19.7227	0.0849919	0.742876	0.114409	9.72354e-15	372	79.5406	292.459	61	37.5	23.5
Cd36_13170	orf19.7228	0.018483	0.354166	0.0521875	4.81288e-31	990	223.176	766.824	77	63	14
Cd36_13180	orf19.7229	0.0183759	0.419878	0.0437649	1.33292e-92	2595	556.725	2038.28	216	179	37
Cd36_13190	orf19.7231	0.0124305	0.550861	0.0225656	1.92388e-59	1146	253.726	892.274	110	99	11
Cd36_13200	orf19.7232	0.0664091	0.576661	0.115161	2.38993e-95	3267	668.155	2598.84	434	268.833	165.167
Cd36_13210	orf19.7234	0.0365835	0.563257	0.0649498	2.3318e-65	1680	349.675	1330.33	186	138.5	47.5
Cd36_13220	orf19.7235	0.0366992	0.688137	0.0533313	7.1409e-127	2652	576.567	2075.43	334	259.667	74.3333
Cd36_13230	orf19.7236	0.0108831	0.301875	0.0360517	1.41954e-25	837	189.123	647.877	54	47	7
Cd36_13240	orf19.7237	0.0941238	0.714267	0.131777	8.00945e-26	801	166.983	634.017	133	76.9167	56.0833
Cd36_13250	orf19.7238	0.00765998	0.428936	0.0178581	6.42522e-39	852	195.918	656.082	69	64	5
Cd36_13260	orf19.7239	0.101415	0.545819	0.185804	3.41362e-42	1872	445.296	1426.7	308	172.667	135.333
Cd36_13270	orf19.7242	0.0420436	0.695502	0.0604508	3.41253e-172	3720	821.76	2898.24	491	372.5	118.5
Cd36_13280	orf19.7243	0.0250087	0.714175	0.0350175	3.34085e-57	1011	218.198	792.802	120	100.5	19.5
Cd36_13290	orf19.7244	0.0130014	0.63159	0.0205852	3.40502e-40	693	149.917	543.083	71	64	7
Cd36_13300	orf19.7245	0.0704245	1.00245	0.0702523	2.54183e-68	1260	280.617	979.383	221	155.167	65.8333
Cd36_13310	orf19.7247	0.0501616	0.784617	0.0639314	4.05624e-91	1929	400.45	1528.55	269	194.833	74.1667
Cd36_13320	orf19.7250	0.0541026	0.845935	0.063956	1.8119e-22	423	87.7333	335.267	62	44.5	17.5
Cd36_13330	orf19.7251	0.090967	0.73861	0.12316	2.44923e-52	1437	340.698	1096.3	254	160.083	93.9167
Cd36_13340	orf19.7254	0.112649	1.09039	0.103311	9.14497e-80	1791	392.78	1398.22	372	225.75	146.25
Cd36_13350	orf19.7255	0.0058899	0.331229	0.0177819	8.95185e-09	219	48.5502	170.45	14	13	1
Cd36_13360	orf19.7257	0.196606	0.955526	0.205757	4.86825e-46	1755	409.706	1345.29	454	221.333	232.667
Cd36_13370	orf19.7258	0.108122	0.955841	0.113117	4.40118e-39	954	209.138	744.862	188	113	75
Cd36_13380	orf19.7260	0.160318	1.27456	0.125783	3.1184e-33	762	177.161	584.839	193	108.583	84.4167
Cd36_13390	orf19.7261	0.0115642	0.513344	0.0225272	1.69346e-66	1347	301.296	1045.7	124	112	12
Cd36_15040	orf19.1920	0.161776	0.774636	0.208841	1.20469e-13	528	121.979	406.021	118	58.9167	59.0833
Cd36_15050	orf19.1917	0.0854884	0.831328	0.102834	2.71269e-46	1131	248.12	882.88	196	124.667	71.3333
Cd36_15070	orf19.1914	0.15531	0.816905	0.190119	1.04243e-33	1296	283.171	1012.83	283	140.917	142.083
Cd36_15080	orf19.1913	0.140397	0.924936	0.151791	1.61358e-22	612	145.346	466.654	137	77.25	59.75
Cd36_15090	orf19.1911	0.032135	0.742365	0.0432874	3.15124e-63	1149	258.876	890.124	150	122	28
Cd36_15100	orf19.1910	0.0636779	0.784175	0.0812037	2.46842e-29	621	145.976	475.024	100	71	29
Cd36_15110	orf19.1907	0.0508074	0.803689	0.0632177	8.48576e-104	2127	456.081	1670.92	307	224.917	82.0833
Cd36_15120	orf19.2119	0.0270474	0.661606	0.0408814	9.88919e-75	1494	308.25	1185.75	167	135.5	31.5
Cd36_15130	orf19.2117	0.028969	0.545657	0.0530902	4.30596e-53	1215	282.45	932.55	136	109.5	26.5
Cd36_15140	orf19.2116	0.0447378	0.652297	0.0685851	4.55751e-28	627	139.622	487.378	82	60.8333	21.1667
Cd36_15150	orf19.2115	0.0203486	0.545387	0.0373104	5.51412e-61	1293	296.737	996.263	135	115	20
Cd36_15160	orf19.2114	0.0170752	0.404801	0.0421817	4.97134e-33	909	198.195	710.805	74	62	12
Cd36_15170	orf19.2113	0.0367009	0.632115	0.0580605	5.7523e-63	1377	316.064	1060.94	173	135	38
Cd36_15180	orf19.2112	0.0435307	0.622575	0.0699204	8.04449e-34	798	171.397	626.603	99	72.5	26.5
Cd36_15190	orf19.2111.2	NA	0.127458	0	NA	234	51.1875	182.812	6	6	NA
Cd36_15200	orf19.2111	0.0280562	0.553031	0.0507316	6.7613e-49	1143	235.159	907.841	117	92	25
Cd36_15210	orf19.2110	0.0519304	0.689455	0.0753209	7.76737e-59	1386	293.122	1092.88	187	132.167	54.8333
Cd36_15220	orf19.2108	0.031688	0.514801	0.061554	1.40969e-36	948	206.733	741.267	100	77	23
Cd36_15230	orf19.2107.1	0.0139229	0.263412	0.052856	7.73383e-07	267	49.5214	217.479	14	11	3
Cd36_15240	orf19.2107	0.0197007	0.620313	0.0317592	3.17626e-58	1116	241.701	874.299	119	102	17
Cd36_15250	orf19.2106	0.0523178	0.597685	0.087534	1.83851e-26	693	152.118	540.882	90	62.6667	27.3333
Cd36_15260	orf19.2105	0.0729499	0.686943	0.106195	6.48739e-24	633	136.7	496.3	96	61.5	34.5
Cd36_15270	orf19.2104	0.0353577	0.526695	0.0671312	4.0832e-24	627	134.777	492.223	68	51	17
Cd36_15280	orf19.2103	1.13473	NA	NA	1.13413e-05	444	87.4731	356.527	281	72.5	208.5
Cd36_15290	orf19.2101	0.037399	0.392019	0.095401	1.53144e-16	597	131.015	465.985	57	40	17
Cd36_15300	orf19.2099	0.0463568	0.467	0.0992651	1.07021e-78	2721	600.279	2120.72	304	208.667	95.3333
Cd36_15310	orf19.2098	0.0123584	0.489918	0.0252254	6.69389e-69	1473	330.807	1142.19	133	119	14
Cd36_15320	orf19.2097	0.0474206	0.59722	0.0794022	6.48246e-121	3252	698.641	2553.36	405	287.667	117.333
Cd36_15330	orf19.2095	0.0197617	0.520507	0.0379662	2.87917e-91	2091	450.278	1640.72	201	169	32
Cd36_15340	orf19.2094	0.066515	0.540081	0.123157	1.52356e-83	3006	649.392	2356.61	400	250	150
Cd36_15350	orf19.2093	0.0545249	0.468239	0.116447	1.60686e-49	1869	404.846	1464.15	218	141	77
Cd36_15360	orf19.2092	0.0138988	0.44539	0.0312059	1.51442e-50	1212	267.974	944.026	103	90	13
Cd36_15370	orf19.2091	0.00527553	0.35725	0.0147671	5.68233e-29	729	158.335	570.665	48	45	3
Cd36_15380	orf19.2090	0.0273551	0.506648	0.0539923	3.72066e-142	3711	788.683	2922.32	369	290.5	78.5
Cd36_15390	orf19.2089	0.0261237	0.536659	0.0486785	1.77202e-35	843	174.36	668.64	84	66.8333	17.1667
Cd36_15400	orf19.2088	0.0557137	0.488983	0.113938	2.31179e-21	741	151.246	589.754	86	54.3333	31.6667
Cd36_15410	orf19.2087	0.0463642	0.405064	0.114462	3.11156e-26	1053	230.05	822.95	109	72	37
Cd36_15420	orf19.2084	0.0176927	0.430244	0.0411223	2.08011e-69	1791	418.442	1372.56	161	137	24
Cd36_15430	orf19.2082	0.0637852	0.485277	0.131441	5.19833e-34	1305	291.069	1013.93	166	104	62
Cd36_15440	orf19.2081	0.0420914	0.551778	0.0762833	1.73686e-136	3783	826.882	2956.12	444	323	121
Cd36_15450	orf19.2079	0.0186798	0.502616	0.0371652	1.97506e-15	342	70.9844	271.016	31	26	5
Cd36_15460	orf19.2078	0.0712445	0.679883	0.104789	6.03647e-69	1992	407.858	1584.14	290	182.333	107.667
Cd36_15470	orf19.2077	0.0570025	0.525964	0.108377	1.51319e-74	2502	540.508	1961.49	312	204.333	107.667
Cd36_15480	orf19.2076	0.044804	0.613833	0.0729905	3.29285e-40	1002	208.75	793.25	122	87.5	34.5
Cd36_15490	orf19.2075	0.0289316	0.513279	0.0563662	4.10374e-53	1353	295.942	1057.06	140	110	30
Cd36_15500	orf19.2073	0.0167779	0.556479	0.0301501	2.23766e-91	1830	413.623	1416.38	186	162.5	23.5
Cd36_15510	orf19.2072	0.016583	0.442954	0.0374373	8.61237e-70	1707	396.106	1310.89	154	132.5	21.5
Cd36_15520	orf19.2071	0.147492	0.63794	0.2312	1.6575e-09	474	93.1041	380.896	91	40	51
Cd36_15530	orf19.2070	0.0510945	0.492772	0.103688	4.40788e-51	1704	377.898	1326.1	202	136.5	65.5
Cd36_15540	orf19.2069	0.0199329	0.477508	0.0417435	1.14278e-64	1542	355.78	1186.22	149	125.667	23.3333
Cd36_15550	orf19.2068	0.065116	0.590302	0.11031	6.78657e-49	1578	319.369	1258.63	209	130.5	78.5
Cd36_15560	orf19.2067	0.0143545	0.400162	0.0358718	2.43028e-26	711	148.334	562.666	54	46	8
Cd36_15570	orf19.2066	0.0473382	0.478478	0.0989351	3.67187e-29	957	204.96	752.04	107	72.5	34.5
Cd36_15580	orf19.2065	0.0190042	0.502438	0.0378241	5.56004e-45	1026	226.66	799.34	98	83	15
Cd36_15590	orf19.2064	0.0297882	0.543565	0.0548015	3.97178e-136	3321	735.775	2585.23	360	284.5	75.5
Cd36_15600	orf19.2063	0.043125	0.57296	0.0752671	1.56435e-128	3453	750.69	2702.31	414	300.75	113.25
Cd36_15610	orf19.2062	0.0232289	0.332283	0.0699067	4.15705e-20	696	171.36	524.64	58	46	12
Cd36_15620	orf19.2060	0.0789508	0.468621	0.168475	4.73056e-16	684	163.565	520.435	96	57	39
Cd36_15630	orf19.2059	0.0535496	0.534428	0.1002	2.59456e-30	909	202.766	706.234	114	77.5	36.5
Cd36_15640	orf19.2057	0.012918	0.506778	0.0254904	5.45705e-119	2538	546.957	1991.04	227	201.5	25.5
Cd36_15650	orf19.2055	0.0550903	0.518476	0.106254	1.48376e-38	1308	269.387	1038.61	156	100.833	55.1667
Cd36_15660	orf19.2054	0.0419202	0.485616	0.0863237	3.47296e-50	1554	339.878	1214.12	171	121.5	49.5
Cd36_15670	orf19.2051	0.137303	0.528332	0.259881	2.5393e-43	2868	643	2225	523	243.833	279.167
Cd36_15680	orf19.2050	0.018089	0.609569	0.029675	5.40892e-82	1620	333.113	1286.89	162	139	23
Cd36_15690	orf19.2049	0.069683	0.485461	0.14354	1.45828e-21	852	183.268	668.732	110	65.5	44.5
Cd36_15700	orf19.2048	0.072827	0.442225	0.164683	2.44435e-08	363	74.8274	288.173	45	25	20
Cd36_15710	orf19.2047	0.0399939	0.476264	0.0839742	9.5729e-21	624	136.149	487.851	67	48	19
Cd36_15720	orf19.2046	0.0308174	0.445738	0.0691378	5.91807e-41	1179	279.228	899.772	121	93.8333	27.1667
Cd36_15730	orf19.2045	0.0200403	0.370186	0.0541356	1.19256e-32	1035	225.894	809.106	82	66	16
Cd36_15740	orf19.2044	0.16173	0.471492	0.343017	3.56517e-15	1455	324.268	1130.73	278	113.5	164.5
Cd36_15750	orf19.2043	0.0305294	0.489942	0.0623123	2.74102e-35	900	206.4	693.6	95	74.25	20.75
Cd36_15760	orf19.2042	0.0395031	0.567014	0.0696688	6.37709e-60	1497	340.58	1156.42	180	135.5	44.5
Cd36_15770	orf19.2041	0.0678644	0.559371	0.121323	2.88232e-55	1893	413.45	1479.55	259	163	96
Cd36_15780	orf19.2040	0.0432016	0.481758	0.089675	7.35738e-55	1767	385.42	1381.58	195	137	58
Cd36_15790	orf19.2039	0.0152792	0.444879	0.0343445	4.4747e-53	1338	280.119	1057.88	110	94	16
Cd36_15800	orf19.2038	0.0455288	0.553717	0.0822239	1.69403e-43	1254	257.948	996.052	145	101	44
Cd36_15810	orf19.2037	0.0460593	0.349821	0.131665	2.10926e-09	444	85.8458	358.154	40	24	16
Cd36_15830	orf19.2035	0.0988984	0.37019	0.267156	1.84244e-11	954	198.511	755.489	128	58	70
Cd36_15840	orf19.2034	0.100432	0.500005	0.200861	4.91816e-14	681	140.206	540.794	102	51.1667	50.8333
Cd36_15850	orf19.2033	0.123795	0.370035	0.33455	5.5571e-07	681	142.084	538.916	103	41.5	61.5
Cd36_15860	orf19.2032	0.0353084	0.301151	0.117245	1.84378e-13	663	141.111	521.889	53	35	18
Cd36_15870	orf19.2031	0.00571929	0.406534	0.0140684	1.07492e-27	654	127.457	526.543	43	40	3
Cd36_15880	orf19.2030	0.0332436	0.35756	0.0929735	1.49058e-12	471	101.969	369.031	41	29	12
Cd36_15890	orf19.2029	0.0214054	0.412957	0.0518344	2.60965e-37	1086	233.033	852.967	92	74	18
Cd36_15900	orf19.2028	0.00697156	0.427861	0.016294	1.4321e-25	555	122.677	432.323	43	40	3
Cd36_15910	orf19.2026	0.0270409	0.541618	0.0499261	1.90006e-86	2100	443.324	1656.68	215	171	44
Cd36_15920	orf19.2023	0.0314463	0.358925	0.0876124	1.98363e-42	1638	371.608	1266.39	145	106	39
Cd36_15930	orf19.2021	0.0446526	0.600195	0.0743967	4.57035e-66	1635	368.159	1266.84	207	152.083	54.9167
Cd36_15940	orf19.2020	0.0213798	0.375426	0.056948	1.45953e-51	1650	369.04	1280.96	136	109	27
Cd36_15950	orf19.2019	0.0080596	0.272564	0.0295696	1.03995e-18	639	140.026	498.974	36	32	4
Cd36_15970	orf19.2018	0.0317882	0.381833	0.0832516	6.83153e-13	447	93.5743	353.426	39	28	11
Cd36_15980	orf19.2017	0.0154981	0.323646	0.047886	4.69319e-35	1179	266.298	912.702	84	70	14
Cd36_15990	orf19.2016	0.0093204	0.217276	0.0428966	9.89944e-10	414	90.1213	323.879	20	17	3
Cd36_16000	orf19.2014	0.027282	0.345477	0.0789691	1.97502e-36	1371	301.018	1069.98	112	83.3333	28.6667
Cd36_16010	orf19.2013	0.00456879	0.247743	0.0184417	3.54896e-58	2055	463.31	1591.69	105	97.75	7.25
Cd36_16020	orf19.2012	0.0481732	0.558964	0.086183	1.89413e-76	2232	474.558	1757.44	269	187	82
Cd36_16030	orf19.2010	0.0954997	0.622244	0.153476	4.05639e-12	393	86.3187	306.681	64	36.5	27.5
Cd36_16040	orf19.2009	0.0308355	0.460179	0.0670077	1.26778e-46	1386	293.656	1092.34	134	101	33
Cd36_16050	orf19.2008	0.0346765	0.340275	0.101907	7.68855e-29	1248	274.178	973.822	108	75	33
Cd36_16060	orf19.2007	0.0323711	0.40601	0.0797298	4.99179e-84	2901	638.967	2262.03	272	200.333	71.6667
Cd36_16070	orf19.2006	0.0632142	0.550749	0.114779	6.98872e-26	888	170.456	717.544	110	66.5	43.5
Cd36_16080	orf19.2005	0.0510189	0.356092	0.143275	1.13118e-56	2931	646.706	2284.29	296	183.333	112.667
Cd36_16090	orf19.2003	0.0192203	0.294575	0.0652475	3.27047e-41	1614	375.6	1238.4	115	91.5	23.5
Cd36_16100	orf19.2002	0.0300558	0.411845	0.0729786	1.55988e-84	2880	605.852	2274.15	259	192	67
Cd36_16110	orf19.2001	0.0492942	0.412722	0.119437	1.38816e-17	714	148.071	565.929	74	47	27
Cd36_16120	orf19.2000	0.048379	0.41472	0.116655	4.86711e-58	2457	511.144	1945.86	254	162.833	91.1667
Cd36_16130	orf19.1999	0.493693	0.559469	0.882432	0.608794	399	82.4266	316.573	147	32.5	114.5
Cd36_16140	orf19.1998	0.0692464	0.508868	0.136079	2.70867e-53	2115	452.007	1662.99	277	167	110
Cd36_16150	orf19.1996	0.0486804	0.289995	0.167866	3.88128e-17	1056	233.879	822.121	95	56.25	38.75
Cd36_16160	orf19.1995	0.0584322	0.34382	0.16995	1.44023e-34	2118	436.923	1681.08	215	120.5	94.5
Cd36_16170	orf19.1994	0.0468139	0.404658	0.115688	2.28427e-45	1983	396.496	1586.5	196	124	72
Cd36_16180	orf19.1993	0.076919	0.27938	0.27532	3.05645e-11	1173	232.587	940.413	123	54.25	68.75
Cd36_16190	orf19.1992	0.0933869	0.456476	0.204582	2.64276e-26	1452	320.728	1131.27	209	109.667	99.3333
Cd36_16200	orf19.1991	0.0337907	0.385544	0.0876443	9.53989e-44	1680	348.314	1331.69	149	105	44
Cd36_16210	orf19.1990	0.059954	0.61616	0.0973028	3.03065e-62	1809	377.213	1431.79	241	158.5	82.5
Cd36_16220	orf19.1989	0.0171986	0.464714	0.0370089	7.89267e-56	1356	297.355	1058.65	121	103	18
Cd36_16230	orf19.1441	0.0843766	0.629294	0.134081	5.48172e-49	1776	347.49	1428.51	262	148	114
Cd36_16240	orf19.1442	0.0654083	0.623447	0.104914	3.39166e-70	2043	449.168	1593.83	290	190.167	99.8333
Cd36_16250	orf19.1444	0.0210506	0.354539	0.0593745	3.91423e-44	1530	325.64	1204.36	117	92	25
Cd36_16260	orf19.1445	0.0724056	0.587789	0.123183	9.12103e-77	2685	551.572	2133.43	372	224.75	147.25
Cd36_16270	orf19.1446	0.0257395	0.407203	0.0632105	5.93114e-46	1458	311.883	1146.12	127	98	29
Cd36_16290	orf19.1447	0.0980526	0.47242	0.207554	1.17464e-27	1593	330.943	1262.06	232	116	116
Cd36_16300	orf19.1448	NA	0.416507	0	NA	564	122.03	441.97	39	39	NA
Cd36_16310	orf19.1449	0.0466867	0.620378	0.0752552	2.60754e-28	687	145.722	541.278	86	61.5	24.5
Cd36_16320	orf19.1450	0.113689	0.563894	0.201615	1.49914e-22	1104	228.735	875.265	183	90.6667	92.3333
Cd36_16330	orf19.1451	0.0590593	0.656747	0.0899269	5.75032e-182	4965	1053.19	3911.81	683	460.833	222.167
Cd36_16340	orf19.1453	0.0359329	0.502423	0.0715193	3.61834e-99	2820	625.377	2194.62	306	229	77
Cd36_16350	orf19.1456	0.984743	NA	NA	2.18192e-05	432	98.9641	333.036	260	77.4167	182.583
Cd36_16360	orf19.1458	0.0516768	0.618491	0.083553	2.4402e-30	807	166.188	640.812	102	70	32
Cd36_16370	orf19.1459	0.022942	0.532369	0.0430942	2.48419e-47	1077	236.095	840.905	109	90	19
Cd36_16380	orf19.1460	0.00866511	0.512912	0.0168939	2.36072e-108	2142	458.938	1683.06	185	170.5	14.5
Cd36_16390	orf19.1461	0.0182736	0.427883	0.0427069	2.88504e-44	1167	253.011	913.989	99	82.5	16.5
Cd36_16400	orf19.1462	0.0299041	0.547481	0.0546212	1.92947e-93	2331	488.986	1842.01	244	190	54
Cd36_16410	orf19.1464	0.073109	0.590507	0.123807	2.21682e-54	1833	390.252	1442.75	260	159.5	100.5
Cd36_16420	orf19.1465	0.0368526	0.53743	0.0685719	2.29673e-21	537	119.891	417.109	61	46	15
Cd36_16430	orf19.1466	0.0432988	0.583538	0.0742006	1.10342e-26	711	140.559	570.441	81	57	24
Cd36_16440	orf19.1467	0.0221272	0.299678	0.0738364	4.17352e-10	402	80.9571	321.043	27	20	7
Cd36_16450	orf19.1468	0.0174454	0.574533	0.0303644	5.9517e-75	1557	310.192	1246.81	146	124.5	21.5
Cd36_16470	orf19.1470	NA	0.050111	0	NA	357	82.5191	274.481	4	4	NA
Cd36_16480	orf19.1471	0.0139633	0.221314	0.0630928	2.35441e-10	471	109.575	361.425	26	21	5
Cd36_16490	orf19.1473	0.0474262	0.551122	0.086054	7.21089e-39	1092	243.397	848.603	134	95	39
Cd36_16500	orf19.1474	0.0309328	0.390113	0.0792919	5.60506e-106	3729	858.054	2870.95	348	261	87
Cd36_16510	orf19.1476	0.0501168	0.406	0.12344	5.64169e-37	1617	338.095	1278.9	168	106	62
Cd36_16520	orf19.1477	0.0202083	0.378012	0.0534592	4.88027e-19	576	124.61	451.39	46	37	9
Cd36_16530	orf19.1478	0.0164539	0.356865	0.0461067	5.37108e-72	2253	501.816	1751.18	171	142.5	28.5
Cd36_16540	orf19.1479	0.0601833	0.591385	0.101767	3.01696e-74	2265	483.977	1781.02	301	198	103
Cd36_16550	orf19.1480	0.0403607	0.209546	0.19261	2.21189e-07	528	127.175	400.825	39	23.25	15.75
Cd36_16560	orf19.1481	0.110276	0.429269	0.256891	1.07856e-32	2421	538.209	1882.79	369	175.917	193.083
Cd36_16570	orf19.1482	0.0203698	0.341949	0.0595696	5.21885e-10	318	69.1897	248.81	24	19	5
Cd36_16580	orf19.1483	0.0627666	0.42671	0.147094	5.09938e-09	393	69.1438	323.856	42	22.5	19.5
Cd36_16590	orf19.1484	0.0802626	0.229296	0.35004	8.72102e-05	741	136.668	604.332	73	27	46
Cd36_16600	orf19.1485	0.0825731	0.343799	0.240179	5.13609e-05	339	68.2916	270.708	40	18.8333	21.1667
Cd36_16610	orf19.1486	0.0607952	0.394041	0.154287	1.65708e-10	495	101.14	393.86	54	31	23
Cd36_16630	orf19.1488	0.12678	0.37136	0.341392	5.20841e-06	624	126.043	497.957	95	36.9167	58.0833
Cd36_16640	orf19.1490	0.10825	0.343095	0.31551	1.86258e-38	3933	1028.75	2904.25	576	283.25	292.75
Cd36_16650	orf19.1491	0.0991902	0.327475	0.302894	1.48519e-16	1827	366.82	1460.18	233	97.3333	135.667
Cd36_16660	orf19.1492	0.0648401	0.369305	0.175573	2.58708e-29	1848	349.467	1498.53	195	101.917	93.0833
Cd36_16670	orf19.1493	0.0412117	0.386209	0.106708	2.97118e-46	1932	410.8	1521.2	185	124	61
Cd36_16680	orf19.1494	0.125201	0.275933	0.453737	2.08271e-06	1242	292.377	949.623	177	67.5	109.5
Cd36_16690	orf19.1495	0.114448	0.388428	0.294645	6.16021e-09	774	161.623	612.377	114	49	65
Cd36_16700	orf19.1497	0.118518	0.344924	0.343605	4.26769e-09	1053	219.116	833.884	152	60.5833	91.4167
Cd36_16710	orf19.1499	0.0574974	0.335001	0.171634	2.75003e-53	3285	726.977	2558.02	338	196.417	141.583
Cd36_16720	orf19.1500	0.162312	0.396072	0.409804	1.07299e-08	1320	249.427	1070.57	233	76.75	156.25
Cd36_16730	orf19.1502	0.09505	0.271514	0.350074	1.73256e-05	699	134.257	564.743	81	30.5833	50.4167
Cd36_16740	orf19.1504	0.0937656	0.34026	0.27557	5.29305e-25	2454	505.419	1948.58	310	138.25	171.75
Cd36_16750	orf19.1505	0.115244	0.358756	0.321231	1.12221e-09	999	197.854	801.146	142	56.4167	85.5833
Cd36_16760	orf19.1507	0.098719	0.337858	0.292191	2.84889e-18	1932	386.02	1545.98	248	105	143
Cd36_16770	orf19.1509	0.0747993	0.305882	0.244536	2.63327e-30	2661	603.135	2057.87	298	151.5	146.5
Cd36_16780	orf19.1510	0.0453669	0.321587	0.141072	3.30943e-33	1755	403.405	1351.6	165	105.5	59.5
Cd36_16790	orf19.1513	0.0449689	0.565958	0.0794562	1.2112e-277	7812	1673.78	6138.22	933	665.083	267.917
Cd36_16800	orf19.1514	0.016228	0.471085	0.0344482	1.87074e-44	1020	220.601	799.399	90	77.1667	12.8333
Cd36_16810	orf19.1515	0.0463662	0.637548	0.0727258	2.35866e-47	1164	241.001	922.999	145	103.5	41.5
Cd36_16820	orf19.1516	0.0232724	0.635802	0.0366033	1.29496e-116	2364	487.507	1876.49	252	209	43
Cd36_16830	orf19.1517	0.03842	0.345946	0.111058	1.74921e-25	1107	252.586	854.414	102	70	32
Cd36_16840	orf19.1519	0.102994	0.596859	0.17256	3.01795e-76	3273	697.703	2575.3	535	287.167	247.833
Cd36_16850	orf19.1522	0.116465	0.556111	0.209428	7.79758e-60	3111	686.073	2424.93	531	269.417	261.583
Cd36_16860	orf19.1523	0.0262353	0.438943	0.0597692	7.22079e-57	1656	356.629	1299.37	152	118.5	33.5
Cd36_16870	orf19.1524	0.130572	0.598387	0.218207	4.32023e-28	1467	305.013	1161.99	265	125.75	139.25
Cd36_16880	orf19.1525	0.0441781	0.464597	0.0950891	7.04734e-35	1188	243.991	944.009	125	84.5	40.5
Cd36_16890	orf19.1526	0.0318484	0.527671	0.0603566	8.5029e-188	4983	1054.41	3928.59	522	399.5	122.5
Cd36_16900	orf19.1527	0.0582068	0.395097	0.147323	2.573e-12	549	120.47	428.53	61	37	24
Cd36_16910	orf19.1528	0.125936	0.355808	0.353944	4.92502e-09	1053	220.605	832.395	159	62.5	96.5
Cd36_16920	orf19.1529	0.155181	0.310435	0.499883	0.000151914	990	212.426	777.574	163	54	109
Cd36_16930	orf19.1531	0.106431	0.361662	0.294282	2.32326e-22	2319	462.931	1856.07	317	132.833	184.167
Cd36_16940	orf19.1532	0.151299	0.452115	0.334648	1.75102e-10	1056	199.038	856.962	185	67.5833	117.417
Cd36_16950	orf19.1533	0.0803493	0.441497	0.181993	1.10284e-25	1374	284.689	1089.31	178	95	83
Cd36_16960	orf19.1534	0.166721	0.423121	0.394027	7.82062e-13	1761	355.112	1405.89	325	114.833	210.167
Cd36_16970	orf19.1535	0.128575	0.250035	0.514228	0.00230314	705	155.593	549.407	98	33.0833	64.9167
Cd36_16990	orf19.1536	0.0891113	0.394936	0.225635	4.46339e-21	1404	305.069	1098.93	186	93.6667	92.3333
Cd36_17000	orf19.1538	0.139548	0.440479	0.316808	1.10544e-12	1215	234.641	980.359	203	78.1667	124.833
Cd36_17010	orf19.1539	0.163939	0.460603	0.355922	4.25034e-11	1155	243.339	911.661	218	83.75	134.25
Cd36_17020	orf19.1541	0.105942	0.231918	0.456811	8.87118e-11	2796	623.264	2172.74	339	124.333	214.667
Cd36_17030	orf19.1542	0.226527	0.452077	0.501081	8.24441e-09	1716	385.337	1330.66	391	130.833	260.167
Cd36_17040	orf19.1543	0.0528182	0.362211	0.145822	1.31058e-26	1287	293.56	993.44	135	84.3333	50.6667
Cd36_17050	orf19.1580	0.217214	0.607184	0.35774	4.15731e-21	2010	425.861	1584.14	476	177.25	298.75
Cd36_17060	orf19.1578	0.0324603	0.323231	0.100425	1.79829e-108	5136	1091.04	4044.96	415	286.5	128.5
Cd36_17070	orf19.1577	0.092028	0.481285	0.191213	3.49493e-24	1236	264.165	971.835	178	93.8333	84.1667
Cd36_17080	orf19.1576	0.0511916	0.406343	0.125981	9.1651e-42	1812	387.287	1424.71	192	121.5	70.5
Cd36_17090	orf19.1575	0.00269549	0.414489	0.00650317	2.68322e-46	960	216.686	743.314	71	69	2
Cd36_17100	orf19.1574	0.0575379	0.544922	0.105589	4.31035e-52	1713	358.873	1354.13	214	139	75
Cd36_17110	orf19.1573	0.0209776	0.494502	0.0424216	2.41979e-165	4041	882.803	3158.2	385	319.667	65.3333
Cd36_17120	orf19.1571	0.0565655	0.47752	0.118457	6.15796e-23	777	189.683	587.317	99	67	32
Cd36_17130	orf19.1570	0.017394	0.461925	0.0376556	4.92434e-88	2184	468.274	1715.73	191	161.5	29.5
Cd36_17140	orf19.1569	0.0219639	0.511681	0.042925	7.62515e-146	3507	750.451	2756.55	338	278.333	59.6667
Cd36_17150	orf19.1567	0.0324006	0.524731	0.0617471	8.96079e-116	3099	647.145	2451.86	322	244.25	77.75
Cd36_17160	orf19.1566	0.0261364	0.506991	0.051552	6.19412e-114	2826	645.845	2180.16	294	238	56
Cd36_17170	orf19.1565	0.0192665	0.540671	0.0356344	2.12303e-84	1839	393.239	1445.76	179	151.5	27.5
Cd36_17180	orf19.1564	0.0172741	0.411814	0.0419462	2.02405e-22	567	127.804	439.196	48	40.5	7.5
Cd36_17190	orf19.1563	0.0491697	0.552949	0.0889226	4.31062e-59	1638	384.303	1253.7	210	150.333	59.6667
Cd36_17200	orf19.1562	0.0745839	0.261556	0.285155	1.7889e-05	531	115.48	415.52	55	25.5	29.5
Cd36_17210	orf19.1560	0.0198672	0.430457	0.0461537	8.69582e-58	1614	338.905	1275.09	136	111	25
Cd36_17220	orf19.1559	0.00835253	0.391915	0.0213121	3.48026e-45	1095	252.255	842.745	84	77	7
Cd36_17230	orf19.1557	0.0985894	0.698167	0.141212	7.7359e-26	840	177.911	662.089	142	80.8333	61.1667
Cd36_17240	orf19.1555	0.0776367	0.580512	0.133738	3.71939e-100	3624	780.067	2843.93	525	315.25	209.75
Cd36_17250	orf19.1553	0.052568	0.529095	0.0993546	5.82365e-43	1311	293.3	1017.7	163	111.333	51.6667
Cd36_17260	orf19.1551	1.35685	1.98537	0.683428	0.171766	471	109.18	361.82	303	76.0833	226.917
Cd36_17270	orf19.1549	0.00337853	0.403209	0.00837912	3.07334e-33	744	150.692	593.308	49	47	2
Cd36_17280	orf19.1548	0.0863628	0.503317	0.171587	1.98618e-16	708	148.194	559.806	100	54.3333	45.6667
Cd36_17290	orf19.1547	0.118501	0.624094	0.189877	9.4229e-19	792	169.358	622.642	140	71.75	68.25
Cd36_17300	orf19.1546	0.0306745	0.572591	0.0535713	1.16756e-36	876	177.296	698.704	92	71	21
Cd36_17310	orf19.1545	NA	0.546544	0	NA	465	103.064	361.936	40	40	NA
Cd36_17320	orf19.1544	0.0606176	0.506764	0.119617	5.19351e-21	741	154.273	586.727	91	56.8333	34.1667
Cd36_17330	orf19.1582	0.0187971	0.480999	0.0390792	5.04792e-69	1659	366.138	1292.86	154	130	24
Cd36_17370	orf19.1584	0.0243079	0.529525	0.0459052	4.75167e-67	1530	352.377	1177.62	162	133.833	28.1667
Cd36_17380	orf19.1585	0.0164129	0.529073	0.0310219	6.38137e-53	1110	247.643	862.357	108	94	14
Cd36_17390	orf19.1586	0.0115001	0.427883	0.0268768	3.58208e-36	885	184.008	700.992	68	60	8
Cd36_17400	orf19.1587	0.0537404	0.508493	0.105686	1.02469e-46	1509	352.043	1156.96	190	130	60
Cd36_17410	orf19.1588	0.0482917	0.549541	0.0878765	6.5026e-15	408	87.2801	320.72	49	34	15
Cd36_17420	orf19.1589	0.0611986	0.64249	0.0952523	3.94814e-48	1311	281.534	1029.47	182	121.5	60.5
Cd36_17430	orf19.5809	0.0196981	0.423192	0.0465465	2.08335e-50	1359	304.565	1054.44	119	98.5	20.5
Cd36_17440	orf19.5811	0.0586816	0.609588	0.0962645	3.32095e-61	1671	395.414	1275.59	237	165	72
Cd36_17440	orf19.5811	0.0586816	0.609588	0.0962645	3.32095e-61	1671	395.414	1275.59	237	165	72
Cd36_17450	orf19.5812	0.0471645	0.418838	0.112608	2.41391e-31	1254	253.171	1000.83	127	81.25	45.75
Cd36_17460	orf19.5813	0.0382441	0.502501	0.0761075	3.78508e-20	552	122.877	429.123	61	45	16
Cd36_17470	orf19.5814	0.0599097	0.310273	0.193087	2.89524e-06	342	72.8062	269.194	34	18.5	15.5
Cd36_17480	orf19.5815	0.0342752	0.542178	0.0632175	8.99221e-84	2154	467.623	1686.38	237	180.5	56.5
Cd36_17490	orf19.5816	0.028803	0.568695	0.0506475	2.76248e-51	1176	255.87	920.13	128	102	26
Cd36_17500	orf19.5817	0.0191141	0.36587	0.052243	3.53386e-19	573	122.612	450.388	44	35.5	8.5
Cd36_17510	orf19.5818	0.0275062	0.387647	0.0709569	9.674e-30	1026	211.425	814.575	86	64	22
Cd36_17520	orf19.5820	0.0377238	0.73621	0.0512405	6.97573e-86	1632	381.687	1250.31	225	179	46
Cd36_17530	orf19.5821	0.050968	0.606179	0.0840809	3.72358e-127	3567	729.172	2837.83	443	303.167	139.833
Cd36_17540	orf19.5823	0.0316447	0.424513	0.0745435	2.57113e-32	1032	225.195	806.805	98	73	25
Cd36_17550	orf19.5824	0.0756909	0.386315	0.195931	6.10643e-18	1050	223.574	826.426	127	67.5	59.5
Cd36_17560	orf19.5825	0.0143236	0.376552	0.0380388	3.6925e-16	447	94.5811	352.419	33	28	5
Cd36_17570	orf19.5825.1	0.0135104	0.281325	0.0480242	7.29897e-10	288	63.9429	224.057	18	15	3
Cd36_17580	orf19.5826	0.0161461	0.63041	0.0256121	2.30767e-92	1632	379.93	1252.07	182	162	20
Cd36_17590	orf19.5827	0.012434	0.451773	0.0275227	2.4535e-41	942	212.162	729.838	81	72	9
Cd36_17600	orf19.5828	0.0952446	0.550044	0.173158	1.67942e-48	2127	468.626	1658.37	331	182.667	148.333
Cd36_17610	orf19.5830	0.0537615	0.637359	0.0843503	1.0743e-104	2796	590.582	2205.42	368	253.583	114.417
Cd36_17620	orf19.5831	0.148101	0.651708	0.22725	7.97499e-26	1299	287.057	1011.94	261	125	136
Cd36_17630	orf19.5832	0.00896062	0.453062	0.0197779	5.6435e-30	639	133.797	505.203	50	45.5	4.5
Cd36_17640	orf19.5833	0.0287045	0.47243	0.0607592	1.72619e-39	1089	236.792	852.208	107	83	24
Cd36_17650	orf19.5834	0.0232394	0.563992	0.0412051	2.06763e-133	3006	624.323	2381.68	302	247.5	54.5
Cd36_17660	orf19.5835	0.0182635	0.427512	0.0427205	4.28071e-31	840	174.92	665.08	69	57	12
Cd36_17670	orf19.5837	0.0390293	0.506325	0.0770835	6.52229e-32	891	194.203	696.797	98	71.5	26.5
Cd36_17680	orf19.5838	0.0291604	0.62582	0.0465955	1.6547e-43	903	194.978	708.022	103	82.75	20.25
Cd36_17690	orf19.5839	0.0291747	0.505451	0.05772	4.49127e-42	1086	229.791	856.209	109	84.5	24.5
Cd36_17700	orf19.5840	0.961854	2.61838	0.367347	0.000784161	480	96.3807	383.619	278	70.0833	207.917
Cd36_17720	orf19.5809	0.0187251	0.434827	0.0430634	1.61616e-52	1359	304.565	1054.44	120	100.5	19.5
Cd36_17730	orf19.5808	0.0781806	0.489491	0.159718	2.02998e-28	1218	268.425	949.575	167	96.5	70.5
Cd36_17740	orf19.5806	0.0127046	0.321654	0.0394978	2.62409e-47	1497	345.991	1151.01	105	90.5	14.5
Cd36_17750	orf19.5805	0.0281393	0.533582	0.0527366	2.00494e-73	1752	394.187	1357.81	188	150.5	37.5
Cd36_17760	orf19.5804	0.022986	0.569134	0.0403877	7.8631e-184	3909	905.113	3003.89	429	361	68
Cd36_17770	orf19.5802	0.0611459	0.64238	0.0951864	1.75677e-37	1038	212.042	825.958	140	91.5	48.5
Cd36_17780	orf19.5801	0.00762186	0.379833	0.0200663	3.61814e-48	1239	249.98	989.02	82	74.5	7.5
Cd36_17790	orf19.5799	0.034104	0.538786	0.0632978	4.32405e-81	2058	468.33	1589.67	233	180	53
Cd36_17800	orf19.5798	0.0280161	0.633041	0.0442564	1.42351e-132	2784	596.064	2187.94	315	254.833	60.1667
Cd36_17810	orf19.5797	0.0173067	0.382399	0.0452583	1.4569e-29	885	183.598	701.402	67	55	12
Cd36_17820	orf19.5796	0.0305215	0.448275	0.0680866	3.00612e-51	1569	331.907	1237.09	149	112	37
Cd36_17830	orf19.5793	0.00105141	0.28147	0.00373542	3.44481e-44	1233	281.229	951.771	67	66	1
Cd36_17840	orf19.5792	0.0484765	0.520558	0.093124	5.46571e-48	1494	322.367	1171.63	176	121	55
Cd36_17850	orf19.5791	0.00953288	0.240498	0.039638	1.10597e-27	1107	262.455	844.545	62	54	8
Cd36_17860	orf19.5789	0.0227267	0.370262	0.0613801	9.06445e-22	666	152.283	513.717	56	44.5	11.5
Cd36_17870	orf19.5788	0.0020732	0.133	0.0155879	1.48144e-42	2490	557.949	1932.05	72	68	4
Cd36_17880	orf19.5785	0.0929607	0.528848	0.17578	6.5848e-20	876	189.74	686.26	132	72	60
Cd36_17890	orf19.5784	0.0148867	0.454721	0.032738	2.0998e-88	2127	464.844	1662.16	183	158.5	24.5
Cd36_17900	orf19.5783	0.0271775	0.651342	0.0417254	2.23913e-31	618	130.944	487.056	70	57	13
Cd36_17910	orf19.5782	0.055397	0.59293	0.0934292	4.88242e-78	2238	483.962	1754.04	292	198.333	93.6667
Cd36_17920	orf19.5780	0.0429533	0.510209	0.0841877	1.36989e-68	2019	461.983	1557.02	236	171	65
Cd36_17930	orf19.5779	0.00900628	0.361045	0.0249451	5.1121e-92	2562	551.371	2010.63	176	158	18
Cd36_17940	orf19.5777	0.00537839	0.611937	0.00878913	1.05245e-43	708	148.21	559.79	65	62	3
Cd36_17950	orf19.5776	0.0496957	0.562438	0.0883577	4.25608e-319	9615	2024.28	7590.72	1166	801	365
Cd36_17960	orf19.910	0.0561965	0.645836	0.0870136	2.82017e-50	1338	275.993	1062.01	177	119.5	57.5
Cd36_17970	orf19.909	0.0556227	0.459594	0.121026	6.92786e-30	1128	246.637	881.363	132	84.75	47.25
Cd36_17980	orf19.908	0.0164317	0.313188	0.0524658	3.67665e-25	876	199.201	676.799	62	51	11
Cd36_17990	orf19.906	0.0220763	0.450157	0.0490412	2.75499e-149	4107	889.276	3217.72	371	301	70
Cd36_18000	orf19.905	0.0251474	0.507579	0.0495439	2.2766e-55	1320	309.103	1010.9	139	114	25
Cd36_18010	orf19.904	0.0369156	0.507202	0.0727827	6.46313e-26	699	143.781	555.219	73	53	20
Cd36_18020	orf19.903	0.0105223	0.171297	0.0614273	1.06855e-12	744	169.775	574.225	32	26	6
Cd36_18030	orf19.900	0.100639	0.513765	0.195886	1.18265e-42	2139	480.813	1658.19	335	178.833	156.167
Cd36_18040	orf19.899	0.0269243	0.554145	0.0485871	3.29778e-38	846	190.595	655.405	92	74.6667	17.3333
Cd36_18050	orf19.898	0.0101787	0.408652	0.024908	2.52293e-42	1023	231.701	791.299	81	73	8
Cd36_18060	orf19.897	0.0675995	0.47182	0.143274	2.41645e-15	639	128.5	510.5	78	45	33
Cd36_18070	orf19.896	0.0841959	0.626109	0.134475	1.0317e-209	7395	1591.95	5803.05	1138	675.833	462.167
Cd36_18080	orf19.895	0.0113392	0.528932	0.0214379	1.23891e-56	1131	242.419	888.581	102	92	10
Cd36_18090	orf19.894	0.0807351	0.629515	0.12825	9.49136e-52	1716	368.147	1347.85	260	156.833	103.167
Cd36_18100	orf19.893	0.0362283	0.376895	0.0961233	1.45223e-44	1659	396.062	1262.94	162	117.333	44.6667
Cd36_18110	orf19.891	0.0184818	0.646377	0.0285929	1.45964e-121	2331	468.594	1862.41	237	203	34
Cd36_18120	orf19.889	0.0801379	0.751985	0.106568	3.22545e-62	1644	361.19	1282.81	269	171.5	97.5
Cd36_18130	orf19.886	0.0635685	0.647024	0.0982474	7.60409e-150	4143	938.136	3204.86	602	406.667	195.333
Cd36_18140	orf19.882	0.0699741	0.574597	0.12178	4.44365e-61	2055	453.421	1601.58	289	182	107
Cd36_18150	orf19.881	0.0884247	0.612665	0.144328	5.29149e-47	1701	370.241	1330.76	266	155	111
Cd36_18160	orf19.880	0.0481564	0.572282	0.084148	3.46671e-109	3024	672.803	2351.2	379	269.333	109.667
Cd36_18170	orf19.879	0.0819324	0.689411	0.118844	3.32314e-77	2325	499.768	1825.23	367	225.333	141.667
Cd36_18180	orf19.878	0.0256381	0.396538	0.0646547	3.47843e-29	894	199.688	694.312	79	61.5	17.5
Cd36_18190	orf19.876	0.0738471	0.392476	0.188157	4.84028e-15	729	202.893	526.107	99	62	37
Cd36_18200	orf19.875	0.027695	0.482916	0.0573496	2.52514e-44	1209	252.763	956.237	116	90	26
Cd36_18210	orf19.874	0.0372132	0.43337	0.0858694	2.8211e-33	1101	242.535	858.465	111	79.8333	31.1667
Cd36_18220	orf19.873.1	0.0086045	0.143808	0.0598332	4.72593e-07	450	99.3416	350.658	16	13	3
Cd36_18230	orf19.872	0.0929579	0.419472	0.221607	5.4509e-20	1269	273.895	995.105	175	88	87
Cd36_18240	orf19.871	0.0442423	0.548169	0.0807092	8.81081e-106	3048	650.569	2397.43	356	253	103
Cd36_18250	orf19.868	0.0589749	0.527233	0.111857	3.14312e-48	1626	356.513	1269.49	207	135	72
Cd36_18260	orf19.867	0.0388506	0.445972	0.0871143	1.13613e-48	1608	349.025	1258.98	165	117.333	47.6667
Cd36_18270	orf19.866	0.0451527	0.590916	0.0764114	3.3354e-74	1920	421.459	1498.54	238	172.333	65.6667
Cd36_18280	orf19.864	0.0386811	0.573335	0.0674669	5.33385e-118	3096	642.455	2453.54	350	257.5	92.5
Cd36_18290	orf19.863	0.0390553	0.417327	0.0935845	2.9592e-31	1134	240.577	893.423	111	77	34
Cd36_18300	orf19.862	0.10894	0.566594	0.192271	2.01513e-15	708	145.856	562.144	115	58	57
Cd36_18310	orf19.861	0.091474	0.521392	0.175442	5.53612e-13	528	115.764	412.236	79	43.5	35.5
Cd36_18320	orf19.860	0.0809679	0.621263	0.130328	1.28972e-60	2082	440.317	1641.68	312	186	126
Cd36_18330	orf19.856	0.0258036	0.615147	0.041947	4.04085e-79	1656	354.981	1301.02	182	149	33
Cd36_18340	orf19.855	0.0105501	0.409563	0.0257595	1.65612e-31	747	174.277	572.723	61	55	6
Cd36_18350	orf19.854	0.0185101	0.498179	0.0371555	2.08107e-63	1470	321.428	1148.57	138	117	21
Cd36_18360	orf19.853	0.139689	0.668933	0.208823	1.72248e-24	1089	248.157	840.843	217	109.833	107.167
Cd36_18370	orf19.852	0.128501	0.443339	0.289849	3.54625e-14	1092	249.463	842.537	183	83.5	99.5
Cd36_18380	orf19.851	0.0624442	0.433162	0.144159	6.23977e-53	2502	501.956	2000.04	285	165.167	119.833
Cd36_18390	orf19.850	0.0581554	0.427882	0.135915	8.59945e-25	1086	219.277	866.723	120	71.5	48.5
Cd36_18400	orf19.849	0.0656367	0.504129	0.130198	5.08861e-62	2538	501.293	2036.71	312	184	128
Cd36_18410	orf19.848	0.0806196	0.462708	0.174234	8.93355e-08	297	68.0554	228.945	41	23.5	17.5
Cd36_18420	orf19.847	0.0514049	0.39669	0.129585	5.33185e-26	1086	243.993	842.007	117	75.1667	41.8333
Cd36_18430	orf19.846	0.0344572	0.479457	0.0718672	1.0926e-95	2853	611.16	2241.84	292	216.5	75.5
Cd36_18440	orf19.844	0.0156971	0.481475	0.0326021	1.6876e-105	2466	534.747	1931.25	220	190	30
Cd36_18450	orf19.843	0.036347	0.514389	0.0706605	4.2361e-77	2184	464.736	1719.26	234	173	61
Cd36_18460	orf19.842	0.0768602	0.447674	0.171688	1.20428e-07	342	68.2264	273.774	43	23	20
Cd36_18470	orf19.841	0.0188168	0.549524	0.0342421	2.24675e-96	2079	437.693	1641.31	201	170.5	30.5
Cd36_18480	orf19.840	0.0054544	0.0460316	0.118492	0.0089242	480	111.988	368.012	7	5	2
Cd36_18490	orf19.838.1	NA	0.0651697	0	NA	567	128.167	438.833	8	8	NA
Cd36_18500	orf19.839	0.0599633	0.548857	0.109251	2.58368e-58	1881	408.936	1472.06	244	159.167	84.8333
Cd36_18510	orf19.837	0.00864018	0.312657	0.0276347	4.11197e-15	447	97.7813	349.219	28	25	3
Cd36_18520	orf19.836.1	NA	0.269885	0	NA	222	48.5302	173.47	11	11	NA
Cd36_18530	orf19.836	0.0588797	0.603097	0.097629	1.50187e-38	1107	232.871	874.129	146	96.5	49.5
Cd36_18540	orf19.835	0.0555672	0.427455	0.129995	4.08926e-54	2337	502.562	1834.44	262	163.75	98.25
Cd36_18550	orf19.834	0.0394371	0.39081	0.100911	1.67343e-62	2502	536.786	1965.21	239	163.5	75.5
Cd36_18560	orf19.832	0.0263299	0.395346	0.0665997	1.71687e-91	3036	659.015	2376.98	264	202.5	61.5
Cd36_18570	orf19.831	0.115088	0.447807	0.257004	5.05333e-20	1470	291.382	1178.62	224	98.25	125.75
Cd36_18580	orf19.829	0.0228111	0.354079	0.0644237	5.09069e-66	2352	504.9	1847.1	184	142.5	41.5
Cd36_18600	orf19.828	0.0446634	0.446784	0.0999664	5.59272e-23	795	172.3	622.7	85	58	27
Cd36_18610	orf19.827.1	NA	0.13799	0	NA	297	71.406	225.594	9	9	NA
Cd36_18620	orf19.827	0.0301804	0.36817	0.0819742	4.36633e-18	648	140.922	507.078	56	41	15
Cd36_18630	orf19.826	0.0693793	0.51942	0.133571	3.42922e-47	1848	384.226	1463.77	241	144	97
Cd36_18640	orf19.825	0.00830657	0.393639	0.021102	1.87694e-44	1089	241.619	847.381	81	74	7
Cd36_18650	orf19.823	0.072011	0.620053	0.116137	1.02844e-18	570	118.513	451.487	81	50	31
Cd36_18660	orf19.822	0.017897	0.485904	0.0368324	5.82544e-24	567	114.643	452.357	49	41	8
Cd36_18670	orf19.820	0.02049	0.455506	0.044983	6.35364e-42	1119	228.47	890.53	96	78	18
Cd36_18680	orf19.819	0.0159566	0.159302	0.100166	3.49237e-05	330	76.6441	253.356	15	11	4
Cd36_18690	orf19.816	0.0538365	0.574615	0.0936914	5.19723e-179	5280	1163.84	4116.16	681	467.167	213.833
Cd36_18700	orf19.815	0.0192563	0.555047	0.0346931	7.29472e-268	5739	1259.18	4479.82	579	493.833	85.1667
Cd36_18710	orf19.814	0.0567393	0.525569	0.107958	8.34139e-80	2598	597.249	2000.75	335	225.667	109.333
Cd36_18720	orf19.813	0.0685948	0.461216	0.148726	1.20579e-39	1917	359.699	1557.3	226	123.917	102.083
Cd36_18730	orf19.812	0.0256042	0.426141	0.0600838	5.7167e-46	1371	298.382	1072.62	124	97	27
Cd36_18740	orf19.811	0.046769	0.562584	0.0831325	1.06955e-36	999	216.037	782.963	121	85.5	35.5
Cd36_18750	orf19.810	0.101273	0.604159	0.167626	3.44971e-85	3537	771.332	2765.67	582	320	262
Cd36_18760	orf19.809	0.0450756	0.499046	0.0903234	2.78768e-43	1353	286.278	1066.72	151	104.333	46.6667
Cd36_18770	orf19.808	0.0767561	0.610362	0.125755	2.56655e-54	1818	381.121	1436.88	264	159.167	104.833
Cd36_18780	orf19.807	0.0932564	0.509288	0.183111	1.94169e-35	1665	368.791	1296.21	250	136.333	113.667
Cd36_18790	orf19.806	NA	0.362559	0	NA	354	80.0019	273.998	23	23	NA
Cd36_18800	orf19.805	0.0258246	0.668683	0.03862	5.07757e-45	855	185.313	669.687	99	82	17
Cd36_18810	orf19.804	0.0107177	0.521325	0.0205586	1.23346e-50	978	226.225	751.775	93	85	8
Cd36_18820	orf19.802	0.00909418	0.366915	0.0247855	2.71472e-52	1413	306.715	1106.28	99	89	10
Cd36_18830	orf19.801	0.097128	0.577552	0.168172	1.94357e-58	2442	537.535	1904.46	390	216.5	173.5
Cd36_18840	orf19.799	0.0267489	0.504037	0.0530693	1.13736e-55	1368	302.449	1065.55	139	111	28
Cd36_18850	orf19.798	0.0274594	0.27577	0.0995735	1.73861e-14	708	151.677	556.323	50	35	15
Cd36_18880	orf19.797	0.0138688	0.501511	0.027654	1.1584e-56	1179	269.338	909.662	111	98.5	12.5
Cd36_18890	orf19.796	0.00504526	0.433892	0.0116279	3.66914e-47	1011	215.507	795.493	75	71	4
Cd36_18900	orf19.795	0.0522036	0.612041	0.0852941	7.81354e-72	1983	413.111	1569.89	252	172.833	79.1667
Cd36_18910	orf19.794	0.062851	0.415607	0.151227	1.34762e-37	1818	376.346	1441.65	207	120.083	86.9167
Cd36_18920	orf19.793	0.0981327	0.373879	0.262472	3.05393e-12	1017	199.827	817.173	134	58.8333	75.1667
Cd36_18930	orf19.792	0.0448989	0.536406	0.0837032	2.06155e-29	852	167.457	684.543	94	64.1667	29.8333
Cd36_18940	orf19.791	0.00206103	0.341323	0.00603836	7.2309e-49	1227	255.278	971.722	72	70	2
Cd36_18950	orf19.1592	0.0701913	0.418975	0.167531	1.1306e-15	735	160.432	574.568	90	51.5	38.5
Cd36_18960	orf19.1591	0.0154008	0.27395	0.0562176	1.14322e-30	1206	287.593	918.407	80	66	14
Cd36_18970	orf19.1590	0.126918	0.355803	0.35671	8.78294e-13	1665	321.794	1343.21	248	91.1667	156.833
Cd36_18980	orf19.4521	0.0360199	0.360414	0.0999403	1.60347e-25	1008	221.315	786.685	91	63.3333	27.6667
Cd36_18990	orf19.4520	0.0636228	0.372549	0.170777	6.10906e-11	564	118.637	445.363	62	34.8333	27.1667
Cd36_19000	orf19.4519	0.04705	0.383973	0.122535	2.18553e-48	2145	467.535	1677.46	217	140.5	76.5
Cd36_19010	orf19.4518	0.0343852	0.501171	0.0686098	4.08224e-102	2868	631.489	2236.51	306	230.833	75.1667
Cd36_19020	orf19.4517	0.0448983	0.266319	0.168589	4.64456e-17	1218	254.274	963.726	99	57	42
Cd36_19030	orf19.4516	0.0278945	0.357835	0.0779536	6.6927e-41	1539	333.836	1205.16	128	95	33
Cd36_19040	orf19.4515	0.060743	0.341985	0.177619	2.75251e-12	732	149.292	582.708	75	41	34
Cd36_19050	orf19.4513	0.0474179	0.210325	0.225451	1.64723e-11	1173	248.082	924.918	88	45.5	42.5
Cd36_19060	orf19.4507	0.161988	0.666549	0.243024	1.04275e-05	258	52.0813	205.919	53	23	30
Cd36_19070	orf19.4506	0.00411242	0.246932	0.0166541	1.20251e-35	1251	275.667	975.333	62	58	4
Cd36_19080	orf19.4504	0.045934	0.39202	0.117173	1.01471e-25	1047	235.281	811.719	108	71.8333	36.1667
Cd36_19090	orf19.4503	0.0163845	0.245207	0.0668191	2.61091e-15	675	140.246	534.754	38	29.3333	8.66667
Cd36_19100	orf19.4502	0.0248123	0.481427	0.0515391	1.6197e-217	5739	1266.13	4472.87	559	449.833	109.167
Cd36_19110	orf19.4499	0.0388632	0.258453	0.150369	2.07556e-18	1194	269.87	924.13	94	59	35
Cd36_19120	orf19.4498	0.0864602	0.374421	0.230917	1.32532e-10	699	135.708	563.292	86	40	46
Cd36_19130	orf19.4497	0.0460902	0.300027	0.15362	2.07539e-12	714	143.563	570.437	61	35.5	25.5
Cd36_19140	orf19.4496	0.0532628	0.332365	0.160254	1.36522e-19	1050	239.609	810.391	106	64.3333	41.6667
Cd36_19150	orf19.4495	0.00645816	0.164436	0.0392746	4.09264e-26	1470	329.59	1140.41	56	48.6667	7.33333
Cd36_19160	orf19.4494	0.043516	0.292165	0.148943	4.23536e-20	1230	250.365	979.635	102	60.5833	41.4167
Cd36_19170	orf19.4492	0.0666654	0.220883	0.301813	9.46495e-09	1242	241.296	1000.7	110	46.1667	63.8333
Cd36_19180	orf19.4491	0.032708	0.214112	0.152761	3.77411e-13	1053	209.383	843.617	66	39	27
Cd36_19190	orf19.4490.2	0.00903892	0.140601	0.0642878	0.000111862	285	62.3985	222.601	10	8	2
Cd36_19200	orf19.4490	0.0141982	0.174599	0.0813186	3.6265e-09	555	128.398	426.602	26	20	6
Cd36_19210	orf19.4488	0.160426	0.354684	0.452308	1.95841e-13	2784	549.341	2234.66	478	155.25	322.75
Cd36_19220	orf19.144	0.137373	0.354716	0.387277	1.13129e-18	2883	592.645	2290.35	455	167.5	287.5
Cd36_19230	orf19.145	0.115664	0.27708	0.417438	0.000129515	777	150.365	626.635	102	34.8333	67.1667
Cd36_19240	orf19.147	0.0524266	0.28834	0.181822	5.20275e-33	2379	506.163	1872.84	216	121.167	94.8333
Cd36_19250	orf19.150	0.0028467	0.184507	0.0154287	2.96556e-11	462	110.049	351.951	19	18	1
Cd36_19260	orf19.151	0.0709766	0.366658	0.193577	5.31332e-31	1935	422.681	1512.32	225	122.583	102.417
Cd36_19270	orf19.154	0.0888135	0.388856	0.228397	1.81917e-14	1002	196.092	805.908	127	59.5	67.5
Cd36_19280	orf19.155	0.0260122	0.23519	0.110601	1.46138e-17	1023	214.644	808.356	64	43.3333	20.6667
Cd36_19300	orf19.194	0.0977229	0.301719	0.323887	1.11693e-12	1545	315.338	1229.66	191	78.3333	112.667
Cd36_19310	orf19.193	0.0394612	0.323433	0.122007	8.2516e-16	810	150.982	659.018	65	39.6667	25.3333
Cd36_19320	orf19.192	0.0583796	0.28889	0.202083	2.06584e-21	1641	353.135	1287.86	157	84.6667	72.3333
Cd36_19330	orf19.191	0.0398542	0.38676	0.103046	2.58677e-65	2607	580.23	2026.77	254	175.333	78.6667
Cd36_19340	orf19.190	0.045818	0.369443	0.124019	2.07028e-21	954	196.536	757.464	91	57.3333	33.6667
Cd36_19350	orf19.185	0.0312652	0.306882	0.10188	2.14969e-23	1065	232.279	832.721	84	58.5	25.5
Cd36_19360	orf19.184	0.0241336	0.414804	0.0581807	1.84645e-47	1386	312.289	1073.71	125	99.5	25.5
Cd36_19370	orf19.183	0.00389872	0.433967	0.00898391	1.95089e-34	660	145.676	514.324	50	48	2
Cd36_19380	orf19.182	0.0778523	0.423465	0.183846	7.74316e-25	1320	289.996	1030	170	93.8333	76.1667
Cd36_19390	orf19.4128	0.0289545	0.378428	0.0765127	7.62623e-36	1269	271.444	997.556	109	80.6667	28.3333
Cd36_19410	orf19.4127	0.0148276	0.314335	0.0471714	7.53618e-40	1305	317.395	987.605	96	81.5	14.5
Cd36_19420	orf19.4125	0.0465193	0.50164	0.0927343	1.03274e-37	1227	251.518	975.482	136	92	44
Cd36_19430	orf19.4123	0.050679	0.439814	0.115228	1.19464e-119	4797	1025.25	3771.75	526	341.167	184.833
Cd36_19440	orf19.3521	0.0264812	0.421726	0.0627925	1.02675e-25	747	170.502	576.498	70	55	15
Cd36_19450	orf19.3523	0.0672773	0.45199	0.148847	7.72299e-51	2235	502.236	1732.76	282	170.5	111.5
Cd36_19460	orf19.3526	0.0200709	0.311954	0.0643392	1.30034e-44	1662	399.672	1262.33	127	102	25
Cd36_19470	orf19.3527	0.00373431	0.102635	0.0363844	2.80409e-11	864	192.865	671.135	21	18.5	2.5
Cd36_19480	orf19.3528	0.0240377	0.477033	0.0503901	7.33514e-17	426	87.8279	338.172	39	31	8
Cd36_19490	orf19.3529	0.0536695	0.568307	0.0944375	5.58307e-60	1827	378.961	1448.04	226	151	75
Cd36_19500	orf19.3530	0.00127248	0.390307	0.0032602	7.54959e-45	987	200.465	786.535	62	61	1
Cd36_19510	orf19.3531	0.050109	0.349494	0.143376	6.20203e-17	810	180.767	629.233	81	50.5	30.5
Cd36_19520	orf19.3532	0.0184123	0.226548	0.0812732	3.12572e-16	849	189.228	659.772	49	37	12
Cd36_19530	orf19.3533	0.0196193	0.333062	0.0589057	1.43916e-12	447	85.5207	361.479	30	23	7
Cd36_19540	orf19.3534	NA	0.317504	0	NA	630	139.073	490.927	36	36	NA
Cd36_19550	orf19.3535	0.0340752	0.310498	0.109744	6.86525e-19	861	200.591	660.409	73	51	22
Cd36_19560	orf19.3536	0.032245	0.492239	0.0655069	9.01657e-48	1386	277.061	1108.94	135	100	35
Cd36_19570	orf19.3537	0.00990063	0.539475	0.0183524	5.51497e-22	396	90.9847	305.015	38	35	3
Cd36_19580	orf19.3538	0.0603619	0.44835	0.134631	8.54134e-54	2247	499.776	1747.22	270	168.667	101.333
Cd36_19590	orf19.3539	0.0367075	0.469526	0.0781799	2.9797e-33	984	216.352	767.648	103	75.5	27.5
Cd36_19600	orf19.3540	0.0297306	0.414298	0.0717614	1.03699e-68	2274	490.067	1783.93	208	156	52
Cd36_19610	orf19.3541	0.000968144	0.243196	0.00398091	6.96904e-40	1308	274.429	1033.57	58	57	1
Cd36_19620	orf19.3542	0.0185803	0.501383	0.0370581	1.20293e-56	1317	281.693	1035.31	122	103	19
Cd36_19630	orf19.3544	0.0271986	0.317542	0.0856536	4.12461e-27	1116	254.942	861.058	89	66	23
Cd36_19640	orf19.3545	0.0242425	0.586834	0.0413107	7.69368e-157	3378	737.037	2640.96	363	300	63
Cd36_19650	orf19.3546	0.0242906	0.626034	0.0388007	4.7919e-64	1260	276.796	983.204	141	117.5	23.5
Cd36_19660	orf19.3547	0.0225385	0.434292	0.0518972	1.06501e-69	2001	424.655	1576.35	175	140	35
Cd36_19670	orf19.3548	0.00771961	0.473246	0.016312	4.7889e-33	669	148.168	520.832	56	52	4
Cd36_19680	orf19.3548.1	NA	0.18562	0	NA	195	42.5704	152.43	7	7	NA
Cd36_19690	orf19.3549	0.0114661	0.392436	0.0292176	1.99659e-36	945	198	747	69	60.5	8.5
Cd36_19700	orf19.3550	1.76553	1.45436	1.21396	0.21296	1341	306.272	1034.73	899	196.667	702.333
Cd36_19710	orf19.3551	0.0398789	0.210837	0.189146	2.29829e-05	375	78.8925	296.108	26	14.5	11.5
Cd36_19720	orf19.3552	0.0410269	0.40083	0.102355	4.14494e-77	3093	663.442	2429.56	303	206	97
Cd36_19730	orf19.3553	0.0272597	0.258668	0.105385	1.71238e-17	981	196.547	784.453	64	43	21
Cd36_19740	orf19.3554	0.0429281	0.388395	0.110527	1.51362e-31	1311	280.385	1030.61	128	85	43
Cd36_19750	orf19.3555	0.0797456	0.415299	0.192019	4.95785e-39	2370	479.775	1890.23	296	153	143
Cd36_19760	orf19.3556	0.0893223	0.38461	0.232241	3.9055e-37	2841	575.785	2265.21	364	173.25	190.75
Cd36_19770	orf19.3557	0.142962	0.434903	0.328722	3.8502e-07	597	131.557	465.443	104	43.4167	60.5833
Cd36_19780	orf19.3558	0.0333161	0.253119	0.131622	3.92593e-11	639	132.662	506.338	45	28.5	16.5
Cd36_19790	orf19.3559	0.0246869	0.224776	0.109829	2.67755e-15	942	200.803	741.197	57	39	18
Cd36_19800	orf19.3561	0.0451296	0.45773	0.0985942	2.76869e-53	1869	402.058	1466.94	202	137.75	64.25
Cd36_19810	orf19.3563	0.0951007	0.37777	0.251742	2.93927e-20	1476	352.676	1123.32	205	104.667	100.333
Cd36_19820	orf19.3564	0.00508438	0.272841	0.0186349	7.51296e-31	1008	218.607	789.393	54	50	4
Cd36_19830	orf19.3565	0.0922709	0.26005	0.35482	3.19337e-06	846	184.676	661.324	98	40.5833	57.4167
Cd36_19840	orf19.3567	0.0512955	0.301559	0.170101	2.39521e-22	1410	307.419	1102.58	131	76.3333	54.6667
Cd36_19850	orf19.3568	0.105145	0.39087	0.269003	6.51018e-19	1527	330.186	1196.81	218	100.583	117.417
Cd36_19860	orf19.3569	0.0568502	0.461947	0.123066	8.72327e-29	1101	233.404	867.596	128	80.5	47.5
Cd36_19870	orf19.3571	0.064942	0.215722	0.301045	0.000441707	414	81.7907	332.209	36	15.3333	20.6667
Cd36_19880	orf19.3572	0.094935	0.39657	0.23939	8.25834e-18	1275	257.306	1017.69	170	79.25	90.75
Cd36_19890	orf19.3572.3	0.00380536	0.119277	0.0319036	2.51372e-05	336	72.5455	263.455	9	8	1
Cd36_19900	orf19.3573	0.0337284	0.444644	0.0758548	1.11951e-105	3438	729.387	2708.61	334	244.667	89.3333
Cd36_19910	orf19.3574	0.015084	0.295472	0.0510507	2.71574e-12	429	94.1792	334.821	28	23	5
Cd36_19920	orf19.3575	0.00776079	0.208353	0.0372482	5.30098e-33	1512	346.313	1165.69	72	63	9
Cd36_19930	orf19.3577	0.0205046	0.392802	0.0522008	1.6823e-31	918	201.13	716.87	76	61.5	14.5
Cd36_19940	orf19.3577.1	0.0408077	0.410877	0.0993185	1.74111e-07	252	50.5768	201.423	24	16	8
Cd36_19950	orf19.3578	0.111733	0.363067	0.307748	1.35735e-05	441	99.0249	341.975	64	28.5	35.5
Cd36_19960	orf19.3579	0.0111087	0.19841	0.0559887	1.04271e-13	699	154.874	544.126	33	27	6
Cd36_19970	orf19.3581	0.0450103	0.601425	0.0748395	2.11121e-50	1296	265.93	1030.07	155	110	45
Cd36_19980	orf19.3582	0.0347163	0.447064	0.077654	5.35013e-23	738	148.466	589.534	70	50	20
Cd36_19990	orf19.3583	0.0646905	0.445266	0.145285	1.49449e-26	1128	248.671	879.329	138	83.5	54.5
Cd36_20010	orf19.6867	0.0163003	0.473432	0.0344301	1.5421e-16	387	76.9117	310.088	32	27	5
Cd36_20020	orf19.6868	0.0313121	0.52177	0.0600113	6.22949e-42	1014	231.412	782.588	111	87	24
Cd36_20030	orf19.6869	0.0197395	0.496756	0.0397368	1.98469e-44	1047	225.729	821.271	98	82	16
Cd36_20040	orf19.6871	0.0451274	0.52613	0.0857724	3.78056e-132	3978	872.735	3105.26	466	330	136
Cd36_20050	orf19.6872	0.0294498	0.470962	0.0625311	1.20346e-32	900	190.143	709.857	87	66.5	20.5
Cd36_20060	orf19.6873	NA	0.0412827	0	NA	618	149.376	468.624	6	6	NA
Cd36_20070	orf19.6873.1	0.00594007	0.259827	0.0228616	1.60628e-06	210	40.9842	169.016	10	9	1
Cd36_20080	orf19.6874	0.0574285	0.516996	0.111081	2.0824e-53	1797	404.213	1392.79	228	151	77
Cd36_20090	orf19.6875	0.0368339	0.528954	0.0696352	1.00131e-99	2808	582.315	2225.68	301	221	80
Cd36_20100	orf19.6877	0.0615798	0.509441	0.120877	1.88754e-77	2868	609.865	2258.13	359	225.5	133.5
Cd36_20110	orf19.6879	0.0706648	0.480147	0.147173	1.29136e-19	798	167.791	630.209	102	59.5	42.5
Cd36_20120	orf19.6880	0.0309035	0.52418	0.0589559	1.03518e-100	2643	562.105	2080.89	275	212	63
Cd36_20130	orf19.6881	0.013651	0.641763	0.021271	4.21402e-36	645	127.534	517.466	62	55	7
Cd36_20140	orf19.6882	0.0279623	0.557661	0.0501421	3.57049e-66	1509	343.134	1165.87	167	135	32
Cd36_20150	orf19.6882.1	0.00405818	0.132862	0.0305444	9.81805e-06	321	73.9168	247.083	10	9	1
Cd36_20160	orf19.6883	0.0160225	0.418313	0.0383026	1.42628e-48	1290	280.698	1009.3	106	90	16
Cd36_20170	orf19.6884	0.035721	0.498478	0.0716601	3.21367e-52	1455	322.665	1132.34	157	117.5	39.5
Cd36_20180	orf19.6885	0.0365693	0.432686	0.0845168	3.99583e-47	1539	348.258	1190.74	157	114.5	42.5
Cd36_20190	orf19.6886	0.03475	0.551433	0.0630177	2.96641e-46	1242	240.742	1001.26	128	94	34
Cd36_20210	orf19.6888	0.0762249	0.538987	0.141422	4.63873e-25	936	202.458	733.542	131	77.8333	53.1667
Cd36_20220	orf19.6889	0.0366492	0.501007	0.073151	3.63581e-47	1335	288.91	1046.09	143	105.583	37.4167
Cd36_20230	orf19.6891	0.0500906	0.50847	0.0985123	1.41827e-81	2655	580.889	2074.11	315	214.5	100.5
Cd36_20240	orf19.6893	0.0550599	0.66294	0.0830542	1.00844e-51	1350	274.73	1075.27	178	120.917	57.0833
Cd36_20250	orf19.5204	0.0493096	0.547228	0.090108	1.1828e-57	1626	382.73	1243.27	208	148.667	59.3333
Cd36_20260	orf19.5205	0.0316599	0.496341	0.0637866	8.42444e-53	1443	314.003	1129	149	114	35
Cd36_20270	orf19.5206	0.0408405	0.603282	0.0676973	5.35125e-60	1524	308.02	1215.98	176	127.667	48.3333
Cd36_20280	orf19.5207	0.0247813	0.558595	0.0443637	2.76946e-57	1278	272.929	1005.07	132	107.5	24.5
Cd36_20290	orf19.5209	0.0398102	0.506474	0.0786028	3.89254e-76	2313	477.488	1835.51	247	175.833	71.1667
Cd36_20300	orf19.5210	0.0985536	0.523697	0.188188	1.8461e-36	1722	382.935	1339.07	268	144.333	123.667
Cd36_20310	orf19.5211	0.00844175	0.466577	0.0180929	2.72769e-62	1299	286.422	1012.58	108	99.5	8.5
Cd36_20320	orf19.5212	0.0494344	0.570932	0.0865854	1.85126e-39	1083	236.436	846.564	135	94.5	40.5
Cd36_20330	orf19.5213	0.156565	0.516376	0.3032	1.01611e-29	2400	534.043	1865.96	463	199.333	263.667
Cd36_20340	orf19.5213.1	0.0186367	0.203601	0.0915353	1.86059e-05	279	61.6919	217.308	15	11	4
Cd36_20350	orf19.5213.2	0.00708211	0.193025	0.0366902	0.000123684	183	41.1314	141.869	8	7	1
Cd36_20360	orf19.5214	0.040641	0.550504	0.073825	3.46986e-74	2094	425.627	1668.37	232	166	66
Cd36_20370	orf19.5215	0.0295248	0.554737	0.053223	1.81078e-44	1056	227.018	828.982	113	89	24
Cd36_20380	orf19.5216	0.0376212	0.424296	0.0886674	4.53397e-27	894	199.049	694.951	90	64.5	25.5
Cd36_20390	orf19.5217	0.0581696	0.490484	0.118596	3.00087e-25	894	197.211	696.789	110	71	39
Cd36_20400	orf19.4122	0.0265121	0.366928	0.0722541	1.08355e-27	978	210.215	767.785	81	61	20
Cd36_20410	orf19.4121	0.0382132	0.623527	0.0612856	1.92956e-51	1152	261.763	890.237	144	110.833	33.1667
Cd36_20420	orf19.4120	0.0991332	0.526936	0.188131	3.86824e-30	1464	311.739	1152.26	225	118	107
Cd36_20430	orf19.4119	0.0495242	0.480285	0.103114	2.9012e-157	5523	1207.19	4315.81	635	428.167	206.833
Cd36_20440	orf19.4118	0.0167726	0.401117	0.0418148	5.28234e-66	1824	407.184	1416.82	150	126.5	23.5
Cd36_20450	orf19.4117	0.0735863	0.427714	0.172046	2.67324e-28	1428	304.47	1123.53	178	99.25	78.75
Cd36_20460	orf19.4116	0.0599331	0.422366	0.141899	4.19792e-28	1263	264.753	998.247	143	85.5	57.5
Cd36_20470	orf19.4114	0.0400581	0.480905	0.0832975	2.25465e-69	2151	471.821	1679.18	233	167.5	65.5
Cd36_20480	orf19.4112	0.0349983	0.462287	0.0757068	6.39772e-31	915	198.505	716.495	93	68.5	24.5
Cd36_20490	orf19.4110	0.0568695	0.495936	0.114671	2.71384e-84	3108	658.224	2449.78	373	238.833	134.167
Cd36_20500	orf19.4109	0.0119593	0.355023	0.0336861	2.22255e-76	2265	495.01	1769.99	161	140	21
Cd36_20510	orf19.4107	0.0619071	0.543556	0.113893	5.06448e-36	1203	252.158	950.842	154	97.5	56.5
Cd36_20520	orf19.4106	0.0688462	0.545257	0.126264	1.6116e-29	1044	215.492	828.508	138	83.5	54.5
Cd36_20530	orf19.4105	0.0899682	0.447358	0.20111	1.05782e-16	936	192.913	743.087	128	65	63
Cd36_20540	orf19.4104	0.0246924	0.535125	0.0461431	7.56073e-69	1602	346.355	1255.64	163	132.5	30.5
Cd36_20550	orf19.4102	0.0107268	0.402609	0.0266432	2.85756e-33	837	179.75	657.25	63	56	7
Cd36_20560	orf19.4099	0.0181047	0.433482	0.0417658	3.38581e-161	4311	956.791	3354.21	375	315	60
Cd36_20570	orf19.5479	0.0415924	0.403755	0.103014	2.72915e-30	1146	256.236	889.764	116	80	36
Cd36_20580	orf19.5480	0.0172378	0.398355	0.0432723	1.8641e-61	1707	386.669	1320.33	142	119.5	22.5
Cd36_20590	orf19.5483	0.0138774	0.462251	0.0300214	5.14857e-84	1962	434.707	1527.29	171	150	21
Cd36_20600	orf19.5484	0.0211427	0.51061	0.0414067	3.10524e-51	1176	264.617	911.383	117	98	19
Cd36_20610	orf19.5485	0.0393023	0.471985	0.0832702	7.56809e-32	957	212.686	744.314	103	74.5	28.5
Cd36_20620	orf19.5486	0.0164983	0.498768	0.0330782	5.36762e-103	2349	510.562	1838.44	216	186	30
Cd36_20640	orf19.5487	0.00324878	0.40141	0.00809341	2.09425e-100	2184	487.386	1696.61	157	151.5	5.5
Cd36_20650	orf19.5488	0.0199863	0.592916	0.0337084	6.84289e-26	513	107.368	405.632	52	44	8
Cd36_20660	orf19.5489	0.0781296	0.530281	0.147336	9.98155e-12	429	92.063	336.937	60	35	25
Cd36_20670	orf19.5491	0.0349495	0.37265	0.0937862	2.56432e-29	1185	233.251	951.749	101	68.5	32.5
Cd36_20680	orf19.5491.1	0.00401242	0.13249	0.0302848	9.25825e-06	324	74.1064	249.894	10	9	1
Cd36_20690	orf19.5492	0.0573922	0.591169	0.0970825	1.62432e-15	450	88.017	361.983	56	36	20
Cd36_20700	orf19.5493	NA	0.109684	0	NA	642	137.2	504.8	14	14	NA
Cd36_20710	orf19.5495	0.0704001	0.476979	0.147596	1.57503e-73	3255	690.402	2564.6	416	243.667	172.333
Cd36_20720	orf19.5496	0.0235127	0.469824	0.0500457	1.07222e-63	1605	373.788	1231.21	159	130.5	28.5
Cd36_20730	orf19.5498	0.061583	0.544155	0.113172	9.43089e-62	2076	452.252	1623.75	271	175	96
Cd36_20740	orf19.5499	0.0203018	0.511954	0.0396556	3.05075e-59	1434	285.695	1148.31	129	106	23
Cd36_20750	orf19.5500	0.011409	0.224272	0.0508711	3.6128e-20	939	188.293	750.707	45	36.5	8.5
Cd36_20760	orf19.17	0.0238243	0.320045	0.0744403	7.34098e-15	561	113.236	447.764	40	29.5	10.5
Cd36_20770	orf19.18	0.0159256	0.212102	0.0750848	2.38736e-28	1563	357.242	1205.76	85	66	19
Cd36_20780	orf19.20	0.0131937	0.352973	0.0373789	1.95981e-82	2535	546.984	1988.02	180	154	26
Cd36_20790	orf19.21	0.0471695	0.400141	0.117882	1.16444e-14	585	122.004	462.996	59	37.8333	21.1667
Cd36_20800	orf19.22	0.0174708	0.362933	0.0481378	2.04065e-23	732	152.924	579.076	54	44	10
Cd36_20820	orf19.23	0.0482796	0.472547	0.102169	7.67602e-42	1380	314.24	1065.76	160	110.167	49.8333
Cd36_20830	orf19.24	0.0625182	0.444188	0.140747	5.64683e-33	1356	311.267	1044.73	167	104.333	62.6667
Cd36_20840	orf19.25	0.0548769	0.342922	0.160027	2.8375e-18	963	207.104	755.896	97	57	40
Cd36_20850	orf19.26	0.0985609	0.463583	0.212607	1.18961e-20	1173	247.268	925.732	171	85.5	85.5
Cd36_20860	orf19.27	0.0499763	0.504454	0.0990701	4.83029e-38	1239	266.872	972.128	145	98	47
Cd36_20870	orf19.28	0.0133398	0.370536	0.0360013	1.48685e-33	903	222.309	680.691	74	65	9
Cd36_20880	orf19.29	0.0453406	0.336711	0.134657	1.65865e-19	966	204.589	761.411	89	55.5	33.5
Cd36_20890	orf19.30	0.00950014	0.275835	0.0344414	2.56799e-99	3666	805.9	2860.1	213	186	27
Cd36_20900	orf19.31	0.0479861	0.315766	0.151967	2.24938e-13	741	149.388	591.612	66	38.5	27.5
Cd36_20910	orf19.34	0.0180706	0.311892	0.0579387	2.26325e-42	1551	346.83	1204.17	110	88.5	21.5
Cd36_20920	orf19.35	0.0855826	0.270151	0.316795	9.47717e-20	2754	563.519	2190.48	305	127.833	177.167
Cd36_20930	orf19.36	0.0391755	0.291285	0.134492	3.74418e-21	1251	242.352	1008.65	97	58.5	38.5
Cd36_20940	orf19.1295	0.0181665	0.199439	0.0910878	2.283e-49	3321	702.359	2618.64	170	123	47
Cd36_20960	orf19.81	0.114357	0.171684	0.666091	0.0936928	798	155.315	642.685	92	23.8333	68.1667
Cd36_20970	orf19.1223	0.0389479	0.234005	0.16644	9.45531e-26	2076	418.288	1657.71	147	84.0833	62.9167
Cd36_20980	orf19.1224	0.0248771	0.367099	0.0677668	5.13391e-26	834	190.331	643.669	71	55.25	15.75
Cd36_20990	orf19.1225	0.164424	0.259384	0.633902	0.0444171	621	129.969	491.031	101	28.5	72.5
Cd36_21000	orf19.3152	0.0251205	0.231828	0.108358	5.9979e-33	2004	432.083	1571.92	125	86.1667	38.8333
Cd36_21010	orf19.3151	0.153864	0.278336	0.552798	0.000537088	1143	246.208	896.792	182	57.25	124.75
Cd36_21020	orf19.3150	0.0957323	0.247022	0.387545	2.23181e-06	1035	232.027	802.973	121	48.8333	72.1667
Cd36_21030	orf19.3149	0.00136361	0.10291	0.0132505	6.06915e-13	942	207.983	734.017	21	20	1
Cd36_21040	orf19.3148	0.109321	0.429942	0.254269	8.67941e-32	2454	502.697	1951.3	363	164.5	198.5
Cd36_21050	orf19.3147	0.0778856	0.383243	0.203228	1.86527e-11	684	143.298	540.702	83	43	40
Cd36_21060	orf19.2227	0.132801	0.422518	0.314308	2.67309e-13	1203	251.267	951.733	197	81.1667	115.833
Cd36_21070	orf19.2228	0.0904865	0.366449	0.246928	9.57439e-16	1200	252.686	947.314	154	73.25	80.75
Cd36_21080	orf19.2229	0.105204	0.471114	0.22331	1.7099e-26	1590	345.419	1244.58	243	120.833	122.167
Cd36_21090	orf19.2230	0.00885635	0.142831	0.062006	3.52416e-06	357	73.0466	283.953	12	9.5	2.5
Cd36_21100	orf19.2231	0.040371	0.353885	0.11408	2.54778e-17	774	150.649	623.351	67	42.5	24.5
Cd36_21110	orf19.2232	0.00521267	0.0646648	0.0806106	0.000632036	498	112.984	385.016	9	7	2
Cd36_21120	orf19.2233	0.00910655	0.175083	0.0520129	2.96942e-15	855	192.125	662.875	36	30	6
Cd36_21130	orf19.2236	0.0543456	0.397337	0.136775	1.00105e-73	3342	784.298	2557.7	376	241.917	134.083
Cd36_21140	orf19.2237	0.124115	0.378401	0.327999	9.34558e-14	1542	304.269	1237.73	232	90.4167	141.583
Cd36_21160	orf19.2238	0.0740577	0.432161	0.171366	1.47933e-83	4539	930.031	3608.97	560	305.5	254.5
Cd36_21170	orf19.2241	0.0675014	0.329116	0.205099	5.86695e-10	594	137.01	456.99	66	36.5	29.5
Cd36_21180	orf19.2242	0.0311004	0.354124	0.0878235	1.10844e-35	1395	311.767	1083.23	121	88	33
Cd36_21190	orf19.2244	0.0285517	0.457212	0.0624473	1.0539e-33	957	207.402	749.598	92	71	21
Cd36_21200	orf19.2245	0.00653171	0.359303	0.0181789	1.56746e-25	648	135.444	512.556	42	38.6667	3.33333
Cd36_21210	orf19.2246	0.031314	0.520867	0.060119	9.43739e-30	759	155.791	603.209	77	58.5	18.5
Cd36_21220	orf19.2247	0.028644	0.538915	0.0531512	2.16413e-63	1515	340.785	1174.22	164	131	33
Cd36_21230	orf19.2248	0.037485	0.560392	0.0668907	5.79771e-69	1827	377.475	1449.52	202	149	53
Cd36_21240	orf19.2249	0.0249425	0.406779	0.061317	1.08108e-22	714	143.324	570.676	59	45	14
Cd36_21250	orf19.2250	0.00426529	0.30078	0.0141808	3.68314e-30	891	185.647	705.353	49	46	3
Cd36_21260	orf19.2251	0.0183793	0.525229	0.0349929	5.44166e-46	1038	211.823	826.177	95	80	15
Cd36_21270	orf19.2252	0.0849007	0.511614	0.165947	8.93295e-35	1533	337.06	1195.94	221	125	96
Cd36_21280	orf19.2253	0.0270015	0.457571	0.0590105	9.06006e-56	1554	347.419	1206.58	151	119	32
Cd36_21290	orf19.2256	0.0479463	0.473578	0.101242	1.1216e-20	690	140.973	549.027	75	49.5	25.5
Cd36_21300	orf19.2257	0.0185954	0.436	0.0426499	5.32653e-41	1101	229.86	871.14	92	76	16
Cd36_21310	orf19.2258	0.0677638	0.601234	0.112708	4.75412e-39	1179	268.403	910.597	170	111	59
Cd36_21320	orf19.2259	0.0388368	0.405173	0.0958525	1.55995e-22	813	178.891	634.109	80	56	24
Cd36_21330	orf19.2260	0.0755546	0.647225	0.116736	8.76411e-35	1074	220.649	853.351	157	95.6667	61.3333
Cd36_21340	orf19.2261	0.0301414	0.431124	0.0699135	2.03362e-25	777	167.734	609.266	73	55	18
Cd36_21350	orf19.2262	0.0222542	0.555851	0.0400363	4.64734e-47	1002	226.711	775.289	106	89	17
Cd36_21360	orf19.2263	0.0280811	0.464985	0.0603915	7.25206e-21	537	119.758	417.242	53	41.5	11.5
Cd36_21370	orf19.2264	0.0287474	0.529529	0.0542886	4.85333e-63	1578	337.017	1240.98	163	128	35
Cd36_21380	orf19.2265	0.024352	0.497693	0.0489297	1.77184e-56	1407	301.03	1105.97	136	109.5	26.5
Cd36_21390	orf19.2266	0.0751793	0.583571	0.128826	1.31859e-71	2490	544.541	1945.46	360	220.833	139.167
Cd36_21400	orf19.2267	0.127856	0.420171	0.304295	7.21813e-10	804	178.743	625.257	131	57.5	73.5
Cd36_21410	orf19.2268	0.0257647	0.489159	0.0526713	5.27916e-65	1707	364.566	1342.43	165	131	34
Cd36_21420	orf19.2269	0.0172251	0.368289	0.0467706	1.66675e-23	735	147.76	587.24	53	43	10
Cd36_21430	orf19.2270	0.0421782	0.353158	0.119432	3.77947e-38	1716	397.348	1318.65	166	111.917	54.0833
Cd36_21440	orf19.2272	0.0867251	0.467588	0.185473	3.48508e-45	2346	514.469	1831.53	329	179	150
Cd36_21450	orf19.2274	0.0380123	0.450225	0.0844295	1.49351e-23	732	165.429	566.571	77	56	21
Cd36_21460	orf19.2275	0.0243314	0.271307	0.0896822	1.66298e-12	522	125.19	396.81	38	28.5	9.5
Cd36_21470	orf19.2276	0.00374852	0.199313	0.0188072	2.47014e-08	336	68.5607	267.439	13	12	1
Cd36_21480	orf19.2277	0.0154353	0.438865	0.0351709	1.25055e-52	1299	284.437	1014.56	110	94.5	15.5
Cd36_21490	orf19.2278	0.0981336	0.468028	0.209675	1.90105e-14	792	172.331	619.669	117	60	57
Cd36_21500	orf19.2280	0.0729968	0.552348	0.132157	2.92568e-74	2712	598.623	2113.38	381	234	147
Cd36_21510	orf19.2281	0.0212682	0.540942	0.039317	3.01637e-70	1500	355.48	1144.52	161	137	24
Cd36_21520	orf19.2282	0.0269333	0.518308	0.0519639	4.43264e-41	990	215.112	774.888	101	80.5	20.5
Cd36_21530	orf19.2283	0.00595451	0.39587	0.0150416	1.03023e-19	438	100.785	337.215	33	31	2
Cd36_21540	orf19.2284	0.0283047	0.353815	0.0799987	8.32252e-24	879	194.988	684.012	74	55	19
Cd36_21550	orf19.2285	0.0746153	0.461099	0.16182	3.17169e-36	1692	361.459	1330.54	219	124.5	94.5
Cd36_21560	orf19.2286	0.0168895	0.5047	0.0334644	1.65247e-43	954	205.53	748.47	88	75.5	12.5
Cd36_21570	orf19.2287	0.00351182	0.324198	0.0108323	1.11794e-14	369	83.5799	285.42	23	22	1
Cd36_21580	orf19.2288	0.00235438	0.433086	0.00543628	6.91513e-82	1644	367.778	1276.22	124	121	3
Cd36_21590	orf19.2289	0.002048	0.384728	0.00532323	4.72553e-57	1257	279.103	977.897	86	84	2
Cd36_21600	orf19.2290	0.0147079	0.541606	0.027156	0	7437	1623.82	5813.18	711	626.333	84.6667
Cd36_21610	orf19.1902	0.0394991	0.433898	0.0910333	1.99898e-47	1686	347.54	1338.46	166	114.5	51.5
Cd36_21620	orf19.1901	0.0133804	0.433739	0.0308491	2.98643e-107	2631	595.076	2035.92	223	196	27
Cd36_21630	orf19.1900	0.132035	0.543663	0.242862	7.55706e-24	1437	301.256	1135.74	254	116.5	137.5
Cd36_21640	orf19.1897	0.0499372	0.503317	0.0992162	1.74402e-31	1029	211.381	817.619	117	77.5	39.5
Cd36_21650	orf19.1896	0.00268515	0.243775	0.0110149	1.17061e-57	1944	451.657	1492.34	98	94	4
Cd36_21660	orf19.1893	0.0777367	0.525147	0.148028	1.14429e-54	2208	487.023	1720.98	311	183.917	127.083
Cd36_21670	orf19.1891	0.00829475	0.436276	0.0190126	6.02563e-57	1257	287.191	969.809	103	95	8
Cd36_21680	orf19.1890	0.0339114	0.584089	0.0580586	9.67381e-62	1464	317.908	1146.09	167	129	38
Cd36_21690	orf19.1889	0.0262685	0.496755	0.0528803	1.37653e-29	720	158.286	561.714	72	57.5	14.5
Cd36_21700	orf19.1888	0.0479898	0.599619	0.0800337	4.84428e-38	990	215.584	774.416	125	89	36
Cd36_21710	orf19.1887	0.0744033	0.676284	0.110018	8.2588e-58	1701	356.266	1344.73	254	158.75	95.25
Cd36_21720	orf19.1886	0.0189967	0.500766	0.0379354	8.31992e-50	1113	260.039	852.961	111	95	16
Cd36_21730	orf19.1885	0.0370759	0.606366	0.0611445	4.23098e-47	1080	236.863	843.137	129	98.5	30.5
Cd36_21740	orf19.1883	0.0313828	0.462355	0.0678759	3.41152e-117	3507	757.715	2749.28	346	261.5	84.5
Cd36_21750	orf19.1881	0.0300472	0.47639	0.0630727	5.99291e-63	1806	380.01	1425.99	176	134	42
Cd36_21760	orf19.1880	0.0178511	0.559792	0.0318888	2.86634e-56	1158	250.987	907.013	115	99	16
Cd36_21770	orf19.1878	0.035527	0.72349	0.0491051	5.38608e-49	963	199.283	763.717	119	92.5	26.5
Cd36_21780	orf19.1877	0.136505	0.53755	0.253939	2.29796e-13	813	171.991	641.009	146	66	80
Cd36_21790	orf19.1876	0.0561046	0.487819	0.115011	1.05961e-37	1350	295.567	1054.43	163	106	57
Cd36_21800	orf19.1874	0.0900272	0.51168	0.175944	1.81594e-29	1335	292.766	1042.23	197	108.583	88.4167
Cd36_21820	orf19.1873	0.0118686	0.288183	0.0411842	3.63005e-10	330	75.2269	254.773	21	18	3
Cd36_21830	orf19.1872	0.0266745	0.358247	0.0744585	3.95631e-19	633	136.926	496.074	52	39	13
Cd36_21840	orf19.1871	0.0469245	0.488422	0.0960738	1.4572e-144	4908	1042.4	3865.6	550	374.167	175.833
Cd36_21850	orf19.1868	0.0291962	0.548287	0.0532499	1.19437e-47	1182	239.107	942.893	120	93	27
Cd36_21860	orf19.1867	0.0344228	0.391125	0.0880097	1.12986e-33	1197	275.61	921.39	115	84	31
Cd36_21870	orf19.1866	0.00373014	0.271473	0.0137404	3.69833e-11	339	70.2464	268.754	17	16	1
Cd36_21880	orf19.1865	0.0147304	0.477001	0.0308812	7.82834e-80	1842	402.327	1439.67	163	142	21
Cd36_21890	orf19.1864	0.0467658	0.661011	0.0707489	7.79313e-89	2154	450.115	1703.88	275	197.75	77.25
Cd36_21900	orf19.1863	0.0769791	0.520429	0.147915	6.85178e-43	1770	372.385	1397.62	242	139.75	102.25
Cd36_21910	orf19.1862	0.0177907	0.586949	0.0303104	2.9096e-19	363	78.6071	284.393	37	32	5
Cd36_21920	orf19.1861	0.0388977	0.501949	0.0774935	1.36921e-61	1869	378.481	1490.52	195	138.5	56.5
Cd36_21930	orf19.1860.1	0.035381	0.494064	0.0716121	2.19256e-48	1398	298.444	1099.56	146	108	38
Cd36_21940	orf19.2216	0.0432886	0.474729	0.0911859	3.00631e-116	3909	838.21	3070.79	424	294.833	129.167
Cd36_21950	orf19.2215	0.0570138	0.582686	0.0978465	1.82461e-49	1482	310.186	1171.81	190	125.667	64.3333
Cd36_21960	orf19.2214	0.0107411	0.341405	0.0314614	1.11385e-29	861	188.992	672.008	59	51.8333	7.16667
Cd36_21970	orf19.2213	0.156185	0.562357	0.277733	6.98864e-20	1353	291.498	1061.5	265	115.333	149.667
Cd36_21980	orf19.2212	0.0594291	0.378381	0.157062	7.14295e-08	312	75.7198	236.28	36	22.5	13.5
Cd36_21990	orf19.2211	0.029965	0.562236	0.0532962	8.38815e-36	837	173.155	663.845	88	68.5	19.5
Cd36_22010	orf19.2209	0.021338	0.437942	0.0487233	3.05797e-73	2025	432.593	1592.41	177	143.5	33.5
Cd36_22030	orf19.2204.2	0.00935136	0.522319	0.0179035	7.16891e-30	558	127.582	430.418	52	48	4
Cd36_22040	orf19.2204	0.0147926	0.492569	0.0300315	1.60256e-51	1104	250.621	853.379	103	90.5	12.5
Cd36_22050	orf19.2202	0.0415529	0.536202	0.0774949	2.67708e-26	723	154.014	568.986	82	59	23
Cd36_22060	orf19.2201	0.00741533	0.298617	0.0248322	8.16684e-11	336	64.953	271.047	18	16	2
Cd36_22070	orf19.2200	0.0181281	0.439526	0.0412447	4.61902e-50	1308	275.103	1032.9	110	91.5	18.5
Cd36_22080	orf19.2199	0.0341967	0.587849	0.0581726	4.98776e-43	1005	212.27	792.73	113	86.5	26.5
Cd36_22090	orf19.2198	0.04321	0.532414	0.0811586	1.31769e-77	2154	502.766	1651.23	261	191.667	69.3333
Cd36_22100	orf19.2197	0.0377337	0.596456	0.0632632	2.98032e-62	1500	322.47	1177.53	176	132.667	43.3333
Cd36_22110	orf19.2195	0.875666	1.40305	0.624116	0.0215796	540	118.861	421.139	293	75.4167	217.583
Cd36_22120	orf19.2194	0.0124027	0.419604	0.0295582	8.06809e-57	1404	306.503	1097.5	112	98.5	13.5
Cd36_22130	orf19.2193	0.0274408	0.531637	0.0516156	1.21701e-57	1338	305.026	1032.97	144	116.167	27.8333
Cd36_22140	orf19.2192	0.00732067	0.345458	0.0211912	1.53704e-113	3168	697.189	2470.81	211	193	18
Cd36_22150	orf19.2191	0.0430922	0.445938	0.0966327	7.83366e-30	1035	223.111	811.889	109	75	34
Cd36_22160	orf19.2190	0.0805664	0.469162	0.171724	8.15304e-45	1968	512.748	1455.25	290	178.833	111.167
Cd36_22170	orf19.2187	0.0336007	0.424703	0.0791157	1.7542e-46	1482	340.764	1141.24	148	110.5	37.5
Cd36_22180	orf19.2186	0.0204648	0.464855	0.0440242	1.1818e-41	1041	223.689	817.311	94	77.5	16.5
Cd36_22190	orf19.2185	0.0295193	0.476487	0.0619521	7.33241e-45	1218	267.953	950.047	122	94.5	27.5
Cd36_22200	orf19.2184	0.0256134	0.380914	0.0672419	3.58765e-27	876	200.887	675.113	77	60	17
Cd36_22210	orf19.2183	0.00705864	0.271714	0.0259782	1.85706e-52	1827	403.619	1423.38	102	92	10
Cd36_22220	orf19.2182	0.0298443	0.527238	0.0566049	2.88761e-253	6600	1399.19	5200.81	682	529.833	152.167
Cd36_22230	orf19.2181	1.28008	1.90681	0.671319	0.129856	516	119.635	396.365	326	82.6667	243.333
Cd36_22240	orf19.2179.2	0.00729725	0.0805184	0.0906284	0.00193813	354	78.5887	275.411	8	6	2
Cd36_22250	orf19.2179	0.0255007	0.429274	0.0594042	3.34508e-62	1809	413.023	1395.98	170	135	35
Cd36_22260	orf19.2178	0.00266968	0.323536	0.00825156	3.98474e-38	975	224.512	750.488	61	59	2
Cd36_22270	orf19.2177	0.940741	2.46148	0.382184	0.000454224	522	108.635	413.365	300	78.4167	221.583
Cd36_22280	orf19.2175	0.0387788	0.509253	0.0761484	7.03824e-40	1101	254.289	846.711	126	94	32
Cd36_22290	orf19.2174	0.0488929	0.643303	0.0760029	1.73159e-61	1533	328.773	1204.23	199	142	57
Cd36_22300	orf19.2173	0.0205275	0.491748	0.041744	4.51993e-38	906	189.92	716.08	83	68.5	14.5
Cd36_22310	orf19.2172	0.0184412	0.23332	0.0790382	8.94709e-19	978	209.459	768.541	56	42	14
Cd36_22320	orf19.2170	0.0281525	0.243518	0.115607	7.74133e-46	2781	627.594	2153.41	190	130.5	59.5
Cd36_22330	orf19.2169	0.0639746	0.573042	0.11164	2.0683e-22	690	146.421	543.579	92	58.6667	33.3333
Cd36_22340	orf19.2168.3	0.0151744	0.178548	0.0849877	1.17535e-08	519	119.583	399.417	25	19	6
Cd36_22350	orf19.2168	0.116831	0.335178	0.348565	1.85226e-10	1236	266.991	969.009	177	72.1667	104.833
Cd36_22360	orf19.2167	0.0494657	0.263238	0.187912	1.17039e-16	1353	259.755	1093.24	110	57.6667	52.3333
Cd36_22370	orf19.2166	0.0301303	0.240953	0.125046	6.85618e-18	1152	237.772	914.228	76	49	27
Cd36_22380	orf19.2165	0.0496201	0.276374	0.17954	1.75014e-12	834	174.474	659.526	72	40.3333	31.6667
Cd36_22390	orf19.2220	0.100258	0.202089	0.49611	0.075952	303	66.7977	236.202	34	11.8333	22.1667
Cd36_22400	orf19.2222	0.0639105	0.306651	0.208414	1.23295e-15	1131	240.036	890.964	115	60.4167	54.5833
Cd36_22410	orf19.2660	0.0595328	0.321219	0.185334	6.97579e-17	1107	218.791	888.209	108	57.1667	50.8333
Cd36_22420	orf19.1354	0.0228968	0.220377	0.103898	8.11217e-10	603	115.213	487.787	33	22	11
Cd36_22430	orf19.1352	0.00468344	0.293172	0.015975	5.21182e-19	552	123.629	428.371	32	30	2
Cd36_22440	orf19.1351	0.171942	0.322789	0.532675	0.00357942	624	139.15	484.85	111	36.5	74.5
Cd36_22460	orf19.1350	0.0492804	0.326597	0.15089	3.61005e-17	975	195.763	779.237	89	51.8333	37.1667
Cd36_22470	orf19.1349	0.203879	0.509557	0.40011	8.9535e-05	432	98.6986	333.301	96	36.5	59.5
Cd36_22500	orf19.1348	0.395389	0.620567	0.637141	0.051983	384	87.0607	296.939	128	36.75	91.25
Cd36_22510	orf19.5121	0.0161958	0.438647	0.0369221	1.45088e-108	2763	609.732	2153.27	237	202.5	34.5
Cd36_22520	orf19.1435	0.00283394	0.0666954	0.0424908	7.95673e-11	1374	313.402	1060.6	23	20	3
Cd36_22530	orf19.1434	0.0591859	0.688218	0.0859988	1.80581e-83	2142	455.151	1686.85	301	205	96
Cd36_22540	orf19.1433	0.0245491	0.491033	0.0499948	3.83601e-45	1191	238.686	952.314	109	86	23
Cd36_22560	orf19.3639	0.0402792	0.448934	0.0897218	5.71051e-31	1038	222.021	815.979	107	75	32
Cd36_22570	orf19.3638	0.0528461	0.402212	0.131388	1.47291e-23	1011	220.572	790.428	109	68.6667	40.3333
Cd36_22580	orf19.3635	0.0633723	0.513206	0.123483	1.09427e-127	4662	1054.06	3607.94	611	391.75	219.25
Cd36_22590	orf19.3633	0.116971	0.353582	0.330818	3.01257e-05	480	103.751	376.249	70	29.25	40.75
Cd36_22600	orf19.3631	0.119727	0.495417	0.24167	2.0211e-26	1719	348.432	1370.57	278	126.333	151.667
Cd36_22610	orf19.3630	0.0602471	0.283968	0.212162	3.20881e-15	1272	248.522	1023.48	118	58.75	59.25
Cd36_22620	orf19.3629	0.118099	0.383654	0.307827	4.13174e-21	2133	444.525	1688.48	318	133.5	184.5
Cd36_22630	orf19.3628	0.0274118	0.276628	0.0990926	4.30395e-48	2448	553.282	1894.72	179	128	51
Cd36_22640	orf19.3627	0.0838442	0.410985	0.204008	5.16384e-12	663	140.903	522.097	86	44.5833	41.4167
Cd36_22650	orf19.3626	0.130547	0.357819	0.364842	8.12437e-15	2049	409.696	1639.3	313	116.583	196.417
Cd36_22660	orf19.3625	0.0939017	0.465277	0.201819	4.61718e-18	1029	201.909	827.091	143	70	73
Cd36_22680	orf19.3624	0.0956846	0.415039	0.230544	4.19737e-48	3372	712.419	2659.58	466	227.083	238.917
Cd36_22690	orf19.3623	0.0323254	0.367081	0.0880605	2.82502e-86	3513	726.326	2786.67	299	210.833	88.1667
Cd36_22700	orf19.3622	0.0113905	0.228334	0.0498852	7.33822e-28	1284	266.7	1017.3	64	52.5	11.5
Cd36_22710	orf19.3621	0.193775	0.519707	0.372855	9.85106e-12	1143	273.389	869.611	251	102.5	148.5
Cd36_22720	orf19.3618	0.0844866	0.239082	0.353379	7.38568e-11	1563	409.5	1153.5	176	83.8333	92.1667
Cd36_22730	orf19.3617	0.020069	0.260655	0.0769945	5.57736e-21	1020	203.619	816.381	61	44.8333	16.1667
Cd36_22740	orf19.3616	0.0393159	0.219949	0.17875	7.55293e-16	1338	280.646	1057.35	94	53.5	40.5
Cd36_22750	orf19.3615	0.155782	0.386836	0.402709	2.03641e-09	1392	273.527	1118.47	240	82.6667	157.333
Cd36_22760	orf19.3613	0.0982671	0.299764	0.327814	5.76202e-11	1374	267.433	1106.57	168	66.0833	101.917
Cd36_22780	orf19.3611	0.0634292	0.192163	0.330079	0.0016717	462	100.283	361.717	39	17	22
Cd36_22830	orf19.3610	0.103647	0.446886	0.231932	1.64538e-29	1887	414.094	1472.91	282	139.417	142.583
Cd36_22840	orf19.3609	0.0495003	0.315824	0.156734	4.29186e-22	1269	277.394	991.606	119	71.5	47.5
Cd36_22850	orf19.3608	0.111699	0.4095	0.272769	2.39677e-34	2928	609.776	2318.22	433	192.417	240.583
Cd36_22860	orf19.3607	0.0950104	0.295488	0.321537	1.92814e-10	1332	252.498	1079.5	158	61.6667	96.3333
Cd36_22870	orf19.3606	0.0467784	0.463117	0.101008	3.34777e-15	504	107.083	396.917	55	37	18
Cd36_22880	orf19.3605	0.0914992	0.32531	0.281268	4.26479e-08	687	145.234	541.766	85	38.3333	46.6667
Cd36_22890	orf19.3604	0.101788	0.431951	0.235646	4.67207e-16	1050	210.385	839.615	149	69.0833	79.9167
Cd36_22900	orf19.3603	0.0514591	0.403348	0.12758	1.28852e-44	1977	422.043	1554.96	209	131.667	77.3333
Cd36_22910	orf19.3601	0.14007	0.349219	0.401096	1.08874e-09	1467	294.301	1172.7	232	82.1667	149.833
Cd36_22920	orf19.3600	0.0729031	0.363218	0.200714	4.34519e-11	675	142.411	532.589	78	41	37
Cd36_22930	orf19.3599	0.0532127	0.294528	0.180671	1.23967e-44	3108	698.953	2409.05	294	170.25	123.75
Cd36_22950	orf19.3593	0.00535301	0.301831	0.0177351	3.60483e-42	1203	265.609	937.391	71	66	5
Cd36_22960	orf19.3592	0.0391001	0.562278	0.0695386	4.41361e-69	1899	376.624	1522.38	207	149	58
Cd36_22970	orf19.3591	0.0231939	0.370369	0.0626239	1.65616e-48	1629	359.239	1269.76	134	105	29
Cd36_22980	orf19.3590	0.00296529	0.185991	0.0159432	1.3438e-19	864	188.195	675.805	33	31	2
Cd36_22990	orf19.3589	0.0990362	0.548895	0.180428	1.29666e-20	927	192.255	734.745	143	74.8333	68.1667
Cd36_23000	orf19.3586	0.117051	0.456064	0.256654	9.2595e-12	726	168.517	557.483	118	57.5833	60.4167
Cd36_23010	orf19.3585	0.0064078	0.209651	0.0305642	3.84806e-09	390	76.5453	313.455	16	14	2
Cd36_23020	orf19.225	0.0630269	0.573872	0.109828	5.24312e-34	1059	231.888	827.112	143	93	50
Cd36_23030	orf19.1923	0.145197	3.17072	0.045793	3.94872e-100	1506	333.081	1172.92	401	246.167	154.833
Cd36_23040	orf19.223	0.0485396	0.472545	0.10272	6.25566e-67	2328	512.484	1815.52	265	179.667	85.3333
Cd36_23050	orf19.220	0.0792282	0.307838	0.25737	1.69955e-10	867	201.991	665.009	101	51	50
Cd36_23070	orf19.217	0.0889078	0.390681	0.227571	9.44415e-16	1017	220.843	796.157	134	67.25	66.75
Cd36_23080	orf19.216	0.0374145	0.46366	0.0806938	5.59347e-48	1491	321.94	1169.06	154	111.333	42.6667
Cd36_23100	orf19.215	0.0451884	0.464594	0.0972642	2.32089e-52	1731	397.028	1333.97	196	137.5	58.5
Cd36_23110	orf19.213	0.0152815	0.49986	0.0305716	6.34398e-37	831	169.926	661.074	72	62	10
Cd36_23120	orf19.212	0.0192304	0.510999	0.0376328	1.9089e-33	744	164.623	579.377	72	61	11
Cd36_23130	orf19.211	0.0224152	0.409345	0.0547588	6.08835e-19	528	120.458	407.542	47	38	9
Cd36_23140	orf19.210	0.0290899	0.398829	0.0729382	8.91869e-42	1365	313.583	1051.42	127	97	30
Cd36_23150	orf19.209	0.0444831	0.39817	0.111719	5.91903e-22	846	186.12	659.88	86	57.5	28.5
Cd36_23160	orf19.207	0.0995356	0.434549	0.229055	3.07924e-38	2388	572.275	1815.72	358	188.75	169.25
Cd36_23170	orf19.206	0.19835	0.715911	0.27706	9.11658e-50	3027	687.97	2339.03	725	317.333	407.667
Cd36_23180	orf19.204	0.291712	0.513501	0.568084	0.00314705	600	138.289	461.711	163	51.4167	111.583
Cd36_23190	orf19.203	0.0276396	0.389039	0.0710458	5.15078e-45	1485	342.626	1142.37	135	104	31
Cd36_23200	orf19.201	0.838302	2.09413	0.400311	0.000141576	501	111.027	389.973	275	78.1667	196.833
Cd36_23220	orf19.200	0.043371	0.269855	0.16072	4.47939e-09	570	119.131	450.869	46	27	19
Cd36_23230	orf19.199	0.0473584	0.448787	0.105525	4.63886e-42	1533	334.592	1198.41	168	113	55
Cd36_23240	orf19.198	0.00371356	0.236876	0.0156772	1.16005e-46	1719	369.249	1349.75	80	75	5
Cd36_23250	orf19.4066	0.0226926	0.48765	0.0465346	6.43975e-93	2409	485.296	1923.7	217	174	43
Cd36_23260	orf19.4067	0.0344324	0.332437	0.103576	3.59426e-12	498	111.715	386.285	43	30	13
Cd36_23270	orf19.4070	0.233809	0.384132	0.608668	0.00875578	750	153.855	596.145	166	46.25	119.75
Cd36_23280	orf19.4072	0.113281	0.607316	0.186527	1.1832e-80	3249	853.002	2396	607	355.083	251.917
Cd36_23290	orf19.4076	0.0166272	0.381794	0.0435502	9.05179e-110	3276	721.915	2554.08	258	216	42
Cd36_23310	orf19.4077	0.0265382	0.331761	0.0799919	1.81524e-39	1584	337.554	1246.45	123	90.5	32.5
Cd36_23320	orf19.4078	0.0181969	0.225653	0.0806409	5.23825e-18	984	205.265	778.735	54	40	14
Cd36_23330	orf19.4079	0.0465537	0.295956	0.157299	2.147e-13	774	175.839	598.161	70	43	27
Cd36_23340	orf19.4080	0.0648336	0.416914	0.155509	5.00282e-20	1002	196.982	805.018	113	63	50
Cd36_23350	orf19.4082	0.0246051	0.369889	0.0665204	2.88824e-18	588	133.566	454.434	50	39	11
Cd36_23360	orf19.4084	0.0189102	0.422215	0.0447879	7.42945e-44	1221	257.08	963.92	101	83	18
Cd36_23370	orf19.4085	0.525805	0.652593	0.805716	0.317105	510	107.841	402.159	199	47	152
Cd36_23380	orf19.4086	0.0389619	0.506593	0.0769098	3.472e-23	648	134.399	513.601	69	49.5	19.5
Cd36_23390	orf19.4088	0.0275104	0.437357	0.0629015	2.52664e-27	804	168.48	635.52	73	55.8333	17.1667
Cd36_23400	orf19.4089	0.074818	0.542557	0.137899	5.2338e-32	1224	250.316	973.684	166	96.6667	69.3333
Cd36_23410	orf19.4090	0.0219731	0.482811	0.0455108	1.66846e-61	1500	345.496	1154.5	148	123	25
Cd36_23420	orf19.4091	0.0642513	0.522279	0.123021	2.24552e-29	1053	216.636	836.364	133	81.5	51.5
Cd36_23430	orf19.4092	0.0853015	0.394953	0.215979	8.82138e-09	495	106.391	388.609	64	32.6667	31.3333
Cd36_23440	orf19.4093	0.0129212	0.447764	0.0288572	3.77764e-71	1761	355.911	1405.09	138	120	18
Cd36_23450	orf19.4094	0.154201	0.554157	0.278262	5.29886e-08	489	106.357	382.643	95	41.6667	53.3333
Cd36_23460	orf19.4095	0.0992332	0.453772	0.218685	1.76775e-08	450	89.5857	360.414	64	30.5	33.5
Cd36_23470	orf19.4096	0.019929	0.535488	0.0372165	1.48435e-55	1230	263.892	966.108	120	101	19
Cd36_23480	orf19.4097	0.0507918	0.489171	0.103832	4.674e-72	2571	524.577	2046.42	289	188.5	100.5
[truncated: 3,571 more rows]

## Sheet: Table S9
Table S9. Oligonucleotide primer sequences used in the amplification of Tlo genes and transformation of C. dubliniensis.
Primer name	Primer sequence	Restriction site
CTA21KF (TLO1)	ATGGGGTACCTTTCTGACAACCGCTTCACG	KpnI
CTA1X (TLO1)	ATCCCTCGAGTTGTTTGTAAGTTAGCTGAC	XhoI
CTA1S (TLO1)	ATCGCCGCGGGAAGAGTTTGATGTAGATAG	SacII
CTA21SIR (TLO1)	GGCCGAGCTCAAGAGGGACCCGACCAAGAC	SacI
CdTLO1FP	GGATCCCTAGGCCAATTTTCATCA	BamHI
CdTLO1RP	ACTACTAAAGCCCACAGATGACCAC	SpeI
CdTLO2FP	GGATCCTTTGGTGAGGTAAGGCCAAG	BamHI
CdTLO2RP	ACTACTGAAATTTGTGGTGCGGAACT	SpeI
CaTLO11FP	GGATCCCATTGCGGTCCTTGTAGAT	BamHI
CaTLO11RP	ACTACTGGTGGCAGGTACTTTGTCGT	SpeI
CaTLO12FP	GGATCCGGTGATTTGGTGCATCTACG	BamHI
CaTLO12RP	ACTACTGCTCCGTCAAATTGAACA	SpeI
